# Supplementary material for: Gut microbiota-derived queuine reprograms colon gene expression and alleviates colorectal cancer synergistically with Limosilactobacillus reuteri
Source: Research Square preprint supplement (doi:10.21203/rs.3.rs-7540054/v1), 2025-10-29
Supplement: Supplementary file 1 [file 43376edb13164e329daa92bb.xlsx]

## Sheet: Table S1-brain
geneID	log2(fold change)	p-value	Regulation
Olfr78	2.24677413194279	0.0272987943186332	Up
Mir12181	1.81249754707433	0.024271840200457	Up
Tpk1	1.74631714578097	0.00325458422429952	Up
LOC118568651	1.62702109343385	0.00393477616626694	Up
Colca2	1.4730988971161	0.0193252850752409	Up
Mboat1	1.44900054928211	0.0171380045690643	Up
Satb2	1.43393416267136	4.77564247216188e-10	Up
Dnah14	1.42725677268447	0.0333623523236873	Up
Otop2	1.42553739828561	0.0193430669263128	Up
Spag6	1.42244930806467	0.0308592105169011	Up
Sorbs2os	1.36844180458793	0.027495360572103	Up
Ccbe1	1.31703882577336	0.000179546706968179	Up
Cdhr1	1.30074778718544	0.0183911256306843	Up
Cd6	1.27621445984926	0.0280775804063081	Up
Gpr88	1.26854372443909	4.08200778745254e-12	Up
Gcnt4	1.23715872488989	0.00119555548849935	Up
Eno1b	1.23484777717865	7.5752213474561e-06	Up
Col24a1	1.22570653973708	0.0050263530967246	Up
Rnf139	1.22377530735562	0.00020401816922406	Up
Galnt4	1.21601486539226	0.0120038346444478	Up
Cd34	1.21155177181129	0.000142841390878211	Up
LOC118568312	1.18324552459214	2.06618839788122e-06	Up
Snord49a	1.17850566131349	0.0196404684809126	Up
Ntng2	1.17329035778562	5.83630247383503e-07	Up
Krt80	1.16764222277342	0.00181133730685529	Up
Tmem252	1.15794052439387	0.0167312874453768	Up
Oprk1	1.14782015008648	0.00276375254026963	Up
Lifr	1.14020140109051	3.03485916624525e-06	Up
Pcdhb12	1.11842209671555	0.00713999853916224	Up
Mme	1.10210344330458	0.0030966170168049	Up
Myo5c	1.09600835994156	0.00619855578858333	Up
Glt8d2	1.08479513699706	0.0117162036331775	Up
Slx4ip	1.08478734048493	0.00601186193068608	Up
Chn1os3	1.06731648702413	0.0392144371195163	Up
St6gal2	1.05782200524204	8.70077128476371e-05	Up
Zfp558	1.0560788662864	0.043222040434358	Up
Gcnt2	1.0496544599736	8.29516480857128e-08	Up
Zfp101	1.04320211777246	0.0341683694650349	Up
Man1a	1.03702951217948	1.79732909603932e-06	Up
Osbpl3	1.03516586422498	2.87807496792706e-06	Up
Cx3cl1	1.01230994588527	2.76429464508045e-10	Up
Acer2	1.00365939864007	3.82573761244427e-05	Up
Rorc	-1.00069	0.0189222489005328	Down
Mamdc4	-1.0015	0.00893324747965208	Down
Larp7	-1.00497	1.11165503903096e-05	Down
Myl7	-1.00552	0.0302624481229394	Down
Pi16	-1.01	0.0248176516271091	Down
Sp110	-1.01383	0.0403406545782983	Down
Rpl23	-1.01779	5.58986942069016e-10	Down
Hspb1	-1.02036	8.11021467533295e-05	Down
Slc47a1	-1.02106	0.00540392317854658	Down
Xlr3b	-1.02199	0.0351363262867419	Down
Myo6	-1.02384	2.13770028791123e-06	Down
Ndufa5	-1.03643	2.22554177102947e-10	Down
Aqp1	-1.03724	0.0106432943232462	Down
Zfp30	-1.03949	1.8033843400647e-06	Down
Magohb	-1.0419	0.0244116663930063	Down
LOC118568402	-1.04257	0.00279423424328763	Down
Abhd11os	-1.04283	0.0277550338801203	Down
Lsm6	-1.04421	6.22183321413912e-10	Down
Snrpd1	-1.04427	4.2367426520694e-09	Down
Rp9	-1.04503	1.14587730009732e-06	Down
Nsrp1	-1.05231	5.83158575560681e-09	Down
Itih2	-1.0534	0.0337937838678936	Down
LOC118567453	-1.0537	0.00222990367729135	Down
Ccdc173	-1.05512	0.0061396331401294	Down
Nop58	-1.05569	1.97560746367476e-07	Down
Col9a3	-1.05749	0.000102981306635232	Down
Efcab2	-1.0592	1.10147669310005e-06	Down
Eif5b	-1.0657	8.33238973707842e-10	Down
Mmp9	-1.07268	0.0479753972350796	Down
Myo1a	-1.0748	0.0162666276308612	Down
LOC118568658	-1.08192	0.00105757970467052	Down
Ctxn3	-1.08272	0.0357673099888281	Down
LOC118568020	-1.08537	0.00668109244872737	Down
LOC118568315	-1.08645	0.0101102370648701	Down
Rps10-ps1	-1.08653	2.48455997996856e-05	Down
LOC118568536	-1.08778	0.0352474135438988	Down
Rps27a	-1.08989	7.15725742851215e-07	Down
Cd63	-1.09002	9.25866345221238e-11	Down
Ifit3	-1.09005	0.000406773015780376	Down
Rpl21	-1.09595	1.99084164160616e-08	Down
Cbx3-ps6	-1.10868	0.0423009397938204	Down
Rpsa-ps10	-1.11411	0.000291035888824821	Down
Sostdc1	-1.11723	0.00447164529961652	Down
Fhad1	-1.11793	0.000602629760822167	Down
Apoa1	-1.1182	0.046862327836922	Down
Cidea	-1.12469	0.0164466170341497	Down
Col18a1	-1.12949	0.000262780750504893	Down
Rbp1	-1.13159	5.01431076350252e-07	Down
Naa15	-1.13305	6.26303734884543e-11	Down
Tmem52	-1.13411	0.0367373243749087	Down
Trhde	-1.13418	2.410918247549e-07	Down
Gprc5c	-1.13658	0.00881851156541556	Down
Mia	-1.14016	0.0116716019314276	Down
Tshb	-1.14492	0.0301816118590955	Down
LOC105246046	-1.14631	0.0391161217363606	Down
Mest	-1.15042	6.79843754122951e-11	Down
Rad54l	-1.15138	0.0337305170550663	Down
Ager	-1.15289	0.032003434674712	Down
Sema3b	-1.16345	0.00498819606907763	Down
Hmgn5	-1.16389	1.02566465475539e-06	Down
Cwf19l2	-1.1657	3.88750440377434e-06	Down
Cd52	-1.1668	0.00499178645009751	Down
Akap17a	-1.16783	1.73455965584313e-10	Down
Fam183b	-1.17071	0.0349054001615069	Down
Mybpc3	-1.17219	7.53793981233991e-05	Down
Sh3bgr	-1.17303	0.0099082357388077	Down
Krt18	-1.17933	0.0305928608828539	Down
Gck	-1.17978	0.00858094464789032	Down
Ccdc153	-1.18329	0.00151227651765401	Down
Rbm25	-1.18826	2.93908551290937e-13	Down
Rpl35a-ps3	-1.18967	0.0222031661909824	Down
Spc24	-1.19043	0.0270805318966531	Down
Haus7	-1.19057	0.000702649408616356	Down
Rfc3	-1.1912	0.00832478375658883	Down
Selenok-ps1	-1.20048	0.0333457290758333	Down
Spp1	-1.20123	0.00691840240999733	Down
Ccdc34	-1.20188	1.9482024646546e-08	Down
Rpph1	-1.20504	0.0132688700633475	Down
LOC118568040	-1.20931	0.0242891036227025	Down
Asgr1	-1.21181	0.022835112158008	Down
Arglu1	-1.21501	5.61461008049236e-10	Down
Kcne2	-1.21829	0.0350448074641471	Down
Atp5k	-1.22246	1.19474287202589e-11	Down
Cdc42bpg	-1.22287	3.58838819447785e-05	Down
Rps12-ps10	-1.22559	0.0131488304479523	Down
Cd300a	-1.25034	0.0315386259449852	Down
Foxc2	-1.25823	0.0211699299558062	Down
Lhx1	-1.26496	0.0305940169912651	Down
Muc6	-1.27305	1.92730322152535e-05	Down
Rps12-ps9	-1.27426	3.04344790711114e-06	Down
Eya2	-1.27828	0.00149082338198485	Down
Rn18s-rs5	-1.28132	0.00586398998251099	Down
Slfn2	-1.28187	0.00459249115093348	Down
LOC102632415	-1.28197	0.0470312005232555	Down
LOC118567330	-1.28305	3.56368925707507e-06	Down
Traf1	-1.28325	0.0123810606061966	Down
Slc1a6	-1.28745	6.46362730071435e-06	Down
Ggt1	-1.28815	0.0174959734735906	Down
LOC118568007	-1.29046	2.52976124669127e-05	Down
Guca1b	-1.29916	0.0250590837380512	Down
LOC105244649	-1.30172	0.0306280337651964	Down
Il20rb	-1.30867	0.0214526252476616	Down
Rpl21-ps8	-1.31194	0.0159861610241271	Down
LOC118567627	-1.31351	0.00906798382739833	Down
Pabpn1	-1.32065	2.1859836074262e-09	Down
Fam174c	-1.32552	4.57606624135842e-05	Down
LOC118568539	-1.32861	0.0116622277558957	Down
Pax5	-1.33082	0.0233792945828674	Down
Ltb	-1.33422	0.0445248390242745	Down
S100a9	-1.34154	0.000296340494055109	Down
Mns1	-1.34471	0.00131808250500957	Down
H19	-1.3472	0.00450670149011679	Down
Lbhd2	-1.36172	0.00464399722492026	Down
Rps2-ps8	-1.36605	0.0217912644216221	Down
Col7a1	-1.37377	4.66494788933273e-07	Down
Capg	-1.3752	0.0210088381316849	Down
Pin4	-1.38873	9.8705960354994e-07	Down
Luc7l3	-1.40513	3.7012844588316e-21	Down
En1	-1.42006	0.0219100382226603	Down
Lpxn	-1.42012	0.0272527445719152	Down
Cilp2	-1.42865	0.0199392569869723	Down
Rpsa-ps9	-1.45601	0.0033799733641076	Down
LOC115489019	-1.45687	0.029006591523997	Down
Wfdc2	-1.45692	0.0106439929151707	Down
LOC118568558	-1.4595	8.70792509576083e-06	Down
Rps6-ps3	-1.46313	0.039845964069621	Down
Arl9	-1.46759	6.20637231713874e-05	Down
Slc6a12	-1.46814	0.00441629453086686	Down
Arhgef33	-1.47206	0.000961644574941205	Down
Myo15	-1.47893	0.0301718217622545	Down
Chd7	-1.48809	0.00171087066580312	Down
Atp5k-ps1	-1.49442	3.07102617179825e-06	Down
Loxl2	-1.50693	0.0427821668136973	Down
Adgb	-1.51194	0.0359905120415048	Down
Cdh1	-1.52292	0.0205442866855433	Down
Wbscr25	-1.52455	0.0487198117555758	Down
Myocd	-1.52666	0.0400146893478948	Down
Hes3	-1.53195	0.0090943915987027	Down
H2ac19	-1.53831	0.0170245597481237	Down
Trim12c	-1.54425	1.28009420613386e-05	Down
Mdfi	-1.54955	0.0172907576593365	Down
Ppp1r3b	-1.57448	0.00992719319666878	Down
F13a1	-1.5846	0.0172688365067706	Down
Phf20-ps	-1.59103	0.0404647188543672	Down
LOC118568745	-1.59351	0.0134922607464242	Down
D17H6S56E-5	-1.60448	0.00113655419899938	Down
Malat1	-1.62212	1.40644984187227e-21	Down
Col13a1	-1.62389	0.0134887872057538	Down
Tfap2b	-1.63394	4.46978915872722e-05	Down
Rpl27-ps1	-1.64647	0.00410281781487371	Down
Ms4a4a	-1.66014	0.0129271959217891	Down
LOC118567457	-1.68014	0.0177400052272474	Down
LOC118568797	-1.68055	0.0211171559478473	Down
Barhl2	-1.70479	0.0041427983870487	Down
Fgf17	-1.71543	0.0344591530178847	Down
Krt8	-1.71762	0.0208157560111621	Down
Tulp2	-1.75486	0.0180463333180689	Down
Pkp3	-1.7969	0.0364455434450994	Down
Cibar2	-1.81507	0.00317871059890131	Down
Six1	-1.83828	0.0122605035583708	Down
Rpsa-ps2	-1.83833	0.0266650180455234	Down
Ndufs5-ps	-1.86499	3.86502011456731e-07	Down
Rpl18a-ps1	-1.8686	0.0360995206917211	Down
Cldn3	-1.86901	0.0246646301912268	Down
Nkapl	-1.87696	0.0024559340754171	Down
Rassf7	-1.90983	0.0141233534552351	Down
Prr15	-1.92111	0.0138583985021451	Down
Smim22	-1.926	0.00486502185053571	Down
Misp	-1.93893	0.00256807800363668	Down
Svep1	-1.94067	0.00684691088343036	Down
Unc13d	-1.94677	0.0001260440241089	Down
LOC118568795	-1.94693	0.0273046060223959	Down
Lhx1os	-1.96013	0.0011727510194837	Down
Zfp385c	-1.97029	0.00206374348566379	Down
Bcl2l15	-1.98343	0.0005173870940129	Down
Avil	-2.03514	0.0022483356781483	Down
Epha1	-2.04193	0.00990257550471159	Down
Ppp1r17	-2.06284	0.0299040115431164	Down
Dao	-2.09034	0.0282160433321652	Down
Plac8	-2.13875	0.00799928306015872	Down
Pigr	-2.33814	0.0078434436856594	Down
Pgam1-ps2	-2.41548	0.0140300712404427	Down
Lhb	-2.46343	0.0469317934634593	Down
Camp	-2.48467	0.00864681422590833	Down
Dct	-2.64012	0.0104668897946491	Down
Rpsa-ps12	-2.65393	0.0048543848335931	Down
Hspb2	-2.78907	0.00872282475643226	Down
Slc5a1	-2.82354	0.00577356835340468	Down
Dapl1	-3.54258	0.000609599447412603	Down

## Sheet: Table S1-colon
geneID	log2(fold change)	p-value	Regulation
Best2	8.58498722397707	4.71762221604436e-08	Up
Akr1c18	7.47450793141236	2.85807342601853e-06	Up
Ugt1a6a	7.23845046960106	2.39864661250946e-06	Up
Mkx	7.11529584382914	9.86917676663638e-08	Up
Dhrs9	6.82910574262254	1.28646565464605e-06	Up
Hoxaas3	6.79060956087367	7.74570456955273e-07	Up
Calb2	6.74535467995775	2.42914230385093e-08	Up
Igf2bp1	6.58818556133478	9.85267483747917e-05	Up
Pla2g2c	6.53241844675763	3.27349701351336e-05	Up
Wfdc13	6.43151569470379	0.000444792457310229	Up
Tspan11	6.22655484680826	0.000103328828172276	Up
Cyp2d10	6.19007918205544	3.79911310910812e-09	Up
Hoxa11os	6.15146950171777	0.000548358905157993	Up
Lrrc31	6.10443521184123	6.05702694656754e-06	Up
Tdrd1	6.06030475249053	9.94121274236026e-05	Up
Selenbp2	5.9402903905692	1.03351638456321e-05	Up
Epha4	5.93717479549181	1.155554673004e-06	Up
Fa2h	5.78914109241081	1.31756110535465e-25	Up
n-TKctt28	5.73423004911406	0.000573914911698558	Up
Cyp2d12	5.73353835060531	5.67420489673049e-08	Up
Cyp2w1	5.68318150981263	6.86905321499628e-08	Up
Scnn1b	5.67504512537953	3.73084964144398e-05	Up
Aqp8	5.66208237878394	7.94352480804486e-20	Up
Ly6g	5.63930705208843	0.0014860518351381	Up
Actc1	5.61908289376996	0.00127051542802013	Up
Igfbp2	5.57311691487354	0.00134861722995418	Up
Il17d	5.53087543635321	1.16625360708177e-07	Up
LOC118567855	5.52940813911257	0.000146423709087526	Up
Zan	5.52222103513068	1.12508411714679e-14	Up
Hao2	5.39875995491058	8.54218175903115e-13	Up
Cyp2c55	5.3953604699465	8.86081411377914e-13	Up
Ttll6	5.39221594483495	0.0086209399693307	Up
Abca12	5.38803130866111	1.61864605881892e-06	Up
A4gnt	5.27240113547808	2.63491368847072e-05	Up
Lrrc8e	5.22037680196108	1.68459009919858e-10	Up
Tnni1	5.19535075138722	6.84635321586485e-12	Up
Vsig8	5.17003711512889	0.000499295550763899	Up
Ern2	5.16482504384239	5.93177705226457e-09	Up
Fer1l4	5.13206051676284	7.18221194096421e-08	Up
Defb37	5.10329773263546	0.000502460818575258	Up
Hsd11b2	5.10231648003195	2.64036202691569e-14	Up
Fut2	5.08786896153736	5.03743643626291e-11	Up
Ly6g6c	5.08263123247395	0.000411245210774287	Up
Pla2g10	5.07996700815796	5.82476594746049e-16	Up
LOC118568762	5.07791252264757	4.90695846187811e-07	Up
B3galt5	5.04026840566694	2.05839885110065e-10	Up
Cyp2c65	5.04022853998124	1.69343410380512e-08	Up
Muc4	5.01646359414832	8.09737290868174e-21	Up
Slc6a14	5.01568400026535	4.33126329489346e-16	Up
Etnppl	5.01331882165035	0.00150874876436285	Up
Cutal	5.00323020321551	4.50399870125705e-09	Up
Nos1	5.00182334686361	0.00746053123338705	Up
Hpd	5.0004329111283	4.50092026855275e-14	Up
Gal	4.99775538695761	1.16032729348949e-05	Up
Sult1c2	4.98372886801083	5.50488880452104e-05	Up
Cbs	4.96397939227534	4.62424622224821e-14	Up
Cyp2d34	4.9630884622306	9.30755664747441e-13	Up
Reg4	4.94512300375416	6.89726307226094e-07	Up
Retnlb	4.92461190626689	6.89441132632676e-13	Up
Aadac	4.92124090710248	1.54958335954623e-07	Up
Gsdmc3	4.88764378566602	1.68890599298166e-09	Up
Gpr37l1	4.88670916768484	1.83285360305754e-06	Up
Gsdmc2	4.88562923963047	1.09123704727163e-11	Up
Sh3rf2	4.86023682517277	5.92857966990896e-08	Up
Slc6a17	4.83899107398563	2.69474177291961e-06	Up
Acer1	4.82361345814035	6.26367093585735e-12	Up
Sema3c	4.81848482739001	1.98780160519354e-17	Up
Aqp4	4.81076437071832	6.93765345451592e-06	Up
Ces2b	4.8011025687058	5.39247250656072e-05	Up
Tmem171	4.76633285730355	1.13004942684111e-12	Up
Slc26a3	4.71109258797274	6.91757180205399e-08	Up
Auts2	4.70666882557412	1.29847528508461e-09	Up
Chgb	4.70062549170921	7.88035754089824e-11	Up
Mroh3	4.69809949887196	4.74099497469429e-09	Up
Ces1e	4.67970779895156	2.99100485342665e-07	Up
Ces1g	4.67287876377339	1.40484709528335e-06	Up
Elapor1	4.66068464692568	1.10764780065587e-08	Up
Rpp25	4.65584063124948	0.00459093720164767	Up
Abcc6	4.65451574271405	1.62084466476127e-06	Up
Cd177	4.65399611404904	8.51650394530359e-12	Up
Plch2	4.65174334596091	3.32890788123088e-18	Up
Dmbt1	4.64866413880334	1.21265543868029e-14	Up
Hoxa9	4.64816755891228	4.32621520060308e-08	Up
Scnn1a	4.63635399481207	1.76542228218387e-08	Up
Ppp1r9a	4.61622169381069	8.38803421580509e-16	Up
Bean1	4.60314568039078	1.29556048448133e-07	Up
Tph1	4.5894246303945	8.67369230314743e-08	Up
Nipal2	4.58204968850134	2.22954222422506e-07	Up
Pllp	4.5168064594094	1.22815002391258e-22	Up
Gstm6	4.51315074750748	1.0082282674005e-09	Up
Kif12	4.50130256172652	5.98326883039976e-09	Up
Saa1	4.4954593237765	2.0183516374299e-15	Up
Mtcl1	4.49412735815491	2.608294831282e-07	Up
Atp2c2	4.48524185495072	5.27697840184819e-07	Up
Sval1	4.48439898841293	7.54296992228906e-05	Up
Hsd17b13	4.48142278030028	3.73161563561996e-05	Up
Paqr5	4.47867799259195	3.6492587690333e-15	Up
Cwh43	4.46706615500838	2.81423489880898e-06	Up
Cyp2d37-ps	4.46501634781975	7.24067570303923e-05	Up
Tat	4.45047274369483	1.50358429487809e-08	Up
Arfgef3	4.44703695469323	1.05563702080769e-08	Up
Sprr2a3	4.43757220747248	7.30115476417401e-12	Up
Hgfac	4.41828252895211	1.44828558369384e-08	Up
Pparg	4.41641642558513	9.81479766037891e-16	Up
Gcnt3	4.40900918057359	2.48780915142203e-12	Up
Pdzk1ip1	4.40800349258357	2.51868082042245e-10	Up
Slc9a3	4.40090722841166	1.2308923037125e-10	Up
Sycn	4.39586536647596	2.19190047364315e-06	Up
Hmgcs2	4.37043305055653	2.24442910709837e-11	Up
Hoxd10	4.3619787326946	3.66912011045292e-10	Up
Hsd3b3	4.36123340068408	5.62858866599484e-11	Up
Car1	4.35265138434065	3.02938183039563e-06	Up
Tmprss2	4.33356828890074	6.86760799365784e-07	Up
Abcc8	4.32834131297099	0.00032696558045524	Up
Cpxm2	4.31933087791312	1.11271266571196e-07	Up
Cyp2d9	4.31799181388702	2.62298628834467e-06	Up
Cdsn	4.31299029484685	0.00381893061757583	Up
Slc10a5	4.31105308507273	9.15728110890368e-08	Up
Fyb2	4.31001195662823	0.00456798608497015	Up
Aspg	4.30590997618176	5.63494018184966e-13	Up
Gstm3	4.30512516476421	1.87316638308428e-07	Up
Ugt1a1	4.30235149792813	0.000548618970484663	Up
Klk1	4.28818426531042	4.17915110920932e-12	Up
Tspan1	4.28800484716189	4.26538245424357e-17	Up
Flnc	4.28319942506998	2.21479339799169e-09	Up
Meg3	4.27994985359338	3.33472630583364e-07	Up
Il17re	4.26504440862587	7.49357037833086e-09	Up
Fst	4.25442418150553	9.3724125667256e-05	Up
Marcksl1-ps4	4.25088318673981	3.72941190347203e-05	Up
Prom1	4.24501026233055	7.82819988404572e-12	Up
Lypd8	4.24462949031676	8.24777841540237e-09	Up
Ugt2b5	4.23595361535185	1.14663580161163e-05	Up
Selenbp1	4.22939012533547	3.49276170578083e-20	Up
Syt2	4.22459761189711	0.000674775744802938	Up
Ildr1	4.22185713707599	2.36121747539791e-14	Up
C1qtnf3	4.2206849228706	4.47268192414861e-06	Up
Snhg11	4.22039217274895	0.000114082382945028	Up
Galnt5	4.21810133268326	2.84668706984701e-10	Up
Gcg	4.20781452819699	1.17964465501132e-08	Up
Casq1	4.20415938305011	0.00135239557470294	Up
Arhgef38	4.20092308192209	3.0433349844858e-08	Up
Hmcn2	4.19260661378871	1.23692328341079e-07	Up
Hmga2	4.18334404383203	3.54544708997584e-08	Up
Efhc1	4.18324283904375	0.00206264745342211	Up
LOC118568020	4.18257715711541	8.59018367703788e-08	Up
Hsd3b2	4.18177862123773	2.88192315694012e-09	Up
Gvin-ps1	4.18113723622648	4.56661597414714e-09	Up
Ttr	4.15436245003312	6.96453051597421e-05	Up
Gfap	4.15318734129217	9.20908706475538e-06	Up
Sptssb	4.15312001259911	7.15068204552756e-11	Up
Agr2	4.14884211088996	8.86761589940825e-07	Up
Mettl7b	4.14330299463865	7.0332266008614e-06	Up
Rdh18-ps	4.12174915726865	0.000116414487755987	Up
Lypd8l	4.11410455888207	2.92399043814965e-06	Up
Myl7	4.11400952107101	0.000167420793835906	Up
Adra2a	4.1109140621611	4.2860920430277e-13	Up
Muc3a	4.10471399957029	1.90064226956489e-08	Up
Fgfbp1	4.08074886927806	5.35977285142188e-17	Up
Fam189a2	4.0794976246192	4.45042954246652e-09	Up
Mamdc2	4.07449425139176	2.74451540932725e-07	Up
Tst	4.07039434344822	2.30761439095115e-32	Up
Rin1	4.0663725032486	1.98486757535679e-05	Up
Gsdmc4	4.05614217315452	2.73105737090938e-07	Up
Hoxb9	4.05232224089258	1.25683998233483e-16	Up
Plet1	4.05027271635669	4.38682401472157e-11	Up
St6galnac6	4.04216076628374	2.12902813870968e-19	Up
Cspg4	4.03748109592642	9.04329232983169e-08	Up
Edn1	4.02671073886455	1.21059587652215e-08	Up
Ceacam1	4.02012252333349	2.85668288685933e-08	Up
Sprr2a2	4.01773476441838	0.000191844349183608	Up
Itga7	4.0175064770813	3.1557696146571e-16	Up
S100a14	4.01576660655504	3.44682214234565e-07	Up
Foxa2	3.99681016798488	6.80365778968012e-05	Up
Hnf1b	3.99371099879171	3.13192270526673e-15	Up
Vip	3.98884386972941	0.000372371942787199	Up
Ptn	3.98827656189004	7.63110843491481e-08	Up
Ly6g6e	3.98275687911421	0.00180209004017429	Up
Tmem139	3.97580085194997	8.96452348578702e-07	Up
Fxyd3	3.96909399679524	3.21579220616491e-06	Up
Efemp1	3.96567147675867	4.56419639694279e-11	Up
Muc2	3.95262365533092	3.91544253262842e-05	Up
Abcc3	3.95095972789492	5.52105465336597e-14	Up
Wfdc18	3.9440162985671	4.38489366365316e-06	Up
Epn3	3.94358218578776	7.2148678781473e-09	Up
Slc24a3	3.94099594180316	1.42415018784109e-05	Up
Satb2	3.93927907752408	1.08135536465782e-13	Up
Hoxa7	3.93638090193829	3.571824904605e-30	Up
Shank2	3.93302094512773	4.02235932776194e-09	Up
Ttll10	3.93027652729243	3.18959213233245e-09	Up
Prph	3.92968164095815	0.000153065716474384	Up
Col4a5	3.92160632421367	1.59518293630153e-06	Up
Aldh3b2	3.92016550501997	6.97021764514298e-06	Up
Gap43	3.90766508049204	0.00212310874226228	Up
Mira	3.90257568734033	2.01503487372178e-18	Up
Pla2g10os	3.90247158323325	4.63017579827753e-07	Up
Steap1	3.90219155706462	0.000155709777736692	Up
Prss32	3.90171492732824	6.19703242370531e-07	Up
Rdh16	3.89970534026199	0.021659432953066	Up
Hspb7	3.87164304439081	0.0002531983089492	Up
Vstm2l	3.86875462024343	5.50594123825455e-05	Up
Sult1a1	3.84662857481852	3.85393203481209e-38	Up
Oit1	3.84238901718295	2.60586163247479e-07	Up
Esrp1	3.83757265498982	4.03599354063028e-10	Up
Myh11	3.83409370719881	2.39130101231778e-07	Up
Penk	3.83279071726386	1.22497903033274e-06	Up
Rnf186	3.83200841391935	4.97794095580129e-12	Up
Myom1	3.82445887707219	4.1654003634695e-07	Up
Prelid2	3.82022523371743	9.67074599199122e-09	Up
Carmn	3.81842404162035	1.54756209630993e-09	Up
Ephb2	3.81521936943353	3.0059762299133e-21	Up
Ces1f	3.81037292530739	1.80346443140173e-06	Up
Pitpnm3	3.80318178563342	4.16039652714448e-09	Up
Krt19	3.80145881579446	1.02231068277484e-08	Up
Hoxb5	3.79950543508942	1.53240459135903e-05	Up
Arhgef28	3.79483288545638	1.8348908482973e-08	Up
Pcsk1n	3.79265444479256	0.000116055822642839	Up
Noxa1	3.79068588651845	1.3433584234517e-06	Up
Pla2g3	3.78599862520657	8.84441365905975e-08	Up
C3ar1	3.7807331129726	1.01662796623342e-09	Up
Foxd2	3.7637410484393	4.14128031638984e-23	Up
Sprr2a1	3.76195130369051	1.3846434786843e-06	Up
Wfdc1	3.75697710093435	1.48543783146401e-05	Up
Myo3a	3.75627365376137	0.000278940823009905	Up
Ahnak2	3.75160722916207	2.24128424598676e-05	Up
Hoxb8	3.74725750792364	5.14480889217074e-05	Up
Map3k21	3.74462652715289	5.61153995959012e-10	Up
L1cam	3.73600531206281	1.45279089886709e-11	Up
Mal	3.73242495680981	4.12111007801578e-08	Up
Tstd1	3.73004935279576	7.87096242148611e-19	Up
Akr1b8	3.72595298050823	1.86178752363742e-19	Up
Sema4g	3.72495474727519	8.73521575897876e-05	Up
Ethe1	3.7161545673963	2.78398150022933e-15	Up
Htr4	3.71323542843734	2.85973500951406e-05	Up
Clmn	3.71302743129848	1.1836955716196e-16	Up
B4galnt2	3.70099961870715	0.000156231973792385	Up
Ovol2	3.69768084213897	1.46030932339323e-06	Up
Lrig3	3.69251220466164	1.70652048280773e-06	Up
Ceacam2	3.69004260536946	0.000115136874659301	Up
Ptprn	3.68814917180448	3.65853681207614e-05	Up
Rapgefl1	3.68666416702814	3.94908494252361e-07	Up
Slc44a3	3.68436565286417	7.90788698726869e-07	Up
Pde3a	3.68263789588834	3.899212267777e-09	Up
Esrp2	3.68156288715523	2.03555436658247e-09	Up
Bfsp1	3.67846043771014	0.00168591606333801	Up
Zfp612	3.67039897876856	3.35156885308583e-08	Up
Vwa5b2	3.66858596536601	2.37519274692906e-05	Up
Sdk1	3.66617256170369	1.48340440562039e-06	Up
Kcnk1	3.66402931364713	8.45558284990596e-05	Up
Car2	3.64057174619901	5.37804334955784e-17	Up
Elfn2	3.63783254969484	5.13544023433251e-05	Up
Adamdec1	3.63610416394874	5.99993219342372e-08	Up
Tns4	3.63025154791006	3.93199750937118e-09	Up
Ccn3	3.62690133827858	0.000320967583342898	Up
Pdia5	3.62180307437278	2.52606461115428e-15	Up
Mboat2	3.6057338013278	1.61864807388743e-06	Up
Mmp28	3.60501253540478	6.11594846448771e-06	Up
Cpn1	3.59750955692745	2.70261523062672e-05	Up
Ephb3	3.59454825396706	2.10799147527916e-07	Up
Tmem255b	3.59381821335041	3.75382591952908e-10	Up
Kcnq1	3.5876661319489	1.97338111283091e-11	Up
Gsta4	3.58438234981904	4.56016577535188e-08	Up
B3gnt6	3.57507814078518	2.52784942259839e-09	Up
Serpinb5	3.56757797092319	1.07812151551396e-05	Up
Akap6	3.56559087679829	1.91951615955362e-06	Up
Nqo1	3.56299287640791	1.27814944247979e-08	Up
Tnfsf13os	3.55387778887114	4.49199169669959e-07	Up
Kcne3	3.55350963464719	1.27450530532578e-08	Up
Kcp	3.55307685611499	0.000119843086914006	Up
Rep15	3.54854358518527	3.20519465181888e-09	Up
Plekhd1	3.54477795712691	9.54948633178073e-06	Up
Trim16	3.54211846893549	8.38732360531609e-10	Up
Dio1	3.53530627193617	1.00293505790396e-05	Up
Lrrc26	3.5327499272643	0.000321506419047027	Up
Rab3b	3.53256146199521	1.63847425929227e-06	Up
F3	3.53217871716145	5.52000204523495e-09	Up
Slc22a1	3.52770335625687	0.00062451408287223	Up
Creb3l1	3.51768127761676	1.33833049666576e-11	Up
Lgr4	3.51724180259806	2.55777715051604e-05	Up
Ms4a12	3.51722946771936	7.99546257849651e-08	Up
Col6a5	3.51176749912932	0.000341299792707099	Up
Car4	3.50584783993914	1.92227314641846e-05	Up
Spon2	3.50494206937992	9.70530280890348e-10	Up
Tbc1d2	3.50371215828477	1.99362473685244e-17	Up
Tnip3	3.50218566905716	6.36860758831053e-07	Up
Ybx2	3.49990041348777	1.54080095119953e-05	Up
Cabcoco1	3.49895525579467	0.0096008251960011	Up
Clcn2	3.49866875213554	1.06295538405885e-09	Up
Nr3c2	3.49866738856806	1.57200172912913e-07	Up
Kcnip4	3.49647088504004	0.00092046377828921	Up
Kcnf1	3.49625631335978	0.00259481179447557	Up
Slc12a8	3.49397072914466	7.19445630238858e-09	Up
Slc2a13	3.49298035194341	5.97124560228123e-10	Up
Cnn1	3.49287629891918	8.79566120291906e-05	Up
Tfcp2l1	3.48357759717487	3.11441384937321e-08	Up
Ociad2	3.48024520145826	4.31814798317618e-09	Up
Slc2a10	3.47440834596043	3.68868373718074e-07	Up
Parm1	3.46651909155446	6.70661170558113e-16	Up
Ablim2	3.46626080634353	8.72734684247669e-09	Up
Pyy	3.45966890271827	0.000107684136015229	Up
Ffar4	3.45964147915709	2.13353094754709e-10	Up
Mst1r	3.45603194359065	0.000123044126284497	Up
Pof1b	3.45547635557806	1.0043888778748e-08	Up
Ano1	3.44762909825084	6.37393215133639e-05	Up
Atp10b	3.44326133832157	2.92101285104193e-05	Up
Cbr3	3.44310719698769	4.6872006569048e-09	Up
Cftr	3.43877152080195	0.000310777669493215	Up
Guca2a	3.43449574673923	5.25954586579181e-05	Up
Myo5c	3.42770897182352	4.60142687129667e-06	Up
Steap3	3.42683771212639	8.61513888166142e-10	Up
Rab25	3.42008429527403	1.3842721969799e-08	Up
Sgsm1	3.41985599535918	3.96849685753725e-06	Up
Slc37a2	3.41773102486095	0.000376994703692518	Up
Mgst3	3.41743573582552	3.40731979253466e-05	Up
Csdc2	3.41646394261635	3.99117747304862e-05	Up
Snord118	3.40172309601826	5.08705899620666e-06	Up
Mecom	3.39969881751005	1.74375497828687e-23	Up
Pdzd7	3.39704329921059	2.08544276888962e-06	Up
Mgat4c	3.39645265307607	3.05507473626707e-05	Up
Clca3b	3.39294803353517	9.80380458642479e-05	Up
Fgfr4	3.39233736755198	2.59971523700518e-10	Up
Hif3a	3.39127527418953	7.19059954494236e-07	Up
Cdx1	3.38434366079881	3.14728213610564e-06	Up
Igsf9b	3.38028074416448	3.05346375011210e-09	Up
Inpp5j	3.37982487666413	4.15133760062025e-08	Up
Car12	3.37749999751803	1.01886052948003e-05	Up
Smtn	3.37629390799776	7.47542555693576e-09	Up
Ehf	3.37480336883894	9.53196616270794e-13	Up
Srd5a2	3.37285888285502	2.55033144745827e-05	Up
Akr1c19	3.36687680601606	2.57510127866222e-06	Up
Mansc1	3.36559469416713	3.3977571681771e-14	Up
Foxa1	3.36447729369272	1.08717755561145e-08	Up
Fam13a	3.36083531075105	1.4978573422782e-09	Up
Slfn4	3.35547577857653	0.00045485670480336	Up
P2ry1	3.35470853904588	0.000126545027546329	Up
Tlcd4	3.35232575262754	0.000310202754536257	Up
Actg2	3.34849769777161	5.67185137089713e-05	Up
Shisal1	3.34670399296296	0.000328285059072194	Up
Shisa2	3.34328462862257	1.43245975147079e-05	Up
Pnck	3.3425629809648	3.59171770547414e-05	Up
Hoxb6	3.34066892443389	0.000180630689532592	Up
Mettl7a1	3.33828581832308	2.28870463450849e-15	Up
Greb1	3.33494504036721	0.000951621569879486	Up
Serinc2	3.33392363216268	1.79179598430596e-05	Up
Akr1c14	3.33290799638729	4.80453474153722e-05	Up
Spdef	3.33205408946424	3.60362940584073e-06	Up
LOC118568701	3.32894009322239	4.32916426433216e-05	Up
Cbr2	3.32213570602016	8.99331981941928e-06	Up
Trnp1	3.3178544256566	3.68930602348546e-05	Up
Tac1	3.31485068186612	0.000843675969138526	Up
Slc2a4	3.31092943747854	1.0896693106498e-05	Up
Tmem47	3.3084646947198	6.13799046420855e-09	Up
Snord49a	3.30656304874117	0.000749796971236566	Up
Fermt1	3.30489099800185	7.99614183625743e-05	Up
Hand2	3.30326872763193	3.22553536479862e-05	Up
Sectm1a	3.30127206016139	3.95021816614989e-06	Up
Slc22a18	3.30113902625385	0.000278693362845908	Up
Slc6a7	3.29430519661514	0.000132998432822048	Up
Elavl3	3.29278248467638	0.0055218484117333	Up
Ddx43	3.28591366143976	0.00513079617407815	Up
Hoxa10	3.28543558832932	0.00130317688576201	Up
Mgam2-ps	3.28536060535854	6.94352625589752e-06	Up
Slc39a8	3.28089077436829	2.79431121999576e-08	Up
Klf5	3.26866276198926	1.00076358454874e-07	Up
S100g	3.26864035571401	1.42296533490659e-05	Up
Spink4	3.26515591707608	1.08775078476649e-05	Up
Pkp1	3.26441656384723	3.42740521858234e-06	Up
Tinagl1	3.26423590642971	1.20940717905858e-11	Up
Hsd17b2	3.26187781366112	1.25905682602404e-06	Up
Prkg2	3.26052760715833	0.000160775089609354	Up
Prkaa2	3.2380050849971	5.71334210506194e-08	Up
Apol6	3.23678525710176	1.33387006126073e-12	Up
Samd12	3.23455007537976	1.52553698463336e-05	Up
Sult4a1	3.23281254131246	5.43333166027424e-05	Up
Nacad	3.22718132298507	8.76007333405469e-07	Up
Glt1d1	3.22613255876369	3.10779319035055e-05	Up
Jph2	3.22485137788348	0.000192301747176067	Up
Ppp1r3b	3.21903852448302	2.47641584846906e-09	Up
Ugt1a7c	3.21865750136713	1.40340672681446e-05	Up
Rasd1	3.21710483590135	0.000443776567748923	Up
Grhl2	3.21203006715287	3.45716760552115e-09	Up
LOC118567922	3.20621408217757	0.00182021148704933	Up
Serpine2	3.20249643775104	4.07820920012382e-06	Up
Prdx6	3.20199685051529	8.31929985159918e-09	Up
Nr1d1	3.19453817302416	2.64755034976135e-11	Up
Pla2g2f	3.19283134794594	0.00979919869445045	Up
Pkp2	3.19278952955572	3.00416945550413e-06	Up
Synm	3.19277281566804	0.000123615836259869	Up
Gas6	3.18879517722918	7.66467461495701e-19	Up
Mapt	3.18725433041725	0.000177664998084028	Up
Nrbp2	3.18567437860178	1.73920249843984e-11	Up
Ppl	3.17385689855469	0.000227143234778548	Up
Cpe	3.16953366927023	3.25214786613933e-06	Up
Aspn	3.16892348172779	1.35040379663915e-06	Up
Rhox5	3.16644713540575	0.00750114868299121	Up
Kremen2	3.15784969718044	2.94945403150012e-08	Up
Colgalt2	3.15304352854782	0.00240428708984916	Up
Areg	3.14996516868664	0.00135793824310388	Up
Tcf21	3.14758741028997	2.17486570157297e-07	Up
Zfp820	3.14455499706119	0.00120421838055146	Up
Slc26a2	3.14452977335258	3.16532926628813e-05	Up
Fgfrl1	3.14288740530855	2.76246219619502e-07	Up
LOC118567429	3.13472880350393	1.77234261539486e-05	Up
Ppargc1a	3.13445407999953	7.86532415237439e-13	Up
Klf9	3.13127442683443	2.67587392707117e-11	Up
C2cd4b	3.13068284544151	0.00683944758058927	Up
Dmd	3.12997462162877	1.56628345851762e-06	Up
Ugdh	3.12897547246723	1.11706165484537e-06	Up
Hebp2	3.12547162670513	1.71715484523363e-05	Up
Fzd3	3.1230686275594	0.000259156049159272	Up
Sh3gl2	3.12216282398075	0.000134969245193675	Up
Vcan	3.12188938780686	7.67640183779467e-06	Up
Stard10	3.11655749934559	1.39040576934791e-09	Up
Zfp618	3.11614746726771	4.40406942349167e-06	Up
Tmem45b	3.11613462151672	0.000364362217845475	Up
Ptprk	3.11442798359263	3.77303658303336e-16	Up
Mcrip2	3.11374191764181	6.23104049422931e-05	Up
Mmp15	3.11238654377685	6.37947405230899e-07	Up
Lrrc66	3.10882741476191	0.000830850856903634	Up
Slc12a2	3.10731774901353	1.59756612538895e-15	Up
Foxp2	3.10551564100641	8.99727315066958e-05	Up
Cela1	3.10457948025418	0.000112043591190456	Up
Slc9a2	3.09884995960158	0.000573933051241362	Up
Cnnm4	3.09802226496176	4.55823127599298e-05	Up
Paqr4	3.09658928296049	2.62583901192781e-08	Up
Elovl7	3.09524264467499	0.000201361471378455	Up
Akr1c12	3.09503357572241	1.42662282291341e-08	Up
LOC115488927	3.09436797485292	8.11752844563655e-05	Up
Zfp286os	3.08870764935788	0.000109791470573303	Up
Sqor	3.08732273589354	2.21818822931287e-07	Up
Pcsk6	3.08614187993553	0.00210057112923409	Up
Chst4	3.08575078110449	1.09030288760682e-08	Up
S100a6	3.07894476103202	8.15935237047019e-12	Up
Ptprn2	3.07872497762309	1.28940687313853e-06	Up
Fam83e	3.0782159192557	3.28497693625206e-06	Up
Grem2	3.07790155803837	3.54910968214183e-05	Up
Tcf23	3.07200830595774	0.00204880550314716	Up
Hunk	3.07045049016126	0.000451781987743538	Up
Krt18	3.06848906534443	3.71925940913965e-05	Up
Tpbg	3.06713287380497	0.000491338909231362	Up
Slc44a4	3.06667985711531	0.000479403158948434	Up
Inhba	3.06533248422312	6.55680299786949e-06	Up
Mt2	3.06518370838722	1.07485432805755e-08	Up
Nid2	3.06170853046486	0.00189040231936366	Up
Ptprd	3.05311248933468	0.00173639373065339	Up
Ank1	3.05102595014974	2.37520574506268e-05	Up
Bmp5	3.05039030572579	0.000375524114768732	Up
Prss8	3.04277170587265	0.000233662572565215	Up
Maoa	3.0378136339855	8.01896088183985e-08	Up
Cldn3	3.03470425233455	0.00119520509681626	Up
Boc	3.02824100107004	3.33234481325951e-07	Up
Hnf1aos1	3.02555624455368	0.000155555307338726	Up
Enah	3.02547353793278	1.01499294238301e-06	Up
Hacd1	3.02245729709458	6.32443903435433e-09	Up
Mical2	3.01891012696862	5.68079214554119e-09	Up
Paqr8	3.01890858370967	2.74593129598897e-06	Up
Sort1	3.01205646879477	2.66856561343217e-08	Up
Ano7	3.00793569258834	0.00175681807551496	Up
Magix	3.00690303426421	0.0109002508027673	Up
Galnt4	3.00598197731564	3.68734240462121e-17	Up
Gpr20	3.00587411264954	0.000670987424098574	Up
Adgra3	3.00582538647851	4.15612607071432e-05	Up
Gjb1	3.00295192343846	0.000187114782420025	Up
Capn8	3.00079161921075	0.00321261804235341	Up
Ms4a8a	2.9918942942802	0.000961988605783771	Up
Ngef	2.98014758895794	1.3831932504209e-05	Up
Hoxa5	2.97720519226203	2.45039909990426e-06	Up
Golm1	2.97434802185707	5.87731655629797e-08	Up
Slc40a1	2.97326446545524	1.00855604525616e-07	Up
Trpa1	2.97173309920323	0.0231429663359537	Up
Cyp2s1	2.9715099185442	7.52035422484737e-07	Up
Tpm2	2.97066891391926	3.09075079684021e-05	Up
Ccdc136	2.95413339323884	3.84893635908114e-05	Up
Fat4	2.95228812721491	2.93689774183516e-05	Up
Trpm6	2.95156105040817	0.00762570616552005	Up
Ak4	2.95133640785889	5.14750519746077e-06	Up
Echdc2	2.95101320414209	1.77041104381963e-06	Up
Foxd2os	2.95069938752086	9.95860576395343e-11	Up
Bmp3	2.94535687402995	4.64102956437951e-06	Up
Scamp1	2.94402899912275	7.728561322954e-08	Up
Pcsk9	2.9322337832655	0.0118909626504538	Up
Lrfn3	2.93208738946111	0.000143542606486036	Up
Slc27a2	2.93078121584022	0.00409876326941217	Up
Mboat1	2.92958583387303	3.08322562678379e-08	Up
Pir	2.92947570755001	0.00275745991038941	Up
Lims2	2.92914857318333	1.84503238380607e-08	Up
Prss27	2.92458849325648	0.00555522191714665	Up
Adgrg7	2.92370835758142	6.89940572715987e-05	Up
Sh3d21	2.92275008746444	2.0315067865768e-06	Up
LOC118567417	2.91994137583486	1.02219376988289e-06	Up
Nudt12	2.91991158727071	4.77587626078974e-05	Up
Pgap4	2.91811935578976	2.11980061360739e-06	Up
Cyp4f40	2.91761720650523	0.00334793553437898	Up
Ogn	2.91263660716061	3.40037967927893e-06	Up
Mal2	2.91024029777963	8.43779529150538e-06	Up
Wnk2	2.91004331868472	8.99092793692958e-06	Up
Ttll7	2.90941507469827	0.00660709568766576	Up
Pomgnt2	2.90553842580007	7.45722776822733e-05	Up
Podxl2	2.90220412017203	0.000212551875619909	Up
Mfsd6	2.90026376455499	9.71107103672556e-07	Up
Firre	2.90018352562433	6.8628477748268e-13	Up
Trpm4	2.89864392218116	0.000170890494768212	Up
Lgals3	2.89855036093857	3.60967534443915e-09	Up
Tmem51os1	2.89598917418739	0.00045687441113182	Up
Tmc4	2.89495444412016	5.22401764138911e-06	Up
Foxa3	2.88680296347084	0.000203347687343027	Up
Endod1	2.8853963270014	4.63945300898904e-18	Up
Bcas1os2	2.88313200661217	0.0167846937018622	Up
Epha1	2.88178073945188	4.27925900593771e-06	Up
Gpa33	2.88022181602017	0.00447970534323521	Up
Ubxn10	2.87959410083528	0.000160453374500747	Up
Uchl1	2.87499766513021	0.000633988303368051	Up
Ihh	2.87456875615278	0.00116610147007648	Up
Fhl1	2.87407879709951	3.18085913373844e-08	Up
Mrgprf	2.8718486467474	3.14316125913692e-06	Up
Ccl28	2.86989595900228	2.19978975760277e-05	Up
Klf4	2.8676755374166	2.28254756121138e-05	Up
Cacna2d1	2.86667972422195	5.66491542293914e-06	Up
Gal3st1	2.86498147178519	4.99925472851575e-06	Up
Gstk1	2.86380062913074	0.000499415607533526	Up
Adamts15	2.86120569539691	0.0007933822943587	Up
Nr1h4	2.85874849885032	0.00010039946704075	Up
Ugt2b34	2.85634631880074	0.00413605067012707	Up
Dnaic1	2.85545684092682	0.00233494493120524	Up
Rian	2.85431014005663	0.000198288186784604	Up
LOC118567589	2.85145356316034	8.49815712900565e-06	Up
Car9	2.85135168917948	1.49492354858211e-06	Up
Acta2	2.84760775457805	5.14689702055841e-06	Up
Hk2	2.84523566188072	1.78025338339897e-12	Up
Emp1	2.84335264957722	0.000134417895719376	Up
LOC118567859	2.84178230137695	0.00777002554312012	Up
Cd9	2.84154105734959	3.62932977593455e-09	Up
Inava	2.84049564118656	0.000164589148151852	Up
Usp43	2.84015400981148	1.82061928909595e-05	Up
Tsku	2.8394142629838	1.45867733382968e-05	Up
Sult1d1	2.83579944303475	0.000224485229351225	Up
Hoxb3	2.83547706326326	0.00012631597768254	Up
Ggt6	2.8353202056238	0.000647111633714108	Up
Slc25a34	2.83135540248148	5.15693902042786e-06	Up
Rdh16f2	2.83118512392911	0.0325923678706356	Up
Nlrp6	2.83024042673648	3.57984027782839e-05	Up
Acaa1b	2.82828908827987	0.00557322726585025	Up
LOC118568595	2.82542813716478	0.0116242098456627	Up
Tpmt	2.82424677223673	0.000814004440893162	Up
Nupr1	2.82237669035814	3.20210966843918e-19	Up
Slc45a3	2.82079723476722	5.7935853669871e-07	Up
Mt1	2.82057064879332	1.01132181227565e-11	Up
Tgoln1	2.81893056504657	4.54142932235485e-11	Up
Naip1	2.81812790217286	4.92177494056018e-06	Up
Kcnmb1	2.8144423856939	1.09543021131227e-06	Up
Csrp2	2.81439030540038	1.85443997709675e-10	Up
Creb3l4	2.81394937391801	4.23096971223618e-06	Up
Nr5a2	2.81052841916959	5.12838452115052e-05	Up
Sox9	2.80698804875267	1.52391000705238e-09	Up
Lmod1	2.80512740032047	0.00290635947623288	Up
Trim29	2.80431242767918	0.0257419891091669	Up
Gnao1	2.80217173467046	2.04071515390361e-05	Up
Bglap3	2.79991765856841	0.00693754750526468	Up
Retsat	2.79364372648606	1.94964330944529e-07	Up
Cldn2	2.79331970625416	0.000982655115188512	Up
AA467197	2.7928120504705	0.000117635053174152	Up
S100a16	2.78790952522741	1.03158825217472e-07	Up
Gprc5a	2.78734066546619	0.0083927942355406	Up
Tmprss4	2.78499632635764	0.00299155202630798	Up
Maml3	2.7824594090007	2.94412135992113e-06	Up
Sparcl1	2.7820723087742	5.08076732271869e-05	Up
Eppk1	2.77902961194783	0.000165796078016737	Up
Bace2	2.77680789175073	4.11400429832332e-14	Up
Pdlim3	2.77450209897504	1.38627592664883e-05	Up
Noxo1	2.77213806147458	1.03654470732374e-07	Up
Gne	2.7709897213564	9.29643601908778e-10	Up
Optc	2.76886446015178	0.00102350699415653	Up
Gstp2	2.76657995547151	1.56138284053534e-06	Up
Ttc39aos1	2.76380754693951	0.000278698641220395	Up
Fndc1	2.76109449191667	4.93002006186778e-05	Up
Hoxd4	2.75534300835803	0.00566920908280181	Up
Ppp1r1b	2.74968122285808	8.42888367362474e-05	Up
Flywch2	2.74903515164491	1.74989156144771e-05	Up
Prss30	2.74865828114724	0.000630330422861759	Up
Plcb1	2.74731116271457	3.1503117011323e-05	Up
Krt7	2.74479531777637	0.000106237836403673	Up
Des	2.74235350560998	3.08158693513735e-05	Up
Cnnm1	2.73835543002522	0.0254290558344883	Up
Id1	2.72750958304701	3.81193338573866e-05	Up
Phldb1	2.72613649019299	1.84773982297128e-18	Up
Cadps2	2.72313740327173	5.35799655717463e-07	Up
Btc	2.72266372708891	0.000204429110206999	Up
Klhl23	2.72146323946911	0.000507313953722281	Up
Acer2	2.71786810914048	4.10691259358159e-07	Up
Bmpr1a	2.71618548240488	1.99416189059658e-07	Up
Tox3	2.71575015313616	1.04337531494509e-06	Up
Asph	2.71407673921357	2.22190313501405e-07	Up
Zfp462	2.71364380849722	4.38668523163056e-06	Up
Tafa5	2.70939914658308	0.000797107802711754	Up
Slc23a3	2.70775054875073	8.26886537763657e-06	Up
Itgb4	2.70648753332804	0.000792635786277464	Up
Fcgbp	2.70494753251881	0.00598424804111835	Up
Mcam	2.70252362648154	1.39783941756148e-06	Up
Acsl3	2.70236711963269	1.74776454426647e-06	Up
Fzd1	2.70037117606845	8.29744799540023e-06	Up
Fgfr2	2.70019108759432	1.86017699273752e-05	Up
Spire2	2.69934247485101	3.68377460014047e-05	Up
Tead4	2.69796383706854	0.01173369845738	Up
Bmp4	2.69784639611708	1.94418021897065e-08	Up
Marveld3	2.69710041682239	1.67667862852523e-05	Up
Fbn2	2.69679736350799	0.00131768996107031	Up
Slc16a1	2.69605999064462	3.39315743908962e-11	Up
Mfsd13a	2.69534088910472	7.02998395280464e-09	Up
Wdr60	2.68706280280409	4.54649628756663e-09	Up
Cdx2	2.68612047598786	4.75326039035736e-05	Up
Stum	2.68423346192555	6.83237863909902e-05	Up
Rgma	2.68350442115998	0.000746703683502709	Up
Naip3	2.67510950327642	0.000449965668663746	Up
Tcea3	2.67161052413356	9.19721134807259e-06	Up
Ccdc106	2.66946231393276	0.00314961254626302	Up
Upk1a	2.66909169184575	7.80730036292106e-08	Up
LOC118568117	2.66861471799612	6.52561198279993e-06	Up
Rbpms2	2.66764741985608	0.000749824940405095	Up
Ccn2	2.6676251893033	4.51821358742901e-05	Up
Syn3	2.66716614411487	0.000251283661639878	Up
Hoga1	2.66499938669523	0.000354021359846138	Up
Fxyd6	2.66206626826277	7.36114855868247e-05	Up
Slc8a1	2.66007821831478	2.128791498543e-08	Up
Kcnk2	2.65961825338459	0.00257423095143044	Up
Papss2	2.65585608145266	5.910027608032e-05	Up
Sntg2	2.65344697796153	0.000398814946889008	Up
Tubb3	2.65320203912241	0.024420781162203	Up
Mpst	2.65306383315309	1.58505163072324e-05	Up
Cacna2d2	2.65099256865773	4.72444018059533e-05	Up
Lrp3	2.65057013534155	0.000789513960907001	Up
Phgr1	2.64997272046777	0.00010440600829576	Up
Eml1	2.64878914207049	0.000415990214989936	Up
Slc35f5	2.64845204696692	6.26087822813192e-05	Up
Lox	2.64664392043756	0.000478628831571687	Up
Plekha6	2.64571480664079	1.01611238595141e-05	Up
Large2	2.64049092180497	0.000179875811497331	Up
Cox7a1	2.63918612245925	0.0141962128322456	Up
Cmtm8	2.63744087711128	0.000327667593818012	Up
Rasef	2.63326281289188	0.000642442956593007	Up
Aqp11	2.63063458437945	0.00375732149478389	Up
Colec10	2.62930714826795	0.0256949488812481	Up
Smim6	2.62919566791929	1.07467308200163e-06	Up
Slc25a20	2.62432242989832	1.47534814009737e-10	Up
Srgap1	2.61976373103869	2.34694196839149e-11	Up
Tc2n	2.61957661992576	2.22547706124902e-07	Up
Cachd1	2.6187649171012	3.57037295886632e-05	Up
Higd1a	2.61840186651109	4.3073563630728e-09	Up
Mfap3l	2.61816691030136	0.000998763173937158	Up
Cald1	2.61608627213475	2.03639371506188e-07	Up
Scn7a	2.61027803863793	0.00056916103528765	Up
Hrh1	2.60987443615008	0.0408825203470784	Up
Perp	2.60911666906056	0.00184510314014607	Up
Tmem100	2.60701486844555	0.000375707771923011	Up
Neo1	2.6014606985924	0.000361233452027779	Up
Car8	2.60045207117567	4.20609117424767e-05	Up
S100a1	2.6002502905538	1.53981192866253e-15	Up
Rhbdl2	2.59817226705789	0.000704660360322496	Up
Chrm1	2.59610889488915	0.0340774557011215	Up
Bik	2.59606827210436	3.06537715101807e-05	Up
Gale	2.59090041514405	1.23976491131198e-06	Up
Hpdl	2.5906492051844	0.00442001229951924	Up
Sgpp2	2.58977535602807	6.58715826918855e-05	Up
Cblc	2.58901308145161	0.000227227971089976	Up
Myl9	2.58638318884736	0.000151959800360123	Up
Met	2.58611887309239	1.80462637748823e-06	Up
Arhgef37	2.58504965005049	3.1657356621015e-05	Up
Clmp	2.5845921170093	1.10170080399783e-06	Up
Pdk4	2.58307079175347	0.000166468306714522	Up
Tnxb	2.5828954214208	9.16143662582176e-05	Up
Itga2	2.58138860865104	1.78056776715131e-05	Up
Lgals4	2.58118882641257	0.000254888082833785	Up
Tcf7l1	2.58075964154492	1.94601481410238e-06	Up
BC016579	2.57864946313686	0.013831905046093	Up
Sytl4	2.57629104143359	9.62309755560031e-06	Up
Styk1	2.57419209652324	0.0114163823669018	Up
Ckmt1	2.5726587584612	0.00259180841955642	Up
Gna14	2.56780513703302	1.43619635853669e-07	Up
Vdr	2.56692057740233	3.20262232359404e-06	Up
Shroom2	2.5660801008386	1.03623013880966e-06	Up
Lad1	2.56605378606105	2.2047636393889e-09	Up
Olfml2b	2.56583211388677	8.480095388302e-06	Up
Gss	2.56516087857181	3.369865824187e-06	Up
Dnajc22	2.56397520235277	0.000188879526939872	Up
Akr1c13	2.56092059837289	5.70331894755597e-08	Up
Fads2	2.55791180578685	0.00118249730738382	Up
Abcb1a	2.55667424173543	0.0018332259992695	Up
Tm4sf20	2.55538897703381	0.0108739096348224	Up
Ccdc149	2.54111480581068	0.000394719885991217	Up
Plekhh1	2.53874926570991	0.000318466436109993	Up
Plat	2.53819405273343	0.00367689439008871	Up
Spry4	2.53587563526449	7.45265467753849e-07	Up
Txn-ps1	2.53428011749173	0.00360706319928669	Up
Kif1a	2.53420830201087	0.0250242390344378	Up
Clca3a2	2.53206692948312	0.0171709227712831	Up
Tln2	2.53105545585556	1.71948798377205e-05	Up
Tjp3	2.52727883444324	6.60823459585114e-06	Up
Adgrg1	2.52253504515883	1.0248972955764e-09	Up
Gstm7	2.52242392880222	3.19340207504311e-05	Up
Fer1l6	2.52190501385164	0.00262705396779609	Up
Sh2d4a	2.51972874601121	2.18712728003344e-08	Up
Akap1	2.51867417695406	1.78086603244434e-10	Up
Agt	2.51550410046581	0.000130509549076791	Up
Cd14	2.51288267367728	1.90580005090583e-05	Up
Zbtb7c	2.51171340104485	1.55819475136733e-05	Up
Anks6	2.51169141485786	0.00102575604166416	Up
Ripk4	2.50978861495391	0.00396530202025906	Up
Gpr82	2.50816541027135	0.00135052593947073	Up
Efnb2	2.50614614511815	9.77813711219916e-07	Up
Etv4	2.50597995446429	0.0054570252271973	Up
B3gnt3	2.50196342381145	0.00597437565910057	Up
Slc17a4	2.50121154826848	0.023868248718615	Up
Hoxa3	2.50106417030082	2.76482299778895e-07	Up
Bvht	2.50007815627942	0.000144661144803651	Up
Mgll	2.49977724367024	9.01348956607726e-08	Up
Pamr1	2.49944283786745	0.00438258707807024	Up
Mpzl2	2.49889339922136	6.87027244241777e-05	Up
Tead3	2.49840556762386	3.69962318803741e-09	Up
Agpat4	2.49814774919789	1.06306755744014e-16	Up
Ror2	2.49793093588603	0.00270884289631063	Up
Bag2	2.49624419738697	0.00331627801294449	Up
Trim46	2.49545244373178	0.000255568545943826	Up
Sdc2	2.4928292216986	5.22517489275104e-06	Up
Dagla	2.49249188941027	2.12081805240341e-06	Up
LOC118567733	2.48933004909108	0.00575325109730155	Up
Tacc2	2.48668451941087	5.82932131149232e-07	Up
Fam3b	2.48633399036914	0.00763356049468889	Up
Sptbn2	2.48395393095847	0.000143294495301492	Up
Fam162a	2.48360732258036	5.57047789100198e-06	Up
Tmem30b	2.48320319415767	0.00275071224618567	Up
Slc44a1	2.48176352067046	1.02634906134772e-10	Up
Atp8a2	2.48034027427469	6.24082459991835e-05	Up
Gucy2c	2.47883714807566	0.0185824217039937	Up
Snx24	2.47508402667758	1.98344366364386e-06	Up
Erfe	2.47427174069206	0.0217488793839819	Up
Atoh1	2.47390371596784	6.38768902745336e-05	Up
Serf1	2.47233123765965	6.81425807496359e-05	Up
Ednrb	2.46895375888206	4.75992659066801e-05	Up
Gli1	2.46412263820091	0.00120404019707782	Up
Fzd8	2.46361853804412	0.000199041315121115	Up
Ctbp2	2.46136634398332	7.91136846341374e-11	Up
Khdrbs3	2.46080901768541	1.9878608367371e-05	Up
Magi1	2.45977761692559	2.33980091004856e-05	Up
Pcsk1	2.45791574442623	0.0260042285412552	Up
Nrtn	2.45705441024017	0.00045349820534063	Up
Zbtb16	2.45613944392893	0.000370445398060109	Up
Pcp4l1	2.45608714541487	0.000569074601859855	Up
Tmem79	2.45574894479158	6.95644491612183e-05	Up
Baiap2l1	2.4553206883226	6.81143609799604e-05	Up
Syt7	2.45372523657418	0.00276141423893422	Up
Sgcd	2.45343761514087	0.0258570612503999	Up
Nbea	2.45275968577095	0.000373467187851748	Up
Ido1	2.45043123580988	0.00319942604578668	Up
Dhx32	2.4503633137017	2.08243096973952e-08	Up
Hoxb7	2.44828641090488	0.0103911887196183	Up
Ntn1	2.44639385559314	5.56314473673494e-06	Up
Slc35d1	2.4453399040629	0.000237877247789289	Up
Sdsl	2.44254494684517	0.000929910260088627	Up
Deptor	2.44098181163303	1.04439899463918e-11	Up
Omp	2.43821313349844	1.39844509084504e-05	Up
Kcnh3	2.43533476370944	0.000942652492794672	Up
Sdcbp2	2.43307687814597	6.61452474448932e-05	Up
Rgmb	2.43182242619979	1.22320208612953e-06	Up
Col3a1	2.42907296117059	5.13791894992175e-11	Up
Fzd5	2.42808826855483	8.74626535416947e-05	Up
Adamts4	2.42752923318248	5.48197483786366e-05	Up
Lrfn4	2.4274703345265	7.07051572515005e-08	Up
Ednra	2.42667278290192	9.11135915591261e-05	Up
Atp1b1	2.42336287443307	0.00550377687893306	Up
Ggh	2.41986840594365	0.000999562880832093	Up
Bdkrb2	2.41932648643493	5.77558495692791e-05	Up
Dtna	2.41847340694539	0.039618663383663	Up
Cds1	2.41685149961087	0.000502557893611608	Up
Bicdl2	2.41648646733784	0.00120580651470795	Up
Mgat4b	2.41640204730648	2.72578569019659e-10	Up
Fgf9	2.41600691903602	0.00444948953036759	Up
Rab15	2.41583025425552	0.000137059760616123	Up
Ift74	2.41501881914193	5.57191968157134e-05	Up
Cldn12	2.41367558761943	4.93204718963715e-06	Up
Lurap1l	2.4083011720932	3.31592079210664e-07	Up
Tcf7l2	2.40744877709042	1.27749071992788e-05	Up
Tmem98	2.40483490222379	0.000875440812785763	Up
Slc1a4	2.4039838167686	1.13638065004241e-07	Up
Ndn	2.40269444737724	0.00199692261323204	Up
Grtp1	2.4015412731011	0.000425922398770921	Up
Ndrg2	2.40038673069036	7.24497392667522e-07	Up
Bspry	2.40026727372043	8.12373249344343e-05	Up
Urah	2.39700489060948	0.0350763215062951	Up
Cables1	2.3936771731084	8.07343713181243e-05	Up
Atp9a	2.39152123661651	0.00102688582547459	Up
Epb41l4a	2.39016468032245	0.0359653330343556	Up
Abcb6	2.38854324558156	3.4353648388677e-06	Up
Egfr	2.38809648619512	8.04485449421077e-06	Up
Tmem181c-ps	2.38784421637399	2.25178067862849e-05	Up
Mapk13	2.38742853374983	0.00173371805326086	Up
Gpc3	2.38517329637434	0.00952950988976876	Up
Usp53	2.38366680041855	7.06440624504553e-10	Up
Apol10a	2.38236249200436	0.000754651812439615	Up
Hhip	2.38157653902238	0.000502981789916075	Up
Foxq1	2.37603698946196	0.00125617742718083	Up
Slc35a1	2.37598727253812	1.44895896322474e-08	Up
St3gal3	2.37569731068675	4.95117863095468e-07	Up
Rap1gap	2.37553155254842	5.62356135014961e-08	Up
Ccbe1	2.37527734154237	0.00584488615432949	Up
Pafah2	2.37165670544853	2.96115536991011e-07	Up
Tpsg1	2.37086910995286	0.00290487385147033	Up
Postn	2.36557375458466	9.57469863785468e-07	Up
Nkain1	2.36528878542684	0.00259326450769552	Up
Myo1d	2.36515818699063	0.000197098688589047	Up
Cracr2b	2.3639493850785	0.000316063499124253	Up
Ctxn1	2.36339417192944	1.35389212955667e-05	Up
Anxa1	2.3622879922595	3.31909493087614e-05	Up
Cdc42ep5	2.3620337644259	0.000750362037437857	Up
Tmem44	2.36066885077187	4.30264820361317e-05	Up
Elf3	2.35933842980201	0.00362907113726126	Up
Cyp2j6	2.35810998189752	0.00300430437407192	Up
Ano10	2.35809656459627	3.07231721470594e-05	Up
Lmln	2.35626029199429	0.000101704225583007	Up
Ampd3	2.35578647436082	3.04312095106698e-09	Up
Col6a3	2.35574563513287	2.99545681134945e-13	Up
Ctse	2.35467428301286	0.0106400791793654	Up
Gata6os	2.35358569144092	0.0284001295864147	Up
Krt8	2.35228146104291	0.00115387918152778	Up
Cyb561	2.34975241854531	0.000253562659957758	Up
Tlcd3a	2.3490646939636	1.9241507893281e-06	Up
Galnt7	2.34893358808564	1.52386855427514e-09	Up
Ptgfrn	2.34605169785951	4.0221020425465e-06	Up
Smim31	2.34489334348344	0.00754880849020125	Up
Clstn1	2.34430799081346	4.28479450351228e-07	Up
Ttc6	2.34412601560992	0.00214294335305975	Up
Misp3	2.33774334167576	0.00252122731341971	Up
Ccdc116	2.33710444521892	0.000259263646209731	Up
Tgfb2	2.33572362496449	0.000516555770250614	Up
Frk	2.33308937088886	0.00637245842478253	Up
Dusp9	2.32864750479217	0.0321518778028744	Up
Ces2c	2.32861109145986	0.00185862926149705	Up
Glp2r	2.3280208017018	0.0207605119913452	Up
Pglyrp1	2.32768472978108	0.000172319577305267	Up
Dmpk	2.32657583894454	2.31670286814778e-05	Up
Lrp4	2.32475966010854	9.06750457103931e-05	Up
Thsd4	2.32470191785105	0.000134814041651123	Up
Hes1	2.32466592856925	2.92168641073446e-10	Up
Ap1m2	2.32372144616094	4.49132601092388e-06	Up
Arhgap5	2.32353792771738	3.83058219388043e-06	Up
Col5a1	2.32266982209734	6.83671616188693e-10	Up
Ptp4a1	2.32155877760484	5.19008604772924e-07	Up
Thrb	2.32143082717103	6.61383999445513e-05	Up
Appl2	2.32113355825535	1.47965267759646e-09	Up
Plekhb1	2.32038742345083	0.0074394173044801	Up
Ckb	2.31893898689145	5.69488336355059e-07	Up
Fuom	2.31885229314022	1.90489104149244e-05	Up
Efna1	2.31836303149672	0.00147031564907783	Up
Itga3	2.31693835819823	0.00829572041734268	Up
Naip6	2.31506197756223	0.00241941965620565	Up
Zfhx3	2.31455411233959	6.27929058828021e-09	Up
Acvr2b	2.31424154018521	1.2139621449312e-05	Up
Sema5a	2.31396094391893	5.36830719082041e-06	Up
Tmem253	2.31379245610745	0.00746498898130465	Up
Ret	2.31373645928244	0.0439982751371708	Up
Cracdl	2.31344170113241	0.00110140505702484	Up
Ckm	2.31336623618987	0.0101844912086908	Up
Gulp1	2.31329996061081	0.0125939469532835	Up
Bmp7	2.31326082578759	9.35679407682484e-06	Up
Mfap4	2.30674223500919	0.000796356898087191	Up
Spry2	2.30562541571185	0.000236731269767908	Up
Tent5b	2.30549219306858	0.0184461591817557	Up
Vsig2	2.30385898121132	0.000311152013819715	Up
LOC118567348	2.30368889444727	0.0241280127827286	Up
Gas1	2.30277069889829	7.15152880114891e-05	Up
Aig1	2.30230014697943	6.22951799215375e-09	Up
Btbd3	2.30127075180346	3.53765557081043e-07	Up
Kctd15	2.30081494273924	0.00563018143747454	Up
Hr	2.30041882020617	3.08712306203464e-05	Up
Tmem119	2.29929435479392	4.16242634555856e-06	Up
Tle1	2.29681321467144	2.75786833788704e-08	Up
Plekha8	2.29640723596768	2.34887684488255e-05	Up
Sh3bgrl2	2.29571217688314	9.99377876351077e-05	Up
Angptl7	2.29352992130052	0.00349124473038523	Up
Sel1l3	2.29336804556001	0.0108374402642472	Up
Cisd3b	2.2927471094966	0.000354550825127497	Up
Lzts2	2.29249430844663	1.74390373287816e-10	Up
Slc6a9	2.29186372965829	9.99299941594417e-06	Up
Tnc	2.29027198727236	6.22842072356893e-05	Up
Ncald	2.28640908386385	0.000876329449625438	Up
Sema3b	2.28620421767883	0.000559829216372559	Up
Gtf2ird1	2.28577644277619	8.08615887693802e-09	Up
Rab27b	2.28559478126666	0.00507687306101142	Up
Lrrc3	2.28518933755866	0.000185790091980181	Up
Cdcp1	2.27996242503907	0.0103136110967195	Up
Bbof1	2.27964819361985	0.00275322234234245	Up
Vsig10	2.27828582518462	9.99135263326834e-07	Up
Kdelr3	2.27798165713528	9.33723123512044e-05	Up
Ncam1	2.27562629878057	2.96256279859406e-05	Up
Mcpt1	2.27534436106998	0.0100574246863113	Up
Hpgd	2.2733363491458	3.07421142887212e-07	Up
Ufsp1	2.27327626173818	4.8269500963342e-05	Up
Krt8-ps	2.27036638573257	0.00329265950019471	Up
Acads	2.27000698512213	1.50951057662224e-06	Up
Capn5	2.2699453062873	1.46138000674954e-10	Up
Fkbp9	2.26891789213716	2.10660314774541e-05	Up
Trim6	2.26879043297363	5.18144567952239e-06	Up
Afg1l	2.2659792604583	2.21669774011921e-07	Up
Cnksr1	2.26462015709985	0.00767095105173424	Up
Gjb2	2.26426967669971	0.0362414204777424	Up
Camk2n1	2.26003037478816	0.00450443666522435	Up
Wscd2	2.25810443862707	0.00494873978855808	Up
Vipr1	2.25794443696755	2.44434779038013e-06	Up
Cep170b	2.25695109629037	1.18806729574244e-06	Up
Saa3	2.25612194078214	0.00685193087638267	Up
Capn9	2.25350986045245	0.00202921673652343	Up
Peg3	2.2530237177145	0.00507736938267094	Up
Tns1	2.25229546780908	2.10664275492018e-05	Up
Etl4	2.24931357547323	1.85268594027022e-05	Up
Amot	2.24892799039301	2.46492549570791e-05	Up
Pxdn	2.2458936461137	9.75500804194012e-08	Up
Golph3l	2.24577875362488	2.34545428356851e-08	Up
Spats1	2.24507736840967	0.00922694864116469	Up
TrnL1	2.24441684832812	0.0443954276144921	Up
Acot11	2.24423230058811	2.8826756007805e-05	Up
Prr15l	2.24086832450311	0.00516320922611767	Up
Ppfia3	2.24081735996306	0.00521040582293769	Up
Slc39a11	2.24043401529964	8.10626671477395e-07	Up
Sdr42e1	2.23728585637464	8.54329169443253e-08	Up
Aldh1a1	2.23669163756475	0.00315668058780212	Up
Tyro3	2.2366848832855	0.018800446474212	Up
Smoc2	2.23519865375288	0.00473101866995144	Up
Ereg	2.23487275539423	0.00966682179593151	Up
Itga5	2.23458741492903	2.37937461300703e-06	Up
Wnt5a	2.23269026131727	0.00111509626951167	Up
Plce1	2.23206651708801	1.78146324662731e-08	Up
Rab3d	2.23197661853387	9.24696980805016e-10	Up
Fam234a	2.23147636037929	4.54073381625316e-05	Up
Gpi-ps	2.22926025181335	0.00760150804417953	Up
Ddah1	2.22684461214227	4.08948162236541e-05	Up
Ankrd9	2.2266077477727	5.24242368417951e-05	Up
Cap2	2.2263529426642	0.0257163431635118	Up
Tpm1	2.22631043980857	4.4413950545056e-05	Up
Pacsin3	2.22611622242581	5.35635133445358e-05	Up
Sorbs2	2.22371843055634	6.72560381395553e-06	Up
Fam135a	2.22340028234487	0.000202715180881671	Up
Hspb1	2.22336405033085	0.000119182059266604	Up
Scamp5	2.22268961072799	0.000484427302561638	Up
Engase	2.22065134521486	2.50490366118957e-06	Up
Unc13b	2.21904497985045	0.00104306707050509	Up
Nr1i2	2.21874198321535	0.00309940210407923	Up
Egflam	2.21619604361065	0.0019483418455863	Up
Plekha5	2.21607282853176	1.15280708672323e-14	Up
Vcl	2.2159863801807	6.7727514563925e-07	Up
Plxna2	2.21420834189444	0.000235479486401013	Up
Evpl	2.21352696168542	0.0039427649948147	Up
Abat	2.21336762740358	0.00147385147504803	Up
Acad11	2.21243105388672	9.81308236026707e-07	Up
Rnasel	2.21057413925442	1.60953105399142e-07	Up
Cth	2.21049344311435	0.00703108742031025	Up
Fam171a2	2.2063709983921	0.000325357330826633	Up
Ccdc68	2.2063489766852	0.00152545909971693	Up
Map1a	2.20606234046518	3.98725225902037e-05	Up
Cpd	2.20569542319272	1.08716139537131e-06	Up
Unc5b	2.20496025838142	0.000832167173426819	Up
Smad6	2.2035073441756	0.000410980049260666	Up
Acnat1	2.20263556757415	1.5622337138845e-05	Up
Hacd4	2.20149323421184	0.00318781141613846	Up
Cilk1	2.20003878152785	2.25348110201274e-06	Up
Cdc42ep1	2.19854650001872	4.35075903158123e-06	Up
Rtl1	2.1978349074136	0.0422745640089628	Up
Fgf12	2.19738029893155	0.0296069325287509	Up
Clybl	2.19585511128192	1.87821569742469e-07	Up
Ahcyl2	2.19562651499044	3.43436834890151e-05	Up
Rilp	2.19553538408217	0.00437976266859755	Up
Lipg	2.19502071175522	0.00100225086380376	Up
Radx	2.19496064577773	0.00842626336399587	Up
Adgre1	2.19257841243326	0.00179657013708249	Up
Vwa8	2.19220629731604	2.41506939237367e-12	Up
Cux2	2.19008481325213	0.0162442129291741	Up
Ephb4	2.18946311513079	5.78915578491668e-11	Up
Insyn2a	2.1883318758296	1.63792703662094e-05	Up
Cped1	2.18589412144416	0.000320799980728258	Up
Pcbd1	2.18568714552409	0.000431675449650355	Up
Vdac3-ps1	2.18511788827023	0.00013543979504296	Up
Dpt	2.18457094233943	1.16046238936814e-09	Up
Hrc	2.18231807610836	0.0151752606651318	Up
Rnf39	2.18230759290463	0.00177708627475925	Up
Cadm4	2.18178055736844	0.00403755801323317	Up
ATP8	2.18130886797141	0.00401841490117405	Up
Dag1	2.17707646668558	1.784467045203e-05	Up
Bche	2.1758623033375	0.00457933526040215	Up
Wnt4	2.17564222181173	0.00365363889950365	Up
Camsap3	2.17509488322986	0.0071535433389319	Up
Mcf2l	2.17466126376755	0.00156203295279145	Up
Chga	2.17095951650853	0.0205037294462039	Up
Gstm5	2.17036427327562	0.00310972228290344	Up
Ryr3	2.17018085762237	0.00547751429783569	Up
Cbr1	2.16876771009693	1.66711752352758e-07	Up
Tril	2.16809339890036	0.018466033931825	Up
Nhlrc3	2.1676810881277	0.00595848943405447	Up
Dsg2	2.16737104705388	0.00536165412143151	Up
Dst	2.16652916466829	1.82292436776602e-09	Up
Kcnma1	2.16551177285829	0.000737657381626262	Up
Cyp39a1	2.16493600648183	0.000164689124149874	Up
Fam160a1	2.16383744286487	0.00012836816287837	Up
Epb41l4b	2.16373083935673	0.00211793351357837	Up
Arhgap20	2.16268329965948	0.00084192305058169	Up
Myo7b	2.16262021441168	0.0241808741723197	Up
Chac2	2.16184775163279	0.00226611758418403	Up
Fbxl22	2.16166635311769	0.000281350944809841	Up
Sh3yl1	2.16086387649743	0.000451789631068168	Up
Ptgis	2.15732964147376	0.000382447713722153	Up
Ptpn3	2.15464843348849	6.40403582848425e-05	Up
Tmem82	2.1545796774162	0.00196186193640819	Up
Rasd2	2.15392208222185	0.00297943022510732	Up
Pappa	2.15369730123343	0.00371281407753556	Up
Slc22a21	2.15298996351726	0.000693203867523259	Up
Slc2a1	2.15119308958923	3.03830901025476e-09	Up
C5ar1	2.15039173811953	0.0035375069526563	Up
Hsd17b14	2.14810902723103	0.00963087837075462	Up
Vangl1	2.14792030949192	0.00151854507046252	Up
Tgfa	2.14782700499258	0.00230481887483725	Up
Magi3	2.14628144366244	0.000150407429283063	Up
Tom1l1	2.14430657349673	0.000204109627447343	Up
Gsta3	2.14415290292793	0.00463853680142149	Up
Tnk1	2.14369765152866	0.000627303270693874	Up
Muc3	2.14286492939967	0.0391389314467348	Up
Ccdc9b	2.14186817450533	5.49139203765479e-06	Up
Trim36	2.14141650926832	9.40666337170664e-05	Up
Etv1	2.14115889919654	0.00416562412677787	Up
Ophn1	2.14110750668832	2.69300834897555e-05	Up
Kank1	2.1408984168567	8.95937256609274e-07	Up
Psd3	2.14081177563623	2.61711710084187e-07	Up
Pla2r1	2.14033410470094	0.00435165101536248	Up
Utp14b	2.14025121838311	1.67327815241151e-05	Up
Ank3	2.13816409681677	0.000779396989288224	Up
Lrrc51	2.13670613512718	5.31873397714159e-07	Up
Zfyve9	2.13593019331706	0.00020928911246466	Up
Apoo	2.13565584127983	3.78078107002471e-05	Up
Hepacam2	2.13493697792938	2.09399492084336e-05	Up
Adtrp	2.13487875041041	0.0303066844989671	Up
Mid2	2.13346404388101	1.13221119088987e-07	Up
Pde9a	2.13318125788879	0.00326710564281564	Up
Art3	2.13316603402176	0.0101001212187447	Up
Mfsd7a	2.13183516304807	8.07344365402439e-09	Up
Plagl1	2.13158664613111	0.00201418764038045	Up
Fxyd1	2.12896838825218	6.51486537300316e-05	Up
Mpzl1	2.12681104269127	2.17164823354608e-07	Up
Srd5a1	2.12538073617621	0.001915465865198	Up
Ptk7	2.12513961779595	1.10159870477496e-09	Up
Nnmt	2.12438956215247	0.0108408087193769	Up
Hnf1a	2.12301745202357	0.00340922794683978	Up
Phlda2	2.12212740832324	0.0123695863012219	Up
Gsta1	2.12146292448705	0.00109622066578493	Up
Tspan8	2.12027383228987	0.0315770022868378	Up
Fam83h	2.11697996530023	0.00866943056968662	Up
Dip2a	2.11689867131671	1.50662688411677e-07	Up
Dixdc1	2.11657494814053	1.75624939188416e-05	Up
Itgb6	2.1164440646552	0.0253618447659866	Up
Muc1	2.11563494397096	0.0076987779849035	Up
Wtip	2.11545006875127	1.72003826300161e-05	Up
Plek2	2.11502804264244	0.0323306244943528	Up
Mab21l2	2.11493443436655	0.00737739131064205	Up
Hcn2	2.11228402030711	9.53007000399588e-06	Up
Lrig1	2.11225221277718	1.27895770767863e-05	Up
Gpr27	2.1121240010685	0.0271238825056116	Up
Rgs5	2.11187199253832	3.89834219858067e-05	Up
Fbxo32	2.11005245565433	1.16138919231165e-05	Up
Col18a1	2.10660971404545	3.31825636293014e-05	Up
Pla2g2a	2.10546428324008	0.0103505341461331	Up
Tspan2	2.10426408874931	0.000378803396626552	Up
Dock7	2.10403212136854	1.42314620482151e-09	Up
Niban2	2.10393305100182	1.20345275125086e-07	Up
Mlph	2.10346916486396	0.000225171730670918	Up
Mylk	2.10259151262643	0.00179122204522077	Up
Srpx2	2.09913711856285	0.00164085220652323	Up
Mtus1	2.09875135454628	4.61856500186615e-05	Up
Foxf2	2.09816403487027	0.00998930130476439	Up
Ift43	2.09508944715025	1.68723155342713e-06	Up
LOC118568007	2.09183453583366	0.033621145628196	Up
Col6a2	2.09165378072291	4.1690115178603e-09	Up
Rhpn2	2.09061809095861	0.00264053062710497	Up
Sgsm3	2.08708631589332	6.41513262457883e-09	Up
Pcgf2	2.08656568891247	5.69923997642282e-09	Up
Cd59a	2.0855140418999	0.00048908252690191	Up
Trim72	2.08531741372105	0.00102763078839465	Up
Lmna	2.0832723420658	0.000107310226130469	Up
Sdc1	2.08309471338043	2.52781658923806e-05	Up
Nexn	2.08190805495451	0.00684142690490835	Up
Col5a3	2.08100792553933	0.000419280082042845	Up
Fam83c	2.07716490036707	0.0330154694131614	Up
Lrp1	2.07714660717058	0.000115895844458004	Up
Insc	2.07267443770471	0.0179258224814876	Up
Lhfpl2	2.07053707031901	0.0176116092935278	Up
Pcp4	2.07038330044478	0.00260233887103008	Up
Ppara	2.07032943318988	0.0152279869517169	Up
Tspan15	2.06838526256901	0.00937846391942822	Up
Pdzrn3	2.06636483798925	0.000211335042129358	Up
Mpp3	2.06570024383175	0.00629603970678698	Up
Slc7a4	2.06499169022819	0.000111009850923824	Up
Ndrg4	2.06495040310213	0.00281900577017861	Up
Tppp3	2.05974215114639	7.29169920311002e-05	Up
Thpo	2.05960420874648	0.0242489378947208	Up
Suclg2	2.05937519402555	2.01818366802792e-07	Up
Sema3a	2.05911316342594	0.00309715022909348	Up
Cttnbp2	2.05697315901258	0.00957711021755437	Up
Cdc42bpa	2.05672165117361	8.53960496732354e-07	Up
Slc4a2	2.05504327685931	2.40828024979268e-06	Up
Cxcl14	2.05361773644514	0.00998461140303874	Up
Lrrc49	2.05315259847289	0.000100858248006096	Up
Mtus2	2.0521639045288	0.00800227656635814	Up
Nsg1	2.05165737336927	0.00830412892633671	Up
Ppp1r12b	2.05110508228009	0.00151745701787258	Up
Kitl	2.05108636783345	1.69414987086023e-07	Up
Rims1	2.05068651645442	0.0370979008822581	Up
Ttc39a	2.05039463621325	2.74189738407294e-05	Up
Tspan12	2.04935587193082	7.19343436039606e-06	Up
Itih5	2.04922728834421	0.000127552582622615	Up
Lnx1	2.04840102444258	0.0122741205901091	Up
Slc22a23	2.04656107420412	6.17557131596738e-05	Up
Synpo2	2.04424891131696	0.000331421678996513	Up
Mir100hg	2.04341091964359	0.026627817611093	Up
Ctdspl	2.04220617092023	2.18652387372918e-06	Up
Igdcc4	2.04022909861094	5.14083568106593e-06	Up
Nes	2.0398414391896	0.000217331308461189	Up
Tnfrsf11a	2.03731499628477	0.000513021910691577	Up
Ptprg	2.03723645035598	1.55575465232645e-06	Up
Pde5a	2.03698220337192	0.0136642150569001	Up
Iqsec2	2.03618121748001	0.000103754771118329	Up
Arhgdig	2.03566471660782	0.0215796392025643	Up
Gpt2	2.03455999448251	5.58309831042802e-06	Up
Tmem200b	2.03266960884308	0.0230667414082252	Up
Strc	2.03258303118959	0.00930242501428176	Up
Tfdp2	2.03168135669987	6.68876951820514e-06	Up
Card10	2.02841628994061	1.5363926726173e-09	Up
Stard13	2.02742811788911	4.06071252177846e-06	Up
Arhgef16	2.02685124389329	0.0120597160149342	Up
Tmem254a	2.02511459638606	6.24873144944588e-07	Up
Id4	2.02493856717208	0.000455677924412287	Up
Snord13	2.02425959826795	0.00489275839668365	Up
Gipc2	2.01965241158877	0.0127982813270531	Up
Tgfb1i1	2.01955611763644	5.58386217840889e-06	Up
Samd4	2.01932835269476	0.00213600927820523	Up
Dcxr	2.01853228768736	6.34182653050425e-06	Up
Dsc2	2.0182163503301	0.0160344465095408	Up
Zfp536	2.01590466198763	0.00338909024271216	Up
Tmem37	2.01565302253008	0.00824250251582464	Up
Ache	2.01486852733272	1.13332621907428e-06	Up
Tlr5	2.01232994822279	0.00861941411732228	Up
Vwf	2.01208506984853	0.00137340317993668	Up
Selenom	2.00866657925072	1.31124700178169e-05	Up
Farp1	2.00778159068064	3.59140251999509e-07	Up
Itga6	2.0076645433455	4.04071350527531e-06	Up
Nav2	2.00740889108949	0.0003150841314262	Up
Homer2	2.0056182147655	0.00023893478054014	Up
Ddr1	2.00417859744699	5.9676663379308e-05	Up
Sprr1a	2.00310129306403	0.0443085768373423	Up
P3h2	2.00275476289125	0.00717247664495266	Up
Mob3b	1.99849544454346	1.535648397834e-05	Up
Dsp	1.99829138319893	0.00914692192084354	Up
Adk	1.99772919664849	3.95742017882241e-06	Up
Galnt3	1.99680890605344	0.000835168024000562	Up
Atp6v0e2	1.99655413750008	0.00697754460460797	Up
Cpt1a	1.99246043886899	1.33862022088625e-07	Up
Celf3	1.99199335042045	0.00632058769300061	Up
Vipr2	1.99196489168897	0.0334816768376449	Up
Disp2	1.99180565311711	0.0468322514614326	Up
Arhgef39	1.99148267546941	3.36967627834091e-06	Up
Cc2d2a	1.98972186643455	0.000268738805397477	Up
Smagp	1.9882609716387	5.87498021814904e-06	Up
Atp1a1	1.98740546569857	7.01902255910411e-05	Up
Liph	1.98738358903028	0.0245149147227511	Up
Dact2	1.98676807251966	0.000756889818534466	Up
Fendrr	1.98662447136733	2.80028694873717e-06	Up
Slc35c1	1.98649742897493	6.93243213245674e-07	Up
Sh3bgr	1.98564829979706	0.0466806875141331	Up
Frat2	1.98505040810163	1.86584341536369e-06	Up
Phf21b	1.98428672392093	0.000853522674354165	Up
Grb7	1.98395755851965	0.0265864605183349	Up
Igsf5	1.98323056826175	0.0467321192359375	Up
Golim4	1.98143919819522	3.57311275944835e-05	Up
Fam171a1	1.98028707332994	0.000668969064167892	Up
Fbxw9	1.97617658009578	3.6557098260343e-05	Up
Angptl2	1.97604927837835	0.000967949226357835	Up
Btnl5-ps	1.97467055124638	0.0220690446842749	Up
Mgat3	1.97327258893751	0.0183791210390522	Up
Bpnt2	1.97312820784691	1.05100392831875e-08	Up
Rerg	1.97132135680313	0.0263626506659859	Up
Pitx1	1.97055484118277	0.013972875191307	Up
Zfp704	1.96977624447981	5.71875073754511e-06	Up
LOC118567918	1.96977185662998	2.0305480738886e-07	Up
Igf2bp2	1.9694235541521	0.00140635051802852	Up
Plpp2	1.96899950706072	0.0192288784104368	Up
Rusc2	1.9678161791484	0.000175423973649794	Up
Timp3	1.96318063320351	4.9113332097491e-06	Up
Kif21a	1.9627479893906	0.00212226092946105	Up
Arhgef19	1.96092507416353	0.0417925320306199	Up
ND4L	1.96092002713458	0.00878081478066864	Up
Gask1b	1.9603973296229	0.000540925969566198	Up
Mlkl	1.95914441119494	5.21903190749109e-07	Up
Dusp8	1.95838597375284	0.00709631066165476	Up
Micalcl	1.95822416463331	0.0329103263725132	Up
Oaf	1.95567172905728	0.000453737949590474	Up
Nrp2	1.95134352136581	4.44791678203257e-05	Up
Tff3	1.9497285884992	0.0400771447946293	Up
Ryr2	1.94883896041284	0.0331646331923027	Up
Sct	1.94767744065459	0.0410602564567666	Up
Afdn	1.94642911619836	0.000954112360736403	Up
Cox7b	1.94611281686784	2.30905007127314e-09	Up
Dapk2	1.94579419548763	0.000204117910723355	Up
Tnfrsf12a	1.94443825255051	0.00328601055393454	Up
Metrnl	1.94343944161989	0.00397299000491078	Up
Epb41l1	1.94048016521015	0.00221350912816426	Up
Kif26a	1.93856189077613	0.0137046208974514	Up
Hnf4a	1.93775717377986	0.00641433911808586	Up
Nek1	1.93499168892157	3.58068276249236e-05	Up
Stk38l	1.9348978302349	1.53891657413184e-05	Up
Dact3	1.93276015207639	0.000586144561157037	Up
Sgms2	1.93101442490253	0.0378680181179929	Up
Slc25a13	1.92868074158299	3.58059642016177e-07	Up
Myorg	1.9246894671448	0.00470883523960269	Up
Afap1l1	1.92438386779006	0.000449505086408426	Up
Shroom3	1.92414994907729	0.0151812692793561	Up
Tmem25	1.92331576015578	0.00578715548541255	Up
Drc3	1.92298734108701	0.0140968700176031	Up
Acvr2a	1.92253953677551	6.23871718350545e-05	Up
Plp2	1.92032150323928	0.00037841480398465	Up
Cpped1	1.91858753442616	5.48987850431488e-07	Up
LOC118568708	1.91858206546165	0.00181516443402929	Up
Vldlr	1.91672095387878	0.00133758689197962	Up
Arhgap32	1.91645826400512	7.26440501270387e-05	Up
Rtn2	1.91209496732106	0.00105659758409996	Up
Pdxdc1	1.9101286587528	2.98809599314938e-06	Up
Ppa2	1.90983304935052	2.39237087280013e-09	Up
Hoxb2	1.90854930370635	0.00126606142773401	Up
Enpp5	1.90786789191673	5.97863565808084e-08	Up
Pld1	1.90732751204674	0.000508165497548955	Up
Ctnnal1	1.90589136125247	0.000159320229191319	Up
Ppp1r3c	1.90422260663477	0.000125748779985879	Up
Parva	1.90297581471742	2.80747944997048e-08	Up
Sppl2a	1.89977645085957	2.49502303950364e-07	Up
Crb3	1.89717007182465	0.0227341660562405	Up
Myo19	1.89663109951511	0.000238163697346025	Up
Gsto1	1.89583704140997	8.27867106825258e-05	Up
Flnb	1.89353566884827	7.89418511464929e-05	Up
Il17rc	1.89311455174601	0.0332609103579017	Up
Trim31	1.89271536277565	0.024671417318471	Up
Tubb4a	1.89206699563342	0.00857420937735648	Up
Cntnap1	1.89156520183215	0.00364908641306859	Up
Nectin2	1.88824086620427	0.00345266915699348	Up
Chp1	1.88684681285846	5.3280228357451e-05	Up
Gjc2	1.88344437737875	0.0319212013105379	Up
Adgrl2	1.88225926932966	7.57479111492948e-06	Up
Crispld2	1.87922868108412	0.000122451249187053	Up
Sectm1b	1.87823391877667	0.0470232684305216	Up
Ramp1	1.87757551573281	3.93057568172845e-06	Up
Bdh1	1.87742750016877	9.73082826337741e-07	Up
Pon3	1.87695884020626	3.03595539313616e-06	Up
Ptges2	1.87585829717017	2.08521813283387e-05	Up
Ppip5k1	1.87521936552931	9.50355678707996e-05	Up
Palmd	1.87513423233298	0.00120628212550305	Up
Nrg1	1.87448123589469	0.0408299000012151	Up
Jup	1.87442734434756	0.00486954888661479	Up
Mrto4-ps2	1.8730358612391	0.0304232632394942	Up
Cmtm4	1.87218176268068	0.00186945885015697	Up
Pip5k1b	1.87214237553625	0.0058634568179004	Up
St14	1.87197460086922	0.00395141468506774	Up
Llgl2	1.87161266596923	0.000402599574844597	Up
Specc1	1.87080854350742	0.0010463826511162	Up
Hspa4l	1.87052176602777	0.00123151418248542	Up
Slc4a7	1.87045487998897	1.20412510458552e-05	Up
Spint2	1.86998091761608	0.0107030897744638	Up
Kcnq4	1.86918929486338	0.0311685181646025	Up
Myocd	1.86847575948147	0.00452876591087699	Up
Car11	1.8649626758781	0.0352941912251334	Up
Mtmr11	1.86377463328358	0.0173221345162095	Up
Nrep	1.85929404983494	2.67288190816921e-05	Up
Sfrp1	1.85906122519368	0.000271561950154333	Up
Palld	1.85870529230282	0.000178808594544899	Up
Hsp25-ps1	1.85866960890164	0.00497200369577737	Up
Cdkn1c	1.85848511012664	0.00210734889052054	Up
Cep290	1.85770639507349	0.00429730670154875	Up
Sema6c	1.85586532474033	0.00431715171647729	Up
Cdc42ep4	1.85570278338472	5.7266458650834e-05	Up
Pxylp1	1.85568018480988	2.15041319141708e-06	Up
Tead1	1.8532701837037	1.50936873961848e-05	Up
Slc39a5	1.85238786047604	0.00619942911045415	Up
St6galnac2	1.84963678619287	6.75177804078644e-07	Up
Pcdh18	1.84666073835083	0.00132770805003757	Up
Ttyh1	1.84639410314237	0.010361340349114	Up
Lrrc42	1.84622406316828	7.01365720042803e-10	Up
Pf4	1.84489032298509	0.00311006784922414	Up
Ctnnd1	1.83944676512978	0.00553987263813284	Up
F2rl1	1.83874749584054	0.000281185745167993	Up
Matn2	1.83759253224548	0.00126755967622008	Up
LOC118568744	1.83748431027951	0.0365719568259035	Up
Syt8	1.83724509452192	0.0324146791060638	Up
Mtfp1	1.83601891894769	0.00283457075973976	Up
Hspb8	1.83576771847669	0.00430080151727762	Up
Ets2	1.83539733995659	0.000303246494383592	Up
Gata6	1.83272515047836	0.00085011979188956	Up
Fuca1	1.83257281862382	4.30621993491297e-06	Up
Ndufab1-ps	1.83218794440356	0.0290805461258631	Up
Tmem54	1.83184625978162	0.00999027792130441	Up
Jam2	1.83184300271512	0.0047622531011962	Up
Slc35g1	1.83117670738424	0.000793225307555625	Up
Pgm5	1.82932068485951	0.0214704859690705	Up
Atrnl1	1.82867867952143	0.000143153375703095	Up
Iqgap2	1.82830619733143	0.000860256872426168	Up
Gfpt1	1.82782022078045	0.000221085480233449	Up
Fzd2	1.82572798697375	0.0059616732556967	Up
Micall2	1.82515219545318	0.00191756420578626	Up
Mapk3	1.82496908009842	0.00158179393341657	Up
Snhg18	1.82471027370779	3.31215629754917e-08	Up
Dusp18	1.82380428543008	0.00658762823768014	Up
Entpd5	1.82354796959632	4.73583486398114e-05	Up
Pyroxd2	1.8232522466365	4.25332381294675e-05	Up
Atoh8	1.82315177630327	0.00107920923421867	Up
Uqcr11	1.82140537243815	8.97660267166452e-07	Up
Dcbld1	1.82074232405398	0.0186432910850384	Up
Fermt2	1.8200410892655	0.00106498045749284	Up
Cadm3	1.81961048812584	0.0432988604453778	Up
Arhgef5	1.81723643844535	0.00307328169159738	Up
Mill2	1.81669713304752	0.000144054174636805	Up
Ndrg1	1.81648027166305	0.000407742956926844	Up
Mfap2	1.81566431017982	0.0165149144081018	Up
Zfp946	1.8154008335507	0.00190306991892302	Up
Neurl1a	1.81490211917476	0.0496440071248114	Up
Rell1	1.81404663148029	0.000742576851348371	Up
Itpka	1.81163729786463	0.0254566521910186	Up
Gssos2	1.81110687975549	0.0108275392777792	Up
Tmtc2	1.80919807335284	1.59877643799161e-05	Up
Arl1	1.80885379412172	7.86484251446013e-07	Up
LOC118568315	1.80718719033374	0.00260418259200106	Up
Cdkn1a	1.80700250883499	0.00517662747576304	Up
Cisd3	1.80673070859248	0.000550870837890159	Up
Ica1	1.80599020661336	0.00671625370437158	Up
Gstm4	1.80290598881238	0.00184267198950427	Up
Fbln2	1.80101853780189	0.000364114463209586	Up
Cd248	1.80078600949955	0.00310158307806654	Up
Myo1b	1.79853560080526	1.65960294357318e-05	Up
Nckap1	1.79471440570949	0.00102916490754805	Up
Kif16b	1.79450771394875	0.000856361764992444	Up
Cav1	1.7943238432456	1.96817168666859e-05	Up
Tbc1d32	1.79356514769374	0.00159952405481405	Up
Kdf1	1.79309298355749	0.029716875368715	Up
Eea1	1.79003091465261	3.76484876357794e-06	Up
Tjp2	1.78892597960672	0.00451585551572039	Up
Tmem158	1.78888745656473	0.000236160072237945	Up
Parp16	1.78809214781944	9.40329649886039e-05	Up
Prune2	1.78691972867174	0.000822992877775701	Up
Gcnt2	1.78598172153566	0.00860891980719193	Up
Nedd4l	1.78467801770383	1.18417705559153e-05	Up
Igsf3	1.78349533762516	0.00236366193826735	Up
Lama1	1.78297841877861	0.0435749859314615	Up
Wnk4	1.78271997354613	6.98287782817758e-07	Up
Creb5	1.78006688942871	0.00395267102543225	Up
Ugp2	1.77924327895287	2.46202775395146e-05	Up
Rhbdf1	1.77849720513276	5.57690500134526e-07	Up
Sorbs1	1.77764794742573	0.00122706417970707	Up
Cystm1	1.77684874323207	0.0159311786189717	Up
LOC118568450	1.77505868067367	0.00280089333306047	Up
Pgap3	1.77302373569001	0.000258216186262723	Up
Col12a1	1.77258358991767	0.000431865352921309	Up
Pdgfa	1.77218199344489	6.43890026322708e-05	Up
Kcnk3	1.77177499504537	0.00182291733129418	Up
Scd2	1.77066215531816	0.00186718020746255	Up
Gstt3	1.77012187488885	0.000733694172950212	Up
Ccl6	1.77003576058167	0.00130304005730888	Up
Rac3	1.77002837707209	0.00244545439830865	Up
Fgd4	1.76922331268189	0.012204355248236	Up
Slc13a3	1.76866056464909	0.0481474570896987	Up
LOC118568660	1.76552463884972	0.000661188719239181	Up
Plekha7	1.76538400308019	0.000157682246119045	Up
Daam1	1.76506495019221	2.73267068100131e-05	Up
Slc16a5	1.76500492707788	0.000425781136290847	Up
Zfp9	1.76468682222725	0.00308590880483105	Up
Col6a1	1.76304401688258	2.4738415449578e-05	Up
Bsg	1.76259326267115	3.1996630569432e-05	Up
Chchd10	1.76216708148442	1.06763799863349e-05	Up
Gpr35	1.75858269053954	1.20898816749722e-05	Up
Cpne8	1.75684587047746	0.000442494835217001	Up
Zdhhc1	1.75661837687805	7.06431484621957e-06	Up
Cox6a1	1.75560842912249	4.66223040215135e-05	Up
Arhgap21	1.75521212231502	0.000582079399841407	Up
Krtcap3	1.75463371789358	3.47176765784136e-07	Up
Foxl1	1.75357766359686	0.0199652917365485	Up
Eps8l3	1.75261256788094	0.00824209491425144	Up
F2r	1.75256506862746	0.000108876656047779	Up
Nkd2	1.75185052318284	0.0318555710671391	Up
LOC118567825	1.75126392952589	0.000769397424331038	Up
Rgs17	1.75085521964391	0.012642393344865	Up
Neurl1b	1.75026489099943	0.000731324889967124	Up
Ddx60	1.7469203154361	0.00893522762235475	Up
LOC118567640	1.74515506071334	0.0233438411725178	Up
Ly6c1	1.74502207137501	0.0169546345167026	Up
Elovl6	1.74388935773317	7.56396239691855e-05	Up
Nhsl1	1.7415157922888	0.00413158183615361	Up
Sned1	1.74084750024088	0.00210441007646438	Up
Luzp1	1.73972247343794	0.00207399785083179	Up
Dok4	1.73935240084247	0.0145028220711049	Up
Rflnb	1.73835486671005	1.7120762710313e-08	Up
Gnpnat1	1.73809835063071	2.35434918472013e-05	Up
Zfp939	1.73795447454942	0.00280735948198439	Up
Slc25a24	1.73784123915807	0.00244871742169709	Up
Mcee	1.73770279045333	4.22153655091723e-05	Up
Thbs1	1.73733730634559	0.00186762967798649	Up
Sult1b1	1.73657924449533	0.0259554238221602	Up
Sestd1	1.7359563264433	1.68162206208142e-06	Up
Abhd6	1.73519472748037	0.00335634035777489	Up
Sema3f	1.73511279472647	0.000234532344254638	Up
Enho	1.73508876003368	0.00627297108355355	Up
Pbx1	1.7346737811953	5.38986150837325e-06	Up
Cdh13	1.7334690666956	0.000341384422174303	Up
Elmo3	1.73244129725343	3.92995913278481e-07	Up
Gcc2	1.73191824254778	5.5986316479603e-09	Up
Zfp37	1.7302147904386	0.00555249285603859	Up
Pank1	1.7294547642817	0.000221495404091866	Up
Mpp6	1.7290038896681	0.0207256628955985	Up
Tax1bp1	1.72873960720508	1.82894556949205e-08	Up
Cisd1	1.72725877729503	1.31342772984461e-06	Up
Cdhr1	1.72599507908332	0.0386698892394003	Up
Map7	1.72505195213493	0.0039038167594059	Up
Gpx2	1.72496777290294	0.0311306146062558	Up
Pik3r3	1.72428198109363	4.73994376405072e-07	Up
Rassf7	1.72263437182108	0.0197572533710085	Up
Fzd6	1.7214993879815	0.0165554002385816	Up
Septin10	1.72148020055303	0.00116631332054376	Up
Ece1	1.72103484521317	2.03897818408137e-09	Up
Abcd3	1.72061354368521	0.00166753010736006	Up
Dzip1l	1.72047881577931	0.0477706266729872	Up
Mmut	1.72037225710173	8.91285620115254e-07	Up
Sv2c	1.72012292239203	0.0244661815470076	Up
Fut4	1.71997631127161	0.0473079582003173	Up
Sdc4	1.71924590349816	1.31234421539789e-07	Up
Dlg5	1.71809921988341	0.000335207864522026	Up
Ncoa7	1.71751084917295	0.00946261250404632	Up
Filip1	1.71694130289305	0.00459185368273092	Up
COX3	1.7165495406888	0.0303819121628432	Up
Hoxd9	1.71615491122279	0.0224901711679077	Up
Pawr	1.71532036913031	1.8046627910288e-05	Up
Fam210b	1.71507579320875	0.00362399992267122	Up
Clec4a2	1.7142088933535	0.0151436015102941	Up
Upp2	1.71414172234378	0.0229719951909803	Up
Nol4l	1.71001066342872	0.010409305467935	Up
Cd151	1.70873980636738	0.000177091601189205	Up
Prkar2a	1.70854584096463	0.00136482289671081	Up
Cox7a2	1.70463795798286	5.54069708176411e-05	Up
R3hdm4	1.70392944988752	1.91597265037805e-07	Up
Il13ra1	1.70389566455012	0.0257985069509034	Up
Ltbr	1.70293305567325	7.56857687882921e-05	Up
Tcaf1	1.70253080353547	0.00255449228514682	Up
Plscr1	1.70028700004503	6.73964575060974e-05	Up
Uqcrb	1.69928512932139	9.12312935006717e-06	Up
Slc35a2	1.69860917313483	0.000336913930768886	Up
Pfkl	1.69848499176503	0.00320511745010175	Up
Ackr3	1.69815389670248	0.0129711560120484	Up
Kank2	1.69633038836463	2.59788524763413e-05	Up
Pard3	1.6961758580434	0.00528850403249867	Up
Fam83d	1.69551586381237	0.00473951041625503	Up
Ermp1	1.69451128472914	8.68287680545083e-06	Up
Tsc22d1	1.69423912022587	0.000419785869785921	Up
Tmem252	1.69345300911269	0.0143473064911844	Up
Tmbim1	1.69327377773396	0.0103954924357026	Up
Pgam1-ps2	1.6919013462444	0.00286867200683358	Up
Nat14	1.69170124041119	0.000626901841529867	Up
Tlr2	1.69079533718495	7.92683972932871e-05	Up
Bbs1	1.69075654795343	0.0212039954429158	Up
Arhgef10l	1.69016666357807	6.34097464913099e-06	Up
P2rx2	1.68963843179622	0.0239155292965236	Up
Oas1g	1.68860322862473	0.00827250905455641	Up
Slc18b1	1.68763732783201	0.0442804946084582	Up
Plod2	1.68592133513936	0.00327629732349452	Up
Sytl1	1.68485482568992	0.00349557147740042	Up
Map1lc3a	1.68299695197068	0.000152470440266444	Up
Card14	1.68217641970865	0.0320735130677983	Up
Zbtb42	1.68102799728804	2.35467770705002e-06	Up
Reep2	1.67896149634014	0.0413673815090025	Up
Uqcr10	1.6781574794397	4.17831985415663e-06	Up
Zfp111	1.67610257265789	0.00420520645954467	Up
Cacng7	1.67547211043166	0.00136619738785591	Up
Lrrc1	1.67441004664132	0.00220926418824053	Up
Ech1	1.67426176275892	8.45281800840326e-06	Up
Ptgs1	1.67410860462934	0.000111838700901366	Up
Yes1	1.67383050257292	0.0099892800501188	Up
Ppp1r14a	1.67237169960788	0.00017698711569637	Up
Slc25a35	1.67214392611813	7.3373824217825e-07	Up
Cd99l2	1.67142041102084	0.00100819076082432	Up
Lamb1	1.67129617854371	2.68545829598661e-06	Up
Macrod2	1.6705628644733	0.00288956117669185	Up
Ppm1e	1.66888488602129	0.0124804640455009	Up
Kif13a	1.66884798451715	0.00141003056089097	Up
Phf11d	1.66855718069364	0.00380159254999183	Up
Nbeal1	1.66770054956256	0.00297140908015514	Up
Rgs4	1.66646563116659	0.0208353295120508	Up
Prrg2	1.6663625752551	0.00103109456612828	Up
Irs1	1.66525563393666	0.0181660442385763	Up
Crybg2	1.66450813034053	0.0245827068644988	Up
Pccb	1.66327778139565	4.74251058565002e-07	Up
Col16a1	1.66324726336075	0.00854459097204536	Up
Il1rn	1.66135058813098	4.44134303054981e-05	Up
Higd2a	1.66108277064572	5.06541828359418e-05	Up
Glis3	1.66081603195122	0.0124271885729695	Up
Hdhd3	1.65990556295609	0.016784352823991	Up
Dhrs3	1.65987054396963	0.0016332861336426	Up
Foxf1	1.65933887931869	6.94652385939252e-07	Up
Shpk	1.65845902322596	0.000766526753602778	Up
Per3	1.65840908429333	0.000879558619070136	Up
Alas1	1.65794207325685	2.9417343791737e-06	Up
Efnb1	1.65732913938821	0.0127557401075859	Up
Rbp4	1.65664836632136	0.0048619492289534	Up
Aldh5a1	1.65633050418755	0.0113311517833378	Up
Hk1	1.65551198384457	2.94041878182517e-09	Up
Col1a1	1.6549105179781	0.000101660843027742	Up
Casp1	1.65377164425695	3.22764801247778e-06	Up
Pdlim7	1.65324298467029	0.000112617028687862	Up
Abhd14b	1.65203321275983	2.39778563444138e-05	Up
Tmem205	1.65157388201277	1.36079745806607e-06	Up
Gnai1	1.64772780130649	0.0023243680007181	Up
Rph3al	1.64725352939147	0.00135474370699354	Up
Ppard	1.64707280065985	0.000159965661751384	Up
Pex11a	1.64688517811355	0.0118924400390504	Up
Plekhh3	1.64664910426785	0.0180339381761589	Up
Eps8	1.64660033333848	0.0151152147302871	Up
Rin2	1.64638448886973	6.53416248640997e-07	Up
Kcnj8	1.64487175709449	0.00953979600883958	Up
Ier3	1.64399075434298	7.08362051821855e-05	Up
Tmem63b	1.64358528436983	3.48490086917226e-07	Up
Bsn	1.64264477785357	0.00185370449768047	Up
Cox6b1	1.64226361727965	3.68926387155981e-05	Up
Pck1	1.64088609463992	0.0444954408051331	Up
Lpp	1.64052397424036	2.52451501555059e-07	Up
Acy3	1.63890984847735	0.0229208064286164	Up
Krt80	1.63614749470593	0.00616183017599471	Up
Ank	1.63480361521615	0.000269634366492624	Up
Acvr1b	1.63430568600178	3.55132388542743e-07	Up
Golgb1	1.63417217749885	1.14994431626978e-07	Up
Lzts3	1.63270068033084	0.00276756438810828	Up
Plac8	1.63159740159194	0.000238342677224791	Up
Slc5a3	1.62993456788181	0.0013651174550536	Up
Nans	1.62939841218065	0.00110028473030926	Up
Klf3	1.62927843807765	0.000185432322124445	Up
Gan	1.62830864245976	0.0378283312692518	Up
Ro60	1.62791864137671	6.58572998549579e-05	Up
Cryl1	1.62708214761613	0.0127015755927793	Up
Napepld	1.62593377439675	0.00219790415649762	Up
Batf2	1.62572194340263	0.0139226246349788	Up
Adam22	1.62350807611744	0.0468562298735199	Up
Peli2	1.62241375134109	0.00158762581430783	Up
Mgst1	1.62222121238919	0.000384397305343152	Up
Thra	1.62165010952086	8.71963481907806e-05	Up
Tjp1	1.62164423430686	0.000525770045123021	Up
Thap4	1.62149035787496	4.45857078033628e-05	Up
Fat1	1.61985667407732	0.0410798419780687	Up
Hook1	1.61786403325086	0.000291453129258339	Up
Stx3	1.61764660071957	0.0254806127330517	Up
Slc25a10	1.61524038802187	0.00341915294251284	Up
Cask	1.61481486352252	4.11710971264159e-05	Up
Hbb-bs	1.6130360230579	0.000544457321767696	Up
Rock2	1.61255372957991	6.63337162500983e-06	Up
Prpsap1	1.6123803128089	0.00170099693623236	Up
Tnfrsf21	1.61159472996682	0.00112210059985605	Up
Pkdcc	1.61156811972437	0.000176098874149401	Up
Ifit1bl1	1.61136209438148	0.00245159283264516	Up
Sh2d6	1.61130905369264	0.0314703614526212	Up
Reps2	1.61067397838197	0.0498888982493796	Up
Tm9sf2	1.61007948426601	0.000358820950713342	Up
Snx7	1.60856089927048	0.00640020307184833	Up
Fcgr4	1.60696057868434	0.00730822697041144	Up
Cox5b-ps	1.60589619894788	4.45211616835543e-07	Up
Spry1	1.60561662734229	0.000945061671044538	Up
Slc35a3	1.60487292506393	0.000851045013093635	Up
Atp1b2	1.60399844452979	0.0112435187224751	Up
Pwwp2b	1.60347293675022	0.0338508280879548	Up
Dysf	1.6013857492281	0.00585462375508826	Up
Spats2l	1.60136949680058	0.0251785571741962	Up
Prkci	1.59864336856432	1.95415483359601e-05	Up
Nid1	1.59765943905149	3.32417577429349e-05	Up
Rnase4	1.59666882472152	0.0303914215391505	Up
Sgsm2	1.59651064711189	0.000119002178109575	Up
Rbm47	1.59630711612181	0.025374940641888	Up
Csrp1	1.59618041225089	9.04188490499973e-05	Up
Pmm2	1.59334506725534	2.02902543033766e-05	Up
Ttc38	1.59327710002059	1.65601854007058e-07	Up
Myadm	1.59284206164014	2.61594622275395e-07	Up
H2-Q10	1.59181364127273	0.000228768670972837	Up
Lrrfip2	1.59166817520956	0.000135144528679556	Up
Col5a2	1.59094586475648	0.00010286675324855	Up
Bcorl1	1.59075860238732	0.00026850442902403	Up
Lamb2	1.58963153610095	0.0183977195905377	Up
Atp5g1	1.58912662541146	1.95303024440489e-05	Up
Spred2	1.58712185414051	1.10484495415831e-07	Up
Epb41l5	1.58690582980154	0.00750786961267214	Up
Eci1	1.58668428527399	2.16689808502158e-05	Up
Gstp-ps	1.58497599215776	0.000415816923886576	Up
Ssx2ip	1.58418044335074	0.0324032447022613	Up
Cpt2	1.58384838589589	0.00415656815822549	Up
Dock5	1.58371726248031	0.00392849910080345	Up
Dock6	1.58329105813817	0.00148792569903688	Up
Mest	1.5824794602348	0.0178521022718702	Up
Mrvi1	1.58105889407981	0.00981494197208091	Up
Ginm1	1.58067290296406	3.80273685353549e-05	Up
Zfp623	1.58058794317204	0.000125553238503573	Up
Btbd8	1.58004886942467	0.00472575782826127	Up
Gja1	1.5796328453585	0.00559947713779606	Up
Daam2	1.57878099926669	0.000377408528596588	Up
Mxra8	1.57795507892823	4.2672492206587e-06	Up
Apod	1.57706628484124	0.0119487334577555	Up
Ppp2r3a	1.57505669542745	0.00299251978872907	Up
Fam174b	1.56894041376523	0.000353573898314782	Up
Tmcc3	1.56824805252023	0.00550149924530705	Up
Mtmr7	1.56696179896584	0.020980872370601	Up
Pdlim1	1.56674727075927	0.00106615611145582	Up
Sigmar1	1.56600292245747	5.42420744437586e-05	Up
Map1b	1.56523425427794	0.0131257255006762	Up
Ralgapa2	1.56463676042917	7.81488269936877e-05	Up
Casz1	1.56198916704966	0.0196789964951213	Up
Mtm1	1.56147106057648	0.00282471002713797	Up
Dbi	1.56079323210047	0.00123385469222484	Up
Ptk2	1.56026108969775	5.42713344977372e-06	Up
Ctsf	1.5579162627694	0.0300632382738731	Up
Dab2ip	1.55542828638067	0.0020759983881577	Up
Svil	1.55536229699126	0.000649162097865525	Up
Lgalsl	1.55347072538654	0.00263266744035201	Up
Caskin2	1.55328689046401	0.000682585821785429	Up
Fbln1	1.55262285843479	0.031302413120374	Up
Eif4ebp3	1.55126643549529	4.08641767690408e-05	Up
Arl4a	1.55087265402812	0.00195092184465626	Up
Tm9sf4	1.55016084048244	0.000746309500554519	Up
B4galt4	1.54823623941103	0.00443557221745076	Up
Evi5	1.54428783470083	2.43369044888398e-05	Up
Naga	1.54425769827376	6.06491496184388e-06	Up
LOC115486414	1.54424071539043	0.018767438871998	Up
Antxr2	1.54372830626822	2.27895388636502e-05	Up
Pygb	1.54257105528331	3.01756414073309e-07	Up
Fam83f	1.5423340901205	0.00154133607629139	Up
Dgkh	1.54136914178671	0.000401942940558255	Up
Adcy6	1.54067147064538	6.2698058642336e-06	Up
Mgst2	1.5399906186666	2.01939434680056e-08	Up
Acvr1	1.53976010034141	0.000623965727000677	Up
Fhl2	1.53970850411111	0.00335250558279372	Up
Msrb3	1.53957693118446	0.000915283611336442	Up
Prkab1	1.5395144276211	2.5128296134625e-05	Up
Zfp467	1.53951086900796	4.27145833236462e-05	Up
Cpq	1.53932200656387	0.00172519542381749	Up
Fer	1.53901782776884	0.00122928663039639	Up
Trp53inp2	1.53713525842081	0.000336895544859768	Up
LOC118567874	1.53695896990744	0.0447920256032651	Up
Acsf2	1.53621047924936	0.0112473986948028	Up
Pak1	1.53606124884717	0.00196606751155125	Up
Dcbld2	1.53584673396259	0.0158365199146937	Up
Mpp7	1.53564461817336	0.0139800872731118	Up
Stra6l	1.53382001027884	0.00814913801567873	Up
Fos	1.53373857200386	0.0386951354191389	Up
Zdhhc13	1.53305771572656	8.49261422219631e-05	Up
Synj2	1.53300728724521	6.00381182473068e-05	Up
Vdac3	1.53205766014113	3.78806870968282e-06	Up
Prdm16	1.53102673105156	0.00667826325570952	Up
Mustn1	1.52953684052929	0.000329609935073548	Up
Hba-a1	1.52867837639484	0.000830504204178476	Up
Nkd1	1.52782151592336	0.0019987533086454	Up
Cox7c	1.52697456008399	4.77837184935017e-06	Up
Dram2	1.52568123428242	4.3032858000887e-06	Up
Tcaf2	1.52512276502949	0.0072405334532997	Up
LOC118567823	1.52502279242345	0.00310452117378676	Up
Cryz	1.52464205250066	0.0224083857167723	Up
Islr	1.52233593757798	0.000983762913220824	Up
Abhd4	1.52173135583198	0.000467240676494752	Up
Lima1	1.52162205019381	0.000197544285001146	Up
Ift81	1.51893703900907	0.024019598730597	Up
Mfap5	1.51877923747971	0.0241258629292599	Up
Cdc42bpg	1.51769480115122	0.000359779127450971	Up
Trip10	1.51656179220817	1.47782531896091e-05	Up
Cfl2	1.51613286591799	1.29281285593353e-05	Up
Aldoa	1.51409835122233	2.41113222185951e-05	Up
Gng8	1.51325526976142	0.0429861961227289	Up
Oplah	1.51148786918278	4.96971915820569e-05	Up
Casp7	1.50958668077167	0.00445500409517101	Up
Naip2	1.5084045849413	0.00154600294257908	Up
Cuedc1	1.50727756199515	0.00258973245061122	Up
Nfe2l2	1.50714687985746	0.000589796108812682	Up
Smpdl3a	1.50558772539011	8.13313161497901e-05	Up
AI661453	1.50542698986003	0.00804609335947216	Up
Tspan9	1.50418373716252	0.00396239031582586	Up
Sytl2	1.50411319852692	0.00568437809695118	Up
Thnsl2	1.50247408318678	0.0166605937439039	Up
Yap1	1.49882297440743	0.000140352581627052	Up
Dclre1a	1.49723114172605	0.0128832084628978	Up
Acaa2	1.49632587682684	0.000110896829856587	Up
Eif2s2	1.49618313842702	5.5268398757684e-06	Up
Scin	1.49577741224283	0.00635813471453794	Up
Adcy5	1.49354843790667	0.00889191623351851	Up
Pxmp2	1.49345982549057	0.00981021035289351	Up
C77080	1.49330395225833	0.0333567687086933	Up
Aldoc	1.49266099602911	0.00139905190957793	Up
Arfgap3	1.49101099015253	0.00381292625118567	Up
Mul1	1.48951156518326	0.0030359214246549	Up
Mvp	1.48948499493951	5.17287086714402e-05	Up
Fhit	1.48938471841025	0.0480583135058033	Up
Rap1gap2	1.48933907978651	2.84184877110186e-05	Up
Serhl	1.48788350431696	0.0016147461125172	Up
Gpsm2	1.48661289637017	0.000411259197558778	Up
Ndufb9	1.48627412101065	1.55146401947527e-07	Up
Nudt4	1.48598009960139	0.0192608848227897	Up
Thbs3	1.48574198858101	0.0348605779320075	Up
Cmas	1.4849410395433	4.45925112381543e-05	Up
Atp5o	1.48453027659479	1.6235234140544e-05	Up
Spef1	1.48317385181055	2.27849627607975e-06	Up
Rspo3	1.48116281427674	0.00981157440104274	Up
Pde1a	1.48070213131203	0.014294078453493	Up
Tmco3	1.48044136637028	0.00173904513974181	Up
Atpif1	1.48001852347669	4.5463545359139e-05	Up
Slk	1.47875224695013	3.00475218554065e-07	Up
Fam114a1	1.47864984564907	3.89818191872073e-05	Up
P2ry6	1.47649744518546	0.0128814932817939	Up
Utp20	1.4759493097315	0.001102694494655	Up
Txn1	1.47484942694925	0.000923663345279983	Up
Prkcz	1.47467511298044	0.0300139521749594	Up
Cox10	1.4746585098013	8.89505534262186e-05	Up
Rundc3b	1.4745691105872	0.00276627752035713	Up
Akap7	1.4743589431629	0.00389858475718048	Up
Ccser1	1.47306557816109	0.0134645218099012	Up
Tpd52-ps	1.46971329809703	0.018505922742575	Up
Sh3tc1	1.46965411111656	0.00031454020554829	Up
Tppp	1.46916671148704	0.0328292960000367	Up
Pam	1.46902025155075	0.000414875997621689	Up
Hspb6	1.46853321520573	0.00974706963821497	Up
Bahcc1	1.46821364118783	0.00659221886172256	Up
Farp2	1.46807187289603	0.00153227737611777	Up
Gstm1	1.46732142125637	0.00533738855746561	Up
Mark1	1.46703420408555	0.0301371035848498	Up
Mir22hg	1.46566335963289	0.00466371777727686	Up
Dock1	1.46556421599555	0.0030836854791874	Up
Col27a1	1.46464623189663	0.00824857833581997	Up
Yipf6	1.46456129157758	0.000402609977507223	Up
Fblim1	1.4629238831064	0.00414952152019993	Up
Agap1	1.46130136910489	0.0020497408266621	Up
Cttn	1.46103668933611	0.0136500827370514	Up
H1f0	1.46086556139913	8.40155582009646e-07	Up
Ryk	1.46064027756913	0.000745075025358806	Up
Ndufa6	1.4590529624477	7.5077934359742e-07	Up
Dnmbp	1.45837520132666	0.00128983316149529	Up
Ahnak	1.45799552674574	0.0106013534407632	Up
Plcb3	1.45695960098521	0.0224457994413681	Up
Lama4	1.45683003592914	0.00398370849103324	Up
LOC118568607	1.4566008477754	0.0253226725378286	Up
Plpp3	1.45658554294318	0.0040400691447408	Up
Idh1	1.45565803041594	0.00245922129708352	Up
Tent5a	1.45513275382101	0.000752622698810181	Up
Mb21d2	1.4545328189897	0.0101510832495717	Up
Dqx1	1.45339038065253	0.0230501076952209	Up
Ak3	1.45318803294358	0.000321869823297167	Up
Tmem141	1.45260181206432	0.0351167953179864	Up
G6pdx	1.45157680195587	0.00141542106542396	Up
Itgb1	1.45112102088113	7.22999619094271e-08	Up
Raph1	1.45095324194185	0.0237170373239792	Up
Dstn	1.44760933710651	0.0273704120408832	Up
Mrc2	1.44724848217266	0.0105373310599843	Up
Ppargc1b	1.44694973934925	0.000899785355036138	Up
Lmbr1	1.44686756016093	0.00106427657237598	Up
Mpv17l	1.44591024598073	0.00951843408580736	Up
Acox1	1.44489267453609	0.023528235605876	Up
Mier1	1.44409373462092	0.000284256882122667	Up
Cox5b	1.44409252867952	4.33141805394382e-07	Up
Fstl1	1.44343866147223	0.00038352988377899	Up
Sco1	1.44310964975286	0.0035487268661794	Up
Hook2	1.44275863510316	0.00692211010028253	Up
Abcc10	1.44264550823652	5.28460056816994e-06	Up
Abca9	1.44227767699078	0.0137855053507475	Up
Cenpv	1.44190503656471	0.0071375998616697	Up
Glo1	1.44135765790903	1.65034850327462e-05	Up
Eef2k	1.44092009770014	0.00558302597983365	Up
Ndfip2	1.44034557961907	0.0151286920995481	Up
Atp5d	1.43814927826191	8.70445497839611e-05	Up
Srgap3	1.43746909406187	0.0391445565474817	Up
Rassf6	1.43711936127362	0.00194882234453952	Up
Ndufb8	1.4367170151282	3.83501374934166e-07	Up
Npdc1	1.43643688069663	0.00113540178620762	Up
Prkra	1.43593081670494	0.000613146884682154	Up
Hint2	1.43578821796074	2.40639960196077e-05	Up
Ssc5d	1.43559186414512	0.000355955686894196	Up
Camkmt	1.43527066398078	0.00038268504440558	Up
Tpk1	1.43471580124594	0.0298319617087078	Up
Plpp1	1.43335949947053	0.000804122151169204	Up
Lpin3	1.43150181419995	0.0346406516194106	Up
Fbn1	1.43139711371011	0.00433792744354643	Up
Dip2c	1.43107677603052	0.0100251894738057	Up
Cox8a	1.43037898033768	0.000279343956922365	Up
Mettl26	1.42903626517753	3.98452469831865e-05	Up
Cers6	1.42857912052768	0.00181093619849365	Up
H2bc4	1.42851705113879	0.0199558877625002	Up
Gstm2	1.42825461304809	0.00761919470225209	Up
Spryd7	1.42804395127464	0.00613487105950021	Up
Lrp6	1.42628555474942	1.82668609444583e-05	Up
Pxmp4	1.42568969095602	0.000435068201298466	Up
Tm7sf3	1.42546894911034	0.000836156390676106	Up
Ehbp1	1.42544409050475	0.000881743661915764	Up
Pi4k2b	1.42477418584669	0.00436080415329543	Up
Slc35e4	1.42422480486535	0.0328204529646812	Up
Hba-a2	1.42416144215513	0.00238945793245857	Up
Cacna1b	1.42349063249145	0.023187751763189	Up
Zfp768	1.42297949650311	0.00129008975881319	Up
Zfp532	1.42289859366107	0.0280158922933928	Up
Ccdc85c	1.42139992750193	0.00570013730685909	Up
Plekhg3	1.41644574463672	0.000219073038943902	Up
Arhgap35	1.41569774544606	0.00148139084995298	Up
Akap9	1.41465554116211	0.000244963356467455	Up
Zfp442	1.41456829799141	0.020667073886096	Up
Krt10	1.41370534842853	0.0230336582210103	Up
Ccdc3	1.4134873171302	0.00292018513420045	Up
Mier3	1.41291511358939	0.00610663649010212	Up
Smo	1.41167614718306	0.00213221567302755	Up
Sptlc2	1.41156117597565	0.00172703869634907	Up
Gnb5	1.41113271176513	0.00758034365875482	Up
Carhsp1	1.41071616409843	0.00161046625438615	Up
Uaca	1.41060937990918	0.00198442337827925	Up
Galnt12	1.41023665096605	0.000309049374177455	Up
Slc4a3	1.41006650526892	0.013852009543116	Up
Styx	1.40898507701763	0.0117903193449945	Up
Etfb	1.40463687134695	9.53332878766064e-06	Up
Lrsam1	1.40341834660881	0.0166245305949572	Up
Fhdc1	1.40304289629671	0.00205239803980871	Up
Myo10	1.4013640523414	5.56531582373748e-05	Up
Kif13b	1.3997505942122	0.00112560406936784	Up
Pls3	1.39967873968186	0.00194628176015051	Up
Atp5mpl	1.39860829374231	1.4056051543751e-05	Up
Gclm	1.39781121173364	0.00771418659796275	Up
Gnaq	1.39752173045039	0.00021965366458736	Up
Cttnbp2nl	1.39600881315298	0.000323907597726458	Up
Wwp1	1.39460429302707	1.7910871783768e-05	Up
Rbbp9	1.39323608669639	0.00617677868463385	Up
Mindy1	1.3919013107861	0.00148364141190772	Up
Rhoc	1.39159830365609	0.0163245059924242	Up
Acot7	1.39014900311126	0.00397663447655685	Up
Mrtfb	1.38823156443878	9.72890234989415e-05	Up
Atp5g3	1.3873327344637	0.000237333410006211	Up
Rab6a	1.38579215961666	0.000431866030786134	Up
Marveld2	1.38365588094076	0.000239615468662303	Up
Epn2	1.38279363336241	0.000405142222747531	Up
Niban1	1.38219543023163	0.00125874944399745	Up
Chmp3	1.37931526244308	4.71703396872684e-05	Up
Eln	1.37923705006612	0.00106443676507886	Up
Acadl	1.37720029223757	0.000101970667761148	Up
Plppr2	1.37660281185829	0.0326406608720894	Up
Col1a2	1.37645409918963	0.000504564297332023	Up
Thnsl1	1.37601273778091	0.0192396590746003	Up
Megf8	1.37494228691509	0.00062449174026769	Up
Ndufc1	1.3730859809116	0.000229454299121205	Up
Plac9a	1.37304071215829	0.0142375807083689	Up
Mapre3	1.37269380822683	0.0393696432540198	Up
Jun	1.37159661518981	0.0120473383717499	Up
Klf6	1.37013323484842	0.0084227642402457	Up
Poc1b	1.37007548677364	8.43781833293427e-06	Up
Rnf103	1.36980107845752	0.013107479174413	Up
Coa3	1.36965836311662	0.000226462627265067	Up
Actn4	1.36920284777807	0.0113505198541384	Up
Rnf43	1.36865272812517	0.00153123944624646	Up
Mpi	1.36817144852234	0.00351928866639657	Up
Dynlt1c	1.36703746452883	0.0385096583945676	Up
Bag3	1.3669300245012	0.000259440230995887	Up
Sdhc	1.36667870541396	3.31525199172671e-05	Up
Fkbp5	1.36631278891842	0.00065031565117501	Up
Pttg1ip	1.36611589602137	0.00422827596146192	Up
Ctnna1	1.36563686461449	0.00356665632138424	Up
Cox5a	1.36326167097541	0.00109101172015047	Up
Adcy9	1.36250860033666	0.00694502915208081	Up
Map4k3	1.36177512335932	0.000132227162094644	Up
Akr1e1	1.36113356454978	7.07642246181061e-05	Up
Nipsnap2	1.35951364965824	5.98940962848271e-05	Up
Arhgap12	1.35938952470729	4.34322472367645e-05	Up
Maged1	1.35852886021641	7.52389399214075e-05	Up
Itprid2	1.35789136957081	0.00863378752251851	Up
Fgfr3	1.35753470543077	0.0317948498820603	Up
Qsox1	1.35443915872227	0.00512726034795713	Up
Cnksr3	1.35441969940022	0.00384849738014962	Up
Inppl1	1.3512497224129	0.000435254731890784	Up
Myo18a	1.34996919599134	0.00865774942634192	Up
Ltbp4	1.34993597374876	0.0011129279785933	Up
Rab11fip1	1.34946286019024	0.0356947528716794	Up
Bod1	1.34901024003275	3.68167522454903e-05	Up
Podxl	1.34782469179084	0.0035908019461109	Up
Bcl2l2	1.3449699106034	0.000497138317033479	Up
Fgf11	1.34375258270188	0.00509293387780568	Up
Ndufa12-ps	1.34315574518771	0.0459527924982521	Up
Glul	1.34198158265814	0.00311996443333105	Up
Prkaa1	1.34192779311818	0.00366949940362685	Up
Aldh2	1.34050315374242	0.00122807038719331	Up
Ccdc8	1.34044497237136	0.017480120229826	Up
Itsn1	1.34006862784496	0.000176403477805221	Up
Pdgfra	1.33712092573745	0.0125675453945579	Up
Cbr4	1.33693123574754	0.0120371307377558	Up
Plscr4	1.33638708525422	0.011301284142577	Up
Ston1	1.33569398129622	0.0228801503069182	Up
Mbnl2	1.33549151899934	6.72822559246781e-05	Up
Pmepa1	1.33479587644891	0.000182293518866055	Up
Mxi1	1.3344046900807	0.0299279072798063	Up
Scaper	1.33409925086307	0.00159516764484013	Up
Diaph2	1.33363508908064	0.0017991134978552	Up
Ecm1	1.33306669481756	0.00124828818810561	Up
Nsmf	1.33177354263641	0.000236901121247039	Up
Ppm1l	1.33145940952792	0.0300472428897006	Up
Sbf2	1.33042435051394	0.000230053476541609	Up
Tlr3	1.33026672013018	0.00166425495490545	Up
Syt13	1.33005731998612	0.0066521132668806	Up
Rdh13	1.32966530003557	0.000272208838353307	Up
Uap1	1.3291324829009	9.90760217344955e-06	Up
Papss1	1.32909159079073	0.00903289401591784	Up
Lamc2	1.32865914891167	0.00690166507775148	Up
LOC118567339	1.32742326971565	0.00417454637938252	Up
Ssh3	1.32723894914729	0.00059622175113804	Up
Pak4	1.32722426882218	0.0130269428324942	Up
Hspg2	1.32626976388633	0.00370944734800071	Up
Pkd2	1.32464501886392	0.0127884417937061	Up
Cox6c	1.32416664761231	2.38072454611579e-06	Up
Kit	1.32404656376495	0.00307826752037753	Up
Fktn	1.32321611037927	0.00272733114977901	Up
Trim56	1.3228984415084	0.00496832880077764	Up
Alcam	1.32244020948887	0.000144214582793957	Up
Large1	1.32206781541404	0.00520560609165486	Up
Smim3	1.32186341606969	0.0233862911238013	Up
Prx	1.32166986602159	0.0369851966549035	Up
Brpf3	1.32075125615893	0.00212799293304182	Up
Ggact	1.31989308498986	0.000469782388503503	Up
Degs2	1.31932108994369	0.0330096463923665	Up
Acat1	1.31886151361686	2.83779820988497e-05	Up
Ppic	1.31874500464518	0.0243031283284055	Up
Pgd	1.31824453069182	0.00163418307472291	Up
Col4a2	1.31674417640234	1.87593336199564e-05	Up
Egln3	1.31662750424159	0.0244668550198245	Up
Larp1b	1.31615546786576	0.00109308998152083	Up
Pcyox1	1.31592655683965	0.000383435279998906	Up
Pgm1	1.31571567778747	0.00102638092071549	Up
Dbndd2	1.31165523750357	0.0122453502831176	Up
Dhcr7	1.31160832117157	0.00354164298018908	Up
Hadh	1.31141547326858	0.0352091219631033	Up
Rbfox2	1.31088030687593	0.0234610256170515	Up
Plcb4	1.31012274028865	0.0133113484349498	Up
Tmem181a	1.30997258746022	0.001874545676956	Up
Cox6c2	1.30987746816908	0.0377139011548258	Up
Acadvl	1.30965289926796	2.58530662319913e-05	Up
Cdkl2	1.30951701416113	0.00358909977116223	Up
Cox19	1.30876647487578	0.00156802288741813	Up
Uqcrq	1.30868107673604	0.000285141178857628	Up
Tax1bp3	1.30859801176898	0.0386208722464608	Up
Avil	1.30757907098784	0.041760825194631	Up
Adam15	1.30506034843799	0.000207454031391126	Up
Adck5	1.30393790991301	0.00737128713976154	Up
Ppfibp2	1.30084144219861	0.00103436165531357	Up
Fcsk	1.29955229959499	0.0015910632802734	Up
Oxsm	1.29857344132895	0.00556631262987846	Up
Sh3d19	1.29796654175179	0.0171612288722661	Up
Naprt	1.29777558275474	0.0427904746770227	Up
Nacc2	1.29744844632675	0.000340166598306946	Up
Junos	1.29358622476327	0.0309261848697798	Up
Acacb	1.29144446291379	0.0177207552425112	Up
Rnf32	1.28895581949961	0.0185821368776259	Up
Acad8	1.28884394459575	0.00126198837825745	Up
Ghr	1.28836226178129	0.0153480078881468	Up
Flna	1.28818865284094	0.00673698759835439	Up
Rpgr	1.28720742695634	0.0109403412633745	Up
Pycard	1.28619657619185	1.05816416955342e-05	Up
Cox4i1	1.28555350333716	0.00011646957815157	Up
Fn1	1.28390495612717	0.0392100281596922	Up
Coq5	1.28221873395762	0.00747673106252134	Up
Tmtc3	1.2808349969572	0.040238451926769	Up
Snx16	1.28064762992192	0.0193521127811446	Up
Inafm2	1.28063376399515	0.00140952768490323	Up
Plau	1.28008679312083	0.0012544055654316	Up
Plin4	1.2796567351442	0.0319758215617904	Up
Slmap	1.27920630485786	0.00780063571327164	Up
Atp5k-ps2	1.27840738722923	0.0201185897569629	Up
Fbxo34	1.27831830336664	0.00370300045218336	Up
Golga4	1.27821952189208	0.00171923923429286	Up
Prelp	1.27802410320206	0.0232633272166958	Up
Coro2a	1.27782649456063	0.0153214052246431	Up
Ctif	1.27765073743811	0.0330126574304642	Up
Gab1	1.27611094278537	0.0091548255312374	Up
Itga1	1.27604129295254	0.0323569320743583	Up
Plekhb2	1.27598974723882	0.0158194672250466	Up
Bcam	1.27468107580986	0.028412298805026	Up
Myh10	1.27321411746012	0.00198296358280412	Up
Hcfc1r1	1.27235779239581	0.000487261103198071	Up
Shtn1	1.27165452266588	0.000102613386037221	Up
Tbx2	1.27113963430884	0.00329698095887873	Up
Lrp5	1.27113383139719	0.0136111855881955	Up
Clec3b	1.27056458235749	0.0248814922345949	Up
Ap1s1	1.27008496843369	0.000280337937376888	Up
Tspan7	1.26803745359364	0.000104754906263396	Up
Septin8	1.26658890663716	1.33289926252043e-05	Up
Atp5md	1.2664967107596	0.000996812071021342	Up
Tshz1	1.26534187520326	2.02253911456265e-06	Up
Alpk1	1.26302320533576	0.00179186823737773	Up
Trabd2b	1.26190549739603	0.0233679510074954	Up
Amigo1	1.25693661208204	0.0230391814996569	Up
Pef1	1.2563044699778	0.001621750160545	Up
Adgra2	1.2561969347309	0.00954481008540707	Up
Fbxo25	1.2553294388568	0.0241006446149736	Up
Marveld1	1.25422389659416	0.00622626022478379	Up
Arhgap42	1.25404488261811	0.0114868322742081	Up
Ccdc186	1.25365846040989	0.000581300086054389	Up
Tmem238	1.25276014331822	0.0481135500778438	Up
Ldlr	1.25147070950591	0.00515995306364151	Up
A4galt	1.2513249750134	0.00513669593416109	Up
Agpat5	1.25127317159575	0.00591595468005942	Up
Wdsub1	1.25012036315153	0.00437637850997671	Up
Ecm2	1.24999748908823	0.0314820400240578	Up
[truncated: 2,302 more rows]

## Sheet: Table S1-heart
geneID	log2(fold change)	p-value	Regulation
TrnS1	3.22003290396701	0.00132127517225904	Up
Hbq1b	4.59234584826475	3.56667244920728e-07	Up
Tspo2	3.6612369347757	8.19266697358601e-11	Up
Gypa	3.51947406769335	1.36693825550282e-06	Up
Ahsp	3.36708817212563	5.00322101313535e-10	Up
Slc4a1	3.02499572554887	8.18240790834563e-05	Up
Apol11b	2.97408419687056	5.39675830472784e-05	Up
Kel	2.78911343399866	0.000337166279984098	Up
Epb42	2.75282719872554	4.08408408082975e-09	Up
Trim10	2.74265741557065	0.000415625880973934	Up
Mir499	2.69948795183112	0.00497260464810106	Up
Tent5c	2.66912679912794	2.41376291115552e-07	Up
Ctse	2.66088156704636	3.74592601195787e-07	Up
Hbb-bt	2.62132061536458	1.6756704332941e-05	Up
E2f2	2.46744000448719	2.868954029489e-16	Up
Alas2	2.44121156864138	3.20252822005813e-05	Up
Hba-a1	2.40835699383297	1.47419363386442e-07	Up
Pimreg	2.37139090775439	0.000426267315909341	Up
Slc38a5	2.34937961299393	0.000821286890639038	Up
Snca	2.32612649518299	0.000481095908355113	Up
Car2	2.29446265500181	2.61698289460104e-07	Up
Lockd	2.24944358215173	0.0083686038525044	Up
Bpgm	2.22313231878232	1.63987633672992e-08	Up
Specc1	2.19750081658359	7.90418596067175e-22	Up
Cyp4b1-ps2	2.17484921262474	0.0138873663529703	Up
Il4i1	2.11445960766395	0.0354077790830059	Up
Cd24a	2.05266423855881	1.61415517376518e-06	Up
Ube2c	2.02436883198064	2.14712685890397e-09	Up
Tspan33	2.00463687985923	2.34162553995133e-07	Up
Diaph3	1.96670614865521	0.00119994900840407	Up
Nusap1	1.91175924230117	1.45938083111307e-07	Up
Gapdh-ps16	1.87982727214186	1.63558219881032e-06	Up
Slc25a37	1.85884659225723	4.87561185699407e-21	Up
Isg20	1.81802065720771	7.99830760715184e-05	Up
Hbb-bs	1.77880713951127	0.00538611011223378	Up
LOC118567621	1.75812506889713	0.0107860662036561	Up
Rgs11	1.72665579576903	0.0116966747971916	Up
Mkrn1	1.69502521209112	7.24774648544036e-07	Up
Ube2l6	1.69396091551268	0.00228805613440177	Up
Hba-a2	1.66401482036275	0.0108015420818517	Up
Ckap2	1.58081175979869	0.019208785481545	Up
Pbk	1.55643838458939	0.0190437601450846	Up
Uckl1os	1.53264852995977	0.0253193007622965	Up
Snord82	1.52559396806551	0.0202389202816133	Up
AI662270	1.51880559237234	3.40046384555188e-07	Up
Foxm1	1.51689238328997	5.8408536317087e-05	Up
Zbtb16	1.51265820567001	0.00161624821042696	Up
Ube2o	1.49415979407024	2.54511159734187e-18	Up
Esco2	1.48514821900124	0.0435604704682789	Up
Tpx2	1.46862952596271	0.00245820574577448	Up
Mns1	1.42395054272027	0.027360857425042	Up
Nrp	1.3565263018791	0.00727944088518899	Up
Kif18b	1.34016023405865	0.0163208858698513	Up
Epb41	1.32469481151618	1.54421285708996e-20	Up
LOC118567748	1.29215686995987	0.0454329279005684	Up
Pabpc1	1.28932925092566	4.85139955676525e-14	Up
Arhgef39	1.23123829853883	0.0112282105219264	Up
Gda	1.22753291103532	3.18340661764687e-15	Up
Cdc25b	1.21766556556218	3.03654412695422e-09	Up
Mir6236	1.14939394487493	0.0114412625794243	Up
Cd109	1.14762468346169	0.00347698039217734	Up
LOC118568041	1.1400233296737	8.2744519210817e-06	Up
Rec114	1.12281314301233	0.0145291258162638	Up
Cdk1	1.10995646783146	0.00691844931903315	Up
LOC118568122	1.10953553181425	0.0471510522930871	Up
Mpp1	1.1004567696262	2.02284158981265e-07	Up
Snord49a	1.09671791616572	0.00777548225783862	Up
Gpx1	1.09240107608152	1.29349160907327e-11	Up
LOC118568370	1.09172855411339	0.00923404498824077	Up
Bnip3l	1.08913128580946	8.62074721368108e-11	Up
Fech	1.0804542429955	5.62945520188223e-16	Up
Anln	1.07686500032516	0.0194434874462783	Up
Slc7a5	1.07284061583163	7.72088163127511e-05	Up
Ccnb2	1.06519541552324	0.0179451363713943	Up
Chkb	1.06006296471047	0.0495709183488824	Up
Mfap4	1.04743700118584	2.06068506393155e-13	Up
LOC118567513	1.04341547336246	0.0218095974254727	Up
Ncaph	1.03692289918626	0.0302672718539204	Up
Trim59	1.02191191438954	0.0351136766915112	Up
D7Ertd443e	1.02152285888914	0.0275490927689764	Up
Fam117a	1.01736477141324	2.87830476385649e-06	Up
Sfrp2	1.00771348052954	0.000191595091880302	Up
Traf3ip3	-1.01149	0.035019301837206	Down
Alox15	-1.01769	0.0321304621503629	Down
Gprin3	-1.01916	0.0275788691513648	Down
Acp5	-1.05149	0.0138744422815737	Down
Acaca	-1.05998	0.036600952575475	Down
Pnpla3	-1.07734	0.00302184280203979	Down
Rn7s1	-1.08466	0.00768540931374984	Down
Gpd1	-1.10468	0.0373152486337475	Down
Thrsp	-1.10692	0.0277678920330863	Down
Itpkc	-1.12035	0.0372483850272216	Down
Olfr1396	-1.12674	0.00775553992818918	Down
Tmprss13	-1.12842	0.0274119780222614	Down
Gzmb	-1.13028	0.0106721805072718	Down
Cxcl13	-1.15664	0.022658967297529	Down
Lrrc69	-1.16483	0.02270331793513	Down
Rab3c	-1.18954	0.0488277056755834	Down
Lyz1	-1.19025	0.025273166727542	Down
Kcnc4	-1.19399	0.0406030525444458	Down
LOC68395	-1.23811	0.0032087891664989	Down
Adig	-1.28489	0.0179336331167624	Down
Syne4	-1.306	0.0319055606327712	Down
Car5b	-1.33976	0.00199481717234713	Down
Nr4a1	-1.3438	0.00136099875836109	Down
Abhd15	-1.35578	0.0123216848855054	Down
Arxes2	-1.39484	0.0270017431774953	Down
Scd1	-1.41464	0.0118439243903187	Down
Apol6	-1.43919	0.000836869630093725	Down
Clstn3	-1.47188	0.000465962133864869	Down
Tes3-ps	-1.47874	0.02941246127594	Down
Cyp2e1	-1.48187	0.0458326144280538	Down
Angptl8	-1.49809	0.0361496480605653	Down
Plac8	-1.52302	0.00148410979720364	Down
Apoc1	-1.5865	0.00864581030738079	Down
Tenm4	-1.60219	0.00375121331070649	Down
Zcchc18	-1.73692	0.0235381806133347	Down
Fos	-1.79349	0.00588395932581389	Down
Slfn4	-1.81765	0.0478934623963404	Down
Fasn	-1.83689	0.00183869000513345	Down
LOC118568652	-1.85909	0.0264356626253665	Down
Cdo1	-1.98229	0.0016636849633968	Down
Lgals12	-2.02163	0.0133232940702822	Down
Bmp10	-2.04459	0.0282084371163139	Down
H2-Q10	-2.17297	0.00284981087204424	Down
Cidec	-2.24249	2.86379735071388e-08	Down
Slc7a10	-2.28188	0.00542347889340552	Down
Adipoq	-2.3095	0.000893091839601896	Down
Car3	-2.43541	0.00133726024239274	Down
Plin1	-2.63086	0.000897564932237421	Down
Jchain	-2.7451	0.00707882381335034	Down
Hp	-2.86886	0.000115725272068687	Down
Adrb3	-2.91741	0.00286638946044938	Down
Retn	-2.96458	0.0008488983180245	Down
Pck1	-2.9796	1.80673895191154e-05	Down
Cfd	-3.01464	0.000107902553291882	Down
Tmem45b	-3.49401	0.00138579258571564	Down
Ucp1	-4.30805	1.20373932444854e-05	Down

## Sheet: Table S1-intestine
geneID	log2(fold change)	p-value	Regulation
Tff2	5.44521850322131	0.000325602600296444	Up
Gsdma2	5.26191544212025	2.49877821637365e-08	Up
Mucl3	5.15183551463312	1.92676053348552e-09	Up
Fendrr	5.14329157184903	2.33978191808537e-10	Up
Meg3	5.03419822333385	1.29662440882802e-09	Up
Il17re	4.90138890582652	1.39132087585825e-08	Up
Chia1	4.76147258221179	1.40482300444671e-08	Up
Ctse	4.74639132906491	3.69158344142904e-08	Up
Carmn	4.62290365010575	1.85720751914097e-07	Up
Smim38	4.57730951475811	6.16787702390172e-08	Up
S100g	4.5549845753302	0.00451079992369014	Up
Muc6	4.49054215622211	1.22632661019269e-08	Up
Gkn2	4.45196979449991	2.36030833928072e-08	Up
Hamp2	4.44820906943198	1.69868882076106e-06	Up
Slc16a7	4.36425458568601	7.67597274030873e-09	Up
Ttr	4.35985045998297	3.10349373367436e-06	Up
Eln	4.28688754292348	1.13811427858165e-07	Up
Sult6b2	4.21416046441069	0.000849825100094831	Up
Nrbp2	4.20698792660357	6.61290931173324e-06	Up
Psca	4.11852951046681	1.26744252814672e-07	Up
Dixdc1	4.07478382761237	0.00033119795570953	Up
Sst	4.0411046579156	1.32971612826952e-07	Up
LOC118568353	3.99652559232648	1.52652753994945e-05	Up
Rcan2	3.9345414589915	0.000202350403444248	Up
Lrrc7	3.8889875637213	5.24990171125406e-05	Up
Tnni3	3.87657385858373	0.000110436383360323	Up
Clps	3.80230087825849	2.97817563562648e-07	Up
Sirt4	3.7873048779856	3.23117092836815e-07	Up
Ano1	3.73903153817605	0.000209550967532488	Up
Cela1	3.73649708207564	5.52205309792001e-05	Up
Baiap2	3.72209554639994	4.63076350517621e-07	Up
Cbs	3.67617939605542	0.00122654240707747	Up
Mecom	3.6599860583062	5.57238804946216e-07	Up
Ghrl	3.6231997379029	3.72516612739328e-06	Up
Rnase1	3.60834871388559	0.000406433270117165	Up
Pdx1	3.56935562260993	0.0114108562219694	Up
Tmem171	3.52677358097629	3.41547829689155e-05	Up
Prpf40b	3.51759856243702	0.000301671549814468	Up
Adgrl1	3.50431096289392	2.58444424976559e-06	Up
Peg3	3.48806211212525	1.42625111593965e-05	Up
Igf1r	3.46386982089636	2.20617256342111e-05	Up
Abi3bp	3.46228100654778	0.000140147572815038	Up
Zfp692	3.44461504044536	8.64887751442488e-05	Up
Ints6l	3.40546061165243	5.96862944199278e-05	Up
Snhg11	3.3986774580439	0.000673821107426136	Up
Itga5	3.39721900642304	1.01863033910435e-05	Up
Gkn1	3.3729025809671	1.07200014674773e-05	Up
Uggt2	3.36555969476593	0.00432032307881352	Up
Gpc6	3.36273016359451	0.000713096857471213	Up
Ptprs	3.34740754162646	6.89404534297006e-06	Up
Nav3	3.30663036363389	0.000260483973278789	Up
Pdia2	3.30444329005908	1.04063506199978e-05	Up
Pdgfb	3.27775526231883	0.000349041223520701	Up
Gabbr1	3.26152833020733	0.000393226648377897	Up
Bckdhb	3.24481191068488	0.000283957829951761	Up
Plagl1	3.21624116111805	0.00061525951842113	Up
Myh11	3.21082301505146	3.68124363003678e-07	Up
Efna5	3.19951683593343	0.00014639275778911	Up
Clic6	3.19910131858778	4.59905499503045e-05	Up
Ttc28	3.19674534095902	0.000180634156979014	Up
Slc2a4	3.19652402004992	0.000195671458312797	Up
Armh4	3.19226130609892	0.000240526543240892	Up
Epn3	3.1881579490062	7.20732241022743e-05	Up
Furin	3.18672549846508	3.59454414707564e-05	Up
Firre	3.17166224507667	0.00172776348830914	Up
BC023105	3.15358484168422	2.26380623338783e-06	Up
Lhx5	3.14616008340536	0.000145639836032869	Up
Muc1	3.13634838589076	0.000118396235520883	Up
Dcbld2	3.1336968995932	0.000217209994247234	Up
Col27a1	3.12479392175296	8.43383821263165e-05	Up
Sgce	3.1241381542697	0.00106431684995084	Up
Pnck	3.11202794913799	0.00211831579578958	Up
Pdlim4	3.10125537881441	0.00183634509348551	Up
Hoxb3	3.1012255058397	0.00833567295730778	Up
Ptk7	3.09826278127094	0.00435584811368243	Up
Arhgef25	3.09379894391442	1.75235277009414e-05	Up
Myom1	3.08720009508505	6.40250956392417e-05	Up
Fgfr1	3.07565890899205	0.000100846364951179	Up
Plod2	3.06986884197218	0.00303507674525612	Up
Foxq1	3.06851836285262	7.14662567678136e-06	Up
Loxl1	3.06835421703898	0.0014899880316416	Up
Prss8	3.04668888469284	0.000284172504337999	Up
Runx1t1	3.04628506231037	7.1554346200502e-05	Up
Glt8d1	3.04494773481356	0.00355943261770318	Up
Dtx3	3.04432900828456	0.000308308362076318	Up
Pacsin3	3.02891281541369	0.00439418329286043	Up
Fkbp10	3.02101358162551	0.000182235627520706	Up
Ltbp3	3.01175026157778	0.00321875827924262	Up
Kcnma1	3.00729286805793	9.30016246468466e-05	Up
Sema3c	3.00594911691607	0.00388257890727981	Up
Meis1	3.00412297875884	0.000119667138888038	Up
Nlgn2	3.00034120999852	0.000149039028843601	Up
Fam214a	2.99837906549674	0.000160224937195355	Up
Kcnq1ot1	2.99566685675628	0.000120516811949588	Up
Zdhhc1	2.99270912497476	0.000665174321005411	Up
Art3	2.99224548903854	0.00466774113132972	Up
Nipal2	2.99119183191833	0.00121615382059802	Up
Rcn3	2.98560403906944	0.000140385800285215	Up
Zdhhc8	2.96148773596515	0.000601731993658173	Up
Speg	2.95456228767458	1.37832737266458e-05	Up
Zbtb16	2.95236249093863	7.05896336703752e-05	Up
LOC118567821	2.9451291292454	0.000703996065258801	Up
Kcnk3	2.93781038948787	1.72839040014446e-05	Up
Sorbs3	2.93099043124634	4.73182258529173e-05	Up
Fes	2.92407735033569	3.43943141288264e-05	Up
Dnm3	2.92058275932292	0.00113109971423322	Up
Fam193b	2.9170415438518	5.08617554831625e-05	Up
Nupr1	2.91319067085254	9.99577331700153e-06	Up
Egfros	2.90896129041293	0.0230694905032012	Up
Lpl	2.90691605514101	1.36478660133302e-08	Up
Chrm3	2.9023909309428	0.000806064696005017	Up
Sfxn3	2.89940903428647	1.07753516882192e-07	Up
Ppp1r9a	2.88775088757272	0.00143362047013205	Up
Prkab2	2.87915926343796	9.50923461650387e-05	Up
Sema3f	2.87548583428885	0.00765590138977487	Up
Actn1	2.87532828503234	5.81798861028342e-06	Up
Dbn1	2.86806961890367	0.000233454615212866	Up
Celsr2	2.86664336855204	0.00585477280234602	Up
Tmem181b-ps	2.83641557506605	0.008420726334848	Up
Adamts10	2.83439866568177	0.00224265618217312	Up
Col16a1	2.82378189068273	0.00104970222297051	Up
A4galt	2.81199585678543	0.004142401466717	Up
Slc39a10	2.80382614310124	0.000324572634094237	Up
Col7a1	2.80331239430246	0.0055622334228917	Up
Tesc	2.80256357224328	0.00156841781492839	Up
Gpc3	2.8017262545296	0.0214366956375942	Up
Kctd15	2.79914822663775	0.00167772645993084	Up
Evc	2.79553491460461	0.00252254461218984	Up
Atp2b4	2.79251739453478	0.00131531244773382	Up
Smarcd3	2.78968056608257	0.00328060766182407	Up
Grem2	2.78844682518532	0.00359665386322881	Up
Gas6	2.78473289262121	0.000630624158581003	Up
Krt10	2.78259285074133	0.00587536321699238	Up
Thbs2	2.77841361979743	0.00568651989314678	Up
Rarg	2.77607189649559	0.00106895682332091	Up
Rusc2	2.77035747047245	0.0114141211861142	Up
Echdc2	2.7650663933666	0.000630068348823142	Up
Mal	2.7631165697042	0.00195908542106587	Up
Tinagl1	2.76057023365833	0.000257480757165731	Up
Ank1	2.75893620756679	0.00111068569287183	Up
LOC118568777	2.7448560326379	0.000209883036422106	Up
Gas1	2.73728475050628	0.000762101013014171	Up
Ago4	2.73719949912683	0.00807782149761339	Up
Cd9	2.72997224129117	0.000131251079134636	Up
Hspg2	2.72909960590753	0.000429205000802437	Up
Tcra	2.72677339546634	0.0020855596328759	Up
Zfp821	2.72519743652617	0.00309651270696586	Up
Shank3	2.71619694140575	0.00458475421219811	Up
Slc4a2	2.69589963618202	0.00014355912872832	Up
Prdm16	2.68456724747126	6.38710749133886e-05	Up
Cntln	2.66529523559938	0.00891486888041808	Up
Rspo3	2.66520628230972	0.00182692669958239	Up
Oas2	2.65573448936867	0.000422153141310301	Up
Mfsd12	2.65493941503282	0.0238247507414777	Up
Map1a	2.65336398797423	0.000217222319973431	Up
Hba-a2	2.65267580866313	2.06546848533657e-05	Up
Prickle1	2.65124255198373	0.0182560825224762	Up
Shank1	2.64139791260778	0.00196521793701054	Up
LOC118567330	2.63812878144975	0.00313335562273767	Up
Lamb2	2.63354701544562	0.00110491591610044	Up
Mill2	2.62609054241828	0.00122471795450005	Up
Igsf9b	2.62122352331413	0.012879816927059	Up
Tafa5	2.61781031741567	0.00505902491174193	Up
Pbxip1	2.61619626189015	9.91975254077793e-05	Up
Afap1	2.6073869044023	0.000109010569446396	Up
Als2cl	2.60436417968032	0.003068460360548	Up
Qtrt1	2.59167086846399	0.00318386947810797	Up
LOC118567348	2.5886958197982	0.00360375100683927	Up
Apba2	2.58832679174556	0.00768715079402773	Up
Rpsa-ps9	2.58788402040306	0.00115964804393366	Up
Trim17	2.58616170888269	0.00894469052524733	Up
Enho	2.58062889910462	0.00637055364455933	Up
Enpp2	2.57921863734101	0.00849994819561796	Up
Syngap1	2.57819976013947	0.0010493255611737	Up
Gap43	2.57347463552391	0.00155873598013205	Up
Rhbdf1	2.57138258345061	0.00564536160787315	Up
Hmcn2	2.56190184050828	0.00161867591509786	Up
Mgp	2.55932415304547	0.00138534014593707	Up
Pde4a	2.55909553936747	0.00402918553217271	Up
Col23a1	2.55648617378234	0.00496602480283653	Up
Vps13c	2.55389443416921	0.00142754845836367	Up
LOC118568370	2.55342182865903	0.00197271527809852	Up
Il11ra1	2.5474631852103	0.000498023965211426	Up
Sntg2	2.54573567344595	0.00170519163517501	Up
Scn7a	2.53785975717214	0.0046535345797069	Up
Gga2	2.52859854999832	0.000434492183404922	Up
Adam33	2.52619110144529	0.000337712479929356	Up
Ank3	2.5221150709981	1.59644239931974e-06	Up
Mn1	2.52165858224496	0.000999949319205954	Up
Polr1a	2.51226552646323	0.00522839256528328	Up
Hoxa5	2.5085940195173	0.0034463736420932	Up
Eno3	2.50412273850538	0.000978720111290319	Up
Mfap4	2.4999757480327	0.000652741780417865	Up
Bag2	2.4981605674213	0.00272282289625366	Up
Dipk2b	2.49793337223797	0.0113157149910765	Up
LOC118567533	2.49318944167178	0.00414057985175857	Up
Klhdc8b	2.48638862314308	0.0053075060815682	Up
Vcan	2.48206165041596	0.0330480226997135	Up
Neat1	2.48063961353503	0.000393613195389343	Up
Elapor1	2.47533015665871	0.000458050388579052	Up
Ccdc88a	2.47445729889309	0.00162452274679931	Up
P3h3	2.4701136847559	0.00872029829852537	Up
Syt11	2.46859314186402	0.00269813535281513	Up
Ern2	2.46856539665898	0.0191766775382571	Up
St3gal3	2.46740379552893	0.00147641049787398	Up
Cacna2d1	2.46458623855685	0.00719798699039924	Up
Tubb4a	2.4591150062101	0.0112838657186815	Up
Aspn	2.45841775280009	0.00292825039556676	Up
Guf1	2.45837122323021	0.000373394803181189	Up
Cngb1	2.45739782641908	0.0422024755440825	Up
Rapgef4	2.45723176746078	0.000690173950171291	Up
Adamts7	2.45651436944938	0.00208072722675402	Up
Col5a2	2.45544629613622	0.00103942903152899	Up
Cadm1	2.45344527751935	0.0272495017671553	Up
Uchl1	2.45233680332942	0.0350323751205552	Up
Fxyd1	2.44783551031828	0.00066600354619169	Up
Adcy7	2.44697740339013	0.00306626271174904	Up
Zfp641	2.44391984313719	0.00377968432324577	Up
LOC118568618	2.44106852407859	0.00281103607674902	Up
Frmd4a	2.44103514341624	0.00504675961822029	Up
Igfbp5	2.42816782442272	0.00415009987311297	Up
Dock6	2.42791963293936	0.000729092122515655	Up
Gpt2	2.42669847457205	0.00358762788243523	Up
Tspan9	2.4202899666077	0.00650985440488442	Up
Dnal1	2.41431420776736	0.00700562918471445	Up
Timp3	2.41276392084866	0.000320504555201518	Up
Slc44a2	2.41263539753608	0.00226136470734138	Up
Apba1	2.41104406131562	0.00580433894706786	Up
Slc7a5	2.41037082133972	0.00297520029193011	Up
LOC115487155	2.40543956854541	0.00120999980310224	Up
Serpinh1	2.4003078367951	0.000331766370040146	Up
Mxra8	2.39854667755369	0.000553427196459865	Up
Bace2	2.39834799855386	0.00826981903248929	Up
Pex5l	2.39535586096324	0.0128696424933426	Up
Col1a1	2.39447127152629	0.00251892383839583	Up
Zfp503	2.38955089959234	0.00393095295510991	Up
Chga	2.38520481648701	0.000701092707351306	Up
Ckap4	2.38177227749398	0.00104781351462789	Up
Plp1	2.37991330563051	0.00024577463450462	Up
Ctsw	2.37843273727725	0.00815962245775034	Up
Nav1	2.3722218306672	0.000626569788250685	Up
Gprasp1	2.3713024683782	0.00116505322337543	Up
Tmtc1	2.3698021956636	0.043924992492872	Up
Cd46	2.36876306868245	0.00523973877298899	Up
Kcnh2	2.36355084046456	0.018470045756569	Up
Col1a2	2.36248113669637	0.00240801342713058	Up
Ctxn1	2.36212170170206	0.00335428190030278	Up
Acadsb	2.36169483908638	0.00236502237804719	Up
Scnn1a	2.36166298711675	0.0170522518959772	Up
Spaca6	2.36072725703988	0.00333149237001794	Up
Sparc	2.35891805456444	0.000436656505724105	Up
Tbxas1	2.35876516894978	0.00215890179504425	Up
LOC118568386	2.35397868863775	0.00823385690869	Up
Shisal1	2.35084997139123	0.00674378569549202	Up
Gramd1a	2.35075665575183	0.00213164989982029	Up
Dgke	2.34882123311867	0.00551149104283433	Up
Sfi1	2.34696238040408	0.00056809320194387	Up
Prnp	2.33595309385458	0.00403568461343034	Up
Ppic	2.33282323776768	0.00718102991433392	Up
Dtwd1	2.33039855277644	0.0218157418683383	Up
Hmgn3	2.32946103765447	0.000896615925541337	Up
Hba-a1	2.32754180276319	0.000606104526600787	Up
Slc1a5	2.32670078264566	0.000883481707443871	Up
Smtn	2.32660345794328	0.000260721234195117	Up
Esam	2.32521164297037	0.015955814550917	Up
Nhsl2	2.32302009902877	0.000264493148872909	Up
Tspyl2	2.32198388291687	0.00611715931957991	Up
Slco3a1	2.31763660857505	0.00119972165511784	Up
Cdc42ep1	2.31724323881307	0.00463775133647324	Up
Enpp4	2.31703200017067	0.0055722296482757	Up
Atp1a2	2.31678188643462	0.00178633039553272	Up
Phlda3	2.31343031569301	0.00290749284377577	Up
Zscan26	2.30992792751859	0.00236247639783889	Up
Hdac6	2.30959243225969	0.0481049472265508	Up
Pkd1	2.30734675578175	0.00542223605003221	Up
Hsp25-ps1	2.30676441247639	0.00248483753987641	Up
LOC118567716	2.30631576398946	4.64812866734601e-05	Up
Islr	2.30560180882638	0.0219888276901754	Up
Slc27a1	2.30410105586175	0.0118172242327667	Up
Cplx2	2.30180528086536	0.00400094475260931	Up
Cenpt	2.29673437963783	0.0136405771398439	Up
Atg16l2	2.29666857721103	0.0050280264991717	Up
Stum	2.29495381828845	0.00306907013777647	Up
Tns1	2.28636764102486	0.000466009737975302	Up
Cuedc1	2.28313815594591	0.00433192495994951	Up
Hspb8	2.28141871528295	0.00077379514524463	Up
Hmgcs2	2.2814164472804	0.00894098895725827	Up
Tmem38a	2.28116649742033	0.011891688833786	Up
Sfrp1	2.27902222321323	0.000836826930851818	Up
Slc39a13	2.26983732948783	0.0244772449412092	Up
Cc2d2a	2.26883502873395	0.0069119599387903	Up
Enpp5	2.26415949522378	0.00348139588826282	Up
Ifi205	2.26296426930639	0.0326878359410027	Up
Tpcn2	2.2614397223219	0.0179360145752676	Up
Fgfr2	2.25790003032097	0.00408469060935025	Up
Mgll	2.25745150124861	0.00051510949077593	Up
Pxylp1	2.25701344867253	0.0249987343441845	Up
Fam124a	2.25584492331838	0.00394340679696272	Up
Ank2	2.25334799920895	0.000869772794937622	Up
Pirt	2.25272118484147	0.00323708327563791	Up
Wfdc1	2.25151927846479	0.0140110088181339	Up
Rgma	2.2488678423609	0.0012518905775851	Up
LOC118568566	2.24743888785743	0.00715457525380363	Up
Bmp4	2.24661746458064	0.00531075551402449	Up
Fdxr	2.24643708761927	0.00304803682077381	Up
Thada	2.24532675006036	0.00420506706232978	Up
Crtap	2.24466401128752	0.0255444355351832	Up
Telo2	2.24274149466858	0.0167185563311577	Up
Actg2	2.24055868374661	0.000129518254746064	Up
Cyp1a1	2.23916127050735	0.00982855155672294	Up
Arhgef17	2.23510942224982	0.0192774182294206	Up
Tmem150a	2.23391979710018	0.0309381997229958	Up
Snhg20	2.22991995403906	0.0036468940222974	Up
Cd83	2.22888467137085	0.0120323552508488	Up
Acsbg1	2.22129443002051	0.0425184477511721	Up
Miip	2.2181030214614	0.00674119133405175	Up
Sntb1	2.21437993765989	0.00244420145124495	Up
Col5a3	2.21310910127978	0.0103047630854307	Up
Nutf2-ps1	2.21299804767892	0.020106122442401	Up
Nfatc4	2.21207572498205	0.0117108891859603	Up
Rora	2.20987490650361	0.00045551592343674	Up
Eml5	2.20749763719362	0.00177568381073308	Up
Slc50a1	2.20623437585605	0.00205528876659013	Up
Pdlim7	2.20473510583292	0.000142489806049508	Up
Atp11a	2.20221824850576	0.00358435420133715	Up
Ghr	2.19604508137932	0.00151458093075976	Up
Zfp729a	2.19370703447256	0.0102702899149908	Up
Tnfsf12	2.19344628450551	0.00238106017722673	Up
Plcb4	2.19204736427352	0.0251600461363559	Up
Pbx3	2.19182557446151	0.00457935622184702	Up
Polr1b	2.19001314575858	0.00333757436975446	Up
Slc9a1	2.18939380672696	0.0051259677980922	Up
Slc40a1	2.18877542139329	0.0150164528647318	Up
LOC118568658	2.18536273765268	0.0137158422723193	Up
Ccdc3	2.18357199636867	0.00183595552670495	Up
Trp53bp1	2.1809941493136	0.0106527126849322	Up
Car2	2.17980156284422	0.00112035580218212	Up
Sema4c	2.17885933369724	0.0205478377813851	Up
Marveld1	2.17861145708772	0.000956081719241197	Up
Akap8l	2.17854623574321	0.00925993456970132	Up
Bmp1	2.17815356183648	0.0111572094963895	Up
Cdon	2.17611678205016	0.0054114760110636	Up
Lman2l	2.17196263849443	0.00255347172705407	Up
Sgcb	2.17193038688697	0.0466546416052955	Up
Man2c1	2.16849330074282	0.00898813910352371	Up
Celf4	2.16847210911211	0.00486397869680114	Up
Rpl36-ps2	2.16585352823563	0.000111164345661126	Up
Ldlrad3	2.16315767094948	0.0388096534827176	Up
Cyp2s1	2.16298705511899	0.00156780847780411	Up
Fam217b	2.16293227544196	0.0379723605776613	Up
Rasgrp2	2.15833967251035	0.00309185129420222	Up
Ldhb	2.15777010038376	0.00798379996481656	Up
Atrn	2.1571385219778	0.00251974989904788	Up
Sox5	2.15344838632216	0.0118760898248645	Up
Vegfb	2.1524765328894	0.00247658778276197	Up
Eml2	2.14703258258249	0.000507762669259895	Up
Tshz2	2.14703255140853	0.00294444834692668	Up
Ddah2	2.14666097555199	0.00121451209403481	Up
Fmnl2	2.14561469415862	0.0206136223560739	Up
Zfp715	2.14396121360943	0.039036203427654	Up
Fabp5	2.14144156319497	0.00573346753205054	Up
Fads3	2.14129677501054	0.0178232463001336	Up
Cx3cr1	2.14022024331598	0.00897059965994265	Up
Adam15	2.1344612510284	0.00152678087579876	Up
Actr5	2.13270874206502	0.0133725051955273	Up
Ggta1	2.1315496959358	0.00985695360206168	Up
Adcy5	2.12967368493541	0.0244968151323727	Up
Maged2	2.12891264661942	0.027754488572529	Up
Cnn1	2.12526535185808	0.000246596741132291	Up
Dph2	2.1232278599612	0.0260174912014349	Up
Hoxb2	2.12255419020317	0.0130565186145284	Up
Tgfbr3	2.12245622760467	0.00710655994543252	Up
Copz2	2.12051825107654	0.00277487720253503	Up
Emp2	2.11939295992018	0.000139089563287533	Up
Alcam	2.11708034879772	0.0192212419269582	Up
Tia1	2.11365781983586	0.00936751800051731	Up
Fbln2	2.10941307834775	0.0416573354384622	Up
Ccnl2	2.10822631101471	0.00149407121299989	Up
Ak1	2.10462201462346	0.00544422542802215	Up
Uvssa	2.10229633104891	0.0319596130879576	Up
Atp6v0c-ps2	2.10200953915199	0.00170541623965817	Up
Tcaf1	2.10073618389302	0.0175119525990361	Up
Ptn	2.09980811593942	0.00493795429635008	Up
Acta2	2.09885761479902	0.000683814873068479	Up
Bnc2	2.09768122131781	0.0375661690028375	Up
Scmh1	2.09625067635486	0.000726305265708979	Up
Rpl30-ps3	2.09577463737077	0.0184495888869053	Up
Myo19	2.09347656149201	0.0431449914228057	Up
LOC118567607	2.09149902664157	0.00949546094405845	Up
Far1	2.09087090751216	0.00348805520344357	Up
Bcat2	2.09051297202344	0.00344915892849411	Up
Zbtb20	2.08888434868835	0.000133335383954694	Up
LOC118567347	2.08838300188142	0.0339029433432981	Up
Tspan18	2.08592529927029	0.0243859513976453	Up
Tcirg1	2.08476051510944	0.00367712557313782	Up
Sec61a2	2.08474811767572	0.00913279677068953	Up
Meis2	2.08263694728836	4.06998300420659e-05	Up
Zfhx3	2.08106525211593	0.00195327307122798	Up
Rab34	2.07769497968793	0.0165664551557535	Up
Pcdh9	2.0751126482157	0.00353844078039453	Up
Fzd2	2.07416657051398	0.045686824665416	Up
Slc29a1	2.07411934529068	0.00790695160594608	Up
Stimate	2.07344123711499	0.0052807452997935	Up
Atp13a2	2.07144001020461	0.0126036902445788	Up
Rab7b	2.06817386887803	0.00421216961033336	Up
Pycr1	2.06399953225183	0.00535603833695551	Up
Arv1	2.06355629362894	0.0206205773587026	Up
Fnip2	2.05138788052964	0.00367902833344811	Up
Mycbp2	2.05077571850513	0.000374645390516388	Up
Mapk8ip3	2.05074072522067	0.0265150315517948	Up
Hoxb5	2.0418168069722	0.0096757064662842	Up
Zfp280c	2.04169220324454	0.0316550534830258	Up
Maged1	2.04022958903004	0.00329787274497605	Up
Phldb2	2.04000504121061	0.0128125686083922	Up
Pam	2.03539291264704	0.00318558989075968	Up
Notch2	2.03396195563796	0.0297432484638376	Up
Emp3	2.02916160376927	0.00968588295399059	Up
Zbtb1	2.02819119695862	0.00974903465038099	Up
Kank1	2.02616376902293	0.0183685684746004	Up
Tenm3	2.02614582566498	0.034055468770437	Up
Egfl7	2.02587202254375	0.0103105836572172	Up
Snupn	2.02280658049956	0.0108001286833524	Up
Dkk3	2.02100663278965	0.0135064848519253	Up
Fam43a	2.0202879210369	0.0108062875754284	Up
Arap3	2.0202428067736	0.00821945687161308	Up
Camkk1	2.01660032903448	0.0495363061365081	Up
Tcf7l1	2.01608344440883	0.00712139013595043	Up
Camk2b	2.01564177705494	0.00241192816233321	Up
Abcc9	2.01535652810971	0.00551288656572776	Up
Casq2	2.01515396533985	0.0276197639106824	Up
Ncam1	2.01414396394986	0.000297821162913212	Up
Dnajc1	2.01400463715107	5.47199711598643e-05	Up
Sdc2	2.00875664039323	0.00615532897414659	Up
H1f10	2.00839208673268	0.033495734381044	Up
Bhlha15	2.00828507437935	0.00768202919092469	Up
Rasgrp3	2.00822868013704	0.0156843330251968	Up
Ccdc134	2.00732921832234	0.014986571306825	Up
Limch1	2.00542948127614	0.0475361784134329	Up
Tada2a	2.00511976749884	0.0184197275765748	Up
Ndrg2	2.00497818998298	0.00038208814059318	Up
Tead2	2.00430445992221	0.021035824967876	Up
Ppp2r2b	2.00420078305476	0.0215108169827511	Up
Tshz3	2.00119109690369	0.00531652902796705	Up
Gnai1	1.99899583961035	0.0132548280823384	Up
Mx2	1.99827261816151	0.0431552718884491	Up
Klhl33	1.99596115184203	0.0399569253753491	Up
Sun1	1.99475175637661	0.0182563120791914	Up
LOC118568205	1.99106157061125	0.0106032216445973	Up
Mical3	1.98730326313881	0.0181031969473347	Up
Atp7a	1.98179357039628	0.0137637364683704	Up
Rbpms	1.97970971890285	0.00133750414996523	Up
Zfhx2	1.97857267805595	0.00503380711350259	Up
Ro60	1.97821054358591	0.00957363048246748	Up
Cln3	1.97767330766918	0.0134631966279854	Up
Msantd2	1.97725586472185	0.00662294348147903	Up
Clmp	1.97596345636178	0.000660583620687104	Up
Pwwp3a	1.97487513066064	0.00229735126266015	Up
Plk2	1.96892882553055	0.00731557236491256	Up
LOC118567335	1.96880915940111	0.00313023132688548	Up
Pitpnm2	1.96532162315813	0.00620735649877785	Up
Zeb1	1.96512101423405	0.00114690716969418	Up
Ppan	1.96398489690977	0.00282384424944965	Up
Stox2	1.96304459527252	0.00976243415715724	Up
Fhod1	1.96129310001074	0.0392658445663192	Up
Cxxc5	1.95968466683723	0.0104039471596874	Up
Dgkh	1.95802155741579	0.0055660122768911	Up
Sobp	1.95731146537602	0.0450831143871245	Up
Tpm2	1.95398635664001	0.000990920625750682	Up
Aopep	1.95181682880405	0.0127784262892189	Up
Car5b	1.95130153525847	0.00835924294307677	Up
Dmwd	1.95011393397977	0.0238131886291381	Up
Lrrc3	1.9480381791161	0.0191149624737502	Up
Ephb2	1.94740845178155	0.0232443896688915	Up
Cpe	1.94726275407352	0.00527456923583156	Up
Nexn	1.94479948066419	0.0107570774960536	Up
Trps1	1.94327380095721	0.0268455737295063	Up
Kcna2	1.94151199505413	0.00577314351225299	Up
Prpf39	1.94150716674091	0.0215975801846441	Up
Syt7	1.93894538761251	0.0197394280360065	Up
Dlg4	1.93873136941685	0.0368561112789043	Up
Bicc1	1.93422009873272	0.00516476049739986	Up
Tbkbp1	1.93274154502401	0.0105922530226664	Up
Apbb3	1.93204353188779	0.0363886876289655	Up
Mdn1	1.93189987380127	0.0421922844567502	Up
Qsox1	1.93070810646752	0.00290267288154705	Up
Arhgap33	1.92996930752288	0.0462801435353825	Up
Col15a1	1.92734401891014	0.0387057960395881	Up
Rrnad1	1.9263288288802	0.0128054626675973	Up
Hand2	1.92554710831305	0.0263618159874805	Up
Slc8a1	1.92434947666648	0.0121174828270803	Up
Eif4g3	1.92416816002505	0.00713338911355766	Up
Slc38a1	1.92354112250911	0.0115069837972825	Up
Eva1b	1.92327747633772	0.0432443230826567	Up
Prelp	1.92272401075866	0.00950085618596669	Up
Dusp22	1.92221951854633	0.00887918674772663	Up
H2-M2	1.91941513729377	0.0161825169724733	Up
Tubgcp5	1.91896610103162	0.0180705705306857	Up
Steap2	1.91822002597933	0.00889699253556179	Up
Ttc14	1.91784862650728	0.00970449286169592	Up
Slc38a2	1.91688626037782	0.021177814033583	Up
Ccdc107	1.91362936088671	0.0152626380879233	Up
Tspan2	1.91209730053013	0.0175125194321805	Up
Bclaf3	1.9118393442767	0.0280040078376753	Up
Rbms1	1.91109488360179	0.000437422445951815	Up
Repin1	1.91040095234457	0.0277196757899734	Up
Pomgnt1	1.90820889030135	0.0142999499995063	Up
Leng8	1.90430068381997	0.00237178278482973	Up
Wipi1	1.90297748337925	0.0196196838257461	Up
Syne1	1.90074775754259	0.00259915426906614	Up
Spindoc	1.90060418434608	0.000691273414992444	Up
Dock7	1.89661770229592	0.0121078769454496	Up
Lims2	1.89285174781728	0.0100222183517452	Up
Gnao1	1.89210019632309	0.0104846773561901	Up
Esyt2	1.89184859088292	0.00155068949820176	Up
Prr12	1.89124210557045	0.00123533157373938	Up
Slc20a1	1.89118241928763	0.0146765284549101	Up
Zfp950	1.89072496199328	0.0203357018964508	Up
Stoml1	1.88818709488122	0.00859261359103844	Up
Clk4	1.88794222643492	0.0171207827103607	Up
Lyrm9	1.88764422095866	0.014361830240119	Up
Rasl11b	1.88511361849336	0.0151494309730277	Up
Kat2a	1.88478240140742	0.00369751887948527	Up
Plau	1.88099494019002	0.042740818812881	Up
Tmem161a	1.88087073382614	0.00973559561697829	Up
Pkdcc	1.87811344187071	0.00417188738974488	Up
Dph6	1.87626471583559	0.0117483797198512	Up
Zfp629	1.87004721223959	0.0138987017159351	Up
Des	1.86986746588561	0.000529070320865957	Up
Rgl2	1.86863369211216	0.00813071077114587	Up
Zbtb46	1.86817233060753	0.0438764342884498	Up
Pygo1	1.86695763917863	0.0182202154650519	Up
Camkk2	1.86314014865307	0.0103260950581391	Up
Zfp932	1.86256462870461	0.0413718794659863	Up
Slc25a42	1.85946074191635	0.0194800627364778	Up
Rgs7bp	1.85897098685735	0.000606536973616709	Up
Wls	1.85886579019523	0.0135673485137246	Up
Map4k2	1.85813816383406	0.00837250566537779	Up
Rint1	1.85809754425937	0.0177521024314527	Up
Tgfb1i1	1.85690553643759	0.00334811827111634	Up
Rhobtb1	1.85671840948116	0.0295536339109383	Up
Snhg17	1.85659204301904	0.0325619494091677	Up
Nrros	1.85489120116159	0.00998585519575418	Up
Myh10	1.85417781917651	0.017793748912511	Up
Mmachc	1.85284520205948	0.0495636018570955	Up
Tcp11l2	1.85191023334635	0.0130240927791573	Up
Pcolce	1.85155378124918	0.00863265704698583	Up
Fbxl22	1.85121664065359	0.00609753747482413	Up
Rasal3	1.85027482785445	0.042755271820463	Up
Pecam1	1.84994751791557	0.008979763970146	Up
Maml2	1.84985540043207	0.009078472669321	Up
Camk2g	1.8490919949885	0.00845488362766426	Up
Akap1	1.84825268102387	0.018478482965382	Up
Usp53	1.84772567776841	0.0184613459015079	Up
Cpq	1.84759398227683	0.0184059143197948	Up
Sgpp1	1.84745871695466	0.0368240217319294	Up
Amotl1	1.84618429553939	0.00111147697643268	Up
Optc	1.84556203462099	0.00552130102280139	Up
Rnf149	1.84533049525697	0.0325527389674267	Up
Timp2	1.84507103846175	0.0163868578876808	Up
Ocrl	1.8435735862803	0.0199968756584146	Up
Smpd4	1.84322311573661	0.00632752072575167	Up
Zfp142	1.84255933944326	0.0277653632253656	Up
Igf1	1.84056854486807	0.0127522549554297	Up
Pfkm	1.83981097411186	0.0380558110205509	Up
Cbx6	1.83975237933784	0.00261795636064186	Up
Macf1	1.83902613020129	0.0086251770868326	Up
Rsu1	1.83863363829265	0.00206298326560431	Up
Szt2	1.83777733201814	0.0206455437932327	Up
Mprip	1.83776329233562	0.00758865095801901	Up
Tmed5	1.83738843641054	0.00583440977164974	Up
Aoc3	1.83615933721672	0.0287555625099936	Up
Numbl	1.8360466062973	0.0404563384699553	Up
Eef2kmt	1.83387370111274	0.0027331569412068	Up
Slc2a1	1.83216976018078	0.0319848808215951	Up
Hoxc8	1.82871210050981	0.0251405974725315	Up
Dtna	1.82846396203324	0.0167344680080362	Up
Trip6	1.82659175456218	0.0166451092849888	Up
Mapk8ip1	1.82603914078869	0.0249546066844302	Up
Foxf1	1.82420266493618	0.00320834454371773	Up
Pbx1	1.82413501718304	0.00280251611296393	Up
Sgsm1	1.82208637162149	0.029198188533555	Up
Sorbs2	1.81996280775681	0.0188793983055036	Up
Uxs1	1.81606944776998	0.0374113674439524	Up
Rab3c	1.8156958221346	0.00339687829049321	Up
Klhl26	1.81543770935982	0.0260312047511315	Up
Ccl21a	1.81252168432377	0.0138457186961381	Up
Kirrel	1.81152750684889	0.010217861167617	Up
Lgals1	1.80751463809038	0.00111742084862297	Up
Tnip2	1.8057229764205	0.0174674843008187	Up
Ubr2	1.80409489914162	0.012378320204777	Up
Sac3d1	1.80370689895785	0.043479901495328	Up
LOC118567558	1.80354420137533	0.0131912557400456	Up
Pkd2	1.80350125633199	0.0328381962167162	Up
Tpp1	1.8023076415809	0.0268755430505377	Up
Hspb1	1.80161503697157	0.0080552245772515	Up
Bicd2	1.80064349856307	0.0460532302162613	Up
Atp13a1	1.79600442548829	0.0142920702078616	Up
Wdfy1	1.79588414772222	0.00869753762125675	Up
Trim11	1.79516246014893	0.0272760343906063	Up
Rai1	1.7949756889684	0.0194810552806765	Up
Npnt	1.79415588674178	0.0177417891796026	Up
Gfra2	1.79328970192722	0.0498600776580628	Up
Plekhg3	1.79231815854033	0.00936162270790491	Up
Hspa2	1.78888548924431	0.020571731873081	Up
Rtl8b	1.78833915502346	0.0161502761521542	Up
Nqo1	1.78763669256404	0.0148000362664775	Up
Dkk2	1.78621168764837	0.0394954902606569	Up
Tubgcp3	1.78399968238573	0.0193384241747005	Up
Tecpr1	1.78175094032492	0.000727864383648685	Up
Slc25a23	1.78091184462225	0.00554587144546027	Up
Ivd	1.78060302002364	0.00952543440723685	Up
Pnliprp2	1.77679999846837	0.0169765961179059	Up
Col5a1	1.77671364487351	0.00717033687381812	Up
Igfbp7	1.77667178111652	0.00805414908141093	Up
Lime1	1.77554683539793	0.0323379546993975	Up
Ptprt	1.77494383518129	0.0375225380042011	Up
Spire1	1.77486436986821	0.0459575380549505	Up
Sun2	1.77288440810163	0.0175870154874931	Up
Parp3	1.77257628929847	0.0241148074652696	Up
Fxyd6	1.76602025044301	0.00411511880694919	Up
Ly6c1	1.76325349741958	0.0157363878808066	Up
Trerf1	1.76148415321727	0.0367422339829895	Up
Clk2	1.75744763077829	0.0355353081982894	Up
Sod3	1.75423007592278	0.00759534274930582	Up
Nxn	1.7512606332785	0.0389980014316184	Up
Sdc3	1.74864187495019	0.0198724947726539	Up
Jph2	1.74863956590854	0.006497160086331	Up
Bco1	1.7477429419217	0.0403662568895323	Up
Vars2	1.74409180079507	0.0442631397680372	Up
Pcgf2	1.7436295225526	0.0115773491728861	Up
Esrrg	1.74320516804632	0.0307426280399729	Up
Pisd-ps1	1.74265427287899	0.0358661506203327	Up
Flt3l	1.74199022225659	0.0194787909450346	Up
Pcnx3	1.74152388292102	0.0144055274625914	Up
Ifi203	1.74088972424074	0.00555117354913727	Up
Tcf4	1.73901700529691	0.000522151817790078	Up
Themis2	1.73545600236701	0.0473860861296125	Up
Rbms3	1.73361510110917	0.00254781768064521	Up
Rrp9	1.73178560595129	0.0351377342079111	Up
Svil	1.7305815456369	0.038139227858484	Up
Akr1b10	1.73044459869389	0.0169651124406544	Up
Col4a2	1.73043300899903	0.0186181380017735	Up
Nt5c3b	1.72847186037586	0.0249511297261581	Up
Itpkb	1.72824477508835	0.00768454586294673	Up
Plac9a	1.72792752751568	0.00578601495893808	Up
Ifi27	1.72789412818836	0.0101224589122132	Up
St7l	1.72760318788662	0.0461350269317312	Up
Hdac10	1.72616877794661	0.0290470602478306	Up
B3galnt2	1.72477319301229	0.031106151510212	Up
Sema7a	1.72465018998563	0.0315220505353469	Up
Top3b	1.72355078696665	0.00681164898735611	Up
Snx19	1.72353740454762	0.00850023980272676	Up
Samd4	1.72347982460027	0.0175904106562207	Up
Ogn	1.72184668810349	0.0187224604450234	Up
C1s1	1.72134312731366	0.0229164224069997	Up
Ppp1r14a	1.72120344020366	0.0156082660694635	Up
Cd59a	1.71870072302455	0.0120973351034869	Up
Ogt	1.71756731638896	0.0149801730380762	Up
Thap3	1.71646949369184	0.0195329368806001	Up
Cavin3	1.71611338616375	0.0218570550838262	Up
Kank2	1.71468827178577	0.00670908553774501	Up
Nr2f2	1.71466258689638	0.0305344176909108	Up
Emilin1	1.71346691376056	0.030525783059099	Up
Sgsm3	1.71136190248443	0.0164694781897378	Up
Slc44a3	1.70843432157124	0.0307751535432845	Up
Pld3	1.70755061304555	0.0225388441164778	Up
Odr4	1.70680919165371	0.0320356167046833	Up
Gsta4	1.70433887919437	0.000463247236255907	Up
Reep5	1.70386155519281	0.0109091454883735	Up
Fnbp4	1.7024668664077	0.00486182850519527	Up
Znrd2	1.70108764128371	0.0405736071122675	Up
Paics	1.6993980769136	0.00377768684170339	Up
Zfp811	1.69858808853334	0.0310505008308968	Up
Pnpt1	1.69854158563885	0.0196275541462991	Up
Msrb3	1.69826741394158	0.00216354334231284	Up
LOC118568508	1.69826081887025	0.0390951380720194	Up
Cygb	1.69695394006726	0.000579268933035663	Up
Clpb	1.68947480015574	0.0198074875238788	Up
Peli2	1.68876401086644	0.0257952103691849	Up
Zfp970	1.68542853977296	0.0270424427584377	Up
Znrf1	1.68448308121237	0.0205955771799507	Up
Clec3b	1.68384732667842	0.0322685196034502	Up
Myo9b	1.68298207765638	0.0104531270790849	Up
Rph3al	1.6825574730794	0.0292537526807409	Up
Mustn1	1.68227741232711	0.00975435833555907	Up
Plscr4	1.67953771540258	0.0352985601594117	Up
Hspb7	1.67870324291447	0.0400961504572036	Up
Fam171a1	1.67816870476989	0.0450394525384441	Up
Lemd2	1.67744864615766	0.00779596743151363	Up
Tox2	1.67531386335667	0.0131939268940309	Up
Mettl7a1	1.67475082836731	0.00964498033017634	Up
Synpo2	1.67415071469074	0.00215488078219921	Up
Plekhm2	1.67283314710229	0.0381442175781639	Up
LOC118567721	1.67193017084312	0.00719536722808475	Up
Tdrd3	1.67086955907922	0.0104256217562049	Up
Tecr	1.66758853824714	0.00319912587963389	Up
Antxr1	1.66645404340543	0.0339512392369223	Up
Nid1	1.66494492694081	0.0257811257311649	Up
Akap12	1.66443929397256	0.0208276923817233	Up
Glul	1.66029553462141	0.00317371690933948	Up
Gpr108	1.65806017520702	0.0302369089240221	Up
Zfp329	1.65686709983127	0.024484937967624	Up
Nenf	1.65508221216323	0.0231891422711089	Up
LOC118568226	1.65395381802602	0.0364440626114127	Up
Snx33	1.65377168901264	0.0394077690756909	Up
Prickle2	1.65022050539359	0.0492324799013588	Up
Myl9	1.64678387226506	0.00237756806458685	Up
Hdac7	1.64509971731717	0.0282263773797425	Up
Zfp318	1.64467970372367	0.0253079344140141	Up
Tor1b	1.64460701228746	0.0234024374388213	Up
Cxxc1	1.64339340763554	0.00574494603662363	Up
Impdh1	1.64241758838603	0.0375139682262586	Up
Bckdha	1.63522324172216	0.00247635023821794	Up
Dbt	1.6335387029639	0.000753447267738622	Up
Efemp2	1.63102404762602	0.0274374514296394	Up
Foxp1	1.63047968069994	0.00451498286858899	Up
Poglut3	1.62952057358894	0.0412516152662015	Up
Vcl	1.62898249277346	0.0139999609512237	Up
Zfp113	1.62817273294564	0.0153904237902105	Up
Col6a1	1.62653524862974	0.0120579238967919	Up
Col3a1	1.62357913911458	0.0197271726213143	Up
Katnal1	1.62170346857174	0.0184517816952506	Up
Slc12a2	1.62120529630088	0.0322270754654214	Up
Slc35d1	1.62056886693636	0.0326545358810423	Up
Fan1	1.6147106768742	0.0155221100859099	Up
Satb1	1.61329706103661	0.0270106441486852	Up
Tnk2	1.61271532541165	0.000905962499873072	Up
Lzts2	1.6122356347233	0.00433518343514126	Up
Nsmaf	1.6113956719579	0.0130327373779821	Up
Fstl1	1.60839467677325	0.0270896557808396	Up
Hbb-bs	1.60514205491348	0.0390645482695923	Up
Basp1	1.60448164796457	0.0118757170627245	Up
Plxna1	1.60419412796184	0.0483967516092761	Up
Ptpn7	1.59866081140688	0.0255424626322555	Up
Fbf1	1.5978344068305	0.0318282429178058	Up
Cdin1	1.59585435252699	0.0282405327396743	Up
Tnrc18	1.59562998651522	0.0199334024977924	Up
Nat10	1.59231385894372	0.0245700019473455	Up
Ncor2	1.5887122519234	0.00934154910651528	Up
Cybc1	1.58707116070398	0.0175008862434363	Up
Pdzrn3	1.58512531062677	0.0496824101754591	Up
Zbtb4	1.58397272032133	0.00930508325599986	Up
Tcrb	1.58304447721553	0.0249224619343195	Up
Cdc42ep3	1.5768909268199	0.00761975964435899	Up
Ppp1r12b	1.57312315830452	0.0120144489533599	Up
Map11	1.57169798539372	0.025482200605567	Up
Pitpnc1	1.57120170559399	0.0201724619587151	Up
Lsp1	1.57046118836329	0.000738589003829046	Up
Capn2	1.56793035500495	0.0290335688376343	Up
Timm50	1.56783294106647	0.0456469797537443	Up
Rbm15	1.5651511454312	0.0272985312386447	Up
Cped1	1.56486609618986	0.014429280000895	Up
Rpgrip1	1.55930242262859	0.0471051787525781	Up
Sel1l	1.55673164823623	0.0495826077412125	Up
Rhoj	1.55564569003027	0.00202096411787733	Up
Ldlrad4	1.55314512319458	0.0285202998482732	Up
Itgav	1.55222278149014	0.0109501373021848	Up
Btbd3	1.55193583205736	0.0271371190421375	Up
Arhgap29	1.55154613919179	0.0303835480314344	Up
Anks3	1.54849439287752	0.0315840769162145	Up
Ltbp4	1.54677010261597	0.0273333727742204	Up
Epb41l1	1.54612276044693	0.043027223614941	Up
Dab2	1.54561759962381	0.0215314286140095	Up
Gigyf1	1.54430128743317	0.0166142529148941	Up
Rgl1	1.54363088200012	0.0219053935683572	Up
Rabac1	1.54055279709317	0.00943333551607391	Up
Plekhb1	1.53312576235937	0.0331824029387864	Up
Paxbp1	1.53192638953584	0.0465624849821172	Up
Cav1	1.52987653474598	0.0321515417651701	Up
Rras	1.52675705621577	0.00856817001242785	Up
Dmpk	1.52521623337095	0.0128120965138553	Up
Ccdc85b	1.5234055304269	0.0304361612904672	Up
Gsn	1.52000057498015	0.0144300095795385	Up
Wwc2	1.51969391505754	0.0220078742847022	Up
Dennd1a	1.51961242380503	0.042098804799883	Up
Piezo2	1.51584555423407	0.0427339243799983	Up
Zfp651	1.51474406934512	0.0373499580566458	Up
Wdfy3	1.51413913159749	0.0310360060802217	Up
Mt2	1.51344207711629	0.00443360587591275	Up
Map1b	1.51290556491525	0.00367795333074878	Up
Zfp281	1.51208814066837	0.0359284298280421	Up
Gpx3	1.51204786166211	0.00655500950195187	Up
Glg1	1.51125589934415	0.0336894097822118	Up
Ankrd10	1.51046991979087	0.0272170493524069	Up
Csrp1	1.50589071592156	0.00707040761992922	Up
Lss	1.50354973632376	0.0381682236370413	Up
Grk5	1.50315419031679	0.034273361520367	Up
Phf21a	1.4999617716341	0.00687061205476376	Up
Nfat5	1.49712011752907	0.0344544191492463	Up
Tmem214	1.48949933578242	0.0355105747567781	Up
Clk1	1.48780945698864	0.0150357228720076	Up
Axl	1.48725652991348	0.0459001419379273	Up
Abca7	1.48272829283725	0.0205888172843005	Up
Phldb1	1.47781309910405	0.0163544595073065	Up
Inf2	1.47593185822639	0.0490792702890939	Up
Il3ra	1.47305991500086	0.0262567451162125	Up
Rpl17-ps3	1.47226901285427	0.00973541463084765	Up
Septin6	1.47082682810503	0.0134123872989018	Up
Mmp14	1.47045571744676	0.0015722638452133	Up
Itgb1	1.4692959738811	0.0195863239241879	Up
Zbtb2	1.46588453170017	0.0398986726024741	Up
Csad	1.46528700389483	0.0323087032580728	Up
Ly6a	1.46409059230364	0.0085178018112092	Up
Slc9a8	1.46302539317566	0.0328892432819712	Up
Septin4	1.45664407804922	0.0252864772154591	Up
Gem	1.45340786419561	0.0240225449764842	Up
Zdhhc2	1.4524353264644	0.0381113082249768	Up
Tmed9	1.44874532655235	0.0337298845994316	Up
Rnf25	1.44874121348379	0.0424803838355161	Up
Cacnb3	1.44848658564671	0.0412857483960074	Up
Slc48a1	1.43673294578477	0.0182043804493188	Up
Tsc1	1.43668998378202	0.0218830834060303	Up
Pycr2	1.43620443938295	0.042107370880117	Up
Uqcc3	1.43507822208874	0.029690932221797	Up
Pan2	1.43309203141974	0.0288613132953028	Up
Pdgfa	1.4329785870213	0.0240362064053473	Up
Stard13	1.43147383534319	0.0332400678850075	Up
Nkd1	1.42873230111741	0.0410813015996678	Up
Pick1	1.4257330156446	0.0270318125393501	Up
Fhl1	1.42302941371599	0.00901597646686233	Up
Grn	1.42268600435367	0.0142065835314228	Up
Clasrp	1.42201710652477	0.0275264337348105	Up
Gramd4	1.42032856650702	0.0244830776677853	Up
Nxf1	1.41977803218639	0.0365486834671596	Up
Oxct1	1.41578620015825	0.00610688067949578	Up
Ifitm1	1.41556809248183	0.0473502280157407	Up
Hspb6	1.40808222916915	0.0427254782780413	Up
Rdx	1.40765943596125	0.00205637696561495	Up
Fxyd5	1.40602207194126	0.0354526406610806	Up
Ptp4a3	1.40543315633906	0.00970839546875099	Up
Psd	1.40475636672055	0.0258652137946962	Up
Bin1	1.40382787156593	0.0360040069363976	Up
Tgfbr2	1.39983209360932	0.0124843339993658	Up
Ssh2	1.39727716740565	0.0381164534243284	Up
Smim12	1.39115496731124	0.0365797124143571	Up
Nfic	1.38878746412111	0.0350434779222731	Up
Zfp395	1.38865284338014	0.0379142174664762	Up
Kmt2a	1.38859470828599	0.0325528549905767	Up
Vti1a	1.38714323820891	0.0312778286439277	Up
Atp1b3	1.38698222274712	0.0194577724330993	Up
Trmt1	1.38688252426994	0.0215654008727662	Up
Slc8b1	1.38257217065512	0.0213202072251448	Up
Csf2ra	1.37956550215678	0.0333185312982475	Up
Plce1	1.37790081282553	0.0494802988155511	Up
Lmo4	1.37586922216168	0.00947998472392134	Up
Tcf20	1.37199785870375	0.048502565877824	Up
Cryab	1.37170299942402	0.0340172915139145	Up
Mms19	1.36834796831501	0.0134026166264062	Up
Dcn	1.36725172585435	0.0101418572538082	Up
Cavin1	1.36694255507251	0.00381732375687636	Up
Col6a3	1.36686752632804	0.0412147325033159	Up
Mdm4	1.36610620607428	0.0128712131343305	Up
Ly6e	1.36562577562552	0.00284932317971517	Up
Cst3	1.36256283686366	0.0423910341589865	Up
Kat6b	1.35710323863385	0.0336194859348855	Up
Arrb2	1.35510131951356	0.0319328168058243	Up
Synm	1.35100192705631	0.0458849803830108	Up
Tmx2	1.34506388561887	0.0300699853386607	Up
Pde2a	1.34171446612881	0.0389763040595909	Up
Dynll1	1.34140753410551	0.00292557285482108	Up
Son	1.33183816295592	0.0394124250491797	Up
Cracr2b	1.32775787609025	0.0421359492282702	Up
Rsrp1	1.32492901103161	0.00797334671988784	Up
St6galnac2	1.32476687671114	0.0488806787962745	Up
Igfbp4	1.32421144633805	0.018321328034615	Up
Rhno1	1.31921484025115	0.0205437951055349	Up
Trrap	1.31116761358837	0.0243251697616823	Up
Emsy	1.30627905447443	0.0277701574688181	Up
Itgb5	1.30495116579785	0.0325472033588682	Up
Taok2	1.30307689377754	0.0130398693478961	Up
Dguok	1.3030628992837	0.0415987565485723	Up
Cuedc2	1.29912193673169	0.0319810886465305	Up
Ypel3	1.29554647750406	0.0367516380387157	Up
Snhg18	1.29490264459859	0.0224709094973219	Up
Kdm4b	1.29483691014098	0.0470508716412654	Up
Plk1	1.29440229052367	0.0383867158614426	Up
Sparcl1	1.29056872002122	0.0392239911341655	Up
Pwwp2a	1.29031749002308	0.0301174402965748	Up
Nsmf	1.28876338063473	0.0496923266352525	Up
Gng5-ps	1.28876015942402	0.0231955730179675	Up
Dpysl3	1.28829641772253	0.0238722465422535	Up
Plekho1	1.28680516331608	0.0318188946101491	Up
Uqcc2	1.28589198618512	0.0389094198073365	Up
Cd47	1.28087280022036	0.0185872272602642	Up
Slc25a4	1.27635318184491	0.0128516522518348	Up
Gbp2	1.2746636283439	0.0156416736734804	Up
Eid1	1.27260928295034	0.0133560048926289	Up
Hoxb4	1.27223948144762	0.0459143707824118	Up
Prmt1	1.24655194220137	0.0102217431020311	Up
Akap8	1.24613685898914	0.0396031867601528	Up
Sh3bp1	1.24130300179907	0.0378752864043355	Up
Tanc2	1.24108168246272	0.0478441138339602	Up
Chd8	1.23851650956296	0.0491733878801832	Up
Col6a2	1.23645993641294	0.0157899828768415	Up
LOC118568526	1.23272786113506	0.0407121759436046	Up
Tmprss2	1.2300868100777	0.0274350100735642	Up
Atf6b	1.22851234591137	0.03106354924893	Up
Mybbp1a	1.22609217459771	0.0276317072931541	Up
Sfswap	1.22498233690557	0.0320829469140246	Up
Ftl2-ps	1.22201278279389	0.0251215996461867	Up
Sdc4	1.22122556125191	0.0293981320167058	Up
Niban1	1.21778590752106	0.0454869292501938	Up
Ncapd2	1.21772466323641	0.0333509079719875	Up
Bscl2	1.2154023846876	0.0262734012874578	Up
Adi1	1.20544471472641	0.0487597973461777	Up
Zc3h7b	1.20312904201465	0.0330898883341144	Up
Socs2	1.20206257098701	0.0260243496021422	Up
Rpl37rt	1.20194883066587	0.0324177833958994	Up
Map1lc3a	1.20050464062589	0.0463650352186811	Up
Ctbp2	1.19760666022695	0.0219628433759929	Up
Taf4	1.19484278778882	0.0352349469951506	Up
Tmem223	1.19137892619959	0.0487681855578388	Up
Fnbp1	1.19106304879118	0.041332892231152	Up
Ifitm3	1.18042188282199	0.0382245814813444	Up
Cd63	1.17786720263768	0.0267277912683004	Up
Ehd2	1.17433624329503	0.0377279600209248	Up
Prkcb	1.17385935336435	0.0446561047503611	Up
Bnip2	1.17062634462762	0.0465924707910424	Up
Gsta1	1.16325237057255	0.0238280314036519	Up
Zc3h7a	1.16307973346155	0.041122455573812	Up
Nfia	1.15952315179416	0.0264747343278547	Up
Cald1	1.15629037652617	0.0144929706860881	Up
Atp2a2	1.15626503146768	0.0498366028566116	Up
Ssbp3	1.15401578160141	0.016480751545444	Up
Prkacb	1.15298252202212	0.0413218177632551	Up
Atp6v0b	1.14823110692012	0.0279587972631395	Up
Txnip	1.13837403087004	0.045029910467735	Up
Ppp2r3d	1.12331736330014	0.0458549115173374	Up
Flot1	1.12240906294404	0.0482188577677912	Up
Parva	1.11282365206576	0.0464702073928968	Up
Snrnp70	1.10557481622299	0.017414131194699	Up
Pde4d	1.10408619620763	0.0332273442759947	Up
Rpl31-ps8	1.10051173089934	0.0449213176926757	Up
Mfsd4a	1.08670138674822	0.0287781205606212	Up
Dlc1	1.08448020757691	0.0432369355972	Up
Msn	1.08396106641117	0.0481335307396831	Up
Oaz2	1.07825500456611	0.0211111648818184	Up
Cnn2	1.07745511357129	0.0239898014342152	Up
Naca	1.07524823584467	0.0342176932587268	Up
Hip1	1.06650555528275	0.0399294478781106	Up
Sf3b1	1.0624120417784	0.0424553728055993	Up
Atf5	1.04606688947071	0.0228938287697947	Up
Ubc	1.02218155679832	0.0322552272156171	Up
Celf2	1.01453520288236	0.0457023299545541	Up
Mkln1	1.01297073861534	0.0397623105075545	Up
Deptor	1.00857135813533	0.0427242785730447	Up
Nr2f1	3.81072	0.000408245350787783	Up
Postn	3.28819	2.17743118618258e-05	Up
Nr4a2	2.84163	0.00498238053606743	Up
Parp8	2.18925	0.00621899148112976	Up
Dock9	1.64394	0.0156326887096506	Up
Angptl2	1.5298	0.0363454451030325	Up
Zdhhc17	1.33097	0.0381927500036622	Up
Tbc1d20	-1.00074	0.0318811133672032	Down
Ypel5	-1.00341	0.0358846266532688	Down
H3f3a	-1.01278	0.0237756237037281	Down
Got1	-1.01462	0.0429047798137464	Down
Rab10	-1.01683	0.0205272884872676	Down
Micu1	-1.01699	0.0421202777973985	Down
Secisbp2l	-1.01908	0.0482747788996481	Down
Tob1	-1.01944	0.0281897637672946	Down
Zbtb7b	-1.01955	0.0182285245369302	Down
Mapk13	-1.02031	0.0239500173033315	Down
Ldb3	-1.02168	0.0268029234817235	Down
Tep1	-1.02479	0.0487331484940594	Down
Ap3b1	-1.02792	0.034227321783459	Down
Mcl1	-1.02969	0.0205547643413346	Down
Cltc	-1.03321	0.0264790821937903	Down
Rbm47	-1.03355	0.0239898253309089	Down
Pdlim5	-1.035	0.0282819794668906	Down
Cyb561	-1.03501	0.047428992891158	Down
Lima1	-1.03523	0.0271106303718992	Down
Becn1	-1.03537	0.0422976498755929	Down
Lratd2	-1.03901	0.0314626072833231	Down
Ist1	-1.03949	0.0442709329497743	Down
Mical1	-1.04045	0.045162994789055	Down
Jpt1	-1.04085	0.0481210587835271	Down
Csnk1a1	-1.04106	0.0165616968332793	Down
Tet3	-1.04136	0.0341725492133549	Down
Tspan3	-1.04274	0.0433120683641757	Down
Uap1	-1.04375	0.0241402415537325	Down
Capza2	-1.04584	0.0177674445945436	Down
Stx12	-1.04753	0.0383874412134852	Down
Cebpg	-1.04892	0.0339489762341757	Down
Vapa	-1.04985	0.0179442360155626	Down
Bcl10	-1.05554	0.0466814785079112	Down
Gpd1l	-1.05728	0.0280720197547717	Down
Fam32a	-1.05797	0.0348834268628372	Down
Xrn2	-1.06137	0.0461559568623418	Down
Slc25a36	-1.06166	0.0416694986007578	Down
Tbrg1	-1.0645	0.0448331260839872	Down
Stx3	-1.06617	0.0328220984690872	Down
Zmiz1	-1.06747	0.0153668524174894	Down
Cdc25a	-1.07301	0.0317746921290979	Down
Pkn2	-1.07518	0.0333022120009411	Down
Abcd3	-1.0753	0.0228848701726894	Down
Anxa11	-1.07542	0.0146870431115644	Down
Cystm1	-1.07819	0.00805022490082228	Down
Atp5g3	-1.07824	0.019473493354785	Down
Wsb2	-1.07928	0.0315161570655576	Down
Stk24	-1.08366	0.0168017388821632	Down
Ctnnbip1	-1.08447	0.0447565928966564	Down
Eps8l2	-1.08477	0.0137187096884526	Down
Surf4	-1.08572	0.0117210891158201	Down
Cited2	-1.0861	0.037836303063573	Down
Atp6v1e1	-1.0895	0.0278688562612976	Down
Dlg3	-1.08986	0.0213235222930254	Down
Sec31a	-1.09129	0.0201051275940204	Down
Slc25a5	-1.09239	0.049653417690454	Down
Rnf114	-1.09465	0.0337776583413491	Down
Cat	-1.09587	0.00758524644565857	Down
Mapk1	-1.09739	0.0172433056129473	Down
Vat1	-1.09949	0.0203112628765037	Down
Bach1	-1.09972	0.0347069404247326	Down
Aldh1l1	-1.10339	0.0268003835419894	Down
Psme3	-1.10388	0.0363807057222919	Down
Lasp1	-1.10445	0.0190420575657915	Down
Hipk2	-1.10464	0.00623332807338624	Down
Hpgd	-1.10528	0.0253013555381016	Down
Rps6ka1	-1.10847	0.0388259526554236	Down
Atp8b1	-1.10883	0.038596936678649	Down
Nars	-1.10944	0.0189528727509339	Down
Pbld2	-1.10948	0.0390382397234406	Down
Brpf3	-1.11103	0.0192047597196779	Down
Ezr	-1.11141	0.00331703847089683	Down
Hook1	-1.11244	0.0474473563553243	Down
Mast2	-1.1164	0.0145376176395791	Down
Acbd4	-1.1173	0.0355464470231736	Down
Atxn7l3b	-1.11853	0.0048143831464635	Down
Tpd52	-1.11989	0.0298334076064539	Down
Tnpo1	-1.12011	0.0340532911448893	Down
Pgk1	-1.12341	0.0493929374225317	Down
Itch	-1.12394	0.0223259228750672	Down
Ubap1	-1.12424	0.0338221789172693	Down
Mvp	-1.1263	0.0334201290607505	Down
Coa5	-1.12727	0.0303504957157699	Down
Arhgap18	-1.12939	0.0458607268591529	Down
Ube2l6	-1.132	0.0475184063528737	Down
Gclm	-1.13366	0.0392480759434961	Down
Gramd3	-1.13404	0.0484252533176494	Down
Pank3	-1.13726	0.0260053326117967	Down
Klf4	-1.14097	0.0116638449975888	Down
Gosr1	-1.14296	0.0202718340578775	Down
Calm3	-1.1463	0.0115149145834217	Down
Actr3	-1.14991	0.0211300880450493	Down
Etv3	-1.15137	0.0391918401558857	Down
Lats1	-1.15213	0.0266567084057491	Down
Fbxl3	-1.1532	0.0222219296815836	Down
Tmf1	-1.15351	0.0387029240956104	Down
Ndrg1	-1.1548	0.0253144341956577	Down
Ptprh	-1.15501	0.0440506705371567	Down
Atp1b1	-1.15624	0.0142606360033524	Down
Sec22b	-1.1565	0.0456787776638039	Down
Ahcyl1	-1.15691	0.0252670707201708	Down
Tent4b	-1.15734	0.0294780438667328	Down
Usp25	-1.1582	0.0291639729565308	Down
Selenot	-1.15948	0.0213530042042092	Down
Calm1	-1.16032	0.0105016450323005	Down
Tbc1d10b	-1.16281	0.0106024650339164	Down
Pitpna	-1.16438	0.00743026085644079	Down
Galnt6	-1.16504	0.0465891106818826	Down
Peak1	-1.16535	0.0253180002128808	Down
Dda1	-1.16682	0.0335375016924602	Down
Naa60	-1.16825	0.0253485381135186	Down
Ctnnb1	-1.17094	0.0464884326598529	Down
Tspan8	-1.17136	0.00853395638001132	Down
Tle4	-1.17298	0.034248713320787	Down
Sec24a	-1.17303	0.025484497596554	Down
Ankrd13a	-1.17304	0.00916064137843499	Down
Nacc1	-1.17352	0.0231608943530764	Down
Ap1ar	-1.17376	0.0134600191166606	Down
Smad4	-1.17542	0.0144368366562122	Down
Rab8a	-1.17687	0.00976267338770553	Down
Atf1	-1.17701	0.045861839873419	Down
Acsl5	-1.17791	0.0245832917185152	Down
Scyl2	-1.17881	0.0359258964572788	Down
Cnot9	-1.18049	0.0209051804577087	Down
Coro1c	-1.18165	0.00752351487499126	Down
Chuk	-1.18223	0.0120481726488591	Down
Arhgef5	-1.18628	0.0175685831304959	Down
Prr15l	-1.18751	0.0156214880963437	Down
Adipor2	-1.18817	0.00537930019360672	Down
Slc25a45	-1.19197	0.0463671186911149	Down
Cttn	-1.19305	0.00399189404441618	Down
AA986860	-1.19667	0.0224865772950257	Down
Stap2	-1.19672	0.0201567685911577	Down
Dnmbp	-1.1985	0.0252094429300503	Down
Actb	-1.19851	0.00432581078698398	Down
Tmem98	-1.19859	0.0364292543423012	Down
Tmem183a	-1.19891	0.00638563847679379	Down
Zc3h18	-1.20281	0.0193126734690332	Down
Tbca	-1.20322	0.030467876300516	Down
Ccdc6	-1.20527	0.0249019190404246	Down
Agfg1	-1.2062	0.019956105396597	Down
Zfyve21	-1.20645	0.0334706130007794	Down
Stx7	-1.21047	0.00712196382816936	Down
Rac1	-1.21078	0.0121146089890197	Down
Rab1a	-1.21118	0.0167345798526256	Down
Wbp2	-1.21313	0.0151790349270807	Down
Arhgap26	-1.21343	0.0410323354292439	Down
Skil	-1.21439	0.0392555296536478	Down
Lpcat3	-1.21466	0.0231293962310941	Down
Sec13	-1.21674	0.0356170628044425	Down
Arcn1	-1.21767	0.0194216099357868	Down
Gipc2	-1.21853	0.0380812058788311	Down
Ahcy	-1.22001	0.0490474995247379	Down
Abhd2	-1.22159	0.0116553304141416	Down
Spin1	-1.22187	0.0125221476221866	Down
Atp1a1	-1.22235	0.00415778527398144	Down
Arfgap3	-1.22359	0.00890393450056161	Down
Zfand6	-1.22376	0.0159365172877022	Down
Gpd2	-1.22531	0.0137502604839697	Down
Ppp4r1	-1.22573	0.0206989697395378	Down
Mcfd2	-1.22763	0.0162212707353699	Down
Ankib1	-1.22864	0.0367205545365508	Down
Wasf2	-1.2299	0.00632323075660072	Down
Klf3	-1.2326	0.0149447333949005	Down
Socs4	-1.23352	0.00944190292225477	Down
Abhd17c	-1.23652	0.0138205153044682	Down
Micu2	-1.2387	0.00965552700144474	Down
Ppm1h	-1.23938	0.0189018141245702	Down
Ppip5k2	-1.24211	0.0201404896283488	Down
Lipe	-1.24394	0.0162116853717473	Down
Naprt	-1.24451	0.0169821308511648	Down
Rc3h1	-1.24518	0.0145065378978773	Down
Axin2	-1.24657	0.0394199377719104	Down
Gak	-1.24834	0.0131917122358807	Down
Sipa1l3	-1.25016	0.0101474399794038	Down
Slc35f5	-1.25098	0.0306677219396941	Down
Agap1	-1.25606	0.016308600822857	Down
Hadh	-1.25705	0.0224667524133549	Down
Tulp4	-1.25797	0.0406285170386905	Down
Wdtc1	-1.25827	0.00874092598801529	Down
Heatr5a	-1.25894	0.0186112059598967	Down
Cpeb2	-1.25899	0.0185974378813517	Down
Rhou	-1.25926	0.0182837751069288	Down
Mxi1	-1.25993	0.038334050468185	Down
Litaf	-1.26035	0.0179785641550805	Down
Ets2	-1.26112	0.0140666195483516	Down
Camk1d	-1.26119	0.0413136824049061	Down
Yipf1	-1.26412	0.0449431669646941	Down
H2bc4	-1.2653	0.00883426672828555	Down
Bri3bp	-1.26549	0.0495174221633744	Down
Kras	-1.26638	0.0218765411765459	Down
Iah1	-1.26729	0.0409338425744804	Down
Gls	-1.26901	0.00500370826434277	Down
Tollip	-1.27029	0.0046560317896144	Down
Elf1	-1.27115	0.0353918827597536	Down
Vps35	-1.27296	0.023489086811687	Down
Selenoi	-1.2733	0.0396004403607342	Down
Fahd1	-1.27418	0.0257795807511356	Down
Zfp36l2	-1.27438	0.0183801731199555	Down
Aph1a	-1.27617	0.0166810414751384	Down
Dlst	-1.27765	0.00387259375655885	Down
Arrb1	-1.27986	0.0106151006698805	Down
Fam20b	-1.28061	0.00795973907264835	Down
Gnb1	-1.28369	0.00684390480889207	Down
Marchf5	-1.28481	0.0155979323228923	Down
Phactr4	-1.28636	0.00885293084117897	Down
Eif6	-1.28651	0.0318973494753642	Down
Vps4b	-1.28682	0.025725311824031	Down
Zdhhc7	-1.28736	0.016770214564831	Down
Btg2	-1.28822	0.0108394409330383	Down
Uap1l1	-1.29093	0.0377353286777716	Down
Fgd4	-1.2911	0.0301690958843383	Down
Ube2a	-1.29572	0.0494813204931803	Down
Cdc42ep2	-1.29581	0.0394669469049243	Down
Dnajc14	-1.29635	0.0159130717917765	Down
Rxra	-1.29686	0.0106706972376196	Down
Mavs	-1.29815	0.0156822505141784	Down
Abcb7	-1.30172	0.0409076394749018	Down
Dstn	-1.3036	0.00132755750414035	Down
Insig2	-1.30377	0.032541650799083	Down
Lrrc75a	-1.30503	0.0458086547332011	Down
Prkcd	-1.30956	0.0182409281105927	Down
Spint1	-1.30976	0.0428239121277881	Down
Kif21b	-1.31011	0.0480288111002383	Down
Cmpk1	-1.31061	0.00641753841587082	Down
Arhgap5	-1.31073	0.0283761515995948	Down
Slc4a4	-1.31149	0.0399317851954583	Down
Snx9	-1.31151	0.00717022986213567	Down
Gramd1b	-1.31532	0.0359447703676302	Down
Vamp3	-1.31625	0.00705554179551553	Down
Max	-1.31654	0.0151107361295924	Down
Sucla2	-1.31729	0.0224693796220297	Down
Ubxn2a	-1.31798	0.00783482632225316	Down
Usp38	-1.31887	0.0364617680457231	Down
Marchf6	-1.31995	0.0355840149245543	Down
Edc3	-1.32083	0.0474769458158639	Down
Dnajb1	-1.32344	0.0185229128122434	Down
Mpp5	-1.32355	0.0134492255970106	Down
Kctd5	-1.32361	0.0200940843397449	Down
Abcd1	-1.32477	0.0187665765427943	Down
Cds1	-1.32608	0.0147993826902198	Down
Ormdl3	-1.32752	0.0136967938977958	Down
Magi3	-1.32761	0.028567384150051	Down
Jak2	-1.32802	0.00554084526734557	Down
Ppp2r5c	-1.32864	0.0117294459474416	Down
Nostrin	-1.32868	0.0491451205928803	Down
Lin7c	-1.3293	0.00552235043846353	Down
Mall	-1.32938	0.036638733630179	Down
Mex3c	-1.32941	0.012242205067615	Down
Trappc4	-1.33097	0.0386228893035531	Down
Vdac2	-1.33353	0.00482786302545163	Down
Mtarc2	-1.33446	0.00786694360708578	Down
Chn2	-1.33468	0.0458816560374535	Down
Pdlim1	-1.33654	0.0476612396748124	Down
Ccdc186	-1.33682	0.0411830581894897	Down
Twf1	-1.33734	0.0119189306856633	Down
Ap3s1	-1.33737	0.00594823652450116	Down
Dqx1	-1.33788	0.0300798452028801	Down
Fam214b	-1.33824	0.0113364658890579	Down
Oat	-1.34044	0.00834338369445633	Down
Smim31	-1.34248	0.0265519663455899	Down
Scp2	-1.34384	0.0142924358657442	Down
Mcur1	-1.3449	0.0261895555531188	Down
Akap7	-1.34579	0.0112145952191789	Down
Pxk	-1.34817	0.012620246281938	Down
Sgpl1	-1.34842	0.00386284335797789	Down
Nr1h3	-1.3496	0.0351633828223181	Down
Sfxn1	-1.35277	0.00991967688228438	Down
Ralgps2	-1.35316	0.0147601381128329	Down
Pdcd6	-1.35377	0.0176111636534777	Down
Apol9b	-1.35466	0.0372684701896981	Down
Ccdc32	-1.35614	0.0242839241906876	Down
Cobl	-1.3568	0.0148754253924327	Down
Rab11fip1	-1.36191	0.00755991880043318	Down
Snx25	-1.36304	0.0497192084991227	Down
Tnip1	-1.36604	0.0077934430078905	Down
Copb2	-1.3671	0.0118071623244269	Down
Acox1	-1.36757	0.00436168203930566	Down
Samd8	-1.36765	0.0126505733080141	Down
Vav2	-1.36897	0.0115714148023991	Down
Ctnnd1	-1.37058	0.00272865130207868	Down
Bcar1	-1.37159	0.00586056961643308	Down
Nlrc4	-1.37259	0.0337394605917986	Down
Bak1	-1.37373	0.0136389334394649	Down
Fnbp1l	-1.38092	0.00623662713725126	Down
Mtmr4	-1.38366	0.0108744861611998	Down
Dock5	-1.3856	0.00666624072934589	Down
Nat2	-1.38679	0.0484773060924441	Down
Glud1	-1.38786	0.00167649129919406	Down
Mob1a	-1.39137	0.0284957865423416	Down
Sco1	-1.39138	0.0306850017004637	Down
Slc25a24	-1.39214	0.0343404061397383	Down
Gnai3	-1.39373	0.0129537787283078	Down
Hectd3	-1.39508	0.0124849386665113	Down
Abr	-1.39677	0.00550511198895413	Down
Rcbtb1	-1.39896	0.0129058861904344	Down
Ap2b1	-1.39898	0.00151968974309063	Down
Cmtm4	-1.40152	0.00929128899096727	Down
Mdh1	-1.4017	0.0137344249319673	Down
Rab35	-1.40264	0.0273113106789976	Down
Baiap2l1	-1.40558	0.0102366369360276	Down
Cyb5b	-1.40592	0.0112063128716509	Down
Erbin	-1.4071	0.00160807089598833	Down
Gata5	-1.40743	0.0172879816821701	Down
Dhrs11	-1.40803	0.0317145387372455	Down
Casp9	-1.40886	0.0407744953842356	Down
Fbxl5	-1.40909	0.00817471400381885	Down
Irak4	-1.41011	0.0175634651501829	Down
Mkrn1	-1.41094	0.00938332768822261	Down
Tnik	-1.41099	0.0393678513142564	Down
Cacul1	-1.41306	0.00972383641931561	Down
Aco1	-1.41431	0.00620407718846511	Down
Rnf115	-1.41517	0.0287058915121738	Down
Dync1li1	-1.41522	0.0317289343724358	Down
Rnf125	-1.41537	0.0290022950206671	Down
Tmcc1	-1.41871	0.0114109202161763	Down
Prlr	-1.41897	0.00416780121560858	Down
Tjp1	-1.42017	0.00670512092535748	Down
Zfyve1	-1.4202	0.0174248743000939	Down
Lonp2	-1.42097	0.0470047833487284	Down
Lta4h	-1.4212	0.00352815540130654	Down
Irf6	-1.425	0.0165451507920886	Down
Ypel2	-1.4257	0.0258147445649125	Down
Apoa1	-1.42614	0.000993670724629676	Down
Klf6	-1.42897	0.00190669584270916	Down
Specc1l	-1.42949	0.00371973868144727	Down
Ptbp3	-1.4311	0.00278230927060693	Down
Enpep	-1.43227	0.0259535478751568	Down
Arhgef11	-1.433	0.0480944018736342	Down
Mafb	-1.43326	0.0445030858818121	Down
Maf	-1.43466	0.00689754766580997	Down
Nectin3	-1.43735	0.0156334144389505	Down
Mapk6	-1.43756	0.0039100579935442	Down
Plekha1	-1.44049	0.00700396115787175	Down
Plekhf2	-1.44085	0.0365542235640874	Down
Tbk1	-1.44095	0.0173608057812393	Down
Gsdmd	-1.44104	0.00276463478523792	Down
Mgst1	-1.44113	0.0198139305297071	Down
Etfdh	-1.44144	0.0222627038703268	Down
Map3k2	-1.44167	0.0113604043616763	Down
Isoc1	-1.4422	0.00940209254949083	Down
Ada	-1.44331	0.0450504860364353	Down
Prr13	-1.44347	0.0037496024571429	Down
Tob2	-1.44386	0.0122585116891968	Down
Fam117b	-1.44448	0.018339205616892	Down
Coq4	-1.44876	0.042009365584996	Down
C77080	-1.45216	0.0162251718242962	Down
Marchf8	-1.45709	0.00103162172357518	Down
Bloc1s6	-1.45728	0.0237015252708996	Down
Slc18b1	-1.45939	0.0233905477812113	Down
Serpinb1a	-1.4617	0.047753433670341	Down
Necap1	-1.46176	0.0187034129864023	Down
Papss1	-1.46556	0.00214390930978928	Down
Parp12	-1.46635	0.00764905711472387	Down
Nudt5	-1.46755	0.0130428658482077	Down
Ldha	-1.4703	0.0148031621537307	Down
Prelid1	-1.47063	0.00349208257489182	Down
E2f2	-1.47117	0.0317831844085827	Down
Ap2a2	-1.47146	0.0117460966112991	Down
Dusp16	-1.47346	0.0162215537410692	Down
Sh3gl2	-1.47464	0.0372257813159106	Down
Pde9a	-1.47471	0.0169998244241487	Down
Krt8	-1.47474	0.00751835375871665	Down
Zfp36	-1.47515	0.00204065782156354	Down
Rb1	-1.47593	0.0056985077263571	Down
Slc31a1	-1.4783	0.00729201250961208	Down
Plscr1	-1.47841	0.0459616615405627	Down
Tprn	-1.47937	0.0193919017032424	Down
Ephx2	-1.48062	0.0209730003043783	Down
Hsd17b6	-1.48151	0.0403685764950434	Down
Plekhb2	-1.48166	0.00304809211900665	Down
Dusp6	-1.483	0.0250990038283277	Down
Crip1	-1.48431	0.0280773746328098	Down
Midn	-1.48642	0.00163602232810828	Down
Pak1	-1.48781	0.0105682995944971	Down
Myh14	-1.49061	0.00961439695732592	Down
Sema4g	-1.49096	0.0100183147015017	Down
Slbp	-1.49106	0.0366147850192859	Down
Emp1	-1.49224	0.00471367483485324	Down
Odc1	-1.49235	0.0123777350190039	Down
BC005537	-1.49297	0.00495979953682486	Down
Gtf2b	-1.49384	0.0140583683061654	Down
Ifngr2	-1.4948	0.0179082532872623	Down
Trib1	-1.49698	0.00895457901366332	Down
Osgin1	-1.49749	0.0163201606222257	Down
Gna13	-1.49847	0.00485981330035551	Down
Cs	-1.49985	0.000745597448517446	Down
Lpgat1	-1.5014	0.0110626261105447	Down
Norad	-1.50192	0.00527683784919527	Down
Tmcc3	-1.50802	0.002954710188446	Down
S100a10	-1.50807	0.009408829251105	Down
Chmp1b	-1.50944	0.0116019050586648	Down
Vamp7	-1.50996	0.0112529195070855	Down
Sh3d19	-1.51201	0.00132300916617456	Down
Btg1	-1.5131	0.00121298749877662	Down
Cdc42se2	-1.51342	0.01151986792281	Down
Arhgef16	-1.51573	0.00507806300904616	Down
Tmem243	-1.51602	0.0181604342625728	Down
Ptpn3	-1.51907	0.0107987484416375	Down
Myo1d	-1.51996	0.00671089997870356	Down
Dtx3l	-1.52032	0.00592042772538558	Down
Tm4sf4	-1.52083	0.0363397175610673	Down
Fam53b	-1.52285	0.0105075684647606	Down
Gpt	-1.52387	0.00447235784524845	Down
Tkfc	-1.52425	0.0444922427797188	Down
Arf6	-1.52498	0.00103372315534185	Down
Pdcd6ip	-1.52541	0.00461654180822795	Down
Tnfsf10	-1.52606	0.0226626919017067	Down
Kbtbd11	-1.52636	0.0151133014564665	Down
Dgat1	-1.52695	0.00199622313233744	Down
Uhmk1	-1.52825	0.00104209348964831	Down
Cep85	-1.52856	0.0118869369507109	Down
Zc3h12d	-1.53038	0.0412139553017	Down
Mtmr11	-1.54112	0.0246840363978921	Down
Nfil3	-1.5417	0.0319961587895427	Down
Aldob	-1.54771	0.0392961592308175	Down
Ubqln1	-1.54774	0.00147333468411469	Down
Lpin3	-1.54985	0.0157610050481756	Down
Tcn2	-1.55003	0.0156720729524046	Down
Tuft1	-1.55741	0.0104434493772476	Down
Rnf19b	-1.55745	0.00877414830532202	Down
Tspan13	-1.56239	0.00220270197486905	Down
Fbxw11	-1.56535	0.0156410938038145	Down
Nol4l	-1.56885	0.00888544839188029	Down
Aldh9a1	-1.56915	0.0109635844388733	Down
Apoa4	-1.56929	0.0240014706031927	Down
Mkrn2os	-1.56936	0.0163223115406555	Down
Oip5os1	-1.56992	0.00761258862783427	Down
Tradd	-1.57084	0.00613286106442673	Down
Mpp1	-1.57124	0.00515392228194781	Down
Mcu	-1.57161	0.0181130982425433	Down
Synpo	-1.57424	0.0018773086710749	Down
Tut7	-1.57497	0.00767129659020858	Down
Alas1	-1.5754	0.00582394528488747	Down
Lurap1l	-1.57603	0.0104581089523687	Down
Sprr2a3	-1.57738	0.00613125479119832	Down
Ppp4r3b	-1.57772	0.0337795107438455	Down
Slain2	-1.5786	0.00602801433904513	Down
Ankrd46	-1.58409	0.00543625844684587	Down
Ptgr2	-1.58486	0.00577907822948571	Down
Eif2ak1	-1.58508	0.010561468874206	Down
C1qtnf12	-1.58642	0.0167124597384698	Down
Epb41l4b	-1.58651	0.00343804150363665	Down
Pipox	-1.58802	0.0495989223285462	Down
Plin3	-1.58856	0.00334781041870832	Down
Tdrd7	-1.58903	0.00310867862968241	Down
Pard6b	-1.58956	0.0136225085620067	Down
Myo1a	-1.59031	0.0229465130986333	Down
Dhfr	-1.59133	0.0414687636941476	Down
Leng9	-1.59138	0.0264742912924496	Down
E2f3	-1.59209	0.00815791831304841	Down
Ccdc71l	-1.59233	0.0090262407046237	Down
Txnrd1	-1.59448	0.0136347842372387	Down
Adtrp	-1.59639	0.0313167098937292	Down
Rab5a	-1.59667	0.0133957561349111	Down
Agpat2	-1.59673	0.000927352091062713	Down
Itpk1	-1.59713	0.00349290921815926	Down
Med13	-1.59754	0.0016019045720622	Down
Tox4	-1.59869	0.0107554432783664	Down
Reep6	-1.59958	0.0197357187707567	Down
Gda	-1.60039	0.0211637578729447	Down
Noct	-1.60067	0.0266710667252142	Down
Fam13b	-1.60154	0.0229901981098601	Down
Slc25a15	-1.60303	0.0157521157223536	Down
Azin1	-1.60482	0.00157882952379683	Down
Plagl2	-1.60719	0.0120736253479427	Down
Relb	-1.60775	0.00192174302236929	Down
Anxa2	-1.61428	0.00174061866252505	Down
Plek2	-1.61483	0.0344696209298788	Down
Lgals3	-1.61714	0.0114111261810108	Down
Zfp747	-1.61838	0.0355619956102878	Down
Chmp2b	-1.61935	0.00158088669551073	Down
Adap1	-1.62253	0.00757113537545395	Down
LOC118567621	-1.62393	0.0109634302746691	Down
Reps2	-1.62537	0.0269755061167668	Down
Fam98c	-1.62713	0.02713679986669	Down
Ehhadh	-1.63281	0.0361424518777264	Down
Aamdc	-1.63464	0.00737073123165208	Down
Ppfia3	-1.63538	0.0346717897330913	Down
Glrx	-1.63849	0.00582043056001565	Down
Atp10b	-1.64271	0.036543585743006	Down
Hmgb3	-1.64681	0.0131457955908505	Down
Dcaf7	-1.64987	0.00258660091740739	Down
Anks4b	-1.65533	0.0298214488491711	Down
Bspry	-1.65711	0.00400514378099069	Down
Prdm4	-1.65733	0.0371724737182224	Down
Tbc1d24	-1.66082	0.0310905018231236	Down
Serpinb6a	-1.6623	0.00352969738408539	Down
Chmp5	-1.66359	0.0084427759343658	Down
Ccl25	-1.66545	0.0282994563904125	Down
Zdhhc5	-1.66664	0.0048172514270235	Down
Sh3bgrl2	-1.67218	0.0142556191817384	Down
Coro2a	-1.6742	0.0180099014366057	Down
Degs2	-1.67675	0.0376313118178133	Down
Snap29	-1.67801	0.00830449983151511	Down
Plpp2	-1.67819	0.00455962220971706	Down
Myo5b	-1.6815	0.0130016068158003	Down
Cyp4v3	-1.68235	0.00582331749512811	Down
Prdm1	-1.68511	0.0282248461103708	Down
Nrarp	-1.68724	0.0304431015267405	Down
Maob	-1.68753	0.000818968948541905	Down
Plcb3	-1.69244	0.00109916483314101	Down
H2-Q2	-1.69273	0.0275403781793467	Down
Aldh3a2	-1.69665	0.000437372593006373	Down
Cops3	-1.69942	0.0361186245181973	Down
Fabp2	-1.69944	0.0260129986975485	Down
Trim14	-1.70314	0.00802204476551203	Down
Tff3	-1.70699	0.0241155286019782	Down
Atl2	-1.70701	0.00636875459613585	Down
Pstpip2	-1.70781	0.02555455843699	Down
Slc25a22	-1.71358	0.000119405382484675	Down
Pklr	-1.71371	0.0160890401055599	Down
H1f2	-1.71768	0.00918183840399698	Down
Sfn	-1.71831	0.00157978905457469	Down
Creb3l2	-1.71896	0.0379282662541808	Down
Jpt2	-1.72	0.00509682606973136	Down
Aqp3	-1.72044	0.029923767935864	Down
Pip5k1b	-1.72331	0.0142660965410122	Down
Strn	-1.72357	0.00249047861353253	Down
Tmem120a	-1.72576	0.00393676131261144	Down
Apol9a	-1.72609	0.00782841751448075	Down
Bcar3	-1.72684	0.00879170551435253	Down
Ncoa4	-1.7276	0.0290017766787734	Down
Tmem86b	-1.72812	0.00948951574244354	Down
Xpnpep1	-1.72815	0.00504716259888744	Down
Bet1	-1.73429	0.000605864623686771	Down
Irak2	-1.73592	0.000846389294094434	Down
Slc30a4	-1.73711	0.0068108172045012	Down
Clic5	-1.7373	0.0200650563444691	Down
Ppp1r9b	-1.73768	0.00557620456042803	Down
Ms4a8a	-1.74465	0.005982284648832	Down
Reg3a	-1.74504	0.0421941462345559	Down
Chp2	-1.74594	0.0129785333228161	Down
Mtf1	-1.74672	0.00518299752655843	Down
Casp7	-1.74748	0.0101424843536413	Down
Gng12	-1.7524	0.000717135161553519	Down
Me2	-1.7538	0.00118442729055418	Down
Aqp1	-1.75391	0.00189012776628048	Down
Lap3	-1.75764	0.00746620851429317	Down
Pmp22	-1.75798	0.00175210831502416	Down
Reg3g	-1.76041	0.0359282076558484	Down
Spink1	-1.76674	0.0250638000649702	Down
Il22ra1	-1.77104	0.0417838824665345	Down
Abat	-1.77206	0.014678302355351	Down
Vipr1	-1.77699	0.0258776349916632	Down
Cers6	-1.7787	0.0168564398798931	Down
Frat1	-1.78108	0.0413468872876056	Down
Cdkn2b	-1.78279	0.0018679294484773	Down
Sox13	-1.7842	0.000925029455584472	Down
Slc35f2	-1.79005	0.0358951608691842	Down
Prkg2	-1.79244	0.0316458592451385	Down
Luzp1	-1.79399	0.00030032308131215	Down
Slc27a4	-1.79622	0.00385279405117479	Down
Vil1	-1.79966	0.0186394536655776	Down
Akr1b7	-1.79977	0.0385451543399229	Down
Tmem41a	-1.80229	0.0084940011763172	Down
Tgfa	-1.8029	0.00948122603749604	Down
Mgam	-1.80291	0.0130163652851716	Down
Atg4d	-1.80433	0.00602991472136596	Down
Crot	-1.80706	0.00159424812194748	Down
Ccl6	-1.81044	0.00692980223759096	Down
Prr15	-1.81046	0.00506112149431751	Down
Grb7	-1.81325	0.000802354544223328	Down
Gsdme	-1.81414	0.0121381903260636	Down
Nudt4	-1.8179	0.00056309574256849	Down
Tom1l1	-1.82121	0.0145141418448997	Down
Patj	-1.8237	0.00060655867792951	Down
Gimd1	-1.82739	0.0227916231049037	Down
Rasgef1b	-1.8281	0.010372038133363	Down
Slc5a1	-1.82817	0.0163415813402899	Down
Apoc3	-1.82959	0.0114925538320587	Down
Ttc39c	-1.832	0.0229089088206447	Down
Net1	-1.83359	0.000192019073983782	Down
Rorc	-1.83443	0.00476103309308323	Down
Sec23a	-1.83702	0.000210593724551765	Down
Yes1	-1.83891	0.00513816319487237	Down
Abcg5	-1.83941	0.0383378866960468	Down
Ush1c	-1.84346	0.029348711892004	Down
Pdcd10	-1.84512	0.0024069176637564	Down
Car4	-1.84652	0.00491282718235776	Down
Efr3b	-1.84654	0.00549658769263151	Down
Frk	-1.84665	0.0129641230454501	Down
Usp12	-1.84785	0.00471690163272679	Down
Dgkq	-1.84865	0.0275054152272136	Down
Bag4	-1.85101	0.00304199185022835	Down
Frat2	-1.85112	0.0212321579472287	Down
Lrrc59	-1.85191	0.00165218196355606	Down
Ndrg3	-1.85345	0.00146408111085973	Down
Rhod	-1.85839	0.00144883873515525	Down
Lypla1	-1.86196	0.000282210162559504	Down
Optn	-1.86235	0.000236646335486561	Down
Nek6	-1.86516	0.00135521953951099	Down
Mep1b	-1.86871	0.0293180651559476	Down
Defa39	-1.87101	0.0339398468567376	Down
Car13	-1.87306	0.00717230079194606	Down
Ttc22	-1.87633	0.00847837380379339	Down
Rnd2	-1.87774	0.0036642346855022	Down
Slc16a10	-1.8828	0.00323567155820987	Down
Septin5	-1.88611	0.00560479905774166	Down
Mapk1ip1l	-1.88796	0.000284989654539674	Down
Slc39a4	-1.89423	0.00362799025744433	Down
Wipf3	-1.8962	0.00533470789038134	Down
Clec2h	-1.9029	0.0166317248191574	Down
Fmo4	-1.90359	0.0187003600998883	Down
Gpa33	-1.90514	0.00986851738209341	Down
Ces2a	-1.90659	0.0365420438645613	Down
Slc46a3	-1.90799	0.0151492500441642	Down
Tfg	-1.91449	0.0022536613380225	Down
Dsp	-1.91686	8.38463428681601e-05	Down
LOC118568032	-1.91994	0.0154844775290311	Down
Gch1	-1.92165	0.0246784318201547	Down
Prrx1	-1.92281	0.0113211533755071	Down
Guca2b	-1.9232	0.0107957969831178	Down
Pex7	-1.92664	0.0176668935681795	Down
Pi4k2b	-1.92846	0.000790201881416182	Down
Myzap	-1.92855	0.00764298990057408	Down
Lysmd3	-1.92866	0.00182612075671643	Down
Galm	-1.9329	0.00210895068349428	Down
Ndfip2	-1.93351	0.00188912267052402	Down
Socs3	-1.93377	0.0244693092101477	Down
Cidec	-1.93788	0.0143879404219527	Down
Tmem170	-1.93949	0.00089248267719449	Down
Dok4	-1.93972	0.00518338645823398	Down
Cdkn1a	-1.94234	9.40571753471514e-06	Down
Naip2	-1.94546	0.0202171664679617	Down
Ifrd1	-1.94717	7.72213443761353e-05	Down
Gramd1c	-1.95301	0.00374271146528065	Down
Cldn15	-1.9565	0.00954152513428523	Down
Mlx	-1.95842	0.0114175542160748	Down
Il15	-1.95845	0.0417885440978434	Down
Ascc3	-1.95926	0.0349955787499273	Down
Stard4	-1.96157	0.00135972001622386	Down
Ugcg	-1.97061	0.000378049680596891	Down
Pm20d1	-1.97098	0.0461218653745698	Down
Pxdc1	-1.97211	0.00161606744558716	Down
Cnnm4	-1.97322	0.0113353040708464	Down
Ipmk	-1.97681	0.00395402111128644	Down
Mme	-1.97764	0.00714520176715999	Down
Arpin	-1.97832	0.00757282838337065	Down
Tmem45b	-1.98029	0.000670459446459716	Down
H2-Q1	-1.98261	0.0317097247869508	Down
Mttp	-1.98508	0.00856633977805662	Down
Mob1b	-1.98674	0.00210998274597509	Down
Pcyt1a	-1.9872	0.000106986706473557	Down
Ace	-1.99002	0.000807231235711585	Down
Sec14l2	-1.99138	0.0155037114383392	Down
COX2	-1.99202	0.00942787867325761	Down
Nr3c2	-1.994	0.0097997822973188	Down
Myo15b	-1.99899	0.00281073460500824	Down
Tmem238l	-2.00062	0.00247817395508176	Down
Pold4	-2.00212	0.0397026612339436	Down
Errfi1	-2.00373	0.00160562393245226	Down
Ces2c	-2.00414	0.0123734093700369	Down
Rap2c	-2.0071	0.000700646089139636	Down
Dgat2	-2.00714	0.00125987234299525	Down
Fam118a	-2.00718	0.000391395805154151	Down
Rnasel	-2.00889	0.00192691657931706	Down
Smim24	-2.012	0.00247018281382196	Down
Cdhr5	-2.0151	0.00548809292270088	Down
Mgat4a	-2.01917	0.000247887192248381	Down
Ifit1bl2	-2.02116	0.00614147019188893	Down
Gpr160	-2.0217	0.00732969079745497	Down
Gnpda1	-2.02174	0.000114031043578703	Down
Iqgap2	-2.02548	5.89399345656621e-06	Down
Gpsm2	-2.02565	0.00280758813656397	Down
Abcg8	-2.02994	0.0198393271236649	Down
Sectm1b	-2.03511	0.000464421659626556	Down
Eps8	-2.03582	0.000947906643436748	Down
Tesk2	-2.03866	0.00603629895634747	Down
Tm4sf5	-2.04046	0.00947974005305306	Down
Anxa4	-2.04195	0.000149522980559336	Down
Ccng2	-2.04406	0.000392280963734858	Down
Pdzd3	-2.04593	0.0256199610960665	Down
Cyp4f14	-2.04916	0.0114931517303635	Down
Slc30a2	-2.05091	0.0159704502608788	Down
Fam78a	-2.05318	0.00788728602112262	Down
Tymp	-2.05619	0.0446233750663516	Down
Dio1	-2.0584	0.0212961186016365	Down
Srxn1	-2.06448	0.00139997450512548	Down
Lpar5	-2.06685	0.00116599716444636	Down
Dnase1	-2.06703	0.0111461116427702	Down
Olfm4	-2.06728	0.00545197080071407	Down
Fam110c	-2.06995	0.0142304223891004	Down
Lrrc1	-2.07247	0.000108953708832638	Down
Tmem54	-2.0732	0.0011008058705735	Down
Rragd	-2.07731	0.00373866977327824	Down
Pptc7	-2.07867	0.00360105319829343	Down
Themis3	-2.08091	0.014931035771808	Down
Tmem236	-2.0923	0.0280186563660761	Down
ATP8	-2.09676	0.0190197665769047	Down
Bhlhe40	-2.0992	0.00031420198215038	Down
Tm6sf2	-2.10775	0.0059218197596217	Down
Spns2	-2.10804	0.00155184706770844	Down
Dab1	-2.11046	0.00473701404725667	Down
Slc9a3r1	-2.11093	0.000681706993184177	Down
Garem1	-2.11239	0.0220659665560815	Down
Cyp3a13	-2.11441	0.00119877879842921	Down
Uprt	-2.11489	0.000965721805878951	Down
Epb41l3	-2.11492	0.0014063786257302	Down
Frmd8	-2.12093	0.00199294887711227	Down
Ereg	-2.12513	0.0484251969065369	Down
Asah2	-2.12796	0.000754624417188341	Down
Car3	-2.12798	0.0194510618021741	Down
Gal3st2	-2.13326	0.0153516768701633	Down
Slc6a8	-2.14106	0.000343219080693443	Down
Ppp2r5d	-2.14302	1.94991355037675e-05	Down
Reg3b	-2.14422	0.0108602643624712	Down
Gdpd1	-2.14943	0.000172024611055258	Down
Rab20	-2.15084	0.0198706257485225	Down
Usp37	-2.16006	0.000199206737224359	Down
Macir	-2.16161	0.000879118914009404	Down
Slc47a1	-2.16651	0.0367171465949604	Down
Soat2	-2.16931	0.00235275792210662	Down
Aoc1	-2.17471	0.0154122468688198	Down
Csnk2b	-2.17961	0.00541717268206129	Down
Mtm1	-2.1816	0.00470727324604835	Down
Anpep	-2.1856	6.10189594992112e-06	Down
Epcam	-2.18744	9.92220437779226e-05	Down
Cdh17	-2.19087	0.0022713759557893	Down
Nuak2	-2.19688	0.000536026136150895	Down
Chdh	-2.2024	0.000513176121984843	Down
Ms4a10	-2.20501	0.00570560468569137	Down
Ovol1	-2.20509	0.00881985853572242	Down
Cndp2	-2.20804	0.000438291582284662	Down
Dpep1	-2.20945	0.000655493509929835	Down
Ugt2a3	-2.21368	0.0187967581557926	Down
Pmaip1	-2.21858	0.00191375507149057	Down
Mxd1	-2.23235	9.0140499763517e-05	Down
Satb2	-2.23477	0.0375727564790944	Down
Pepd	-2.24018	0.000845130439998558	Down
Smad7	-2.24126	0.0266139586271256	Down
Krt20	-2.24168	0.00180306206424522	Down
Cdhr2	-2.24431	0.00384034141062603	Down
Pls1	-2.24501	0.000870449913697688	Down
Slc4a5	-2.2507	0.0350934914873556	Down
Tmem86a	-2.25071	4.37406864792378e-05	Down
Osbpl6	-2.25903	0.000625765092262347	Down
Sord	-2.26033	3.9478091895902e-05	Down
Tmc5	-2.26081	0.00131885972511509	Down
Foxj3	-2.26301	0.00016018145820307	Down
Rybp	-2.26681	0.00716559051266135	Down
Pgm3	-2.26745	0.0270520808583186	Down
Apaf1	-2.26943	0.000109395618698667	Down
Creb3l3	-2.28377	0.0039017991003396	Down
Acot4	-2.28433	0.0475794073535738	Down
Ptk6	-2.28442	0.0413951857681238	Down
Fam83g	-2.28514	0.00469408459065377	Down
Ace2	-2.28903	0.00227249922278383	Down
Cfd	-2.29478	0.0301569325302884	Down
Naaladl1	-2.29607	0.0125895800112775	Down
Plb1	-2.29784	0.0491766421646044	Down
Slc51b	-2.29956	0.0192850288834611	Down
Slc43a2	-2.30017	7.70438335156483e-05	Down
Fos	-2.30369	0.000461724431945557	Down
Sgk1	-2.31664	0.000128996426837868	Down
Apol10a	-2.31807	0.00301594026128334	Down
Smpdl3b	-2.32219	0.00915441369261878	Down
Sgk2	-2.32358	0.00451719637718064	Down
Crybg2	-2.32441	0.0145920627097368	Down
Carmil1	-2.33044	0.000334725133044058	Down
Clrn3	-2.33693	0.00941616830373201	Down
Rfk	-2.33982	5.19223971518965e-06	Down
Apob	-2.34183	0.00109578424046439	Down
Gzma	-2.34247	0.0244873004698951	Down
Spcs1	-2.34396	0.00317009520274328	Down
Pax8	-2.34533	0.0378707756642124	Down
Slc15a1	-2.36213	0.00236330367305321	Down
Fbxo34	-2.36382	0.00644520801734177	Down
Igsf23	-2.37359	0.000343379866096001	Down
Entpd8	-2.38871	0.034581323398461	Down
Muc2	-2.39008	0.00412679592873572	Down
Heph	-2.3922	0.00684445622721374	Down
Slc7a15	-2.3958	0.0108517323060324	Down
Apol7a	-2.40401	6.57163573251461e-05	Down
Cd7	-2.40424	0.0364347189616565	Down
Btnl7-ps	-2.41099	0.00115078983780023	Down
Bst1	-2.41645	0.00474697414979341	Down
Treh	-2.41773	0.00557859624243098	Down
Gp1bb	-2.4412	0.00483578707552238	Down
Tmem150b	-2.4474	0.00416511603232428	Down
Tmem263	-2.44852	0.0140701799445457	Down
Enpp3	-2.45516	0.00243076295426654	Down
Pdzk1	-2.45637	0.00943169103546546	Down
Sowahb	-2.46357	0.0010058872388392	Down
Eci3	-2.46404	0.00887069218695992	Down
Mogat2	-2.47531	0.00292097627193637	Down
COX3	-2.47657	0.000795491814653246	Down
Reg4	-2.47729	0.0148764035387751	Down
Dpp4	-2.48758	0.000468034901435688	Down
Gas2l3	-2.49222	0.017010302053169	Down
Cldn7	-2.49525	0.000976946826944649	Down
Clca4b	-2.49589	0.00201025092299864	Down
Npl	-2.50393	0.026266910459155	Down
Fam83b	-2.5079	0.000351009444087978	Down
Tmem252	-2.51149	0.00424455261276212	Down
Slc51a	-2.51275	0.00694935913852269	Down
Muc3	-2.52055	0.000716077149162006	Down
Pdp2	-2.52312	0.00110687912806985	Down
Gpat3	-2.52527	4.93918953511847e-05	Down
Lct	-2.52851	0.000525013133281415	Down
Agmo	-2.53136	0.000988529843686455	Down
Cdt1	-2.54434	0.00523278700171074	Down
Cndp1	-2.55343	0.0116222919404876	Down
Eps8l3	-2.56313	0.000811320592601969	Down
Dpyd	-2.56633	0.000593139913382625	Down
Sprr2a2	-2.56949	0.00453178918255823	Down
Gk	-2.57928	3.56942072342297e-05	Down
ATP6	-2.58883	0.0027058553239283	Down
Cldn4	-2.58955	0.0109983919305324	Down
ND4L	-2.59784	0.00147305771035652	Down
Lratd1	-2.59984	0.000333896693424553	Down
Slc13a2	-2.61517	0.0093424791528988	Down
Tpsg1	-2.6239	0.0331911440074526	Down
Cldn3	-2.63095	0.00109483490057352	Down
Ptprr	-2.64053	0.000143144863769946	Down
Atf3	-2.64362	0.00511955261974986	Down
Nkiras2	-2.65019	0.00577958635608542	Down
Tmlhe	-2.65548	0.000176939951607588	Down
Lrrc8b	-2.65763	8.8110032457042e-06	Down
Slc26a2	-2.66632	0.018592837077315	Down
Npas2	-2.67893	4.4417931741096e-06	Down
Prss32	-2.69656	0.0010929049225425	Down
Selenop	-2.70183	4.8909150490983e-06	Down
Npc1l1	-2.7025	0.000465027378731821	Down
Fcgbp	-2.71198	0.0339830436028829	Down
Amn	-2.72818	0.0017784727445896	Down
Tnfaip8l3	-2.73311	0.00113149421811563	Down
Btnl6	-2.74142	0.000104555258287584	Down
Clec2e	-2.7418	0.000900557674570744	Down
Chmp4c	-2.74754	4.77238452388967e-05	Down
Sct	-2.75985	0.0241756766394093	Down
Btnl5-ps	-2.76326	0.000883262093073081	Down
Ceacam1	-2.77114	2.09022991293175e-05	Down
Eif4ebp2	-2.78269	9.13152556078661e-07	Down
Snord3b4	-2.78736	0.0250779445792054	Down
Slc7a7	-2.79198	3.40545352088605e-05	Down
Ly6g2	-2.83649	0.00151469538743114	Down
Clca1	-2.84462	0.00148381952585912	Down
Hes2	-2.85139	0.00148958701030145	Down
Mb21d2	-2.8528	0.000178444655701863	Down
Pla2g2f	-2.85291	0.0276025374617921	Down
Ly6m	-2.86575	0.000288266033299227	Down
Malrd1	-2.87144	0.0364284185496476	Down
Atpaf1	-2.89406	0.0180661866799647	Down
Slc52a3	-2.90136	4.34034178617348e-05	Down
Sowaha	-2.90862	8.32485907623257e-05	Down
Bend7	-2.94388	6.62017664473033e-05	Down
Slc9a3	-2.95256	0.00179628135073626	Down
Slc23a1	-2.96921	0.00938782204360965	Down
Tiam2	-3.04566	0.0187607496615897	Down
Cgn	-3.04566	1.82246885621807e-05	Down
Pck1	-3.05334	0.000461014324999062	Down
Cyp4b1	-3.05364	0.00027141785440827	Down
Slc28a1	-3.0852	0.00639039505394217	Down
Cript	-3.08699	0.000802369477862226	Down
Slc1a1	-3.09936	0.00815142425130404	Down
Dact2	-3.11051	0.00420646648954183	Down
Cyp2c55	-3.12212	0.0416445195033451	Down
Pdlim2	-3.14633	3.01196048845743e-07	Down
Slc5a11	-3.23243	2.07372465519211e-05	Down
Trim38	-3.23396	0.0023326156555127	Down
Phospho1	-3.25882	0.00937686939969364	Down
Slc28a2	-3.26695	1.93846118535133e-05	Down
Btnl4	-3.28137	0.000471063548431887	Down
Slc23a4	-3.30973	0.000856600578696019	Down
Prss30	-3.31476	0.00033906832980946	Down
Bnip5	-3.31955	5.35784977535069e-06	Down
Defa26	-3.3847	0.00449949194190978	Down
Cyp3a25	-3.40095	0.00290967458426959	Down
Slc5a8	-3.40347	0.00766754580864777	Down
Clca4a	-3.40424	1.04656018116699e-05	Down
Slc22a4	-3.41443	0.0209978183524043	Down
Unc93a2	-3.43949	0.0012345655263581	Down
Slc5a4a	-3.45938	0.00526745936951117	Down
Unc5cl	-3.4969	0.00029441112517747	Down
LOC115487699	-3.67079	0.00234221525179197	Down
Slc6a19	-3.72856	4.1838073892193e-06	Down
Zswim5	-3.73108	4.21083695117307e-05	Down
Ido1	-3.78031	1.58783803458524e-05	Down
Adgrg7	-3.78404	1.00001989703807e-05	Down
Gsdmc4	-3.8061	0.00289836033707041	Down
Spry3	-3.96805	0.00250244836591896	Down
Slc34a2	-3.9997	0.000138956415511488	Down
Fosb	-4.00955	2.48451701278704e-05	Down
Bambi-ps1	-4.01846	0.000246364520582523	Down
Tmigd1	-4.02033	0.00416426217272923	Down
Enpp7	-4.0215	1.31427351330481e-06	Down
Mexis	-4.05794	0.000202690089312642	Down
Apol10c-ps	-4.13116	0.000867639227761663	Down
Xpnpep2	-4.13675	4.68819863608831e-07	Down
Defa5	-4.30397	0.0023405872037839	Down
Cldn23	-4.33588	0.000542185779589252	Down
Acot12	-4.42973	1.3903370301561e-07	Down
Slc5a4b	-4.43491	0.00010840170466994	Down
Mgat4c	-4.50014	0.00068745178438541	Down
P2ry2	-4.69206	6.90924950280044e-05	Down
Vnn1	-4.73459	1.48423013871396e-08	Down
Osr2	-5.12507	1.23337067404743e-10	Down
Slc17a4	-5.40505	3.00384296594377e-07	Down
Myrfl	-5.52339	6.77527473142842e-05	Down
Cubn	-6.42029	9.27316003781364e-07	Down

## Sheet: Table S1-kidney
geneID	log2(fold change)	p-value	Regulation
Ces3b	4.34904818320722	0.00958314240702976	Up
Cyp1a2	4.30693121113845	0.000408725873372286	Up
Gulo	4.11401865344035	0.000537003560665194	Up
Mbl2	4.0784524051717	0.0233429830981798	Up
Hamp2	4.04931377536658	7.45610251549659e-07	Up
Cyp3a11	4.01098330481637	0.000327848721953277	Up
Dbh	3.9902734570475	0.022329676378609	Up
Uox	3.96521067323328	0.00102718339991637	Up
Mug-ps1	3.94011762563322	4.30096753740813e-12	Up
Fabp1	3.87292430401438	0.000272033932205318	Up
Cyp3a25	3.86045504986395	1.93320390066079e-11	Up
Clec4f	3.83912924875185	0.0105788602731131	Up
Mat1a	3.83693088116433	0.00437809957389311	Up
Cyp2c68	3.83244619902935	0.00196339520957979	Up
Alb	3.78516834699905	0.00129232041045441	Up
Sds	3.71995389384165	1.50968496845156e-05	Up
Abcb11	3.66240209974141	0.000442384653471081	Up
Cyp2c29	3.64179373501032	0.000936706962288469	Up
Cyp8b1	3.62421078093465	1.03628342348494e-10	Up
Hsd17b13	3.61414588404099	0.027243493826777	Up
Tat	3.61389414656499	0.000423121982416253	Up
Ugt2b36	3.58787807829778	0.0150941940905655	Up
Ces1c	3.53323756679932	0.0011190106733511	Up
Apoa1	3.47155333196537	0.000730541204847903	Up
Slco1b2	3.46428557076288	0.00227486046175826	Up
Gstm3	3.45881337837803	1.3398983661905e-06	Up
Apoa2	3.41240880721214	3.06851228492954e-05	Up
Cyp2a12	3.38084631136725	0.00226705313577652	Up
Akr1c6	3.37900163375593	1.68330689127818e-05	Up
Cyp2c54	3.32689350552661	0.0162157630972229	Up
Ugt2b1	3.32229780182477	0.00445439841031074	Up
Apoc4	3.31055523551888	0.00791732847541443	Up
Cyp2c50	3.30457816819047	0.00403203785481535	Up
Apoa5	3.2980687836755	0.00120869053857965	Up
Cyp2c70	3.28164950654308	0.00611047992505314	Up
Arg1	3.24351586676887	0.000906921814828782	Up
Mug2	3.23516204340516	0.00021559064719296	Up
Cyp2d10	3.22549360247123	0.0145339845156224	Up
Rpl13a-ps1	3.22082020355946	2.69295391768599e-05	Up
Aqp9	3.21638280289909	0.00113042336729237	Up
Pon1	3.20163768092924	0.00199927012021731	Up
C8b	3.20108692125543	2.17008566999531e-06	Up
Mug1	3.18796693219463	0.00337079039427662	Up
Gckr	3.15875994516193	2.83171974379136e-07	Up
Slc27a5	3.15746633657053	0.000813107021669296	Up
Nrn1	3.14176740272864	1.08708501421231e-09	Up
Plg	3.13448180443635	0.00507579488801183	Up
LOC118568479	3.12221293741935	0.000854176645464265	Up
Apof	3.09464829315505	0.00172667323760059	Up
Kng1	3.08001606030089	0.00105268887770409	Up
Lipc	3.07799516980125	9.22530220108744e-06	Up
Sec14l4	3.07736954568794	5.90423562419599e-09	Up
Asgr1	3.06293404246501	0.00525596673443052	Up
Apon	3.06089568623919	0.00598860710552706	Up
Vtn	3.04245623142603	0.00184097502395709	Up
F12	3.02926996299837	0.0434946635749925	Up
F2	3.02785317305779	0.00181074443591337	Up
Creb3l3	3.02471083758412	1.32398077759654e-06	Up
LOC118568359	3.02332671885663	6.03984975831914e-05	Up
Sult2a8	3.0221447079547	0.0288369988044276	Up
Hal	2.97799494882207	0.00959821816704338	Up
Serpina1e	2.94846621513653	0.0181213932359136	Up
Ces3a	2.92841553167275	0.00951218142731343	Up
F10	2.91761380099987	0.00330502568463866	Up
Crp	2.88935690238579	0.0202892813481941	Up
Mup10	2.87881539879457	9.16051165810299e-05	Up
Cyp2d13	2.85900878958465	0.00456149763849099	Up
Cyp2c67	2.85566728782084	0.0446363238894857	Up
Mup3	2.85133232383654	0.0333044331588525	Up
Apoc1	2.84378145056799	0.000267070667378487	Up
Wfdc21	2.81036322143014	4.35207163288826e-07	Up
Cd5l	2.80342469472228	1.2241685551738e-05	Up
Rdh7	2.77064721458368	0.00210491287736665	Up
Dlk1	2.76273446920457	0.0182765669953014	Up
Asgr2	2.76244158366829	2.1228465636702e-06	Up
Hc	2.75593887300271	0.042417372717838	Up
Gls2	2.74563023551601	2.07506021536093e-07	Up
Serpina3k	2.67904317307397	0.0406397844631005	Up
Slc38a4	2.67750644492621	0.000277587027151362	Up
Adh4	2.63613016706668	0.0262241910280979	Up
Serpinc1	2.62289868388393	0.000674144371558843	Up
Lect2	2.60561014705929	0.000212620074141776	Up
Tdo2	2.59679053124586	0.0027593107172476	Up
Serpina1c	2.58731743136533	0.00107449102194727	Up
Agxt	2.58568080007772	0.0296966462728029	Up
C4bp	2.58276291306674	1.72210903146075e-05	Up
Tfr2	2.56399633439968	0.00431958730316002	Up
Hpx	2.56048976760532	0.0325709849654337	Up
Slc10a1	2.51769094238817	6.16639600879391e-08	Up
Fgb	2.50968299692321	0.0247724177358144	Up
H2-Q10	2.4391200830558	0.000152089380521478	Up
Mst1	2.43171446372037	2.65656307027231e-06	Up
Gck	2.41431891585219	0.000142479917219278	Up
Cfhr2	2.38076553387865	0.000574033965622857	Up
Tmprss6	2.3760017273086	1.12812869075407e-05	Up
Fetub	2.36808129489144	7.77995278143323e-10	Up
F9	2.31728322974999	0.0153587379330958	Up
C9	2.31668361361966	0.0246383743657749	Up
Cpn2	2.31578147926685	3.32796282203735e-05	Up
Bhmt	2.29376538141658	0.0016483004691776	Up
Itih3	2.29293601302382	0.0114740864871721	Up
Ambp	2.29280569981439	0.00214820608367626	Up
Hamp	2.2926980824556	0.0349798468504869	Up
AI182371	2.27014961170229	1.87597620799536e-07	Up
Cyp3a13	2.25430167813631	0.000238212757279719	Up
F5	2.24560803725498	1.07461866325125e-06	Up
Rps25-ps1	2.23608241107886	0.020110299266432	Up
Angptl3	2.18719407754851	0.000606072509971826	Up
Serpina3m	2.15477714446871	0.000692518260938003	Up
Rbp4	2.14752520650812	0.0011999245208098	Up
Cyp2d37-ps	2.10157726104952	0.00310933265263263	Up
Nr1i3	2.08802532358796	0.00476177099026182	Up
Ttr	2.08665467764565	5.90536231294016e-05	Up
Gstp3	2.08090564922008	0.000372837591233919	Up
Apoh	2.05091884569805	0.00625877042995805	Up
Fgl1	2.04623075878577	0.0227123246044116	Up
Hrg	2.01109267583268	0.0191189815256711	Up
Hsd3b5	1.97979655530286	0.0200998499604145	Up
Ugt2a3	1.96059898087141	6.07778140706282e-05	Up
Gypa	1.95882777259735	0.00752413872099512	Up
Itih4	1.95512389633826	0.0198970233452973	Up
Serpind1	1.94514467900646	9.45554018489966e-07	Up
Cpb2	1.94213198929628	1.38115135506393e-05	Up
Serpina1b	1.92178326995307	0.00861372388855224	Up
Fgg	1.89958682563796	0.0402272723759899	Up
Abcb4	1.89820638947537	0.00260143870377811	Up
Akr1c20	1.85256696683167	0.0175655856892598	Up
Rgn	1.8503396275467	0.00625268789098209	Up
Apcs	1.84183246663668	0.000173548302765912	Up
Rbx1-ps	1.77915343020207	0.0141073722809157	Up
Apol11b	1.7699235508749	0.0323651409395618	Up
Cyp4f14	1.76924850303782	3.55879617471459e-05	Up
Hbb-bt	1.76816592157601	0.0108013749645088	Up
Scand1	1.76392402486674	0.00142995035535243	Up
Rny3	1.75060440135033	0.000319786994700283	Up
F7	1.75028162985916	0.0121972348724286	Up
Pemt	1.73173021985684	1.47313713169279e-05	Up
Trank1	1.70164411472795	0.0157707692474597	Up
Apoc3	1.69499922877181	4.01830373004668e-11	Up
Mtarc1	1.6942684520658	8.12438707804473e-06	Up
Foxa3	1.67548243230361	0.0117099747099497	Up
LOC118568718	1.66115134961527	0.0352951460093803	Up
Aox3	1.64381736984826	6.00840707302649e-05	Up
Trf	1.62541956107366	0.0110115820783739	Up
Gc	1.61604656352906	0.00286056739235651	Up
Sec14l2	1.61557478657678	3.35657415482074e-05	Up
Gstm6	1.61204704629563	8.80850289069893e-05	Up
Nr4a3	1.60756452530145	0.00357819583943505	Up
Hba-a1	1.58536566465135	0.00251788783398634	Up
C6	1.57898658460956	0.00308972698649677	Up
Bbox1	1.5735866788137	0.0109998962370653	Up
Lcat	1.54951428043717	0.000147644016801315	Up
Ang	1.54608587041632	0.000787695615888122	Up
Serpina10	1.54335920771147	0.00538039271936465	Up
Nr5a2	1.53957098593839	0.0103128866592739	Up
Pglyrp2	1.52061020254709	0.000369271699615848	Up
Mir155hg	1.51777567905543	0.0296024839279744	Up
Masp2	1.51584226180826	0.00280253141160114	Up
LOC100861738	1.50950742740952	0.0157167096886773	Up
Prg4	1.50611005223441	0.00762680212124465	Up
Plxnb3	1.50228128756574	0.021987704871339	Up
Baat	1.48951669808923	0.00133497329649775	Up
Serpinf1	1.48866622055058	1.27715047188052e-08	Up
Slc25a47	1.48235801963759	0.000129749556921578	Up
Hba-a2	1.48150775132058	0.0035201990568943	Up
Mpig6b	1.47972327873368	0.00634536734275471	Up
Serpine1	1.4579338750104	0.000857665867856542	Up
Itih1	1.45767557857061	4.83062600607612e-05	Up
Rpl15-ps6	1.45533833719669	0.0390574237829444	Up
Hbb-bs	1.42118985333969	0.00546894957444473	Up
Chkb	1.39463839939248	0.0288374534526196	Up
Pdia2	1.39378015191648	0.00836690213240996	Up
Snord49a	1.38957296212214	0.00663665118205195	Up
Tpt1-ps5	1.35178533400524	0.00434239095846734	Up
Rpl30-ps3	1.35090030188859	0.000522766824415359	Up
Aqp8	1.35015881496579	0.00144254090735538	Up
Nkapl	1.33229159157887	0.0117800330563015	Up
Gbp2b	1.32198559239427	0.0165132250046126	Up
Ecrg4	1.30629595353813	0.0122620628439036	Up
Uba52-ps	1.3029017681312	0.0218126810410668	Up
Itih2	1.29442936777545	6.47796272915722e-05	Up
Pgam1-ps1	1.29401471613367	0.0318493347988055	Up
Ppbp	1.29129968204104	0.0108707247442232	Up
Cyp4f15	1.28279808268137	0.0058153417239631	Up
Saa3	1.24242134165351	0.0285267836930762	Up
Cd276	1.23445810917466	0.0217067660872669	Up
Acr	1.2123735577101	0.0365468389884542	Up
Rnase4	1.20592733179314	1.79924860532093e-06	Up
Urah	1.18255389832518	0.0435786232291195	Up
H2-DMb2	1.16468356306365	0.0456659064571539	Up
Muc3a	1.15215933066957	0.0380550600444313	Up
Ccnf	1.12957396048202	0.0472769446265228	Up
Tnfrsf4	1.12154899310969	0.0359119059942091	Up
Cdk1	1.1005884922296	0.0203052213875781	Up
Stra6	1.07776194208785	0.0302006656375111	Up
Ptafr	1.06059249961286	0.0135687237733604	Up
H1f10	1.05125964777578	0.00567289198025637	Up
Agmat	1.04924894404181	0.00725888368678669	Up
Abca6	1.02423604516028	0.03808198595728	Up
Cfi	1.02348066351456	0.00014938364314636	Up
Apoe	1.01617770404733	0.00284013393892826	Up
Ube2c	1.01215731870395	0.0206579344695459	Up
Aldh1a1	1.00088454723263	0.00145726249292618	Up
Cps1	3.63923	0.000326184683552545	Up
Ahsg	3.51172	0.00350696725331262	Up
Otc	2.69555	0.0112770695158884	Up
Zbtb16	1.56696	0.0224752854320626	Up
Snca	1.39677	5.95638262432615e-05	Up
H3c14	-1.05536	0.02569442443918	Down
Kbtbd8	-1.10976	0.0294755430925119	Down
Lep	-1.1206	0.0346301706777575	Down
Svop	-1.22608	0.0168147328604082	Down
Stkld1	-1.45318	0.0379596268908061	Down
S100a8	-1.76277	0.0304395382142652	Down
Havcr1	-2.22254	0.000100545138185706	Down

## Sheet: Table S1-liver
geneID	log2(fold change)	p-value	Regulation
Apol11b	3.77346520300499	0.00136222475328012	Up
Dbp	3.52359775987964	2.95923690086354e-15	Up
Slc4a1	3.49446687986388	0.00586023554819026	Up
LOC118568792	3.35096130082851	0.000875715636150447	Up
Slc4a9	3.22205317510229	7.67074391151211e-05	Up
Rps25-ps1	3.21490281659457	0.00421541545345235	Up
Knl1	3.20616305634992	5.44316727072755e-06	Up
Rgs16	3.14199885845304	4.53199614345279e-07	Up
Gypa	3.13953053885995	0.0241920271079645	Up
Neil3	3.11215997871063	0.000167914470756221	Up
Ckap2l	3.10015366838583	0.000253519944768914	Up
LOC115488029	3.05185269057776	0.000481519981674309	Up
Bglap3	2.89854391581984	1.40947502407833e-07	Up
Sytl5	2.87299843761985	2.503990163398e-08	Up
Snca	2.83398687749805	0.0211390992385649	Up
Rpl23a-ps4	2.82029869764729	1.44211297814255e-05	Up
Neurl2	2.81980527843086	4.61176452464017e-12	Up
Nrg2	2.69195262652821	0.00249739100587957	Up
Per3	2.65542966562052	1.23763148811532e-15	Up
Rn7s2	2.5952076999045	0.00670261838823559	Up
Cib3	2.59066501764159	0.000623316260813026	Up
Slc22a27	2.58163183018978	0.000263251046001558	Up
Hba-a1	2.57245725844082	0.00165345105460953	Up
Upp2	2.5595733373667	2.47189041421319e-49	Up
H19	2.55205673874484	0.0386372524448556	Up
Cenpf	2.52471331962985	2.65017949832902e-06	Up
Mki67	2.51340314560595	0.00274391727300614	Up
Hbb-bs	2.50337257501805	2.36450891797806e-14	Up
Ntf3	2.48244979857814	0.000466118957168122	Up
Dmtn	2.47745883039669	0.000808367509956879	Up
Camp	2.45853872358529	0.00312085925416272	Up
Cyp2a4	2.43589776020598	0.0002296969927079	Up
Hbb-bt	2.39515793481984	0.0021467199831279	Up
Mis18bp1	2.38080928772947	0.000286003711364708	Up
AA465934	2.28124209217258	0.00345710591242021	Up
Slc22a26	2.27622014123476	0.00924187104549079	Up
Cish	2.20965052768668	0.00384750147066282	Up
Cracr2a	2.17178555849324	0.000427316016478931	Up
Cyp2b9	2.16783850852197	0.0137159458505082	Up
LOC115486410	2.15568056907038	2.4810205595994e-06	Up
Clspn	2.15103611069152	0.00251883406619221	Up
Top2a	2.14419195416592	0.0042865752594613	Up
LOC118567748	2.1426163003144	1.93563792282643e-06	Up
Clec2h	2.14233403149794	0.0313245754660928	Up
Spag5	2.13949440052552	0.000427163149476811	Up
Hba-a2	2.11574099652482	0.00365107259521323	Up
Cux2	2.11110999856388	0.000108625004077135	Up
Platr25	2.10666293582152	0.00050380699083319	Up
Rab44	2.0845683303037	3.9971882473503e-05	Up
Cenpe	2.05508976433707	0.000297298301715775	Up
Egr1	2.05202786860961	0.00324145738291511	Up
Tmc3	2.04970305588918	0.00122607437931822	Up
BC023105	2.04083683082019	0.000105334511039236	Up
Il7	2.03496160571681	0.00786757415473397	Up
Iqgap3	2.03467064983762	0.011647880169129	Up
Espl1	2.02482972793535	0.000640850379562934	Up
Snhg11	2.01742691921502	4.95157906703049e-12	Up
Tmod4	2.01285518004494	0.00329668096029565	Up
Tgtp2	1.99498306409874	0.00263410355267684	Up
Racgap1	1.95813166547854	0.000618124016898625	Up
Troap	1.93767883796704	0.00612539641858374	Up
Slco1a4	1.93515868941746	1.823788448633e-19	Up
Rnasel	1.93330359660262	1.008513717038e-07	Up
Azin2	1.92764947230225	0.00182377632660094	Up
LOC118568558	1.91945783359006	0.000177291839060632	Up
Specc1	1.88791431706975	0.00117928643144639	Up
Gria3	1.88062806173323	0.000263717505612935	Up
Ssc5d	1.87791570749702	0.00425997495535516	Up
Gdap10	1.84787904387199	0.000593821358228591	Up
Col25a1	1.8467378753289	0.00319255178505792	Up
Klhl23	1.83544719018654	0.00150446323231862	Up
Rad51ap1	1.8299829508793	0.0218164194339844	Up
Map3k6	1.82833945957509	0.000182838570814309	Up
Cyp46a1	1.82194800185127	2.81840811827013e-05	Up
Mpig6b	1.81202497462201	0.0149359745405299	Up
Nipal1	1.80219244872493	2.208503884449e-09	Up
Ltf	1.80198525991686	0.0303460288774814	Up
Gimap5	1.80142155916908	0.00142267274667621	Up
Hdac1-ps	1.79061633919729	0.0147366059854923	Up
Plk1	1.78904062277934	0.00505882268679477	Up
TrnN	1.77685696159102	2.92953171462132e-14	Up
LOC115489602	1.77621931370766	0.00518742608643288	Up
AI504432	1.76846634488862	0.000517557694929896	Up
Gpcpd1	1.76114584877739	2.04095113386727e-12	Up
Fmo2	1.75861836982669	2.98281652530716e-06	Up
Nr1d2	1.75290010300465	9.10783152935356e-11	Up
Fmo3	1.7465998088469	0.00255512697770586	Up
Foxm1	1.74291118921375	0.0108327136810305	Up
Cyp2a22	1.73689256346852	2.30335449764369e-06	Up
Cyp7a1	1.73434715515777	3.0841468956829e-12	Up
Cables1	1.7302713702019	0.00334639961752374	Up
Tk1	1.72576029859777	2.34691067109806e-12	Up
Anln	1.72442401631372	0.0134397784948177	Up
Nr1d1	1.71817224353186	3.784906134462e-11	Up
LOC118568117	1.71652327116088	1.2678400562609e-07	Up
Sorbs3	1.71621384227681	5.54317158210323e-16	Up
Zwilch	1.7153397856746	0.00635126508698663	Up
Fam13a	1.70807277761824	1.56473753684695e-10	Up
Kcnn4	1.70796804255633	0.0125472519709948	Up
B3galnt1	1.70777057861464	0.00907969790338149	Up
Tnni3	1.70493035337978	0.00133403159629242	Up
Snord42a	1.7028610905794	0.0277924151679187	Up
Adgrd1	1.69013345688633	0.0120833692607217	Up
Esco2	1.68855975466521	0.0100466635074721	Up
ATP8	1.68799581459714	0.00401253288601574	Up
Socs2	1.68492435091035	1.73242818852086e-07	Up
Ptch2	1.6795951912639	0.022329843708372	Up
Abcd2	1.67800337955675	0.00430753317204627	Up
Tef	1.67584909094521	2.53889814560915e-10	Up
Matk	1.67325849706075	0.00662688111729456	Up
Clca3a1	1.66500948446366	2.33277857030061e-09	Up
Mfsd2b	1.65610808392531	0.00056477225809909	Up
Gys2	1.65216326592896	7.58510784986485e-17	Up
Gpr132	1.64630369948376	3.72397577474421e-05	Up
Zc3h6	1.64383692709411	2.38039059865741e-10	Up
Slc9a5	1.64296992345564	0.0011256902000217	Up
Nusap1	1.63857776615732	0.00597144908799712	Up
Spic	1.62668698251671	0.000308350594581864	Up
Gpr12	1.62430389962625	8.97789030063333e-05	Up
Zfp808	1.62191965577326	0.0285644594045386	Up
Cdk1	1.61899412545165	0.00388228829498211	Up
Birc5	1.61736350730191	0.000101589993558184	Up
Car2	1.61537716704333	0.00274054105767904	Up
Nos3	1.61448114111199	0.000293147809865017	Up
Bvht	1.61428041878217	0.0113935570104525	Up
LOC118568684	1.61031578741157	0.00643487531979585	Up
Slc28a2	1.60987033421018	0.000102714969920206	Up
LOC118567599	1.60593989682001	0.000109927636714669	Up
Gp9	1.59997131040819	0.0101943647533059	Up
Abcg5	1.59686310093969	1.57794499049075e-11	Up
Ppbp	1.59533683005743	0.000441846719435432	Up
Marco	1.59022396650375	0.0478918390503243	Up
Chtf18	1.58520632502038	0.0175289810601083	Up
Zbed5	1.58491846209313	8.4504792444482e-05	Up
Plk3	1.58361786289568	1.32295720623786e-12	Up
Gnaz	1.58251712326631	0.0239838130191186	Up
Cit	1.58063203115691	9.17756529664928e-09	Up
LOC108167751	1.57897939682396	0.00268745826004538	Up
Slc7a6	1.57871920676589	0.0345667468759336	Up
Adamts6	1.57020897699569	6.82223722478522e-05	Up
LOC118567442	1.56071450489702	0.000788514708442766	Up
Ptpn22	1.5605149446141	0.000237430885783812	Up
Tlcd1	1.56030433158464	4.59347432603606e-12	Up
Sytl2	1.55645123664119	0.00996748243752689	Up
Hmcn1	1.5558883709573	4.99167877952283e-05	Up
Prc1	1.5465069397429	0.018508277955318	Up
Afap1l2	1.54563828503703	0.00444394151666261	Up
Kif15	1.54202958430457	0.00293495306148088	Up
Fam117a	1.54128133775113	0.000320468424833982	Up
H2-Q7	1.54056853203905	0.00278664670746536	Up
Gbp3	1.53695260304956	3.57030133517385e-07	Up
Serpina3g	1.53328119583836	1.44196068725085e-06	Up
Sgcb	1.53075567974892	0.0204003909606657	Up
Cep112	1.5305818776988	0.00616294753166486	Up
Mettl7a3	1.52297889956455	0.0169798864315879	Up
Csad	1.52123604917884	6.60692958692166e-11	Up
Bcl11a	1.52102153120441	0.00415957776190948	Up
Tmcc2	1.51891847544551	0.000264365072692593	Up
Pif1	1.51367933399985	0.0369981493153473	Up
Robo1	1.50077538587684	0.000489927847527161	Up
COX3	1.4970021852878	6.65435921815005e-13	Up
E2f7	1.49021929453547	0.0237887922494388	Up
Bub1b	1.4860276372281	0.00601394294032642	Up
Tspan3	1.48436534731486	0.0202309892108039	Up
Slamf8	1.48101949105442	0.0235904318145031	Up
Mkln1os	1.48053586440598	0.030752467136252	Up
Cyp3a59	1.47288613697221	1.9811574909589e-06	Up
Papss2	1.46760966812224	3.14927368770343e-18	Up
Rad54l	1.46477428073354	0.0101262968564441	Up
LOC115488070	1.46178129440239	0.0227816443292754	Up
Gbp4	1.4604891719223	1.02954385692814e-06	Up
Btla	1.4588549204667	0.00914623267298329	Up
Dbf4	1.4579848282567	0.00200273822968221	Up
Ccna2	1.45290229703879	0.00837811101885284	Up
Ccdc18	1.44782276455097	0.00316298011044497	Up
Glt1d1	1.44755771075043	1.56892733751047e-10	Up
Sybu	1.44127770866011	0.0318577808730388	Up
Lef1	1.43863895225719	0.00797819550822037	Up
Aim2	1.4322396160875	4.59247500689538e-06	Up
Cpsf4l	1.42994309718134	0.00058484267074383	Up
Dio3os	1.4295719905012	0.00707062907644634	Up
Kif20b	1.42803637015357	0.00377404773634004	Up
Caprin2	1.42447352827614	0.00147281497336939	Up
Clcf1	1.42390206472013	9.26265038049875e-05	Up
LOC118568000	1.42113844117817	0.0147332208682121	Up
Gbp2b	1.41731775798796	0.000164860347252257	Up
Cyp17a1	1.40703888967861	0.00290579228820631	Up
Otulinl	1.40674819085095	0.000318990644211153	Up
Naip6	1.40120578783454	0.0359018698357912	Up
Prim1	1.39104426816837	0.00864622031387576	Up
Cdca2	1.39024758796522	0.0334743231675758	Up
LOC68395	1.38932114372125	0.030159339187265	Up
Cdc14a	1.38283150773601	0.012456408575009	Up
LOC118567607	1.38085637169666	0.000955845733943119	Up
Rasal3	1.37869488859594	0.00333122243415421	Up
Tcf19	1.37772693015055	0.0217060146791432	Up
Batf3	1.37762196272857	0.000121087887582053	Up
Atp8b4	1.37641405562218	0.00696275561560871	Up
Sftpa1	1.37366989381123	0.00250836333265111	Up
Hmgb2	1.37138262484653	0.000103652159249361	Up
E2f2	1.36299607142284	0.00797421710858736	Up
Kif23	1.36191896196475	0.00269303266017455	Up
Osbpl3	1.36108398676388	0.00292943102522842	Up
Pclaf	1.36069274765775	0.0089205049409748	Up
Rmrp	1.35982905635704	0.0155843714452421	Up
H2-T10	1.3576362366326	0.000164665629737617	Up
Tnfrsf19	1.35677650086869	0.0117994291246644	Up
Runx1	1.35313436393486	0.00150880581352615	Up
Fbxo5	1.34937036328074	0.00496547125967063	Up
Ncmap	1.34820111247297	0.00561229256214032	Up
Rubcnl	1.34342361715576	0.0327406074075214	Up
Ccdc120	1.33977203922309	0.0056296180146168	Up
Ccdc88a	1.33774364761822	5.73650246516274e-07	Up
Pld4	1.33289655224032	2.41760542941893e-07	Up
Morrbid	1.33256187612353	0.00342107434364538	Up
Neil2	1.33071297494718	0.0247111397408299	Up
Slc16a5	1.33041075449884	3.96367765446917e-05	Up
Lat2	1.33031587477941	0.00844150265368858	Up
Selplg	1.33008149663056	0.0010386318531791	Up
Ovgp1	1.33006817542931	0.0161422081200992	Up
Nt5e	1.32923629381523	0.00412871354483703	Up
Samd14	1.3270065775515	0.0362824831667441	Up
Accs	1.32529545018761	6.60090888371316e-05	Up
Cdr2	1.32278115249018	0.0169059572184884	Up
Smc4	1.32109039958565	3.66506005355883e-07	Up
Fhl3	1.3204903029532	0.0153735847911911	Up
Erbb4	1.3177976627668	0.00108637698225824	Up
Anxa1	1.31691104202734	0.0273293297602557	Up
Sla	1.31652151979047	0.00308506768323023	Up
Lpin2	1.31216648297387	1.39111609597596e-07	Up
Pltp	1.3115986013495	9.97243240780266e-06	Up
Zgrf1	1.31117868736975	0.0142951304059614	Up
LOC115486429	1.31068040890001	0.0026731276534178	Up
Rad51b	1.31047177615382	0.0423201443587508	Up
Card11	1.30764700835756	0.0110129060241814	Up
Flcn	1.30695299854548	1.93084123158468e-10	Up
Mthfd1l	1.30465722372175	0.0404323397794091	Up
Zfp993	1.30288850804392	0.0138469639587897	Up
Atl1	1.29992175510059	0.0270547935108296	Up
LOC118568191	1.29542822800304	0.000839720600259451	Up
Vldlr	1.29322958695177	0.00392530451939563	Up
Ptpn7	1.29097864308298	0.000259647175241547	Up
Snord49a	1.29045747838529	0.0219764302812181	Up
Tmem131l	1.28985712301634	4.38437884996824e-06	Up
Casp1	1.28565326931298	0.000617968799744931	Up
Ncam2	1.28305754854834	0.00720238289568473	Up
Tctn1	1.27934929613669	0.00707189014345463	Up
Cacnb3	1.27701233634032	0.0156182049916012	Up
Tent5c	1.27669152215454	0.000115195784657232	Up
Ncapd2	1.27654867283837	4.99869224883473e-05	Up
Nkapl	1.2740131460569	0.016536603678141	Up
Rwdd3	1.27370683966081	6.51535917154498e-06	Up
Gbp8	1.27319574654738	5.96002762798099e-06	Up
Cd28	1.26566585741959	0.0357687972099949	Up
Lrp2bp	1.25865506754176	0.0486883095840466	Up
Arhgap33	1.25340083662785	0.0211759340891777	Up
Kifc5b	1.25270596266718	0.0090073781850318	Up
Ache	1.2504640847015	0.0214817366261624	Up
Optc	1.24460441954729	0.039759147960066	Up
Smc2	1.24449593304898	0.000840399458232284	Up
Il18rap	1.24422795640188	0.0136238221266474	Up
Klhl6	1.24350839204897	0.0208796874013476	Up
Rgs10	1.24285363809949	0.0255652825871124	Up
Resf1	1.24014415251314	3.12992395670379e-07	Up
Cd274	1.23904350767906	0.00205537847968935	Up
H2-K2	1.23854984790817	9.70193086566388e-07	Up
Naip3-ps1	1.2382121637881	5.5672496810796e-06	Up
LOC115490527	1.23778439746985	0.038349833207968	Up
Mfsd2a	1.23494573659586	0.00142031323952511	Up
Cdc25b	1.23292370801906	0.0279569625315313	Up
Gpr162	1.23193541464808	0.0313810745781399	Up
Trpm2	1.2298213545124	1.18302673272528e-06	Up
AU020206	1.22682127557919	6.31974655253686e-06	Up
LOC118568748	1.22510254147018	0.00206573618388524	Up
Nr1h5	1.22421097685443	2.40630816449691e-05	Up
Cep70	1.22160493140536	0.000101022452831117	Up
Hk2	1.22123472276551	1.05699088578843e-05	Up
Arhgef39	1.2203629888036	0.0380627541013518	Up
Adgrl3	1.21988027313897	0.0154321289075141	Up
Tlr1	1.21960768965902	0.00154110002154047	Up
Spata24	1.2193086213693	0.0305500323199554	Up
Rasgrp1	1.21896244467496	0.00212357746612521	Up
Tox	1.21485333015861	1.0051783011567e-07	Up
Ints6l	1.21453167428395	1.75688627365839e-05	Up
LOC118568219	1.21439633219593	0.0226227734920568	Up
Cyp2a5	1.21409030836617	0.0193874035483128	Up
Il2rg	1.21381708821838	0.000122563659110029	Up
Mettl27	1.2122147322525	4.07966660603986e-07	Up
Cip2a	1.21078524776823	0.0431623117390983	Up
Lmntd2	1.20666671423339	0.000865332497404435	Up
Rinl	1.20487508863689	0.000429505921591869	Up
Osmr	1.20178809422759	0.00470440242700874	Up
Pcsk4	1.19280496540876	9.4885325296692e-06	Up
Naip5	1.19149480647763	3.19183856382075e-06	Up
Cdca8	1.19146141265154	0.0217356388746713	Up
Nckap5l	1.18789105606513	0.00962028444584095	Up
Cd19	1.18554631118247	0.0066140921866384	Up
Zfp90	1.18484587220956	0.00188782052187936	Up
Cklf	1.1834369595286	0.040597315879515	Up
TrnY	1.18293283669779	0.00359025707316482	Up
Cacnb1	1.18194550617242	0.0110556348048253	Up
Myo1g	1.18036509664269	1.08898039374142e-05	Up
Ifit2	1.17841151665756	0.00591636047498975	Up
Fcho1	1.17783018891791	0.0425665844460267	Up
Apbb1ip	1.17760429692349	0.000835032781049339	Up
Spred3	1.17657447822074	0.0336586086110923	Up
TrnC	1.1759026508686	3.34620615858426e-07	Up
F13a1	1.17174355104805	0.0251819011339748	Up
Limch1	1.17043124064031	0.0489584748102838	Up
Tal1	1.17038618604333	0.0127227616243523	Up
Lig1	1.16836741387297	0.00159419115060745	Up
Apobec3	1.16772376890736	1.71316219669244e-06	Up
Hdac9	1.16368403772032	0.00138271647604705	Up
Cd48	1.16316614401903	0.0212518610237781	Up
Ddb2	1.16296120825914	0.0332769606802519	Up
Cc2d2a	1.16212510782154	0.000871439574335037	Up
Smyd4	1.16182035676818	0.0432066773667232	Up
ND4L	1.16137211511516	6.66878597700003e-07	Up
COX2	1.1609288335172	6.30820586035703e-05	Up
Grk3	1.16071794505367	2.89329327544221e-08	Up
Slc43a1	1.16039093969608	1.92289053056237e-07	Up
Cd300lb	1.15995099985646	0.021292002933501	Up
Rbm38	1.15670223140236	0.0100319774731205	Up
Arsa	1.15584263995162	1.07998847856014e-06	Up
Adgrg3	1.15429144849248	0.000114754435027579	Up
Alox12	1.15355653814432	0.0214635339029346	Up
Myo9a	1.15279098764183	1.46683279323294e-06	Up
Aoah	1.1527051522495	0.0043735275403915	Up
Arhgap15	1.15027314403313	0.0453563965330939	Up
Mcm5	1.14796325887802	0.0338595948286792	Up
Themis2	1.14787072931595	0.000785939460750182	Up
Plgrkt	1.14781831956475	1.22981124260026e-06	Up
Tcf21	1.14495384202331	0.0228405316336862	Up
Snord3a	1.14490807539575	0.0260741123069883	Up
Pms2	1.14324364628371	0.0477226798896941	Up
Spata7	1.14269317423858	0.0250476576561132	Up
Mfng	1.14197157735856	0.0379436773247462	Up
Ppfia2	1.14076526341981	0.0326977248519106	Up
Nlrp1b	1.13747535912555	4.63005984933967e-06	Up
Bcl2l11	1.1366693862231	6.76930978005457e-05	Up
Btbd8	1.13470823635558	0.00975205630027495	Up
Ifi213	1.13114956294189	3.4204709859055e-05	Up
Itgb7	1.12572748188025	0.000451609389440201	Up
Lyl1	1.12559429513516	0.00361646538142288	Up
Gdf15	1.12420569977457	0.00461493376144453	Up
Klf10	1.12340743321548	4.78287960810825e-05	Up
Klhdc8b	1.1231304636666	1.75721221837651e-06	Up
Fbxo31	1.12263776312762	0.000102965475925156	Up
Pik3r5	1.12193793005608	0.0389320261180105	Up
Slc2a3	1.11976849004136	0.0433388072501659	Up
Ccdc57	1.11820222129696	0.00210843717410054	Up
Klf1	1.11734968253726	0.00185553805407166	Up
Clec12a	1.1165596134354	0.000802053682071659	Up
Thsd7a	1.11400726052041	0.0446129906892968	Up
LOC118567910	1.11300914842156	0.0284068889093984	Up
Kcna2	1.11158804013935	7.9078775231506e-06	Up
Pde1b	1.11115146303692	7.81570218945796e-05	Up
Pygm	1.11072661097281	0.0458862732216802	Up
Slc20a1	1.11040388939564	1.69863743795202e-05	Up
Mbnl3	1.10617071912516	0.0168186297919238	Up
Ripply3	1.10450397957491	0.0288984311308931	Up
Anxa3	1.10431755885697	0.0113285121071139	Up
Osgin2	1.10237629182928	0.0493838060863591	Up
Tbc1d30	1.10158897841955	0.000569650648937435	Up
ATP6	1.10134506580969	1.4037188154825e-05	Up
Ifi207	1.10018426585736	1.83806277735053e-05	Up
Prkn	1.09987865380074	6.1881452229483e-05	Up
Lepr	1.0975579216006	0.00520600851423855	Up
Fbxo34	1.09590502573154	0.00093331104200828	Up
Ncoa7	1.09590055597698	0.00682048655772256	Up
Efcc1	1.09571649899976	0.00038431662884443	Up
Cenpa	1.09353005484062	0.000275634334049399	Up
Serpina3f	1.09204700110714	0.00774706732889424	Up
Lilr4b	1.09127107956327	0.00998313013087973	Up
Vrk2	1.08936122565059	0.0194119763269007	Up
Fam83f	1.08864243915792	0.037920334396765	Up
Casp4	1.08464310335451	0.000908139156639018	Up
Sult5a1	1.0836122056013	1.50500404106534e-06	Up
Htra2	1.08324244698539	0.0209692025128999	Up
Adam11	1.0806427987826	0.00106415264657397	Up
Gabbr1	1.07985171976819	1.15330888482285e-06	Up
Rap1gap	1.07951139620527	0.00246607653539105	Up
LOC102632541	1.07778755898743	0.0120620598940548	Up
Bora	1.07591114574962	0.00994205323067059	Up
Gal3st1	1.07557198610029	0.0458525410378881	Up
Gvin3	1.07440647946786	0.000836234524097151	Up
LOC118568618	1.07396155362005	0.0292214512632731	Up
Cep152	1.07005322823846	0.000389256505992096	Up
Znf41-ps	1.07004819953277	0.0154611156287008	Up
Gpr65	1.06728157452234	0.00229174658641203	Up
Slamf7	1.06585092159848	0.022668736238824	Up
ND3	1.06462196980982	4.83581116784808e-08	Up
Lrmp	1.06395414379608	0.000114492250804601	Up
Pkd1l3	1.06383686678479	0.0189301088027389	Up
Hook2	1.06266017039374	4.3241363232108e-05	Up
Rpa4	1.06235917632058	0.0385431125584459	Up
Map3k5	1.06196297660988	1.61680678424894e-05	Up
P2rx7	1.06104348262071	0.000241324097214953	Up
Dipk1a	1.06087501389526	0.0454685006479308	Up
LOC115490109	1.0598151502599	0.00430267515265035	Up
Retreg1	1.05977199016812	2.62951044149939e-09	Up
Phf11d	1.05914225340717	0.00136334825267355	Up
Armcx5	1.05864062053726	0.0241026867630849	Up
Fpr2	1.05858611243359	0.011633388209193	Up
Itgax	1.05647490600087	0.00810906199985659	Up
Ikzf1	1.05624867829039	0.00384844922659886	Up
Grb10	1.05540158680284	0.0276897113222712	Up
Dip2a	1.05452717309669	0.0305035946993217	Up
Hmgb1-rs16	1.05441037666663	0.00219253113100181	Up
Plekhg2	1.05388977254673	0.000301777783387424	Up
AI662270	1.05373066849783	0.000404375060779786	Up
Klhl31	1.0532771854205	0.0491059051794016	Up
Got1	1.05301564364058	0.000106978343522745	Up
Thbs1	1.05245680049245	0.0157444665598069	Up
Cyp3a25	1.05032222325366	3.10785311702807e-12	Up
Sun1	1.05029083038807	0.000116171373221501	Up
Blm	1.04985361121979	0.00101242391210283	Up
Slc25a27	1.0476924305014	0.00571916125070685	Up
Lama5	1.04743858482081	0.044368483682259	Up
Acss3	1.04723685267085	0.0039388376700739	Up
Ccnl1	1.0457802851319	8.35443428798035e-09	Up
Rpl28-ps3	1.04569716493979	0.0487522343897868	Up
Cep57	1.04507110097699	0.001010707445286	Up
LOC118568402	1.04289986734187	6.97351863984775e-06	Up
Zcchc3	1.04188168199279	0.0461939434859165	Up
AW549542	1.04125490219399	7.46309814217354e-08	Up
TrnW	1.04103408762131	0.0485263535946241	Up
Myof	1.0358977288729	0.0121302782616763	Up
S100a9	1.03314114197213	0.00428872528459346	Up
Spry2	1.0330212227885	0.0200921571262708	Up
LOC118568198	1.03103424170321	0.0122065737041957	Up
Prrt1	1.03049605771176	0.0396433781989915	Up
Tacc3	1.02993360137777	0.0353628686042926	Up
Acvr2b	1.02931664033855	5.44518953546875e-05	Up
Nr4a1	1.02791961821242	0.00664813005995024	Up
BE692007	1.02693123798725	0.0489531168830008	Up
Arhgef2	1.02643188689806	6.4174213420477e-06	Up
Gbp7	1.02414526386551	6.19289691452055e-05	Up
Frmd4a	1.0216484848875	0.003912961496924	Up
Txndc16	1.0210495698413	0.0172170167340701	Up
Tmem51os1	1.0185815910555	0.0349853136029261	Up
Parvb	1.01672394033831	0.00368647033851151	Up
Dcaf6	1.0164943924026	7.32685398038103e-05	Up
Slc11a1	1.01419927175929	0.000920681409188987	Up
Adam8	1.01334337895632	0.0349174133134846	Up
Ptpre	1.01320439867257	0.00325420227684736	Up
Zranb3	1.01198568643518	0.000332200179420791	Up
Slc22a4	1.01171719646643	0.0233417688605591	Up
Slf1	1.0104319717346	0.0160646945613329	Up
Ctps2	1.01009135205783	0.00365979589018198	Up
Nfe2l2	1.00902253946247	1.55496381001502e-06	Up
H2-Q1	1.00793765978888	0.00672363463969174	Up
Gab2	1.00434121226758	0.00409631824882882	Up
Cd300e	1.00415296935333	0.0327690931078855	Up
Acot4	1.00380353016446	0.0359008247347352	Up
Cyp27a1	1.00285014214547	1.42747826918324e-07	Up
Ncf2	1.00214618717911	0.00214080619589169	Up
TrnS1	3.1004	0.00453231469309917	Up
Lpcat1	1.22956	0.00652721488702002	Up
Ripk3	1.15005	0.0115831634192403	Up
Gbp11	1.13675	0.00105036435193645	Up
Rbm15b	-1.00235	0.000839661306284828	Down
Zfpl1	-1.00425	9.35676511345262e-05	Down
Rpusd3	-1.00538	0.00954479926180885	Down
Ccdc124	-1.00624	3.63506732903587e-07	Down
Eif1b	-1.00695	3.42359316031713e-05	Down
Prdx3	-1.00701	6.65115432514117e-06	Down
Mlec	-1.00783	7.0369650827336e-05	Down
Rpl18	-1.00975	3.76562517603288e-07	Down
Ubb	-1.01034	7.85129837674892e-08	Down
Tmem167b	-1.01036	1.17203004932035e-07	Down
Elf3	-1.01134	0.0227501089671853	Down
Gjb2	-1.01143	3.67495867921894e-05	Down
Atp5l	-1.01164	9.40251611209019e-05	Down
Hpx	-1.0119	0.000372858893592597	Down
Selenok	-1.01223	1.73828822287659e-09	Down
Mrps11	-1.01285	0.000762684667201369	Down
Tmem199	-1.01323	0.0197914096471901	Down
Saraf	-1.01338	7.62565758325596e-05	Down
Mrps21	-1.01468	0.000268482377534777	Down
Tmem33	-1.01578	0.000109564314657227	Down
Srp9	-1.01649	8.85315854185841e-07	Down
Tjp3	-1.01733	9.19091138114103e-06	Down
Snrpd1	-1.02076	5.60320287723596e-06	Down
Trp53inp2	-1.02106	7.37262336367572e-11	Down
Mrpl36	-1.02113	4.56277993324436e-05	Down
Wdr77	-1.02197	0.000566051083710741	Down
Taf12	-1.02222	3.89326521902197e-05	Down
S100a1	-1.02269	0.000124340404978435	Down
Fabp1	-1.02369	8.18279633335284e-09	Down
Tmem147	-1.02432	6.14679831314686e-08	Down
Ncbp2	-1.02453	0.000572887838853931	Down
Rpl7a	-1.02458	5.95618371078789e-08	Down
Tm4sf4	-1.02544	6.94120287217812e-06	Down
Tmx2	-1.02544	1.83932128999033e-05	Down
Cyb561	-1.02683	0.0215006616286668	Down
Sgf29	-1.02715	6.76868544885993e-05	Down
Mrps25	-1.02982	0.0011490352979873	Down
Rpl27-ps1	-1.03101	0.000835366711950729	Down
Etfbkmt	-1.03128	0.000746397842419894	Down
Cab39l	-1.03177	4.55399422838171e-05	Down
Mettl7b	-1.03191	1.21608433412833e-06	Down
Ube2z	-1.03198	4.20328150029355e-05	Down
Trappc5	-1.03323	8.62759597366999e-07	Down
Gss	-1.03334	6.15542913608485e-05	Down
Rpl15	-1.03503	1.18584360070118e-06	Down
Pcbd1	-1.03572	9.52394410802037e-07	Down
Krt8	-1.03584	1.13321682845786e-05	Down
Ndufaf1	-1.03651	0.000134908632698557	Down
Emc6	-1.03785	8.58824943001124e-05	Down
Ntn3	-1.03838	0.0159096187726968	Down
Cpn2	-1.03913	1.4194050077581e-08	Down
Cfb	-1.03979	9.72618284322249e-09	Down
Tle5	-1.04025	2.26273806066711e-07	Down
P4ha2	-1.04073	0.0495329433998552	Down
Chmp6	-1.04075	0.0237340502136508	Down
Pet100	-1.04127	7.4789687255108e-06	Down
Ywhae	-1.04149	3.8141123451308e-10	Down
Cct3	-1.04162	4.08506936880719e-05	Down
Ppa1	-1.04235	9.97042653911584e-07	Down
Mea1	-1.04301	0.0028185103891113	Down
Acnat2	-1.04355	3.64212818798635e-06	Down
Rbm42	-1.04622	5.73105428515424e-07	Down
Rpl19	-1.04634	2.80744721595385e-08	Down
Dynll2	-1.05013	6.09202869273813e-08	Down
Rps28	-1.05015	9.52327417926761e-08	Down
Ptrhd1	-1.05077	0.0182955021322452	Down
H2bc4	-1.05122	2.2237984735368e-05	Down
Gldc	-1.05137	6.06668031260039e-10	Down
Gvin2	-1.05148	0.034709971271851	Down
Tmem248	-1.0523	1.26701197911064e-08	Down
Rps27a	-1.05318	5.84526492248446e-07	Down
Clpx	-1.0547	3.92408564278945e-06	Down
Serpind1	-1.05483	9.08314013094182e-09	Down
Psmd8	-1.05505	8.66194180536239e-07	Down
Dnaja1	-1.05607	1.17903872017774e-06	Down
Rpusd2	-1.05692	0.00802630345788521	Down
Nos1ap	-1.05775	0.000892573241834435	Down
Mettl1	-1.05849	9.14885556180094e-06	Down
Cyp4v3	-1.05881	2.76806266035667e-12	Down
Pitpnb	-1.05883	4.16974212026116e-06	Down
Hras	-1.06017	1.3833381001753e-06	Down
Tmed10	-1.06033	4.69291917247829e-08	Down
Atf5	-1.06326	2.12803114534832e-10	Down
Mettl9	-1.06459	3.57087419439336e-07	Down
Lasp1	-1.06622	2.38762998670631e-06	Down
Jagn1	-1.06644	0.000209324768869757	Down
Naa10	-1.06667	6.41287999177876e-06	Down
Lgalsl	-1.06668	0.0016837622131722	Down
Smpd3	-1.06696	0.0116615141470271	Down
Fgg	-1.06752	5.80001207725796e-05	Down
Rhbg	-1.06785	0.0103135745875883	Down
LOC118568511	-1.07009	0.00385960896596006	Down
Slc17a9	-1.07274	0.00319008421981526	Down
Tmem160	-1.07343	1.06701956714813e-05	Down
Tspo	-1.07351	0.000524728431256571	Down
Timm8a1	-1.07472	0.00585534983337407	Down
S100a10	-1.07479	3.8665298166717e-06	Down
Got2	-1.07669	2.80554733735598e-08	Down
Ahsa1	-1.07856	7.31943568981105e-06	Down
Tada2b	-1.07857	0.00254685426992256	Down
Selenof	-1.07864	4.30104121361833e-05	Down
St6galnac6	-1.0787	4.37241799524246e-05	Down
Pgk1	-1.07971	2.1291327077822e-06	Down
Rbp4	-1.08082	1.16772429231982e-09	Down
Dtd1	-1.082	0.000167116916815516	Down
Thg1l	-1.08218	0.0275244992868726	Down
Hspa8	-1.0847	3.85827257801738e-06	Down
Iscu	-1.085	6.87607588755642e-05	Down
Rps4l	-1.08557	0.000835482700138204	Down
Pebp1	-1.08624	5.25575604466332e-05	Down
Alg3	-1.08853	6.95577273919736e-07	Down
Tpgs1	-1.08955	1.19305451483124e-05	Down
Txndc5	-1.09008	1.89424212823636e-08	Down
Ppil1	-1.09087	1.86418578637578e-05	Down
Serpina1e	-1.09091	0.0457459277761899	Down
Ttr	-1.09141	6.88644789962662e-10	Down
Rpl24	-1.09159	2.66536256614595e-09	Down
Perp	-1.09237	5.8801931414598e-07	Down
Dusp23	-1.09314	4.2085018595126e-07	Down
Tpbgl	-1.09373	0.0175933369274986	Down
Rpl36al	-1.09539	2.77299311154034e-08	Down
Rpl6l	-1.09577	0.00737836268579196	Down
Mal2	-1.09696	6.53026946702947e-05	Down
Dapk3	-1.09864	1.20532578072281e-06	Down
Mrpl17	-1.09949	1.03451852213008e-06	Down
Zfp324	-1.09966	0.0348662865075676	Down
Fbxo36	-1.10009	0.00811034437717534	Down
Ldha	-1.10484	6.65704200929408e-05	Down
Iba57	-1.10781	0.000520392010528048	Down
Gfm1	-1.10933	0.000622713760193451	Down
Pycrl	-1.10995	1.47168496653422e-06	Down
Ssr3	-1.11053	9.17566722551905e-07	Down
Mien1	-1.11112	9.36850959779415e-08	Down
Tmem243	-1.11162	4.80920072235353e-07	Down
Slc39a1-ps	-1.11169	0.0372998425319718	Down
Plin2	-1.11226	5.67477937271815e-08	Down
Dpm3	-1.11231	7.73151493341865e-06	Down
Ndufs5	-1.11264	4.66901514087537e-06	Down
Atp11a	-1.1128	7.86567626783942e-06	Down
Tbcb	-1.11318	6.5691393526917e-05	Down
U2af1	-1.11409	5.38571015288043e-11	Down
Glo1	-1.11424	1.28405241223287e-06	Down
C8g	-1.11583	5.37634058184832e-13	Down
Pin4	-1.11625	2.21646130550528e-06	Down
Nnmt	-1.11933	0.000199600662592333	Down
Il13ra1	-1.12016	0.000697350616303071	Down
Pomt2	-1.12021	0.000473123807741145	Down
Atf6b	-1.12037	5.65332795536236e-08	Down
Clic5	-1.12099	0.0379120144450352	Down
Nhp2	-1.12272	2.34982295798508e-05	Down
Mbl1	-1.1237	1.85994696925397e-08	Down
Hint1	-1.12483	9.85151768049549e-10	Down
Gng5	-1.12696	1.41016053382484e-08	Down
Rpl18a	-1.12759	1.96366026498751e-14	Down
Med22	-1.12786	0.000329831377194539	Down
Cox5b	-1.12852	8.7501872690399e-12	Down
Dhdds	-1.12864	1.86224402171154e-07	Down
Dad1	-1.12867	8.30783038379445e-07	Down
Gchfr	-1.12938	6.7612146730848e-06	Down
Cope	-1.13196	5.99223707034331e-12	Down
Gabarap	-1.13256	7.62211138876961e-08	Down
Mettl26	-1.13339	9.61396710668786e-06	Down
Tssc4	-1.13342	1.56472933964268e-05	Down
Tomm7	-1.13401	2.82375769244481e-06	Down
Eif2s3x	-1.13417	8.714489843759e-07	Down
Nucb2	-1.13562	0.000500508571776472	Down
Palld	-1.1359	1.4012582448742e-07	Down
Rps2	-1.13754	1.25259601866848e-09	Down
Il22ra1	-1.1399	0.000263858758555262	Down
Calu	-1.13997	2.78355415345356e-08	Down
Rpl27a	-1.14207	2.61992536554174e-10	Down
Hspe1	-1.14277	1.0893465183103e-11	Down
Rps6	-1.14402	3.66451208093271e-07	Down
Wdr89	-1.14454	0.0127970386264092	Down
Col15a1	-1.14475	0.00357658732109647	Down
Nans	-1.14563	1.98764787093566e-06	Down
Nop10	-1.14623	3.32307722291295e-05	Down
Mtln	-1.14944	0.000307636575022033	Down
Nat8f5	-1.14963	0.0468578835204951	Down
Edf1	-1.1534	2.35550917678666e-11	Down
Tufm	-1.15343	0.00171283451218495	Down
Prr16	-1.15459	0.00212288397765943	Down
Alpl	-1.15643	3.58505703286254e-07	Down
Rpl39	-1.15695	3.69561327080305e-09	Down
Rps16	-1.15713	3.15811990408638e-09	Down
Dtx4	-1.1595	1.69550870786498e-08	Down
Oard1	-1.16111	1.52721381262954e-05	Down
Alg2	-1.1617	8.65706788800735e-05	Down
Lhx6	-1.165	0.000610829327115194	Down
Cops9	-1.16793	5.85657296513848e-07	Down
Jpt2	-1.16983	3.5146550450739e-05	Down
Dohh	-1.1737	1.68458813485911e-05	Down
Il17re	-1.1741	0.0435410683007473	Down
Lman2	-1.17596	3.66566292860572e-09	Down
Ndufs6	-1.17617	1.8592755402767e-09	Down
Litaf	-1.17734	4.3970935227163e-07	Down
Insc	-1.17748	0.000775854119624814	Down
Tmem59	-1.18075	8.58951861608814e-09	Down
Chid1	-1.18589	5.87481589940112e-06	Down
B4galnt3	-1.18816	0.00137869818826722	Down
Them7	-1.18835	0.000725125594825583	Down
Abhd17c	-1.18877	6.67941075654094e-08	Down
Ttc36	-1.19193	1.00118492639058e-13	Down
Surf4	-1.19563	1.33969125825799e-08	Down
Ndufa13	-1.19576	1.15664235807857e-12	Down
Ltb4r1	-1.19657	0.00362869529964792	Down
Atp5mpl	-1.19714	3.98697358232355e-07	Down
Hsp90b1	-1.20318	9.29167149841502e-11	Down
Rpl39-ps	-1.2056	0.00887228445191363	Down
Mrpl49	-1.20587	1.36085789891074e-05	Down
Park7	-1.20653	4.64716424304745e-09	Down
B3galt6	-1.21231	0.0255377514257663	Down
Srd5a1	-1.21289	1.07328663390652e-09	Down
Suox	-1.21496	5.03812149301124e-05	Down
Rarres2	-1.21555	6.55223789808187e-06	Down
Inhbc	-1.21613	3.16459931511742e-06	Down
Mad1l1	-1.21653	1.0498034288305e-06	Down
Avpi1	-1.21662	7.38877957244058e-06	Down
Mrpl11	-1.21692	1.04244648291324e-05	Down
Erh	-1.21742	0.000143390085099663	Down
Agpat2	-1.22048	7.22038450069092e-12	Down
Ssr1	-1.22359	8.34235831549548e-12	Down
Gtf2f2	-1.22405	0.00127359397340252	Down
Serpina7	-1.22419	6.43941129131336e-08	Down
Cadm4	-1.22433	0.000464592458128825	Down
Cebpa	-1.22494	3.96772843665799e-09	Down
Cyp2d9	-1.22517	2.15891023388954e-05	Down
AW011738	-1.22556	0.0174982436342693	Down
Serpina12	-1.2259	0.00291221233408562	Down
TrnS2	-1.22746	0.0375336121945346	Down
Nme6	-1.2303	9.37771582487441e-06	Down
H13	-1.23032	6.84948157269054e-11	Down
Os9	-1.23173	1.58062623547006e-10	Down
H2bc21	-1.23208	0.00683459900981537	Down
Qsox1	-1.23264	2.74920154748927e-07	Down
Zfp593	-1.23288	0.0148738333599108	Down
Scfd2	-1.23458	0.000324292635928754	Down
Ndufa8	-1.23491	8.84494768340116e-13	Down
Cox6c2	-1.23631	0.00749452825468055	Down
St3gal1	-1.23743	2.23972990059211e-07	Down
Hspe1-rs1	-1.23862	6.44091649952066e-05	Down
Pcp4l1	-1.23919	2.81561942522035e-05	Down
Stt3a	-1.23937	2.55834234488285e-14	Down
Nsmce3	-1.23967	3.47627100494126e-06	Down
Rexo2	-1.2411	9.6875552060323e-10	Down
Rtl8a	-1.24234	0.00224800887903033	Down
Mydgf	-1.24283	3.76192493492782e-10	Down
Zswim5	-1.24313	0.0120961815871724	Down
Lsm2	-1.24371	0.000284530106025041	Down
Tmem176b	-1.24862	2.3573877344496e-06	Down
Ccl9	-1.25071	5.03907803763813e-06	Down
Atp5g1	-1.25233	3.10221674216832e-12	Down
Tmem238	-1.25332	6.07878812177431e-06	Down
Ap3s1	-1.25462	5.59383406578788e-05	Down
Ifitm2	-1.25792	5.17125527929464e-05	Down
Trappc2	-1.25855	0.0315123246384382	Down
Zbtb26	-1.26145	0.00775547450727671	Down
Naif1	-1.26234	0.0389785312655216	Down
Srm	-1.26287	3.50077736852609e-07	Down
TrnH	-1.26377	0.0293436693970158	Down
Bloc1s3	-1.26444	0.0079947492450672	Down
Atp5k-ps1	-1.26564	0.000613806128851396	Down
Spr	-1.26564	7.47704856829493e-08	Down
Dnph1	-1.26587	0.000125188604870524	Down
Crp	-1.26913	2.78308963559912e-05	Down
Fabp5	-1.26935	5.02571261054202e-06	Down
LOC114841036	-1.27016	0.015757194464398	Down
Hsp90aa1	-1.27039	1.75705884354045e-14	Down
C8b	-1.27058	3.65304363698515e-12	Down
Cyp2u1	-1.27356	1.0176318898983e-05	Down
Eef1akmt4	-1.27632	0.00294184099240709	Down
Kdelr1	-1.27809	1.04309727676241e-08	Down
Them6	-1.27845	0.00180366623687253	Down
Hsph1	-1.28054	0.000138548964481647	Down
Rps27a-ps3	-1.28174	3.13125978986274e-06	Down
Tmem176a	-1.28551	7.98167343888329e-07	Down
Arcn1	-1.28669	3.83274338134598e-11	Down
Ugt3a2	-1.28711	1.36544924881816e-07	Down
F8a	-1.2879	0.00424087781973159	Down
Vtn	-1.28935	1.25326086832692e-09	Down
Snd1	-1.29031	1.71422057300741e-11	Down
Romo1	-1.29277	4.51903543319711e-09	Down
Trmt61a	-1.2958	0.00247429139822803	Down
Wfdc2	-1.29585	0.00819180822319901	Down
Uggt1	-1.29941	1.99799997159111e-12	Down
Tuba4a	-1.29959	6.54804418218218e-11	Down
Rad51c	-1.29999	0.0305774702134628	Down
Hectd2	-1.30027	0.000959027921674938	Down
Cldn3	-1.30088	1.36087165408995e-07	Down
Cox8a	-1.30277	9.39380121409177e-10	Down
Rps23	-1.30358	2.60560397113978e-08	Down
Polr2i	-1.30402	3.05802952942946e-06	Down
Lsm6	-1.30463	6.04007806162706e-11	Down
Lmod1	-1.30502	0.0181323930436802	Down
Sec13	-1.30538	4.08993980366806e-06	Down
Sec61g	-1.3096	4.37316764607418e-12	Down
Pdgfc	-1.31446	0.0119341735217669	Down
Serpina1c	-1.3184	1.2915918864596e-10	Down
Rpl21-ps15	-1.32183	0.0129234240952768	Down
Nat8f2	-1.32595	5.55299835191375e-09	Down
P4hb	-1.32613	1.68914457116884e-13	Down
Hsd3b3	-1.3271	7.45955242711361e-09	Down
Dnajb9	-1.3276	3.76743400268098e-05	Down
Rpl17-ps10	-1.3292	0.00468491435597836	Down
Cfd	-1.33436	0.0330762862684629	Down
Mup18	-1.33547	0.00696482352900647	Down
Pde12	-1.33592	0.000491401256617021	Down
Nme1	-1.34209	1.91985135824886e-09	Down
Pid1	-1.34236	3.6512352489836e-08	Down
Morf4l2	-1.34353	4.26195107465462e-12	Down
Insig2	-1.34371	1.88378610546322e-14	Down
Ssr2	-1.34686	2.24922418608381e-09	Down
Ostc	-1.34903	5.94277634286627e-07	Down
Cyp2c67	-1.3518	5.04158726490816e-08	Down
Nme2	-1.35282	5.40796334999989e-14	Down
Egfr	-1.35299	9.50339872290693e-18	Down
Fam47e	-1.35302	9.66488618317912e-08	Down
Ubfd1	-1.35912	2.46633251299252e-10	Down
Bysl	-1.36137	1.89104045123797e-06	Down
Vkorc1	-1.36336	5.20756328890119e-07	Down
Nop16	-1.36679	1.00444395170075e-07	Down
Mrpl34	-1.37057	2.54151011543508e-06	Down
Tubb2a	-1.37194	2.741183483635e-11	Down
Slc9a3r1	-1.37387	8.22230481762514e-08	Down
Prdx5	-1.38002	1.31815815534086e-12	Down
Bloc1s1	-1.3841	8.00019787436426e-07	Down
Coa3	-1.38521	2.47546403139345e-09	Down
Polr2l	-1.3867	8.9070826362716e-08	Down
Exosc9	-1.38739	0.0141190297705311	Down
Inhbe	-1.39207	3.20674390438692e-05	Down
Tmed2	-1.39268	2.08924602834157e-10	Down
Spcs2	-1.39578	4.07278110151777e-09	Down
Plppr1	-1.39637	0.027975647106881	Down
Mup19	-1.40044	0.00393261847272642	Down
Ces4a	-1.40357	0.0329878438599657	Down
Hspb8	-1.40516	7.54548475984242e-12	Down
Calr	-1.40722	1.1954818608486e-24	Down
Pnkd	-1.40929	1.02345665260056e-10	Down
Ddost	-1.41302	1.52461255925248e-18	Down
Smco4	-1.41317	2.73449631122187e-07	Down
Alg12	-1.41517	1.53212232820298e-06	Down
Pdia6	-1.41562	7.87272908340837e-10	Down
Zfp9	-1.41858	0.00604372070051681	Down
Arf4	-1.42319	6.32756757628892e-11	Down
Tomm6	-1.42514	8.88126632207136e-10	Down
Dhrs9	-1.42727	0.00707778954757894	Down
Steap3	-1.43408	1.1045602327838e-08	Down
Spcs3	-1.43466	9.36177928226079e-09	Down
Gale	-1.44153	8.49096403483163e-07	Down
Cnbd2	-1.44721	0.0103202048401135	Down
Trhde	-1.44852	0.0449178494724484	Down
Slc16a1	-1.44901	3.5071775069013e-08	Down
Atp2b2	-1.45518	9.9789606763214e-05	Down
Gltpd2	-1.45712	4.40906072034687e-10	Down
Atp2a2	-1.45868	3.88998807322028e-17	Down
Mmgt1	-1.46016	3.28990080239929e-05	Down
Cox6a1	-1.46113	8.40855199447842e-10	Down
Ppp1r3c	-1.46318	4.35515416581402e-09	Down
Fgb	-1.46591	2.07556826035087e-07	Down
Lad1	-1.46604	0.000370328988740821	Down
Wdr83os	-1.46729	1.14055161379125e-07	Down
Ndufa4	-1.47452	5.76550403648505e-10	Down
Vmo1	-1.47592	0.00135398929571056	Down
Sfrp1	-1.47836	0.0494429235812268	Down
Krtcap2	-1.48588	9.35553313979888e-14	Down
Ppib	-1.48667	0.000199976593066107	Down
Hao1	-1.49802	7.00888404679276e-20	Down
Ang	-1.4998	1.30946284846336e-10	Down
Psmb5	-1.50632	1.6215149195672e-10	Down
Cox16	-1.50741	0.0124806209851867	Down
Sdr9c7	-1.50937	2.44213008003388e-07	Down
Tmem258	-1.51236	1.52708291131765e-13	Down
Snrpf	-1.51376	0.0384978679599508	Down
Tmem37	-1.51946	5.91248881941848e-08	Down
Tfg	-1.52036	2.25882010547097e-08	Down
Mup3	-1.52274	1.95293193089126e-07	Down
Steap4	-1.523	0.00697740569653591	Down
Mrpl20	-1.5248	3.52278883083316e-06	Down
Sec23b	-1.53925	4.64281293391723e-10	Down
Ero1b	-1.55683	3.22142169669549e-10	Down
Hdhd3	-1.55992	3.56447933877632e-11	Down
Slc35b1	-1.5634	3.11716356209888e-12	Down
H4c8	-1.56979	0.0167884755402211	Down
Pdia3	-1.5723	2.7303828916525e-15	Down
Nek6	-1.57344	2.28317593674874e-15	Down
Lcn12	-1.57544	0.00714911849589884	Down
Saa4	-1.57823	0.00427021864615019	Down
Cdh1	-1.58499	6.83728545735279e-17	Down
Gfpt1	-1.58865	6.19071746724658e-09	Down
Chchd10	-1.59538	4.03164112880871e-10	Down
Tmem267	-1.59834	0.00681046469392881	Down
Fkbp4	-1.59882	1.16518509664353e-22	Down
Sod1	-1.60038	8.77055012701692e-11	Down
Enho	-1.60437	1.06980087713263e-09	Down
Mlycd	-1.60801	1.04974613773569e-06	Down
Atp4a	-1.61351	0.00641754622815023	Down
Tubb4b	-1.61399	6.54058001541869e-12	Down
Sec61b	-1.61673	6.63184312385016e-09	Down
Fam187b	-1.61738	5.09096699481387e-06	Down
Rnaseh2c	-1.61816	4.11364078428746e-11	Down
Mical2	-1.61922	5.14575614301941e-08	Down
Fga	-1.62209	0.00389431369808015	Down
Rpn1	-1.62659	6.7277300184982e-18	Down
Ost4	-1.62937	9.66431307908861e-07	Down
Hspa13	-1.6353	4.21727684680084e-10	Down
Dnajb11	-1.63894	3.47929602153879e-14	Down
Tnfrsf12a	-1.6423	0.0262135277234036	Down
Stip1	-1.64934	8.07241809020198e-17	Down
Orm1	-1.65101	3.71539062088115e-11	Down
Lrrc59	-1.65122	4.36338582741956e-12	Down
Tuba1c	-1.65377	3.61389987948912e-13	Down
Fam222a	-1.65459	1.65235371879493e-06	Down
Pllp	-1.65767	1.32998265162537e-07	Down
Cnn1	-1.66452	0.0499616888606127	Down
Rrp12	-1.66852	6.62830315710308e-05	Down
Slc41a2	-1.67408	4.21523074859176e-08	Down
Cdk2ap2	-1.67465	2.73912046919038e-17	Down
Sec61a1	-1.67495	6.96736169161482e-13	Down
Cry1	-1.67963	2.70069446214016e-07	Down
Dnajc12	-1.6836	7.19594640935839e-07	Down
Hp	-1.69208	5.1845787584953e-09	Down
Cyp2d40	-1.70064	4.06015453384103e-17	Down
Nat8	-1.7039	0.000428500496283237	Down
Serpina3k	-1.70445	2.45814067482452e-17	Down
Cyp7b1	-1.73023	2.27544443187481e-06	Down
Srprb	-1.74076	8.0229161723257e-13	Down
Gstp1	-1.74366	1.989342977047e-09	Down
Pdia4	-1.74405	3.0678051970364e-21	Down
Cyp2s1	-1.75047	0.0265821784538905	Down
Spsb4	-1.75332	0.000384431094431905	Down
Hapln4	-1.75893	6.12381592182924e-07	Down
Tmed3	-1.75937	1.49880940957607e-08	Down
Arfgap3	-1.75942	7.30864387568986e-07	Down
Tmed9	-1.76604	1.97044168178868e-23	Down
Ppard	-1.77963	0.00487372864024752	Down
Ly6d	-1.78124	0.00222603450002785	Down
Rbx1-ps	-1.79061	0.0020087057129629	Down
Ndufs6b	-1.7957	0.00324460497165596	Down
Zmat5	-1.82746	0.0196169049524444	Down
Serpina3c	-1.83181	0.005710442105024	Down
C9	-1.84321	9.14855927741547e-22	Down
Lrfn3	-1.85561	1.07344875830221e-07	Down
Frat2	-1.86261	0.00296926107589384	Down
Muc3a	-1.90787	0.00926582218189644	Down
Ndufa1	-1.90794	7.72689303205721e-10	Down
Chrm3	-1.93001	6.45190360941651e-08	Down
Hsp25-ps1	-1.95037	1.90181774503918e-10	Down
Hyou1	-1.96561	1.25712228940576e-25	Down
Ung	-2.01006	3.13139878389754e-08	Down
Mup16	-2.04115	0.00541872299206308	Down
Capn8	-2.04256	0.0121762423462889	Down
B4galnt2	-2.09192	0.00417621978112076	Down
Sebox	-2.10739	0.0151386149231545	Down
Mid1-ps1	-2.10767	0.00020730969856166	Down
Krt19	-2.10868	0.000854544615930034	Down
Ttbk1	-2.12518	2.17444653822079e-05	Down
Rpsa-ps2	-2.12838	0.0182176388530291	Down
Mup11	-2.13996	0.00971918022064125	Down
Syvn1	-2.15874	5.37543928893804e-12	Down
Gstp2	-2.20163	1.5951179914847e-11	Down
Slc22a7	-2.22704	4.27667493007408e-16	Down
Mup20	-2.23222	1.15550896597889e-23	Down
Loxl4	-2.23383	5.03050215580399e-08	Down
Lrg1	-2.2825	0.00212642116625141	Down
Mup21	-2.28411	2.84091065052202e-05	Down
Gstp-ps	-2.3034	0.0027864133104504	Down
Hspa5	-2.3239	5.82449430700892e-20	Down
Ugt2b38	-2.3414	4.36902179134635e-06	Down
Creld2	-2.34195	9.74559559817188e-16	Down
Mir3098	-2.3464	0.003343604404759	Down
Orm2	-2.38883	0.00573457116767249	Down
Manf	-2.54005	1.09133203509258e-26	Down
Derl3	-2.58353	1.53411417888902e-14	Down
Saa2	-2.61355	0.0237622736167595	Down
Mup-ps1	-2.72308	0.0267396182579153	Down
Elovl3	-2.7273	0.00728455019982439	Down
Mup17	-2.74535	0.00794003433701158	Down
Mup14	-2.7597	9.88241434873792e-06	Down
Hamp	-2.85471	2.97592504682486e-05	Down
Hspb1	-2.88115	4.04337171967179e-33	Down
Npas2	-3.06676	1.34720184434031e-09	Down
Sdf2l1	-3.11219	1.52618702693851e-26	Down
Saa1	-3.13735	0.00438504196039083	Down

## Sheet: Table S1-lung
geneID	log2(fold change)	p-value	Regulation
Mb	6.42123290774463	4.07382383062883e-05	Up
Npy	5.92652007024015	5.59442632296341e-05	Up
Tmem130	5.92179762698715	0.000397523706629857	Up
Grm1	5.37158233457759	0.000828798114886955	Up
Pcdhga7	5.26785481979425	0.00530959144353066	Up
Sbk3	5.18612766668331	0.000256985238898677	Up
Trdn	5.15715834675078	2.09368278324801e-05	Up
Tmem182	5.10121423165436	0.000328877253346908	Up
Trim55	5.07817983022514	1.18086849464796e-05	Up
Klhl31	5.04232837105947	0.000310713489745798	Up
Syt3	5.03007818529243	0.00290201151734959	Up
Pirt	5.01642690157424	0.00125619315330895	Up
Yipf7	4.97279588484583	0.00119271536607371	Up
Gipr	4.96443931779901	0.00364887247963006	Up
Asb10	4.89802111925809	0.000420299195403312	Up
Mlana	4.87523275982675	0.000652649598805338	Up
Myh8	4.86267598906518	0.00021344686712878	Up
Slc38a3	4.84494107072131	0.00155798049301051	Up
Trim54	4.83837477064963	0.00104846621471431	Up
Comp	4.75093370771182	5.25817817854732e-05	Up
Hand2os1	4.65287011897603	0.000159194892183668	Up
Cartpt	4.60979103907519	0.00140916126356508	Up
Gata4	4.60247995531949	0.00191728027971968	Up
Kcnj5	4.58505367999279	0.0017995337173679	Up
Vsig4	4.58296227511175	0.00762460404376463	Up
Hjv	4.57991039467667	0.000499859632374317	Up
Nefl	4.57076776078196	0.0391223646514433	Up
Lrrc10	4.5227235523113	0.0136606889942165	Up
Cox6a2	4.45290813534054	0.00285230863770083	Up
Lmod2	4.43753196939818	0.00116640802129931	Up
Rgs7	4.42944969867283	0.00592889104398325	Up
Smtnl1	4.42777968096537	0.00483417481197669	Up
Dbh	4.38476638593887	0.0235015582964216	Up
Tcap	4.16460759401103	0.00183348598596516	Up
Twist1	4.15397799949382	0.0305403054550644	Up
Mt3	4.14416953083692	0.00339680350598977	Up
Synpo2l	4.12979271496221	0.00303427872300875	Up
Ckm	4.12764494500544	0.000287357897732693	Up
Ahsg	4.10113317408012	0.00480383261953804	Up
Asb11	4.08922994157452	0.00492419144368405	Up
Mhrt	4.08235966518414	0.00331898755525792	Up
Lcor	4.07138022383413	0.0115767870361534	Up
Cdkn2a	4.06684238481503	0.0406571058649788	Up
Gpr37	4.03997480002577	0.0235180046809626	Up
Smyd1	3.96458316601004	0.00323665015550915	Up
Tenm2	3.9618771225155	0.00554994874011317	Up
Syt1	3.90098780233169	0.000467754241531592	Up
Ctnna3	3.89779277507074	0.0149603831000973	Up
Pdzrn4	3.87195212924016	0.0262441257565893	Up
Clcn1	3.86028950076719	0.0436496343815527	Up
Pvalb	3.85617757319221	0.0141693581469198	Up
Cmya5	3.85550092399105	0.00473401193234553	Up
Ngf	3.85084851035891	0.0463902134941335	Up
Atcayos	3.82225813385421	0.00435013717875461	Up
Hamp	3.73572561118954	0.0076910866222172	Up
Hcn1	3.71860732466534	0.0327416592164006	Up
Rgs5	3.71815330317363	0.00145341791250235	Up
Igsf1	3.71528986627278	0.0227262988842823	Up
Platr32	3.68409136776828	0.00382839820961883	Up
Lcmt2	3.65421304190465	0.0175839894359258	Up
Acta1	3.63710540038696	0.00106512433765554	Up
Fbxo40	3.62534484565852	0.00121978578460898	Up
Rnf207	3.59175035596508	0.00506483949702509	Up
Camk1g	3.55982690496233	0.0386316159292632	Up
Rnu5g	3.54798503098686	0.0413190134930772	Up
Krt222	3.5472363514945	0.0440867884754702	Up
Vat1l	3.52139336755552	0.0142773935744382	Up
Apoa1	3.52088230119475	0.0166939384366658	Up
Cxcl5	3.51251175005911	0.0234588783726656	Up
Kcna1	3.50359599610243	0.0412806663579523	Up
Stmn3	3.50316675541063	0.00172588260518887	Up
Slc47a1	3.50265645152692	0.000697997855802619	Up
Trim72	3.47945703697555	0.00482684079380103	Up
Tbx18	3.46280969489254	0.0023312055007953	Up
Fndc5	3.3957024472605	0.0137127365853485	Up
Ldb3	3.35198963487936	0.0242627994243683	Up
Snap91	3.32257629959349	0.0422419278580293	Up
Fhod3	3.32167532773605	0.0213457280140601	Up
Cd207	3.31626239505686	0.0170248574286269	Up
Ntm	3.28304616999617	0.00283384641675455	Up
Aqp7	3.27346219943185	0.00838021970388952	Up
Tubb3	3.25583515741398	0.00171490936786337	Up
Htr3a	3.21716501828469	0.0177921048983865	Up
Klhl30	3.20778859521289	0.0115993369284538	Up
Tcf15	3.16128444557791	0.0144791304165511	Up
Ryr2	3.1413365300433	0.0266410751334335	Up
Sult4a1	3.12672712244211	0.00554846253596159	Up
mt-Rnr1	3.08119653805067	0.0218654136121459	Up
Rasl10b	3.07877272954029	0.0148690359316115	Up
Mir6236	3.06351118757516	0.0128551916191951	Up
Ntsr2	3.05140220165397	0.044132287045714	Up
Camk2a	3.04569166498631	0.00170250940126041	Up
Kcnj11	3.03876847086209	0.00471108311208932	Up
Cidea	3.0375628169284	0.0161118471532044	Up
Mylk4	3.00697436734411	0.00307647968316267	Up
Osbp2	2.98999304626954	0.026380893210489	Up
Myl3	2.97814935903721	0.00773103819319261	Up
Inpp5j	2.94105987997793	0.00738200767785066	Up
Mapk10	2.91924276398766	0.0381797069500009	Up
Abca9	2.90093568569326	0.0364870556549029	Up
Prph	2.87969783162222	0.00738122851252377	Up
Frmd5	2.84491939768112	0.0202288245555377	Up
Pygm	2.83956497309492	0.00158637597517088	Up
Coro6	2.82736392770667	0.0353628918418823	Up
Sdsl	2.82672474111199	0.0366190216039379	Up
Nrtn	2.80270377908985	0.0276943313411208	Up
Apobec2	2.7849556015958	0.037063458959591	Up
Ank2	2.78196313933896	0.0142745280920813	Up
mt-Rnr2	2.76034709237152	0.0128819370095943	Up
Ebf3	2.75447502339419	0.0485053127725618	Up
Aldh1b1	2.7254990874188	0.0198395794691363	Up
Klhl41	2.72120995931897	0.0447048575286159	Up
C1qtnf9	2.71304801675498	0.0153440673141474	Up
Ndrg4	2.71069149907975	0.0233115629757376	Up
Paqr9	2.69360163967134	0.0202004729334272	Up
Ngfr	2.69345062895313	0.0145274145282656	Up
Csdc2	2.69211546704011	0.0402597497280766	Up
Pck1	2.67239261685814	0.0452349268638524	Up
Atp6-ps	2.64172682666581	0.0486555056917271	Up
Sox9	2.64016947471048	0.00144483537759745	Up
Grip2	2.63370759520935	6.57674859041592e-05	Up
Cacna1h	2.61831038957332	0.0253494512565656	Up
mt-Co1	2.61797879475195	0.026831990824823	Up
Snap25	2.58259336716113	0.0314688094246609	Up
Cpne5	2.58041052558211	0.0315318473501308	Up
Ppargc1b	2.57343111843337	0.0190737074552186	Up
Btnl9	2.56762818183951	0.0121598877023135	Up
Rcan2	2.54636583167315	0.0152565612392562	Up
Adamts7	2.53944167312244	0.0223143173839441	Up
Ephx2	2.53629222772451	0.0410095884495816	Up
Dsc2	2.53099264796487	0.02719427479368	Up
Cav3	2.52374551180041	0.0377651839307967	Up
Mtus2	2.52238239781385	0.0457089266518857	Up
Usp13	2.49523844593824	0.0284359639145387	Up
Sfrp5	2.49064830382619	0.032277628437512	Up
Rrad	2.45371428127768	0.0198036616465748	Up
Tnnt1	2.4249851041249	0.0388124073181782	Up
Cracd	2.42202695859592	0.0317875016588986	Up
Coq8a	2.42181902660029	0.0480064612527857	Up
Rab3c	2.41964046853165	0.00109461248292343	Up
Kcnip2	2.41058822952581	0.0338550132595504	Up
Cdh2	2.40570132994566	0.00729818053140041	Up
Twist2	2.40557385485519	0.0334500855050645	Up
mt-Cytb	2.40222153880471	0.0337769431237417	Up
BB365896	2.3609519473199	0.0424150770432314	Up
Extl1	2.35629865216686	0.0283663066871936	Up
Cacna1g	2.3558980164863	0.0209408055904466	Up
mt-Nd1	2.34833808607113	0.0261310689219807	Up
Rufy4	2.33827910023782	0.0449162342632287	Up
Carns1	2.32107688399468	0.0420203746522038	Up
Mettl23	2.31278494710955	0.0452586291248927	Up
Sv2a	2.31068049406556	0.0461987795505879	Up
Tmem108	2.29078123690347	0.0232681315201324	Up
Vit	2.27940789558406	0.0228677806185663	Up
Eif3j2	2.25754345667084	0.010562007594089	Up
Mypn	2.22354517239322	0.0290761581267996	Up
Scd4	2.19706389961344	0.0492158587681647	Up
Kcna6	2.1900498464237	0.03096512345701	Up
Cngb1	2.17922835328079	0.00745783647739043	Up
Adcy1	2.17486953775499	0.0479183302838465	Up
Ncam1	2.14646147925158	0.00212746262960348	Up
BE692007	2.14590603496021	0.041966945390265	Up
Sh3bgr	2.14496384358993	0.00576713622908993	Up
Akap6	2.1309381576265	0.0115460775364331	Up
mt-Nd5	2.12915617796681	0.0410481465814197	Up
mt-Tp	2.12369671056666	0.0363540876776262	Up
mt-Nd4	2.11536223024156	0.0413900358734317	Up
mt-Nd6	2.09233979294689	0.0293221733847809	Up
Rbm24	2.04077399627994	0.0344745818494157	Up
Dio2	2.02818613271706	0.0345665396376909	Up
Ablim2	1.98769134953317	0.0168035278136157	Up
Rgs6	1.9711449958728	0.00635928111334413	Up
Sost	1.94472696721328	0.0158932291151183	Up
Sgcg	1.93737954474591	0.0245097967027431	Up
Kcnh2	1.89491440317277	0.0412074880115505	Up
Rgs4	1.85372965960145	0.0231156437173716	Up
Rpl18a-ps1	1.81155382258634	0.0195981314470667	Up
Cxcl13	1.8099725515794	0.0461542952055114	Up
Dkk3	1.80854146251608	0.0019308101064256	Up
Klhl33	1.8033324315556	0.0381808556463351	Up
Smpd3	1.79755034375955	0.00740812323156239	Up
Col15a1	1.78961421517272	0.0445889010380607	Up
Fsd2	1.78784359663771	0.0396534718801528	Up
Ndn	1.76617430362499	0.0417416816143311	Up
Atp5me	1.7641119575065	0.0318701413371984	Up
Cox5b-ps	1.76298482443088	0.0463060015457539	Up
Ctnnbip1	1.74706365686008	0.0172879754481037	Up
Atp5l2-ps	1.72903143429049	0.0467301327949661	Up
Prune2	1.72692312539523	0.0491265478606061	Up
Plp1	1.70709986154401	0.00326114048315893	Up
Uqcr11	1.68995327868369	0.00220266952184523	Up
Mcrip2	1.68733108747822	0.0368381430604449	Up
Ptn	1.63085616548087	0.0385393438417233	Up
Meox1	1.62621936649828	0.0187372427657411	Up
S100b	1.6223858729673	0.046424899090028	Up
Fam124a	1.57223091370836	0.00482640041461401	Up
Fxyd1	1.56895707376643	0.0432535099246879	Up
Tagln	1.52157449320368	0.0227297179455527	Up
Ndufb7	1.4284325725596	0.0101826644340144	Up
Upf2	1.40518277738448	0.00304443975033024	Up
Pdlim4	1.39164212348461	0.0261170564980589	Up
Nos3	1.37745340284653	0.0111364880808329	Up
Gapdh	1.37364632038737	0.02166923583095	Up
Hspg2	1.36143172118613	0.0143875862621112	Up
Atp5f1d	1.3469520387651	0.0131981499035774	Up
Fscn1	1.34064484551943	0.00936982515286021	Up
Tg	1.30567372418043	0.00874979716898339	Up
Palm	1.29955769893394	0.0292380058417829	Up
Sorbs1	1.28598450653673	0.0268995545633661	Up
Tshz2	1.25154121672553	0.027236380820007	Up
Ndufa13	1.22901346633499	0.0331164608839198	Up
Trim47	1.22679604709383	0.0338737635542822	Up
Peg3	1.19933915843628	0.039500469339102	Up
Car3	1.19717323421659	0.0417677743159514	Up
Cox5b	1.17477123160029	0.0345680681830899	Up
Ammecr1	1.17036518236504	0.0290614796203049	Up
Ndufv2	1.16411596150009	0.019071778219616	Up
Pelp1	1.16131846956191	0.0304904093164434	Up
Atp5mf	1.14559233815471	0.0297454178952795	Up
Dpysl3	1.12627243212236	0.0246955397273446	Up
ENSMUSG00000121783	1.11727779798561	0.0355238405685778	Up
Reg3g	1.10625247685261	0.0261725602570265	Up
Fbln1	1.09016366423018	0.0405719072876881	Up
Rps27a-ps3	1.08085420918969	0.0309924017588662	Up
Ndufs2	1.03657016248919	0.0473743777180875	Up
Dleu2	1.01269144525455	0.0209073782804957	Up
Calml3	1.01218184173354	0.0393698489775131	Up
Perm1	1.88115	0.0311730254677024	Up
Nr2c2	1.06143	0.0249203527115953	Up
Klf4	-1.01562	0.049334890844934	Down
Cemip2	-1.02257	0.0459854070854329	Down
Abhd2	-1.02979	0.0462921338446793	Down
Plvap	-1.04431	0.0491127995253656	Down
Ctsh	-1.05276	0.0479550388036991	Down
Slc22a23	-1.05346	0.0457856854444607	Down
Sh2d3c	-1.05614	0.0469791695300325	Down
Gprc5a	-1.06138	0.034802294043653	Down
Cebpd	-1.07039	0.0190453771780224	Down
Slc43a3	-1.0773	0.0164403100718385	Down
Fzd4	-1.07751	0.0409901611322814	Down
Cyp2b10	-1.0782	0.0494238798511586	Down
Lamp3	-1.08054	0.0408638072397362	Down
Pdgfra	-1.0823	0.0359593182440007	Down
Csrnp1	-1.08406	0.0497353313459472	Down
Kit	-1.08418	0.0492071352561389	Down
Cxcr4	-1.1013	0.0497904271012277	Down
Ramp2	-1.10375	0.0379202796596501	Down
Arap2	-1.11042	0.0433662388705861	Down
Lpcat1	-1.12854	0.0400725687392981	Down
Hilpda	-1.13705	0.0336385917001292	Down
Hc	-1.15043	0.0329982455807121	Down
Lcn2	-1.15256	0.0479119141775708	Down
Btg2	-1.15746	0.0296041827863135	Down
Traf3ip1	-1.17539	0.0441384462430701	Down
S1pr1	-1.17664	0.0217094085784019	Down
Ctss	-1.19001	0.0304360699695343	Down
Abca3	-1.19798	0.0376373610455761	Down
Rtkn2	-1.20367	0.028035186489787	Down
Clec14a	-1.21249	0.0239873932632142	Down
Rasl11a	-1.21576	0.0387164970652139	Down
Acer2	-1.2244	0.0179333051606583	Down
Lbr	-1.23312	0.0380403450377604	Down
Napsa	-1.23416	0.0201497157800011	Down
Cpm	-1.25295	0.0349911278129599	Down
Leng8	-1.25614	0.0412524639995657	Down
Itga4	-1.25752	0.0362024251947193	Down
Zfp697	-1.25815	0.0434585734670204	Down
Sema3g	-1.27052	0.0123704342312759	Down
Spn	-1.28429	0.0354992640231928	Down
Lpin2	-1.28491	0.0258956298343829	Down
Bmp6	-1.29446	0.0133509027209416	Down
Klf2	-1.29724	0.020360324860109	Down
Per1	-1.29949	0.014936204393799	Down
Tspan7	-1.30862	0.0218060836945613	Down
Efnb2	-1.30931	0.0118497391584002	Down
Esm1	-1.31687	0.0489454218350214	Down
Cldn18	-1.32101	0.0214617933605571	Down
Slc6a2	-1.32447	0.0254959088843262	Down
Zfp641	-1.32841	0.0241507199191276	Down
Foxf1	-1.33511	0.00691052025841119	Down
Cldn5	-1.33783	0.012128035465569	Down
Adamts1	-1.33817	0.0119571889693254	Down
Tspan8	-1.34991	0.00855077432758221	Down
Dennd3	-1.3655	0.00940653963741829	Down
C7	-1.37482	0.0164711423427917	Down
H2-Q5	-1.39075	0.0355569770463716	Down
Col4a4	-1.39394	0.00902533265347367	Down
Lyz1	-1.41057	0.00762342982382008	Down
Dhcr24	-1.44507	0.0136667968344114	Down
Dpp4	-1.45754	0.00694258367817897	Down
Slc16a9	-1.46261	0.0106108040435585	Down
Slc34a2	-1.4631	0.0171454313256909	Down
Calcrl	-1.47376	0.00690696558911819	Down
Col4a3	-1.4749	0.00981577218105218	Down
Lyz2	-1.49477	0.016872603279436	Down
Bex4	-1.50804	0.0137090235340048	Down
Ager	-1.5766	0.0199564812618674	Down
Lama3	-1.61054	0.0299819088162011	Down
Sftpc	-1.61683	0.0302161355272476	Down
Fendrr	-1.62963	0.00662474121258303	Down
Slc22a15	-1.65845	0.00476205440489059	Down
Ccn1	-1.69776	0.0266634739788646	Down
Fos	-1.70188	0.0379632966952154	Down
Errfi1	-1.70537	0.00171046871242798	Down
Ace	-1.72196	0.0403041954196095	Down
Dusp1	-1.72764	0.00274220199002104	Down
Sla	-1.77805	0.00703562742358631	Down
Chil3	-1.90676	0.000719968274354236	Down
Sell	-1.96454	0.011650290666903	Down
H2-T24	-1.98548	0.00548525971824551	Down
Ifi213	-2.0065	0.0263437508925037	Down
Cd8a	-2.01663	0.0469360279393048	Down
Prkg2	-2.12539	0.00585398648523142	Down
Baiap3	-2.1792	0.0330803016391624	Down
Ccpg1	-2.21378	0.0361122380903784	Down
H2-Q7	-2.21655	0.00410440807877817	Down
Gzma	-2.28958	0.00117807398807964	Down
Slfn1	-2.38663	0.0295829244510383	Down
Slfn4	-3.28077	0.0154896876182066	Down

## Sheet: Table S1-spleen
geneID	log2(fold change)	p-value	Regulation
Hba-x	5.58553016395521	3.87354960109704e-05	Up
Rnf212	5.57923789860171	4.42107014203552e-10	Up
Redrum	4.98664797399062	1.969746785784e-21	Up
H2ac10	4.98142253847447	6.72178603457233e-17	Up
Lincred1	4.95578620982083	2.15649478199253e-08	Up
Samd11	4.90600518283188	4.85437871736535e-14	Up
Btn1a1	4.82936971498857	1.03282594507955e-05	Up
Ermap	4.62648403180611	1.33893768561984e-12	Up
Hbq1b	4.58754666766857	1.4160982232694e-13	Up
LOC118567921	4.56756642004279	1.03001817722684e-08	Up
Pheta2	4.51071381552648	1.002050321084e-13	Up
Btnl10	4.49645486400469	1.56054517939963e-10	Up
Apol10a	4.49240872323854	1.4685955907434e-06	Up
Klf1	4.48524850059336	1.63064718710481e-13	Up
Epb42	4.43625882779156	2.38486749660452e-10	Up
Gfi1b	4.42631449092604	3.6128711920248e-14	Up
Fer1l6	4.41031205107357	0.000521619996736834	Up
Rhag	4.4079333213708	0.000105486409644249	Up
Pkhd1l1	4.35228081264973	2.8090202085852e-11	Up
Apol8	4.3350117695959	6.94757196198810e-12	Up
Aldh1a7	4.28419718015611	7.35844426355082e-06	Up
Ctse	4.25975346937626	8.8280188182275e-10	Up
Pklr	4.25130538010991	2.09711800132952e-14	Up
BC021767	4.2299251136152	2.99834965441226e-06	Up
Cdc25c	4.21255439868198	5.93521931204627e-09	Up
Sh3tc2	4.20869101636148	2.58253733571578e-15	Up
Trim10	4.19183989023957	1.28455389750166e-09	Up
Hemgn	4.17629626666032	3.67132230958905e-12	Up
Gata1	4.17030532906712	4.52057202817966e-17	Up
Mroh6	4.1636033753157	1.60320568770402e-06	Up
H4c6	4.14586433960199	1.60302136446698e-05	Up
Pnp2	4.13807708042733	1.70971258145948e-14	Up
Hspe1-ps5	4.12778715584773	1.32985753410517e-06	Up
Aknad1	4.12695818673876	3.41116344072422e-06	Up
Spta1	4.1074850247693	0.00024623841113637	Up
Icam4	4.08822246258683	2.5592579951836e-11	Up
Slc25a21	4.08325001564481	3.38268577725638e-10	Up
Gypa	4.07938318252057	2.04965392571542e-10	Up
Slc38a5	4.02865234384015	2.7691592719701e-12	Up
Cldn13	3.9890181092412	3.60462184528188e-11	Up
Hmbs	3.98313366851447	1.20600811202094e-12	Up
H1f1	3.97923256617247	1.30669038065705e-05	Up
Rhd	3.97392104605275	9.71849422194996e-09	Up
Pdia2	3.97299978360652	3.80956292549632e-10	Up
Kel	3.93553767645744	0.000167888451075663	Up
Aqp1	3.91471896246869	2.79252020990364e-13	Up
Mageb16-ps2	3.88852956041414	0.000129021918335386	Up
LOC118567351	3.87774467272217	5.09832288913986e-05	Up
H1f5	3.85535260070355	1.75878854164805e-06	Up
Trim58	3.84442817428606	4.19022201741261e-08	Up
Stil	3.84310901705747	2.33142746015207e-15	Up
Slc16a10	3.82994721817081	3.27699080679948e-11	Up
Rrm2	3.81988571676077	6.15689202920629e-15	Up
Tfrc	3.81733200518949	4.49542999475727e-13	Up
Ahsp	3.81504820977146	1.44181744335077e-09	Up
Macroh2a3	3.81368590444568	0.000695893618000311	Up
Tal1	3.80933124180014	3.54762456326832e-11	Up
Car1	3.80708268182512	2.43356493785996e-11	Up
Tspan8	3.80379173483107	1.78286403187618e-08	Up
E2f8	3.80082491757834	1.47609726846288e-13	Up
Rbm44	3.79145308421104	0.000800092045799067	Up
Slc2a4	3.78431257658287	9.41712981123401e-09	Up
Tspo2	3.78249335112116	2.66511003977517e-09	Up
Il1rl1	3.77194548649099	1.97270164588757e-14	Up
LOC118567338	3.7669209299318	1.51770783551049e-10	Up
Depdc1b	3.75864473669492	1.6290928120446e-11	Up
Steap3	3.74975829839384	6.56659594335528e-13	Up
Plek2	3.72544497255917	0.0118896410981987	Up
Trib3	3.72430521014814	1.29565754618438e-07	Up
Cdc6	3.71933304814322	2.62588638387544e-13	Up
Nfe2	3.71525900349007	6.24043398705264e-11	Up
Car2	3.7013284399613	2.29174677078938e-10	Up
Nxpe2	3.70061910879348	8.46085750947914e-12	Up
Abcb4	3.69780063747584	1.02817063463142e-09	Up
C1qtnf12	3.69557521260464	3.66214687934744e-13	Up
Cpox	3.68338410295564	3.66397749856126e-11	Up
Slc25a37	3.68286803356879	7.68397987481819e-12	Up
Atp7b	3.67241372611477	3.34237300493329e-07	Up
Tfr2	3.66135766479896	4.52722063859143e-11	Up
Fhdc1	3.64748758849221	8.67720868327211e-10	Up
Slc43a1	3.59407878377721	7.71969979868262e-09	Up
Abcb10	3.58460317461605	3.30097085014695e-13	Up
Ctsg	3.5816860288101	1.87558908035296e-08	Up
Mki67	3.55151199828305	1.12558673909676e-09	Up
Emilin2	3.53829361081531	3.41413469273338e-11	Up
Pdzk1ip1	3.53240131393485	2.01196670515869e-10	Up
Rps12-ps5	3.52412156811471	0.000797602745716912	Up
Slc4a1	3.51020212100103	0.000948178237257149	Up
Naaladl1	3.50010500523003	1.21111218252768e-10	Up
Omd	3.49575852438952	8.30193104510744e-13	Up
Depdc1a	3.49372033182786	3.43733795404555e-08	Up
H2ac15	3.49045849925835	1.78089094628202e-06	Up
LOC118567955	3.48456347673075	9.1597089648905e-05	Up
Ank1	3.48154981703363	1.01616666878703e-09	Up
Rec114	3.47312261473476	3.30728142432021e-11	Up
Knl1	3.46591952039852	2.71343140014402e-11	Up
Hmmr	3.46031967371272	4.89414082513953e-12	Up
Apol11b	3.43736384531608	0.000959562662564838	Up
H2bc9	3.43535176862578	0.000184513760346041	Up
Kif11	3.42771612242373	1.10063330173643e-12	Up
Cd24a	3.41748050834671	4.72727350844866e-11	Up
Lrr1	3.41671986214363	2.07419782406818e-08	Up
Mfsd2b	3.40324408402602	4.07497287382323e-13	Up
Ncapg	3.38960285649082	3.10684466104676e-07	Up
Stom	3.38305590194996	4.409579660644e-11	Up
Oip5	3.37697479563868	2.06363649787063e-11	Up
Kif14	3.36985415541485	2.19562096449558e-08	Up
H2ac4	3.36269157747184	3.20601797342068e-06	Up
Slfn14	3.35820141666322	0.00225181951511741	Up
Esco2	3.35133401670124	4.30764916837525e-11	Up
Sox6	3.34767007885563	5.14675518396339e-08	Up
Kif18b	3.32406999428761	1.33978543686895e-08	Up
Popdc2	3.3180792019275	2.50748910550341e-06	Up
Brca1	3.31730017135202	2.61412899843213e-10	Up
Prss50	3.31132686047923	3.84750501554513e-11	Up
Kntc1	3.30202924877905	3.27797476429933e-08	Up
Birc5	3.2997769111239	4.50367031174792e-12	Up
Bard1	3.2969439330919	4.23624055241799e-10	Up
Alas2	3.2959538039082	3.50572344583917e-08	Up
Ccna2	3.28549966329293	2.17445017643035e-11	Up
Mastl	3.2835163640832	1.21497816146819e-05	Up
LOC118567627	3.28172567662382	2.39066572947832e-07	Up
Aqp9	3.27383868773537	1.51648241108678e-10	Up
Pi4k2b	3.27085050359696	1.87852824514319e-08	Up
Dennd2c	3.27069799978836	3.67830639323862e-08	Up
Hbb-bt	3.26287545452422	7.5016368249688e-09	Up
Hbb-bs	3.2610551064802	4.22570267416822e-09	Up
Elane	3.25994958137001	4.02020723926198e-08	Up
H3c3	3.25004024589413	4.02538654620388e-06	Up
Cdca3	3.24995863839896	1.91363699609632e-11	Up
Sphk1	3.24952022563238	1.1562415304633e-11	Up
Tnfrsf14	3.21361619537342	3.3794411730638e-13	Up
Dtl	3.21198482910434	7.63854247883004e-12	Up
Kif4	3.21136088131516	1.11839534179655e-09	Up
Tspan33	3.21038796326082	2.68516661519794e-09	Up
Orc1	3.20802935991395	1.18747911038069e-08	Up
Pla2g4c	3.20403039101999	1.90183943350862e-06	Up
Cenpf	3.20290648386311	2.84325367301808e-10	Up
Dhrs11	3.2022423919042	3.60871517965483e-10	Up
Ube2c	3.19862559486876	1.20174513699409e-12	Up
Dlgap5	3.19679733576547	5.72314606994241e-10	Up
Ankrd61	3.19315831039825	0.000104987384666363	Up
Slc43a3	3.18921786720626	1.50506705163861e-09	Up
Art4	3.1883979456136	5.197885410501e-06	Up
LOC118568302	3.17214131548682	1.48564966301392e-06	Up
Cenpp	3.15935792994098	6.31207073047855e-10	Up
Ckap2	3.15820924006575	6.36462469742669e-12	Up
Aurka	3.15460613044536	3.81963029612428e-10	Up
H2ac7	3.15258636934312	0.000153397889184028	Up
Cdr2	3.14658588953548	1.70639048639136e-08	Up
Ddias	3.13788864534342	2.80081176820963e-06	Up
Cyp4b1-ps2	3.13466010978328	3.95403387723729e-08	Up
Gypc	3.13083898026954	1.93041784813686e-09	Up
Ect2	3.12767225918926	8.47060262735538e-08	Up
Sgo1	3.12607804171722	1.78499174170038e-09	Up
Parpbp	3.12292638263262	0.000214298873291376	Up
Gpsm2	3.10918747963916	1.54793182692033e-08	Up
Uros	3.10599817771593	1.94473277415701e-09	Up
Fbxo5	3.1041826777315	8.3302748966026e-12	Up
E2f7	3.09311638587618	4.72655246271139e-09	Up
Neil3	3.08396605094942	2.91984384231247e-09	Up
Aspm	3.07290563067604	2.88365214547937e-09	Up
Mis18bp1	3.05453637679963	1.13061370053983e-10	Up
Ccnb1	3.04873703842362	1.09951496198313e-08	Up
Spc25	3.04755825729548	3.86646855078526e-13	Up
Prss34	3.03836471149338	7.91245468276882e-05	Up
H2bc15	3.03380187829461	6.15691583484381e-05	Up
Diaph3	3.03222389258533	8.0293511406018e-09	Up
Prr11	3.03138568938435	1.44136266915325e-08	Up
Ankle1	3.01052300930106	8.04436816140345e-10	Up
Prc1	3.01045865198841	1.91436386171855e-08	Up
Cenpk	2.98831111015071	1.07667225093338e-08	Up
Ttk	2.9877307942929	1.08385054877058e-07	Up
Pbk	2.98724668635947	6.28474694847154e-11	Up
E2f2	2.97790895445664	3.40916002763785e-10	Up
Prtn3	2.97255726136499	5.90222548171954e-07	Up
Clspn	2.97076429770056	1.15520806783155e-09	Up
Fech	2.96890937317522	2.77308328213821e-07	Up
Nusap1	2.96786091059656	1.30338683317539e-10	Up
Chac2	2.96753066342082	1.24310799766219e-08	Up
Rsad2	2.96531823860266	1.32880997939879e-07	Up
Fignl1	2.96249615997664	7.80378612505217e-09	Up
Ppp1r15a	2.96185874192478	1.96234214157751e-07	Up
Apol11a	2.95938420482407	0.0251220906900549	Up
Rfx2	2.95781946912303	3.71106659859361e-11	Up
Ubac1	2.95703877963949	1.18670339242854e-10	Up
Tfdp2	2.95651025422875	5.24161196972364e-08	Up
Ifrd2	2.95210490765585	1.37618570676452e-06	Up
Cenpl	2.94791106756662	1.74011996681606e-09	Up
LOC118567636	2.93221410489758	3.58248594185461e-05	Up
Ccnf	2.93013108087464	9.67973392049057e-10	Up
Tmcc2	2.92851191017166	9.35568509929104e-07	Up
Bub1	2.92682712465537	7.28730001851812e-06	Up
Fn3krp	2.92584525805454	2.15103952837134e-08	Up
Smc2	2.92288536840702	2.71322895761059e-11	Up
Ncapg2	2.91457333274064	6.21914642653208e-09	Up
Fam117a	2.91359136687424	5.39678231274561e-09	Up
Blvrb	2.91280124089023	2.23892177767257e-08	Up
Arhgef39	2.91210595634661	1.536545710124e-09	Up
Ccnb2	2.91185422501553	3.88819389288002e-09	Up
Ms4a3	2.90471874491064	6.09159097466568e-06	Up
Asf1b	2.90356580879538	1.06337991887168e-08	Up
Gclm	2.90310027741488	2.31491388463213e-09	Up
Mpo	2.90254802790259	4.94447947982724e-05	Up
Slc16a1	2.89868536724457	1.82264791336108e-08	Up
Rab3il1	2.89296618944721	1.01223168810584e-07	Up
Abcg2	2.89220969461787	7.67855407096682e-09	Up
Hyal3	2.89167950611662	0.000123527279658111	Up
Cks2	2.88976861537098	1.7464681881143e-08	Up
Pif1	2.88414009427808	4.56969486568412e-09	Up
Gas2l3	2.87718106928904	3.5700016490486e-06	Up
Slc39a8	2.87528768163694	1.90936609509862e-06	Up
Ticrr	2.86902399993761	1.20577018482549e-05	Up
H3c4	2.86061874152021	0.00030995610422697	Up
Rn7s1	2.85441875965049	1.18593943509545e-05	Up
Gen1	2.85314171407342	8.990073650356e-11	Up
Ska1	2.83696737260086	2.53657438210309e-08	Up
Isg20	2.83637668206086	4.26769176073666e-08	Up
Kif15	2.83364198017141	1.66419282692892e-09	Up
Fbxo30	2.83025479976325	2.41381876536658e-07	Up
Sh3yl1	2.8293691425669	3.14493670429963e-05	Up
Zfp972	2.82584374529383	0.00352554477869363	Up
Rad51ap1	2.82344751325441	1.57781173279435e-09	Up
Mxd3	2.82321834549337	7.17558772203647e-08	Up
Cenph	2.8231838812366	1.53132867066353e-10	Up
Mir296	2.82298802741221	0.00880866349421083	Up
Fam241a	2.81578881470841	6.08884194058264e-09	Up
Dyrk3	2.81062305939158	5.25512714259769e-05	Up
H2ac24	2.80791203645801	2.50169116535703e-06	Up
Lockd	2.80540465063445	3.76692449067406e-12	Up
Gtse1	2.79744937979242	5.3400490244237e-08	Up
H3c11	2.78929918042112	0.00177890072710244	Up
Kif18a	2.78917444488084	1.65237640479753e-05	Up
LOC118567443	2.78890358867361	6.73565202247283e-06	Up
Klf11	2.78378993849443	1.49898392035442e-07	Up
Anp32b-ps1	2.78330295743751	0.00135262898746513	Up
Marchf3	2.7824687522847	1.37379949001578e-07	Up
LOC105246914	2.78239905007091	0.000999741300513871	Up
Fn3k	2.78140257214574	4.94653636594717e-08	Up
Fbxo48	2.77720468726797	8.55805566246808e-07	Up
Prdx2	2.77577010433533	8.86038389836536e-10	Up
Gch1	2.77559324305318	1.07779031437014e-10	Up
Cdca5	2.77094165532714	3.00926290156679e-09	Up
Cenpe	2.7688441461089	1.10004646812215e-08	Up
Cd59b	2.76337128017724	1.87460391188886e-07	Up
Atad5	2.76191706922656	1.27310082314717e-08	Up
Smim1	2.75913160544775	1.27361520596981e-08	Up
Gdf3	2.75255322090925	0.000181893716104153	Up
Mylk3	2.75137898248823	3.58032024378467e-07	Up
Xpo7	2.74968298945618	8.40666837958982e-07	Up
Fanci	2.74165624072526	7.46441342681484e-05	Up
Ranbp10	2.73671745794741	2.10245344264793e-07	Up
Rrm1	2.73565208569537	5.8178052866742e-10	Up
Slc6a9	2.73382077438763	6.71697370265656e-06	Up
Mcm10	2.73231789987093	2.78186342512309e-08	Up
Kifc1	2.73032501905602	1.00169094899094e-09	Up
H4c12	2.72623958771883	0.00115075706627466	Up
Top2a	2.72190374207415	3.68428287543927e-09	Up
Alad	2.7206891280076	3.76444124162723e-10	Up
H2bc13	2.72057066229079	0.00329603127360161	Up
Brpf3	2.7144456795778	2.62064652308811e-08	Up
Ypel4	2.70985444362098	8.67950182493371e-05	Up
LOC115487153	2.70828041094332	0.00104955760539423	Up
Epb41	2.70782575028515	4.77710365973754e-06	Up
Nmnat3	2.70020179897606	1.44213957648522e-07	Up
Marchf8	2.69628298237119	4.90939108058836e-07	Up
Cenpu	2.69592533849082	0.000659607019825491	Up
Kif24	2.69574333941244	3.18390575660995e-10	Up
Iqgap3	2.69530096333328	1.9154269651583e-07	Up
Pask	2.69263461118473	4.71462611200569e-08	Up
Pigq	2.68667861987364	1.00074349533198e-08	Up
Trmo	2.68631000372498	3.26884834024195e-08	Up
Ube2l6	2.6841172023352	1.2226999602108e-06	Up
Hba-ps4	2.6838283935485	0.00033905702546326	Up
Tnfaip2	2.68013676091596	1.92789236871306e-08	Up
Nsl1	2.67982628822905	1.41939113376768e-06	Up
Cited4	2.67431769537774	2.90998367970914e-08	Up
Gadd45a	2.6668296721536	2.55530860323957e-07	Up
Snord12	2.66197459695898	0.00667467140266624	Up
Zfpm1	2.65970162268086	8.16372767910456e-08	Up
Ncaph	2.65822087493887	8.46238526302435e-08	Up
H2bc8	2.65797771651621	8.24823469645968e-05	Up
Hmgb3	2.64950110165789	1.14196482128506e-08	Up
Fam210b	2.63258318642578	5.49285950377674e-08	Up
Carhsp1	2.63084888807235	5.09576398636698e-07	Up
Amd-ps3	2.62545114267289	0.000141042114573565	Up
Prx	2.62157288376963	0.000125402518013855	Up
Lrrc39	2.61903285949945	4.16837105681287e-05	Up
Soat2	2.61163654144621	4.61241612884569e-06	Up
Tpx2	2.60680565637501	2.86652655448257e-08	Up
Rgcc	2.60527402692255	4.67590107942494e-08	Up
Cdkn2c	2.59815395167225	5.4632919291705e-08	Up
Cip2a	2.59644746082605	1.08718523175288e-06	Up
Fnip2	2.59635637305704	1.59369144826067e-08	Up
Micall2	2.59187918797936	7.79589211444892e-09	Up
Blm	2.5872695577635	5.41004731956248e-08	Up
Plk4	2.58447994698825	1.11970030568596e-06	Up
Urod	2.58260000380928	8.13188502694444e-09	Up
Aunip	2.58012488776248	3.10533694654777e-07	Up
Fam83d	2.57762722055786	8.49868671015882e-06	Up
Cdk1	2.57604970439828	5.02688194006976e-10	Up
Mcm2	2.5741684558835	7.07137808091427e-10	Up
Abcb6	2.57320509805636	5.86101867751293e-09	Up
AK157302	2.56820776781536	0.00598711303153901	Up
Kbtbd6	2.56523857891885	0.000204705721980894	Up
Tom1l1	2.56485152595987	0.00030575409271528	Up
Slc14a1	2.56415055942124	1.87055116593019e-07	Up
Ccne1	2.56049815135618	5.53859163434159e-10	Up
Kif22	2.55737555081253	1.51116114013124e-08	Up
Sh2d4a	2.55416042876655	7.65517302048481e-08	Up
Cep76	2.55296364248798	8.41428094075192e-08	Up
Atad2	2.55286883876317	1.22975920067201e-08	Up
Ppox	2.54540373260976	4.88221935039371e-08	Up
Ercc6l	2.54513161996891	0.000166019135544744	Up
Rps12-ps19	2.5448202166369	5.81133302555538e-07	Up
H2bc12	2.54439513168478	0.00193842699460097	Up
Snord42a	2.54216397361379	0.00558570899188367	Up
Foxm1	2.54192538422438	7.11034061102243e-07	Up
Nuf2	2.5252830914829	4.05468301345596e-09	Up
Slc66a2	2.52434431635691	1.98936705348522e-08	Up
Dapk2	2.52225881106804	4.59986936716193e-06	Up
Gpx1	2.51694568104927	4.41319846758507e-08	Up
Glrx5	2.51576111371894	2.36062157396831e-12	Up
Ntn4	2.51479119809212	0.00140338868573384	Up
Nek2	2.51449852148963	1.23240590946135e-07	Up
Hrob	2.5144411687978	9.04883307829592e-05	Up
Kif2c	2.51254168040909	3.10188788743181e-07	Up
Odc1	2.51202254255511	4.48166277684451e-08	Up
Hpn	2.51047787190084	3.20151065420834e-08	Up
Troap	2.50936526699653	3.38494121031867e-08	Up
Sptb	2.50572487329258	4.86182335883701e-05	Up
Tmod1	2.50487555559031	0.000681689430634509	Up
Asb1	2.50471467944046	1.37841443385079e-06	Up
Uhrf1	2.50235967463361	6.57991623135203e-08	Up
LOC118567504	2.5002997532772	0.00201528579494426	Up
Rad51	2.49691184811653	5.00969670967577e-06	Up
Rad54l	2.49287671767054	2.29872432843078e-06	Up
Mms22l	2.49218578440627	3.37522914933331e-09	Up
LOC118568233	2.49079347055679	0.0476905068146683	Up
Sgo2a	2.48836235414535	3.11838212273483e-07	Up
Fcnb	2.4871016413887	0.00928671797843022	Up
Spag5	2.48431316735144	6.5523838214224e-08	Up
Plk1	2.48301608837852	1.75117092170674e-09	Up
Mexis	2.48267116654544	0.00522720035759515	Up
Tyms	2.47999421763352	3.08404259933093e-08	Up
Eme1	2.47922476557322	0.0002214990195547	Up
Ccrl2	2.47900052785932	0.000355228334102235	Up
H2ac23	2.47799787910471	5.64107588631665e-11	Up
Paqr9	2.47734675825535	2.13575018871192e-06	Up
Stx2	2.47463810853675	3.30743903316208e-08	Up
Hebp1	2.47217134096138	1.48555087233223e-07	Up
Siah1b	2.47128110038513	2.6949591003186e-07	Up
LOC118568257	2.46312173787169	0.000606114697941807	Up
Fen1	2.46217612405729	1.9705975480589e-07	Up
Slc22a4	2.45978460391239	1.91543869309637e-05	Up
Ptdss2	2.45840695505181	5.53883062632658e-06	Up
Mir6236	2.45512785970699	0.00542020400874192	Up
Cdc45	2.44673456406602	2.64088367555139e-06	Up
Cdc25b	2.4418192853355	1.80258485178307e-07	Up
Mybl2	2.4406652941713	3.52955245991567e-07	Up
Cenpn	2.43863756737279	1.64119544473519e-07	Up
Pole	2.43195408632791	6.62950415235886e-06	Up
Usp49	2.43178701091029	1.06511522756279e-06	Up
LOC118568249	2.42754788682257	0.00169130561470388	Up
Espl1	2.42726516670329	2.67598813377021e-08	Up
M1ap	2.42102606470306	2.70802108441282e-06	Up
Slc7a5	2.41754462072569	2.32656869008957e-08	Up
Polq	2.41427245720957	2.65469488751569e-07	Up
Exo1	2.41406919375074	0.00015847281893879	Up
Ndc80	2.41389123473741	1.05042350148889e-06	Up
Dck	2.41123945284173	1.1127792759031e-06	Up
Nadk2	2.40863991637652	1.56706348967764e-07	Up
Tmem14c	2.40804870991384	4.2526854296713e-08	Up
Mtfr1	2.40773751019588	1.00119506086148e-07	Up
Tacc3	2.4074327621326	7.26898440921558e-08	Up
Kif23	2.40498897599322	1.4549163013254e-06	Up
Mcpt8	2.40451268031481	0.000899651024959713	Up
Slc25a38	2.39877380048559	1.67887093701264e-08	Up
Dclre1a	2.39738909887841	9.44776660279346e-06	Up
Tac2	2.39698001187339	4.08869751832851e-06	Up
Tlcd1	2.39555819738606	3.79300790640815e-06	Up
Trak2	2.38864591396255	2.68481252349109e-06	Up
Cdca8	2.38631519979171	1.1686275341196e-06	Up
LOC118568194	2.3822453303959	0.000454015032035387	Up
Slbp	2.38131675165312	1.35068115330061e-05	Up
Kpna2	2.37937803807435	4.31597637333159e-06	Up
Cdkn3	2.37923582200215	1.53171901038384e-05	Up
Slc26a1	2.37878460016972	0.00025751347917588	Up
Rps2-ps9	2.37869647805505	1.47471061982193e-05	Up
Pcna	2.37382453220291	9.74676423040969e-08	Up
H3c6	2.37003585443848	0.000469586003218021	Up
LOC118568354	2.36823531781877	1.37191223474109e-06	Up
Cdc20	2.3675346172281	1.25232174771486e-05	Up
Cenpa	2.36617407218428	2.0338769290202e-06	Up
Tent5c	2.36214967242721	1.18532537715858e-05	Up
Aurkb	2.36021158136408	1.20567533046252e-05	Up
Ska3	2.35800056366195	1.99496771820443e-06	Up
Hba-a2	2.35774054261757	7.24141065559312e-05	Up
Wdhd1	2.35111733597888	1.92813672641117e-07	Up
Spc24	2.34949768090023	3.7789499033626e-10	Up
Tk1	2.34739091405518	1.02136529563457e-07	Up
Zfp808	2.34716872511099	7.07745100726147e-06	Up
Mtfr2	2.34684025817686	1.00771190269325e-05	Up
Melk	2.34443253913288	8.80463824282796e-06	Up
Atg4a	2.33012709727652	1.27681301186181e-06	Up
Mier3	2.32864575268912	2.83669383766745e-06	Up
LOC118567709	2.32767229540994	5.71573438025863e-06	Up
Nt5c3	2.32756641544642	6.02013774507755e-07	Up
Slc25a51	2.32507075017279	3.65234198984251e-07	Up
Zwilch	2.32358828156925	2.37697446073637e-05	Up
H2bc11	2.32278474494715	0.000824457050179075	Up
Pola1	2.32088610670985	8.32221940624988e-06	Up
Dmtn	2.31647738752493	6.87049160986386e-06	Up
Eif2ak1	2.31567311788379	7.15545030236321e-08	Up
Add2	2.31103120772772	3.89960985661718e-06	Up
Mns1	2.30967145350055	6.66871379535623e-07	Up
Specc1	2.30959548512104	2.21956855525919e-05	Up
Ccdc18	2.30938985005916	5.71549299763581e-07	Up
Mcmdc2	2.30839509456735	0.000438734521006801	Up
Foxo3	2.3074360313401	3.46240096317443e-07	Up
Tcf19	2.30383042305461	2.32155068319802e-06	Up
H2bc18	2.30362417493963	0.00227968647039611	Up
Arhgap19	2.30238298151427	1.95251786534519e-07	Up
Txnrd2	2.29574139827902	1.83231399624688e-07	Up
Nemp1	2.29348359781134	5.23534305519825e-06	Up
H4c4	2.29316749504454	0.00073083802681223	Up
Hba-a1	2.29090986889813	0.000239820529209784	Up
Fam53b	2.28967794365817	4.1039764003559e-07	Up
Cdca2	2.27552141894913	7.86615796789417e-07	Up
Arhgap11a	2.26201761416348	4.28639256939621e-06	Up
Smox	2.25624953160005	1.39099741085524e-06	Up
Gclc	2.25196835944331	1.53327097554648e-07	Up
Usp32	2.24743991008703	1.26783918057688e-05	Up
Cks1b	2.24312170312198	7.17085377529362e-07	Up
Ccne2	2.24145718589836	1.79359395656068e-06	Up
Crnde	2.23920880613107	0.00237732421219625	Up
Pkd2l2	2.23769543816966	1.3630853667457e-05	Up
Lbr	2.23283671129489	3.5456745112274e-06	Up
Hmgb2	2.22727494904607	2.87526953879845e-06	Up
H2ac8	2.2271738614233	0.000700149873740834	Up
Memo1	2.22577950428775	6.28841153700168e-07	Up
Chaf1b	2.22011222192928	8.96958722776643e-06	Up
Ngp	2.21850528536559	0.00073756329078823	Up
Gins1	2.2153237749347	7.27695980490322e-06	Up
Isg15	2.21216177373614	7.49527341477888e-05	Up
Optn	2.21024663450644	9.8177754831857e-07	Up
H3c1	2.20400965975178	0.0351300365557874	Up
Mad2l1	2.19857483396607	1.79250932822945e-06	Up
Cln8	2.19828184950702	5.6167066637752e-06	Up
E2f1	2.19305900873012	1.40756295839627e-07	Up
Zfp39	2.19146834796378	1.4642749968319e-05	Up
Chek1	2.19038331789802	4.43251230792285e-05	Up
St3gal5	2.18978032410144	7.32404651160113e-06	Up
Ube2t	2.18741917780119	4.30953249131726e-06	Up
Neu3	2.18478376315282	0.000344490894332843	Up
Pnpo	2.18475810569634	1.7411119779394e-06	Up
LOC118568312	2.18388174580582	0.000327545278236813	Up
Tinagl1	2.18360476316595	7.89704736767826e-06	Up
Mcm5	2.18336902329693	3.42036323846542e-06	Up
Mcph1	2.18242549836669	1.0863863844895e-06	Up
Iba57	2.18066343034522	4.50399118897451e-07	Up
Mgst3	2.17335326181573	3.84983599805312e-06	Up
Ska2	2.1723525739215	2.15911544776264e-06	Up
Pclaf	2.17146613298306	4.95585552315953e-08	Up
Zgrf1	2.16978283118777	2.2641341860222e-05	Up
Narf	2.16925591769872	2.35193107498446e-06	Up
Nqo1	2.16739703040456	0.00021401817904966	Up
Sdsl	2.16685988191438	5.01397052119952e-06	Up
Trim59	2.16525754387537	8.89271789482234e-07	Up
Cracd	2.16358500945719	1.4139837022108e-05	Up
Scrn3	2.16256403955206	3.48218065746232e-06	Up
Mxd1	2.15973443184256	9.93804759690193e-06	Up
Efcab11	2.15352252922446	0.0136338742734298	Up
Pnp	2.15185679808842	2.92876986722597e-05	Up
H2bc3	2.15168276340422	0.00480854889986657	Up
Serpinf2	2.15137479463693	0.00608651333110133	Up
Agtr1a	2.14635332524599	0.000336802511384849	Up
AA465934	2.14628099596092	0.000717865946056483	Up
Lmna	2.14542582037673	9.66682103566936e-06	Up
LOC118567922	2.14363530108358	0.0177208578789362	Up
Psrc1	2.14252736616816	3.25016386016507e-06	Up
Pcyt1a	2.14170345641293	4.65370514025921e-05	Up
Ninl	2.13855357233152	3.91835882577293e-05	Up
Bsdc1	2.13541893764276	2.10208207655108e-06	Up
H2ac6	2.13365442352228	0.000765647285908958	Up
Creg1	2.13298172479879	3.62668398021713e-06	Up
Rps12l1	2.13077485618043	0.00599764206511054	Up
Vangl1	2.13046653220523	1.59228805453521e-05	Up
Mcm7	2.12682730344912	3.85190916829996e-06	Up
Mthfd2	2.12337637235737	4.37096993372143e-06	Up
Cenpi	2.12326412347416	0.000426672702771069	Up
Lmo2	2.12319113837249	4.86174644465836e-06	Up
Tes3-ps	2.11836927285786	0.00538257938027687	Up
Snx22	2.11833644844877	1.76562091754123e-05	Up
Dna2	2.11343460202041	1.49575588737562e-05	Up
Dpf3	2.10903574606158	0.0135768154058871	Up
Spdl1	2.10714443710949	2.31409206788285e-05	Up
Bpgm	2.10289136824563	0.000129516122217891	Up
Pabpc4	2.10001445908033	3.18368526904967e-07	Up
Rbm38	2.09957699231645	1.4823293297733e-05	Up
Cela1	2.09621732138178	9.58132051507501e-06	Up
Pip5k1b	2.09461681949536	0.000109315605352175	Up
Dhfr	2.09256324698879	1.97346646854912e-05	Up
Recql4	2.09012810593555	0.00139999495788961	Up
Minpp1	2.08643174054778	1.61154600780722e-06	Up
LOC118568687	2.08557994167894	0.00183671949159615	Up
Knstrn	2.08367712178821	2.34443314451028e-06	Up
Smim5	2.08105717788691	8.18033813989334e-06	Up
Lpcat3	2.08084245181784	6.45718358624694e-07	Up
Ybx3	2.07990527770386	4.07532272386333e-07	Up
Picalm	2.07910995878042	1.00873473142592e-06	Up
Dek	2.07520983333063	6.70191645004701e-06	Up
Dbf4	2.07381110528882	5.19431493308444e-05	Up
Sec14l2	2.07109399089446	0.000353881309714915	Up
Mcm4	2.07094679774661	1.47057050282542e-05	Up
Lig1	2.06921071064862	9.9585240430366e-08	Up
H4c11	2.06835999625399	0.00550080908359261	Up
Kif20a	2.06628519917181	0.0148348878003685	Up
Cdyl	2.06298816456367	9.46379108834671e-06	Up
Prim2	2.06285626988544	4.45269780516097e-05	Up
Tab3	2.06239507337945	9.64013886994446e-05	Up
Rfc4	2.06190392542353	0.000594095623219415	Up
Mrm1	2.06156994464587	8.23448674204397e-06	Up
n-TEctc4	2.05990805092632	0.00424788521518929	Up
Tbxas1	2.05913688547434	1.3595797255568e-07	Up
Racgap1	2.05866071276278	6.56269167672083e-06	Up
LOC118568295	2.05747568019912	0.00694448858938528	Up
Fam214b	2.0572406617188	1.12840282071623e-05	Up
Prkar2b	2.05598135397577	2.83726092524246e-05	Up
Slc6a20a	2.05221639676247	0.00254319532577805	Up
H2ac11	2.05148763417088	7.8946668819516e-06	Up
Kifc5b	2.04687435742591	8.12261469494098e-06	Up
Stard10	2.04496186469884	6.12313896534482e-06	Up
Dnajb13	2.04481291029681	0.000110479257766151	Up
Fzr1	2.04382871185281	1.33743077392262e-06	Up
Rnf139	2.03770176193152	0.000509997523160667	Up
Gcnt1	2.03768015250796	6.24065673736494e-05	Up
Stradb	2.03023225563628	1.49412136099346e-05	Up
Bcl2l1	2.02714702626011	3.25955086230364e-05	Up
Dnph1	2.02559216377325	2.00322424497462e-06	Up
Tipin	2.02269487995644	5.70428112233675e-06	Up
Wfdc3	2.02169719324651	0.0196814553102063	Up
Dclre1b	2.01983412634566	0.000640917888073962	Up
Dscc1	2.01885391050604	0.000448259236590815	Up
Syce2	2.0148231120682	4.70056145782644e-06	Up
Asns	2.01335167240387	0.000143634081688923	Up
Chaf1a	2.01278413183828	0.00029542873083671	Up
E2f4	2.00987703924791	6.03457737695422e-06	Up
Rfwd3	2.00872677905332	1.19289671472635e-05	Up
Tmem120b	2.00630858513334	9.22613037946452e-06	Up
Arhgap23	1.99841606996186	7.58158052753011e-06	Up
Rad23a	1.99757038896881	6.74976065055049e-05	Up
Ankrd9	1.98946870097258	0.00037723676830984	Up
Rad18	1.98910932033911	0.000492822601566923	Up
Pim1	1.98875784745742	2.6328541390829e-05	Up
H4c9	1.98539071125612	7.07993485131636e-06	Up
Tigd3	1.9849505848312	0.000198677292428608	Up
Trip13	1.98460302637337	0.00152964817789404	Up
Ube2s	1.98368889799625	8.28569170756452e-05	Up
Hace1	1.98357312237563	4.21743470517677e-06	Up
Rpph1	1.97964003459286	0.000188231210099589	Up
Clcn3	1.97911814144521	6.25390632029875e-06	Up
Sppl2b	1.97610509640802	1.76946830861911e-05	Up
Metap2	1.97421832569534	2.46322316137055e-05	Up
Cul4a	1.97228598041064	1.1036407140668e-05	Up
Zfp367	1.96852732427534	9.58792870090116e-05	Up
Marchf2	1.96519335187958	1.35912728515889e-05	Up
Aplf	1.96145006718235	5.23295479461725e-05	Up
Otub2	1.95883038452302	0.000101049312217954	Up
Trim43c	1.95658003807024	0.000262478290210941	Up
Fzd5	1.95630086225764	0.000477136884141382	Up
Fam126a	1.95552618169514	1.58024888524912e-06	Up
Ccnd3	1.95538128379737	2.54865626940788e-05	Up
Mkrn1	1.95521921068046	3.71450988576596e-05	Up
Gid8	1.95322459601534	2.07384316020705e-06	Up
G2e3	1.95308521201452	0.000114598640047267	Up
Pla2g12a	1.95236055868426	2.81430916074594e-08	Up
Myo1d	1.95015448316809	2.82028933544518e-05	Up
Klf3	1.94821804433742	4.76762683634934e-05	Up
Samd14	1.94816452168766	7.02503031683806e-05	Up
Lmnb1	1.94465112360696	4.68300570595447e-07	Up
Tex9	1.94420606517021	5.82261139706224e-07	Up
Ttll12	1.94193411350514	4.00741747383908e-06	Up
Gan	1.94103239527973	0.00577225021568613	Up
Aldh1a1	1.9375462053383	0.000943333879849884	Up
Pfkfb1	1.93110728545593	0.000174989248558036	Up
Artn	1.92981757231796	0.00835100263005317	Up
Yod1	1.92925027522601	9.0710762234932e-05	Up
Zfp101	1.92894529094367	0.000756135071545187	Up
Wipi1	1.92859003071441	5.3521350133495e-05	Up
Cd59a	1.92555723968873	3.56934615216827e-06	Up
Suox	1.92472720636587	2.35147676610055e-05	Up
H4c14	1.92441037307336	0.0072267916182056	Up
Lars2	1.92189058535857	0.0018840536018088	Up
Shcbp1	1.9218397841994	0.000856262682248282	Up
Piga	1.92173840730692	1.07731046643139e-05	Up
Rps2-ps11	1.92094224765347	0.00324543650808292	Up
Map4k5	1.92031335080913	1.75628402973506e-05	Up
Mpp1	1.9166323097379	1.22240700593931e-05	Up
Kcnn4	1.90610625466612	5.77628122521553e-06	Up
Pcna-ps2	1.90141774333417	0.00216517607063016	Up
Naprt	1.89943729492763	6.25617759317238e-05	Up
LOC118567503	1.89506554943234	0.0130808487542256	Up
Isca1	1.89497724014108	4.22277913411446e-05	Up
Adam10	1.89390413732308	3.04424705371329e-05	Up
Fahd1	1.89014287398282	1.08182035394195e-05	Up
Ezh2	1.88961540133117	7.13366623308274e-07	Up
Ccdc34	1.88773642050348	8.59310411756288e-06	Up
Mpst	1.88221586416823	0.000202570219601454	Up
Oas3	1.88216730884754	0.000176270335613108	Up
Chil3	1.88177146525881	0.00134510477547001	Up
Ammecr1	1.87609417653448	4.95623064020698e-05	Up
Scarna9	1.87549251386996	3.71065544731414e-05	Up
Trem3	1.87441395624609	0.00808867148982287	Up
Mylpf	1.87287589743438	0.0496549169705445	Up
Sertad2	1.86897453007275	3.71531508424019e-05	Up
Mcm3	1.86877413378674	3.17681602758969e-05	Up
Ncapd2	1.86492632728611	7.75575820381947e-07	Up
Rpl26-ps4	1.85967383794305	0.00438409895199987	Up
Hagh	1.85857858476101	5.13906440252795e-06	Up
Snca	1.85775316770447	0.000347775041271785	Up
Cmpk2	1.85768790117018	0.00116349258663577	Up
Syne3	1.85582693453133	0.000250804921211963	Up
Ncoa4-ps	1.85505918719762	0.0037221164129935	Up
Apoa1	1.85302419425763	0.0231547955533172	Up
Mcm6	1.85224915302121	0.000124135156606244	Up
Brip1	1.84457904541289	0.000799979565634254	Up
Muc6	1.83905080585914	1.90597642198526e-06	Up
LOC118567450	1.83886601353815	3.79888421417169e-05	Up
Ube2o	1.83599785524129	0.000212585219336879	Up
Dsn1	1.83443681345987	8.7677515403263e-05	Up
Nxpe5	1.83346713348081	0.0326432203256424	Up
Fam229a	1.8278573140298	0.0206938352864217	Up
LOC118567721	1.8276496988603	5.9449317770337e-05	Up
Bcas3os1	1.82579356804415	0.0011643911132012	Up
Cachd1	1.82424934676809	0.000972860864399868	Up
Arl6ip6	1.82358349664927	4.07816265719537e-05	Up
Lcn2	1.82242652694537	0.00987192050567826	Up
Tlcd4	1.82001785347051	0.000606862673781928	Up
Ddx4	1.81887133466711	0.000228692688402706	Up
Cdt1	1.81819300059409	0.000680301053648482	Up
Net1	1.81698105741964	2.6435795071237e-05	Up
Incenp	1.81429883094519	4.35643993594413e-05	Up
Ehbp1l1	1.81371722525537	2.63435328579367e-05	Up
Evi5	1.81270526630346	0.000225494221172056	Up
Kif20b	1.81141882933384	0.000564338991906325	Up
Bub1b	1.80790350718707	0.000132467766101837	Up
Tbccd1	1.80762836129204	0.000206933793374065	Up
Cyth3	1.80753125485396	5.17050845759505e-05	Up
Fam220a	1.80710791159262	0.000149896945405162	Up
Lpcat1	1.80660159252422	2.49247037669341e-05	Up
Tmpo	1.80623235365494	6.07466978981982e-05	Up
Orc6	1.8051172765516	6.35985995249014e-05	Up
Bag2	1.80405249513114	0.00141903766253104	Up
Ift140	1.80253519317623	9.12669925360689e-05	Up
Map3k20	1.80204282756353	3.40534432224164e-05	Up
Rpa2	1.80111331418963	1.88731664474389e-06	Up
Ufsp1	1.79911427790884	3.67771708910713e-05	Up
Fancd2	1.7986066224924	0.0019619532699923	Up
Rn7s2	1.79564891902196	0.00653490128577563	Up
Pnma1	1.79466748571942	0.0121667288066871	Up
Atpif1	1.7902508401548	6.78294225873681e-06	Up
Tuba1c	1.78969176844215	2.19486917030906e-05	Up
Pck2	1.78859887242666	1.50494145362171e-05	Up
Vopp1	1.78501361279645	0.000156349239062093	Up
Rnaseh2b	1.78286095579989	1.57986661385248e-05	Up
Inka1	1.7827747342401	0.000706646612649473	Up
Lin54	1.77970165581466	0.000656907683768907	Up
Ampd3	1.77951446159181	0.0014419009613288	Up
Chtf18	1.77663938967202	0.000111224895819385	Up
Cenpm	1.77618983111837	8.46958834213786e-05	Up
Muc13	1.77546348515814	0.00311028882290561	Up
Selenbp1	1.77516362855633	8.03228205239096e-06	Up
Rad54b	1.77390875822862	0.00551376578679792	Up
Prdx2-ps1	1.77002514642768	0.00909040035342818	Up
Oaf	1.76965609386149	0.00142940894187272	Up
Psmf1	1.76921349663165	0.00015449133518024	Up
Mafk	1.7685465110296	0.000562706760054056	Up
Dnajb3	1.76811044451839	0.000744429280544131	Up
Nudcd2	1.76434290318717	0.000520146004936848	Up
Prss57	1.76320858643727	0.0284383991883842	Up
Rffl	1.76214106488252	0.000359962718061972	Up
Fgfrl1	1.76158391511786	0.000546864680566406	Up
Rb1	1.75352293788074	0.000179434949253293	Up
Usp25	1.75188019809109	0.000144634540166324	Up
Eldr	1.74854293486404	0.000257285411226589	Up
Gdf15	1.74767333960557	0.0117643912438045	Up
Prdx3	1.74669719256496	2.59742038629183e-05	Up
Cmas	1.74191215872276	2.2174253331612e-05	Up
Daam1	1.73886596849381	4.28279647677077e-05	Up
Pfas	1.73835499349272	5.57864826938638e-06	Up
LOC115486328	1.73631424838975	0.0275914242711247	Up
Nudt4	1.73299698979812	0.000189974581098223	Up
Bex4	1.72620825360285	0.00128049427399901	Up
Kmt5a	1.72595671764594	6.12452350016749e-05	Up
Mmel1	1.72479430290627	0.012895085817023	Up
Slc25a24	1.7218583932041	0.000285724606498331	Up
Ccdc92b	1.7204121583092	0.0057409014704888	Up
Alkbh8	1.71956871780423	1.36518414234993e-05	Up
Natd1	1.71538908509076	0.000154604994815006	Up
Golim4	1.71446797320374	0.00118114657182366	Up
Rab43	1.71301171790656	0.000426936778303639	Up
Tut7	1.70961403425224	0.00132871611794006	Up
Polh	1.70702398752994	6.14496487344376e-05	Up
AA986860	1.70579876548862	0.00455033602242629	Up
Cbx3-ps6	1.70475408616081	0.00689485742008127	Up
Rbl1	1.70305197734204	0.000174656100889344	Up
Tfdp1	1.70137226399796	0.00060313138041538	Up
Map2k3	1.70117506858399	0.000116473093302258	Up
Abcg4	1.6984892290181	0.00117517029775864	Up
Dennd4a	1.69839814023106	0.000116591267514778	Up
Sass6	1.69791179715564	0.00014581509737542	Up
Arf5	1.69314525485989	2.42229839528325e-05	Up
Afmid	1.69102012645803	5.61024526507555e-05	Up
Dut	1.68854488017118	1.18768050177877e-05	Up
Dcaf12	1.68837039708045	7.55541620399423e-05	Up
Plagl2	1.68677504989796	0.000122335888299358	Up
Rps7-ps2	1.68547026186776	0.0348263372453586	Up
Hspb7	1.68261627956599	0.0197376526832877	Up
Acsl1	1.68156739679707	0.000385813170855875	Up
Ppm1d	1.68026133547457	0.000152610253473516	Up
Ncapd3	1.67956041149137	0.000262562352188828	Up
Tubb4b-ps1	1.67612839716141	0.0156385522292543	Up
Pkn2	1.66934600943262	0.000192458165668089	Up
Camp	1.66711603896115	0.0133245969415885	Up
Lrrc29	1.65776447349627	0.00269764290426197	Up
Slc11a2	1.65632942281471	3.52073616216096e-05	Up
Fbxo7	1.65589784614746	1.24716989874768e-05	Up
Stxbp4	1.65368080137278	7.1668542528962e-05	Up
Tbcel	1.65206813941645	0.00013817649096915	Up
Gpr146	1.64869523635317	0.00031362094147452	Up
Hdgf	1.6458284012853	7.60100408144653e-07	Up
Cpeb4	1.64533457082362	0.00116853809637449	Up
Smc4	1.64529937822351	4.50728018074792e-05	Up
Cdca7	1.64502627748013	0.000316676954690695	Up
LOC118568621	1.64411001211873	0.0107342398422467	Up
Arl4a	1.64400848300437	0.000295609438857628	Up
H1f4	1.64240318853069	0.00690060231616333	Up
Slc35g1	1.64076603458543	0.00782192534531001	Up
Cercam	1.64064943076535	0.000499542765280828	Up
Sertad3	1.63904859165202	0.000221273702435767	Up
Topbp1	1.63861334514272	0.00038730931746574	Up
Rad21	1.63394091265935	9.1811022417224e-05	Up
Usp15	1.6332810785233	0.000126359015160126	Up
Cep290	1.62983654209063	0.000146580417962635	Up
Azin1	1.62823524215123	6.64321157407335e-05	Up
Cenpw	1.62721732887003	4.49442817960907e-05	Up
Wdr26	1.62689642979941	3.09166903800899e-05	Up
Bora	1.62334123647804	0.00026458062691745	Up
Wee1	1.62321611426643	0.000206790539056677	Up
Pir	1.62251035419629	0.011899504238094	Up
Prkab1	1.62172594393562	0.00026061086523332	Up
Cep128	1.62008254360644	0.000374215703580715	Up
Mtcp1	1.6168368175554	0.0326600433301261	Up
Tusc1	1.61582180275958	0.0003174922288001	Up
Ptger3	1.61395492280733	0.0243384924794235	Up
Alms1	1.61303466142364	0.00767263744920727	Up
Parvb	1.60877004882481	5.46922359021107e-05	Up
Cdkn2d	1.60639071687535	6.90367265655496e-05	Up
Dnaja4	1.60468921503392	0.00234703399081746	Up
Bcl2l13	1.60422326003837	0.000921097498080357	Up
Gins2	1.60353671782405	0.00285438200382034	Up
Mettl27	1.60326525473024	0.00030769904809467	Up
Brip1os	1.60310476811114	0.000101339239688974	Up
Adrb2	1.60242254425555	0.000894201921558589	Up
Aoc2	1.60226813276141	0.000220707239327833	Up
Suz12	1.60172913180092	0.000134804557384139	Up
Zc3hav1l	1.59966593190606	0.00669458524873886	Up
Acp1	1.59903926836208	0.000179339839064495	Up
Eaf1	1.59844774929947	0.000462430035274915	Up
Pole2	1.59723114832913	0.000952169037833181	Up
Hs6st1	1.59612887779791	0.000691075031023962	Up
Mocs1	1.59544136180086	0.00060778560526007	Up
Rcc1	1.59358816573025	4.20211463424706e-05	Up
Marchf5	1.59326772422426	0.00022078051272243	Up
Kctd7	1.59225052816298	0.000659321183825016	Up
Atg4d	1.59187047384267	0.00155003410901154	Up
Lefty1	1.59051219902341	0.00417697237081979	Up
Mospd1	1.58983840011245	0.000284911050147238	Up
Lin9	1.58923509521269	0.00598492324539029	Up
H3f3a-ps2	1.58879013675333	0.00944891267024628	Up
LOC115487771	1.58790755343075	0.0013139182213836	Up
Prxl2a	1.58469783084212	0.00249618388331055	Up
Ncoa4	1.58330545482317	0.0132511311808277	Up
Mthfd1	1.58254673177923	0.000248244330869689	Up
Prim1	1.5818111649792	0.00045296875308278	Up
Phactr4	1.58090274746622	0.000106062362446126	Up
Rn18s-rs5	1.57966102025154	0.00730427297030408	Up
Ccdc71l	1.57959836097032	0.00113041659307819	Up
Mst1	1.57579072967459	0.0106471502026927	Up
D17H6S56E-5	1.57532295025361	3.6492811882838e-05	Up
Spire1	1.57317527575034	0.00321859534968518	Up
Btg2	1.57271289315742	0.000984051581377716	Up
Frmd4a	1.57174994564639	0.00354250661114272	Up
Ccdc77	1.5695832552268	0.0015441163334211	Up
Sapcd2	1.56445261536124	0.00886113161269386	Up
Cecr2	1.56275585656976	0.000222475756026627	Up
Gse1	1.56114510140681	0.000357448631196866	Up
Cchcr1	1.56023083824437	0.000477731505758828	Up
Agfg2	1.55966976774629	0.000124054970652764	Up
Zfp526	1.5569535079765	0.00445414246851807	Up
Dnase1l1	1.55636713232764	0.00735471612239999	Up
Ago2	1.55570147286053	0.00592404560897086	Up
Zfp800	1.55272973413062	0.000558169887475897	Up
Klhl12	1.55211927795976	0.000879863890748033	Up
Mbnl3	1.55124638982857	0.000144553870830544	Up
Rgs12	1.55101161430285	0.000339177946252128	Up
Ltf	1.55092333068931	0.0267816848939419	Up
Samd1	1.54986802740203	4.15689222254397e-05	Up
Dtymk	1.54925706805059	6.92274637463827e-05	Up
Casp3	1.54871898178889	0.000982955807200027	Up
Nt5dc2	1.54753956359017	0.0013748205434718	Up
Rbbp8	1.54602512770078	0.000351835706236647	Up
Bmp2k	1.54567522533977	0.000179862033445847	Up
Cdkl1	1.54468148619581	0.000888735525157518	Up
Ppp2r1b	1.54297114896296	0.00109432798540128	Up
Elmo3	1.54144982696232	0.00318706889380668	Up
Col8a1	1.53912074884527	0.0484284227897236	Up
Rad51c	1.53176289731972	0.000919608026141656	Up
Ache	1.53153142036608	0.000912926329654113	Up
Snord22	1.53082610081858	0.0293791413831265	Up
Suv39h1	1.53052903046639	8.6031920085707e-05	Up
Tuba4a	1.53018290494023	0.000188411134250256	Up
Ppwd1	1.52689135640926	0.000176157959586705	Up
Slc7a1	1.52566705248902	2.91818298609668e-05	Up
Klhl25	1.52087697070978	0.000506529082243637	Up
Ppp1r15b	1.51972136319505	0.000501974986105871	Up
LOC118567764	1.51968053425298	0.00439757165994085	Up
Wdr76	1.51843980859021	0.000665947277882177	Up
Cdca4	1.51805749768673	0.000585933820812525	Up
Gpx4-ps2	1.51767088241415	7.37230256532785e-05	Up
Iqcd	1.51765269417608	0.0033074071497709	Up
LOC118567910	1.51534620145962	0.0347552387340065	Up
Hipk1	1.51529531618901	0.000527158391739967	Up
Nipa1	1.51392336529992	0.0253939551513353	Up
B3gnt3	1.5119037199316	0.0146765780187488	Up
Chek2	1.50969941393845	0.000106768889561084	Up
Bcorl1	1.5094827846413	2.44363016118452e-05	Up
AW011738	1.50886191533335	0.00226124797246303	Up
Wapl	1.50822768052651	0.000178196732118098	Up
Cbx5	1.50587923411502	0.000119442020941664	Up
Slc29a1	1.50490374324841	0.000124924891353996	Up
Cdk2	1.50451737016219	0.000732931057607708	Up
Reep6	1.50353762714291	0.00349939355697104	Up
Fxn	1.50109894037882	1.02771716809791e-05	Up
Actg2	1.49998343693963	0.00788089395584668	Up
Ibtk	1.49987165487362	0.000218409583338632	Up
Acss1	1.49801252003597	0.000335421755189	Up
Psme3	1.49692469246334	0.000263289002011449	Up
Ssx2ip	1.49563839463635	0.000733648552481538	Up
Haspin	1.4953632621684	0.0042610285958224	Up
LOC115490496	1.4951792895216	0.0452959140111883	Up
Lrrc47	1.49508402216835	1.05145633902738e-06	Up
Clca3a1	1.49502356264312	0.0056684253100748	Up
Cd82	1.49497415943743	0.000384955501720431	Up
Traf4	1.49279005416353	0.00116055100240873	Up
H3c13	1.49266940938084	0.0154430200628253	Up
Rps19-ps4	1.49204633394679	0.035244755795626	Up
Arrb1	1.4914416880373	0.000670733902395692	Up
Dnd1	1.49135629870762	0.00378367481078437	Up
Tlnrd1	1.48540964531895	0.000150831979072511	Up
Usp1	1.48453079978952	0.000827739776057396	Up
Psmd9	1.48314620452161	4.81069729901637e-05	Up
Asf1a	1.48061236098704	0.0319319421550255	Up
Atp2b4	1.47942554760049	0.00208601020574048	Up
Tapt1	1.47670610951814	0.00117913148696	Up
St3gal6	1.47547068160363	0.000430996583000585	Up
Mboat2	1.47374826400764	0.00311546588729414	Up
Slc22a23	1.47348346404494	0.00414696515058028	Up
Brca2	1.47308020703454	0.000431704206008238	Up
C5ar2	1.47206283916972	0.0200180336354021	Up
Ubald2	1.47027328525644	0.000410719418091538	Up
Ell2	1.46767943146528	0.00152460292794168	Up
Gins3	1.46604258522643	0.00265294537831631	Up
Mir7036b	1.46573208749271	0.0408373955174679	Up
Endod1	1.46064344709459	0.00101106283421688	Up
Bnip3l-ps	1.45279075335249	0.0225024044696127	Up
Nudt12	1.45225107221938	0.0383347531785829	Up
Wdr62	1.44843094537193	0.00249246274253865	Up
Lcorl	1.44839852266023	0.00391180159568152	Up
LOC108167594	1.44762863985107	0.00828057882245647	Up
Rnasel	1.44705320449645	0.00053320430482375	Up
LOC118568032	1.4466110636942	0.00138962299726541	Up
Ccdc189	1.44649899480264	0.0249342641356142	Up
Itga5	1.44314765265244	0.000829701407213548	Up
Xrcc2	1.43981128972889	0.0054700124566484	Up
H3f3c	1.43935672496267	0.0395315357200937	Up
Zranb3	1.43917786697725	0.000779979944533623	Up
Abhd5	1.43835696954054	0.00135137014608214	Up
Cit	1.43758295311213	0.000163135966136913	Up
Rfc5	1.43531954205875	0.00374821429149275	Up
Helb	1.43097516142092	0.00122166954875183	Up
Pacsin2	1.43092384769331	0.000965094950065375	Up
Nde1	1.43038319936759	0.00159499779556951	Up
Cenpq	1.42932082740423	0.00179730922456368	Up
Wrn	1.42723177271778	0.00039792609217785	Up
LOC118568158	1.42665225760282	0.0284637995539967	Up
LOC118567736	1.42584324227791	0.000337550578986301	Up
Tmem86b	1.42449392963422	0.000225052649821001	Up
Aff1	1.42441230057628	0.00107188644005444	Up
H4f16	1.42330145870553	0.0366020376534566	Up
Nsd2	1.42258728701268	0.000348407582338401	Up
Timeless	1.4225375870066	5.53172119074473e-05	Up
Xpnpep1	1.42050642672344	0.00103769336165779	Up
Apold1	1.41838591394504	0.00966165142005084	Up
Gcnt7	1.41577520657273	0.0250353022109618	Up
Denn2b	1.41431164242159	0.00165028608771322	Up
Mgll	1.41318544344642	0.000197834949188096	Up
Reep4	1.41123461514905	0.0011628591050132	Up
Supt16	1.41078676732009	0.00239962857927719	Up
Haus6	1.40862121805464	0.00313041970099099	Up
Nxpe4	1.40757699515479	0.000483738884306992	Up
Traip	1.40558551888624	0.00025024849680749	Up
Mettl7a1	1.40105631056653	0.00242842109469027	Up
Parp16	1.40014477450436	0.00591417539804596	Up
Aars	1.39901154830066	0.000563983630083098	Up
Lpin2	1.39570478348848	0.00105293816935768	Up
Mcm8	1.39508181749023	0.00855195419076692	Up
Usp7	1.39126057215783	0.000237809937106851	Up
Htatip2	1.39060708462412	0.00828635250561752	Up
Orc2	1.39044961915402	0.000489797699660639	Up
Josd2	1.38879236534929	0.000179375634692249	Up
P2ry1	1.38627863432516	0.0164981153895905	Up
Cep70	1.38623299501391	0.00106448250335531	Up
Cep57	1.38524977705979	0.00491111441376474	Up
Rpain	1.38316740358328	0.00073378155050091	Up
Arhgef12	1.37992074646407	0.000418155511132953	Up
Nedd1	1.37811532693154	0.00436299784990152	Up
Lysmd3	1.37791974254801	0.00547730858134568	Up
Skp2	1.37633302664609	0.00578643470074799	Up
H2az1	1.37506491079255	0.00119220397265336	Up
Tedc2	1.37352106465625	0.000669263799375746	Up
Fbxl22	1.37262320051289	0.0126293427610018	Up
Atf1	1.36938372088738	0.00153271096438969	Up
Sgk3	1.36886168003625	0.00077553212462032	Up
Dnajb2	1.36885616924557	0.00188409816877295	Up
Golph3l	1.36706072043096	0.00278254714273017	Up
Eri1	1.36410283165987	0.000955825948155158	Up
Pole3	1.36387039551732	0.00011414886927686	Up
Gab1	1.3638541767854	0.00060833634479666	Up
Rccd1	1.36357105686147	8.82076511159275e-05	Up
Tifa	1.36351579393196	0.00250533419361414	Up
Ccp110	1.36138081151497	0.0030704307786303	Up
Nme4	1.36113950509168	0.0088546673987595	Up
Bnip3l	1.36041105273487	0.000618129699696011	Up
Ccdc14	1.36030156666809	0.00119737313267413	Up
Dnajb4	1.35768972887647	0.00667941964438686	Up
Casp2	1.35670767003076	0.00519496083757305	Up
Fam122b	1.35431218046152	0.00490803257317862	Up
Usp37	1.34961989340465	0.00023094617066985	Up
Anxa9	1.3471531199815	0.000658277468648928	Up
Pabpc1	1.34499006740941	0.00134261517955466	Up
Sesn2	1.34465776236566	0.0209537521070936	Up
Gucd1	1.34407546812223	0.0158179315100558	Up
Pxmp2	1.34347633603528	0.00713103921227112	Up
LOC118567856	1.34280360161669	0.00606208575497574	Up
LOC118568201	1.34243985337221	0.00148491797404883	Up
Zfand4	1.3418817734143	0.0217474123696045	Up
Gins4	1.3411944214268	0.00158030947851957	Up
Cdc25a	1.34074976325868	0.000947086774745149	Up
Rbm3-ps	1.3406482899568	0.0289708813071515	Up
Eif4ebp1	1.34061521623933	0.00115573203191599	Up
Tpcn1	1.33950566459542	0.000408241073803515	Up
Cish	1.33882684745134	0.0100375232417018	Up
Serpinb10	1.33868714241489	0.0374677852862044	Up
Siva1	1.33685366252059	0.000547682240226425	Up
Zdhhc14	1.33584099611354	0.000573650508845674	Up
Nscme3l	1.33016042161404	0.0285753662857353	Up
Eef2k	1.32754980224899	0.00104952714268549	Up
Cdk6	1.32753624051546	1.53427776081901e-05	Up
Bola3	1.32675575522616	0.000877130652267791	Up
Zbtb44	1.32553790925177	0.00213465038262467	Up
Cdc42ep4	1.32511914594659	0.00142619083208014	Up
Snx15	1.32357682260849	0.000391354276918824	Up
Pola2	1.32280234541776	0.00179100450288946	Up
Dcun1d1	1.31827512039739	0.000519853546033221	Up
Rnf26	1.31724385380305	0.00381293861749847	Up
Hat1	1.31608210039841	0.000450830999028249	Up
Itpripl1	1.31233246096651	0.0115103421231534	Up
Itsn1	1.31218746704198	0.00222447941346151	Up
Svip	1.31216986890686	0.00532631771099421	Up
Rfc3	1.31193048183703	0.00241488655251896	Up
Rnf19a	1.31132170949874	0.00709717408220238	Up
Mafg	1.31073884117534	0.000697344865805885	Up
Taf5	1.30953179720307	0.00620028055348051	Up
Adipor1	1.30570479976453	0.00200283752754679	Up
Mxi1	1.30553667773321	0.00125609030488616	Up
Kctd14	1.30511600665119	0.000504996121376039	Up
Cdc42ep3	1.30480185468914	0.000746762557597922	Up
Cmc2	1.3031649461104	0.000357796300413539	Up
Mad2l1bp	1.30278781014504	0.00618209501865607	Up
Zfp874a	1.30236177685833	0.0154835649098471	Up
Lrrc20	1.30189960129843	0.000888671607271574	Up
Bsg	1.30170810808689	0.00208881599913932	Up
Carnmt1	1.29933930943076	0.000732001365069874	Up
Usp45	1.29817563604395	0.00459703541163371	Up
Iqgap2	1.29609917349133	0.00436323984230733	Up
Otud5	1.29505068065627	0.00382868505784156	Up
Mfsd12	1.29391525175857	0.00389127722174431	Up
Rps6-ps4	1.29337948137461	0.00232693888347645	Up
Stag3	1.29264640685706	0.0134284360140749	Up
Lyrm4	1.29230720538182	0.000313218912487178	Up
Zbed4	1.2916726785207	0.00126127474702546	Up
Crat	1.28743422391926	0.00166673965461755	Up
Rpia	1.28606509241694	0.000390637628896434	Up
Poc1a	1.28517418898037	0.000991041670771807	Up
Slc41a3	1.2851242472641	0.000924247571597763	Up
Mis12	1.28441530619911	0.00413434379095223	Up
Mtbp	1.28410257089388	0.0152748333416023	Up
Dleu2	1.28408515649718	0.000355971393602249	Up
Fntb	1.28372617115076	0.00131589756304614	Up
Golm1	1.27988167859353	0.00455440623160521	Up
Acer3	1.27547969047523	0.00264036306467484	Up
Gp9	1.27301360269987	0.00467140816471773	Up
Gpcpd1	1.27138880137059	0.000914478003123772	Up
Nudt5	1.26803239990043	0.00582617589287629	Up
Mfhas1	1.2668156372445	0.000206542632167058	Up
Oaz1-ps	1.26546233252342	0.00140389396492737	Up
Sp3	1.26498074307272	0.00100042888738252	Up
F10	1.26460472138753	0.0286539666772284	Up
Hcfc1	1.26359948764621	0.00164965889787574	Up
Haus4	1.26230767701699	0.00680874729265138	Up
Palb2	1.26222682577154	0.0123486924987048	Up
Srsf10	1.26194062580817	0.000922908340418481	Up
Pcyt1b	1.26188291697045	0.0085168590413237	Up
Lsm2	1.26008465014157	0.0034785321826964	Up
Ssbp3	1.2595074111833	0.000167550177337481	Up
Osbpl8	1.25754506155273	0.00194554091184031	Up
Capn5	1.25668858071775	0.00692407608713008	Up
Dtwd1	1.25590257465937	0.00994033750922056	Up
Slc23a1	1.25531783409632	0.0168249856903077	Up
Rprd1b	1.25463052254175	0.0019517996643869	Up
B3galnt2	1.24776996242414	0.00190212313525986	Up
LOC115490354	1.24756807569836	0.0222115400300415	Up
Cenps	1.24651698158167	0.00348258054263295	Up
Tm7sf3	1.24602200421013	0.0037168942832723	Up
Phlpp2	1.24417359973347	0.000551428739148132	Up
Pidd1	1.24338483997298	0.00860540154463332	Up
Trim56	1.24325960237242	0.00917280496815101	Up
Rpsa-ps2	1.24265529743922	0.00588871136583405	Up
Cgas	1.24226390415483	0.0165076777890712	Up
Cramp1l	1.24115232016575	0.000550251233777145	Up
Hspb6	1.24068790650479	0.00746249303880468	Up
Heatr5a	1.23839926280343	0.00582915986485407	Up
Ift80	1.23828539650827	0.00461125793419165	Up
Grina	1.23630898707591	0.00277721635742963	Up
Spopl	1.23377195325229	0.000527575835800669	Up
Bcl2l15	1.23347466284455	0.0384815222535752	Up
Ptgr1	1.23331816052863	0.00906659268552221	Up
Alkbh5	1.23268504602047	0.000327294914552147	Up
Ccdc138	1.23167015325279	0.00834997799864054	Up
Tmx1	1.23047985435554	0.00127643572089958	Up
Tubb4b	1.23023783150957	0.00566000185760309	Up
St6galnac3	1.22986596479013	0.00188948649883729	Up
Clp1	1.22676106709275	0.00934743551686705	Up
Orc5	1.22640982241885	0.00145509114971714	Up
Med18	1.22632719894623	0.00972157901722115	Up
Atf4	1.22625616492268	0.0017294766471401	Up
TrnH	1.22359426379997	0.0285859520692304	Up
Hectd4	1.22307843882442	0.00622609254759228	Up
Hp	1.22295380212256	0.0269435012882113	Up
Rnf123	1.22107460695885	0.00672966855100136	Up
Mdc1	1.21885571244508	0.000824886923827464	Up
Fancl	1.21762351353281	0.00915520480915587	Up
Slc30a9	1.21634609717806	0.00139615807276619	Up
Alyref	1.21511235349623	0.00250236334809205	Up
Gtpbp2	1.21500093207135	0.00312599825617059	Up
Comt	1.21408591857597	0.000982682646826323	Up
Mis18a	1.21377190749138	0.00767780314707735	Up
Cast	1.2132314878848	0.0024781719081882	Up
Slc16a6	1.21199362032512	0.0148077237592274	Up
Paxip1	1.2109053143672	0.00176440478589577	Up
Gpx4	1.20970873426714	0.000307392322236058	Up
Rabgef1	1.20897357323737	0.00354396600363819	Up
Fcho2	1.20890145995326	0.00301400253432261	Up
Noct	1.20801562726958	0.0215282416616715	Up
Ggnbp2os	1.20762705081385	0.00260545714178462	Up
Cd5l	1.20415602822923	0.0133125853764971	Up
Fbxo34	1.20379405239264	0.0041213227163919	Up
Cep85	1.20322568919625	0.00696824878164246	Up
Col5a1	1.20093696220268	0.00424513779970138	Up
Shc1	1.19919772430158	0.00530736254179898	Up
Cenpc1	1.19735725556974	0.00349330714491769	Up
St3gal2	1.19659313255761	0.00356641300118114	Up
Myb	1.19655987253433	0.00399449375838647	Up
Pik3r1	1.19463224147298	0.00173406459406203	Up
Cep295	1.19441978570738	0.00183927855398736	Up
Apeh	1.19394746476648	0.0162959346726845	Up
Plaat3	1.1912822530496	0.00330418804064074	Up
Mllt3	1.19102616096888	0.001892950463861	Up
Ckap5	1.1890039423943	0.00166955670688915	Up
Dcaf6	1.18823620340595	0.00280668151726724	Up
Ikzf5	1.18809842526763	0.00111686803119793	Up
Rassf7	1.18564844155927	0.0243089526083903	Up
Rfesd	1.18543772583499	0.0267464063299473	Up
Fbxo42	1.18457928726621	0.00357820381439117	Up
Anp32b	1.18226576611993	0.00111490581414207	Up
Dhrs4	1.18161516640228	0.00312283599700828	Up
Med13l	1.18064355264633	0.0026963244906404	Up
Copz1	1.17861810915471	0.000466415400143587	Up
H2-T24	1.17811668757909	0.00086065782567965	Up
Npat	1.17776547181328	0.0089840144988545	Up
Serinc3	1.17716223522724	0.0088347550970977	Up
Wdr81	1.17713021019128	0.00316199219512928	Up
Fam234b	1.17594510638312	0.0165078665513975	Up
Vcl	1.17587818153591	0.00269440123076198	Up
Tmtc3	1.17586659717614	0.0342708326736102	Up
Mier1	1.17571044928208	0.0019470291572709	Up
Ncoa7	1.17536668629728	0.00732620747130663	Up
Hacd1	1.17401460207584	0.00468270304422992	Up
Rbm15	1.17384597870708	0.000112701888214602	Up
Top1	1.17280152795643	0.00261846072971277	Up
Tmem256	1.17093613838218	0.000506064903178656	Up
Dnmt1	1.1690370228791	0.00312396081513763	Up
Glo1	1.16804700610299	0.00234273355838127	Up
Yipf4	1.16564342486677	0.00233081977228326	Up
Shmt2	1.16532827238884	0.00216044256753892	Up
Bach1	1.16368111116715	0.0127807070180531	Up
Hipk2	1.16354159130097	0.00102459024862602	Up
Etaa1	1.16254879237116	0.0252307066388965	Up
Nucks1	1.15901654844953	0.000522023213764556	Up
Svbp	1.15876999229445	0.00226207739050215	Up
Ndc1	1.1560602528218	0.00635056509619835	Up
Atg4b	1.15545753765179	0.000946515708567985	Up
Alg10b	1.15493506121706	0.0478568277784202	Up
Kif2a	1.15466228428741	0.0071414044273011	Up
Hmgb1-ps2	1.1544665659275	0.0155931054581794	Up
Ankrd54	1.15247217981578	0.00838984028829252	Up
Kdm7a	1.15247101470748	0.00335087736303174	Up
Slc30a1	1.15136756305965	0.00512165536756396	Up
Dnajb1	1.14987047577514	0.00418081678043229	Up
Casp8ap2	1.14859174031901	0.00405719403604102	Up
Rnf10	1.14854516665149	0.00586304941908849	Up
Plekhf2	1.14745749650015	0.0370026240640403	Up
Macir	1.14183233167193	0.00514718434331831	Up
Sirt1	1.14041503980357	0.0113322483018554	Up
Zcchc3	1.13940715380758	0.00569474072973138	Up
Hif3a	1.13853501741374	0.0103111841659446	Up
Mppe1	1.13842564569553	0.0264367040871606	Up
Necap2	1.13607429069759	0.00526451961871451	Up
Pon2	1.13511763493134	0.00284339411975782	Up
Ptpa	1.13331791472608	0.0013657951009002	Up
LOC115488769	1.13244222512483	0.0160588970909526	Up
Ipp	1.13198217117501	0.00860667287599515	Up
Btaf1	1.13182918084832	0.00298727666665872	Up
Nrf1	1.12950398211172	0.00239266858273902	Up
Suco	1.12880762124663	0.00251655809527642	Up
Spats1	1.12838030926089	0.0269265518666195	Up
Kctd9	1.12757057755645	0.0205898971933641	Up
Uevld	1.12727188838784	0.00256202532169524	Up
Tspo	1.12696127738483	0.0125446112637648	Up
Scly	1.12591068164868	0.00906436210500115	Up
Prkaa1	1.12583307720183	0.0136310250085587	Up
Plpp1	1.12413955679866	0.011431564278327	Up
Rngtt	1.12347090240645	0.00288908678229581	Up
Rif1	1.12324270074053	0.000569200156816702	Up
Sord	1.12095308218457	0.0045290982788579	Up
Cdkn1b	1.11821866518479	0.00600776294868219	Up
Hars	1.11799594315987	0.00892741539237649	Up
Pmf1	1.11782391699995	0.00234838652996378	Up
Abcb7	1.11754294492362	0.00336767480841498	Up
Cdca7l	1.11675225110709	0.0481361008257622	Up
Tmem9	1.11439584675546	0.0119868518501694	Up
Gtf2a1	1.11394828454133	0.00122451865903655	Up
Ciao2a	1.11360626350446	0.00408816714678752	Up
Josd1	1.11231589568881	0.00572410359258501	Up
Itga4	1.11225071928316	0.00490101878493981	Up
Larp1b	1.11129092496768	0.0021790468965072	Up
Relt	1.11101051646582	0.00860612793959457	Up
Tmed2	1.11011348651343	0.00620227720951056	Up
Cnnm2	1.10936026428982	0.0139155851206908	Up
Pfkfb2	1.10927009603958	0.00269500797138091	Up
Grtp1	1.10772318765085	0.00815466592295208	Up
Rint1	1.10673402201766	0.000608526681538089	Up
Oip5os1	1.10648232277914	0.0123849168980946	Up
Prpf18	1.10608420735481	0.00143424596879053	Up
Smc3	1.10487611016615	0.000849792354611963	Up
Psmd5	1.10475299697727	0.00491912920250784	Up
Nxt1	1.10252401543394	0.01764229927455	Up
Ppp1cb	1.10207772920281	0.00885680007112036	Up
B3glct	1.10170237873996	0.0157135441593287	Up
AA386476	1.10111888720098	0.032886347831192	Up
Atl2	1.10096823616821	0.00393011427814696	Up
Dnttip1	1.10025136597432	0.00226319099207868	Up
Resf1	1.0995833128625	0.0147983705210224	Up
Apex2	1.09865963200961	0.0198198494118277	Up
Wnk1	1.09618470768851	0.00465407954722083	Up
Ccdc74a	1.09590045910311	0.0386602706799771	Up
Khsrp	1.09557308394533	0.00272543623508699	Up
Nup50	1.09371232534045	0.00374284362531344	Up
Cd36	1.09370595739944	0.00845252215453229	Up
Galnt10	1.09305625173135	0.0140174705456648	Up
Dcaf10	1.09282673499015	0.00683165659581994	Up
Dynlt1a	1.09002759521714	0.0306530156126724	Up
Ccdc6	1.08977032105035	0.0101920209920645	Up
Med7	1.08939733384008	0.0161983080649289	Up
H2bc21	1.08783246847706	0.015173034840518	Up
Asap1	1.08763141621191	0.00425526263451369	Up
Nasp	1.08758022245051	0.0009810453925351	Up
Pot1a	1.08631786844902	0.00908095115780402	Up
Cnep1r1	1.08496226751409	0.00187821760047049	Up
Hspd1-ps3	1.08153091423059	0.00151722613750286	Up
Vamp8	1.08053185189683	0.00282639703572482	Up
Zfand6	1.08015637435949	0.00421275785803706	Up
Pdik1l	1.08014651398692	0.0342453932676257	Up
Spata24	1.07902129784658	0.0101552993358541	Up
Cenpt	1.07885539466225	0.0067420778297777	Up
Isca2	1.07734672582758	0.00278265399361744	Up
Rbbp4	1.07727133448605	0.00144707348218053	Up
Tuba1b	1.07511909518161	0.00114365949822096	Up
Clcn2	1.07393581251357	0.0429229228822223	Up
Mzt1	1.07391693259598	0.00286168342074494	Up
Fpgs	1.07249852491518	0.00242448987129589	Up
Sav1	1.07203881106421	0.0256028450560648	Up
Phf10	1.07168205196508	0.00631899680802945	Up
LOC115489130	1.07124418918214	0.0150839557441374	Up
Amd2	1.07032420004938	0.0213502591713417	Up
Map3k6	1.06869887488065	0.038835272578595	Up
Zbtb14	1.06832629912535	0.00923032194119113	Up
Hspbap1	1.06717104660826	0.0109784586551731	Up
B4galt1	1.06706219262277	0.0181969959211741	Up
Nup85	1.0638426838677	0.00343399456183124	Up
Mtmr3	1.06347654482158	0.00886104830377441	Up
Anp32e	1.06328775356573	0.00178459994195139	Up
Nrip1	1.06131777072468	0.00266253039381419	Up
Wdr90	1.06103458070578	0.0168165602385995	Up
Hmgn2	1.06070059753715	0.00485323098101426	Up
Armc9	1.05968875993979	0.00110452391786448	Up
Ddx19a	1.05929234851975	0.0116375836663033	Up
Uhrf1bp1	1.05917860898969	0.0321840765526828	Up
Eri2	1.05637607396842	0.0373590786229238	Up
Hells	1.05556101499284	0.00451475967062519	Up
Pds5a	1.05511226183921	0.0124679129251472	Up
Rab8b	1.05108586644013	0.00272933227078607	Up
Cyb5a	1.05096718833086	0.00261618793811948	Up
Cep350	1.05063821881976	0.00483403799993296	Up
F2rl2	1.04959695036294	0.0266170484357145	Up
Unc5cl	1.04879612625296	0.0164088372273416	Up
Tor1aip2	1.04835961898575	0.00891871017967291	Up
Rps27l	1.04682542908701	0.0144783191535443	Up
Fam120a	1.04609789981179	0.00566001876445146	Up
Dars2	1.04509089104908	0.0252410023770717	Up
Ulk1	1.04220856231021	0.00771252442762159	Up
Herc1	1.0409987114247	0.013742048536352	Up
Btrc	1.04080076537171	0.0052290155811492	Up
Nudt9	1.0389088495688	0.0121671077142294	Up
Ppbp	1.03787970884909	0.0106166786345204	Up
Foxd2os	1.03753723434856	0.0187908894022977	Up
Oaz1	1.03740204943396	0.00341399644369857	Up
Rnf38	1.03672590338312	0.00891803141798846	Up
Smarca5	1.03578357704303	0.00489253096495518	Up
Nup133	1.03488829291303	0.0200172085089858	Up
Nutf2-ps1	1.03466499321023	0.0199607572170656	Up
Sp4	1.03403410675964	0.0156836844381801	Up
Bud31	1.03374737297577	0.0201729631537047	Up
Larp4b	1.03368392302932	0.00166943896318133	Up
Foxo4	1.03275771795145	0.00896403821135562	Up
Tcea1	1.03220731493083	0.00238160520614366	Up
Pex12	1.03142594180715	0.0184829922151265	Up
Xpo1	1.03116216178961	0.013564766109603	Up
Tceal8	1.03025920511083	0.0123727052132396	Up
Cetn4	1.02999999788222	0.0262597524716008	Up
Rmc1	1.02967831465986	0.04429503200694	Up
Dhrs13	1.02892089472641	0.0185788675623477	Up
Rbm14	1.02889545981504	0.00896871898475007	Up
Ahctf1	1.02818610576674	0.0224632485246396	Up
Zdhhc5	1.02712802975586	0.029423526470456	Up
Tmem69	1.02480730534759	0.000412803655706538	Up
Nfatc2ip	1.02405209751005	0.0160732626329333	Up
Arrdc3	1.02389833663477	0.00175576999921526	Up
Cat	1.02388103988754	0.0215837488666684	Up
Fbxo3	1.02262318496113	0.00440078204158322	Up
Kpnb1	1.02211334830356	0.00841858304834203	Up
Ppp2r5b	1.02117392937391	0.0261262968237958	Up
Slc16a3	1.02113131110237	0.0183906976535945	Up
Dedd2	1.02061346149989	0.0171942546658771	Up
Nup153	1.01943421515674	0.0152292332470022	Up
Tbc1d31	1.01922915597261	0.0197605793520683	Up
Agpat4	1.01790135526797	0.0022564217076677	Up
Mir22hg	1.01782161022052	0.0359509295818439	Up
Vrk1	1.01605070089382	0.00520430555252438	Up
Slc38a9	1.01456701644316	0.00680783742604024	Up
Slc25a40	1.01420453732219	0.0101289808876145	Up
Abtb1	1.01330698934525	0.0111924876020097	Up
Cdc7	1.01048389843225	0.0178877067729137	Up
Tulp2	1.00966699181671	0.0215896499971059	Up
Frat2	1.0094027012135	0.0158057626806547	Up
Donson	1.00532354040087	0.0195126597801142	Up
Eif3j1	1.00495128930427	0.0176877829897808	Up
Ipmk	1.00460489098748	0.00325408040724897	Up
Pbrm1	1.00458336287645	0.00291313926483742	Up
Slc48a1	1.00297690222784	0.0137495365748032	Up
Ints2	1.00176350811314	0.0230120395580471	Up
Zfp410	1.00102499334697	0.00909052899222779	Up
Ces2g	4.47511	1.52613868456055e-14	Up
Epor	4.2704	4.29625717982918e-16	Up
Ckap2l	3.2051	2.66417170972282e-11	Up
Cox6b2	3.17054	1.41115355812068e-11	Up
H1f3	2.55286	0.000148283205321002	Up
Xk	2.51138	2.65542783229941e-05	Up
Anln	2.45388	5.70420794783402e-07	Up
Cd177	1.89696	0.00704625944131437	Up
Slc25a39	1.66215	2.75497956522476e-05	Up
Adcy6	1.62492	0.000155520939455959	Up
Mt2	1.56448	0.000130591247420203	Up
Fancm	1.44996	0.00734787661171789	Up
Tmem250-ps	1.09854	0.000202070684002908	Up
Slfn8	-1.00101	0.00694311723925857	Down
Kcnj16	-1.00164	0.0254315232788952	Down
Cdh4	-1.00255	0.0322717936941079	Down
Ankrd55	-1.00346	0.0484116463139266	Down
Phf11a	-1.00948	0.0110100712076778	Down
Cplx2	-1.01157	0.0430499290188013	Down
LOC100861738	-1.01209	0.0287650543425878	Down
Hmgb1-ps5	-1.01404	0.0241044509212245	Down
Carmil2	-1.01442	0.00246709406258611	Down
Hoxb4	-1.01515	0.00719600028102462	Down
Xylt1	-1.01552	0.0209201852013563	Down
Plcxd2	-1.01918	0.0229184879924914	Down
Asic1	-1.01975	0.0426628170160355	Down
Sema4g	-1.02056	0.0490318663127507	Down
Arhgap45	-1.02196	0.00303437052852897	Down
Ptchd1	-1.02429	0.0316476991233167	Down
Rab3c	-1.02615	0.0291587133969651	Down
Tmem179	-1.02954	0.0427066790132521	Down
Icam5	-1.03445	0.0455538430288487	Down
Cyp4f18	-1.03492	0.0151020183237942	Down
Arhgap4	-1.03758	0.00730260106071325	Down
Fcmr	-1.04069	0.0129343648315987	Down
Rims4	-1.04102	0.048343397964389	Down
Pacsin3	-1.04854	0.0455176338376529	Down
Pak6	-1.04927	0.0434850643245468	Down
Pth1r	-1.05043	0.0158158070453936	Down
Rnd2	-1.05374	0.0498376027955275	Down
Cd96	-1.05462	0.014389621357881	Down
Phf14	-1.05913	0.000903916390435544	Down
Pisd-ps1	-1.05983	0.00324727338264003	Down
Prkce	-1.06284	0.0135975133770419	Down
Slc6a7	-1.06289	0.0322450132213813	Down
Tnnt2	-1.06341	0.02188017211441	Down
Nrros	-1.06348	0.00440225832766659	Down
Gprasp2	-1.06558	0.049315596349159	Down
Mdga2	-1.06601	0.0426888241187124	Down
Trpc1	-1.06643	0.0385001081296845	Down
Cwf19l2	-1.06733	0.00183337325204132	Down
Tnfrsf22	-1.06744	0.0106739878121674	Down
Phf11b	-1.07407	0.0101445436233372	Down
Ptpro	-1.07487	0.0125370181321876	Down
Elfn1	-1.0758	0.0492659130720175	Down
Slc28a2b	-1.07752	0.0353348982360244	Down
Zfp423	-1.08029	0.0416331233061605	Down
Scrt1	-1.08114	0.0382406318336824	Down
Pnmal2	-1.0823	0.0399324093378355	Down
AA414768	-1.08497	0.0151691810317822	Down
Armc3	-1.08735	0.0267411589164757	Down
Srpk3	-1.08751	0.00878009501935138	Down
Ppfia4	-1.09112	0.00722835185335017	Down
Bc1	-1.09165	0.0107758493708088	Down
Sec31b	-1.09639	0.0474789742799169	Down
Sox11	-1.097	0.0276146873959733	Down
Cd3g	-1.10072	0.00127393097817282	Down
Atp1a2	-1.10135	0.0257399062979244	Down
Tmem130	-1.10157	0.0394223568527218	Down
Cyp26b1	-1.10377	0.0388663631907702	Down
Hes5	-1.10378	0.0179972546209439	Down
Fxyd6	-1.1049	0.0324179487341572	Down
Tshz2	-1.10662	0.00266407099788672	Down
Fam124a	-1.10717	0.0157171458430536	Down
Map7d2	-1.10906	0.0438038193112824	Down
Tecpr1	-1.1099	0.00388947856363179	Down
Pgam1-ps2	-1.11027	0.01523341436016	Down
Elavl3	-1.11147	0.0364642394733894	Down
Shd	-1.11172	0.0419543526590277	Down
Hmgcll1	-1.1153	0.0441112013767709	Down
LOC118567599	-1.11771	0.0273449959316985	Down
Nhs	-1.11813	0.0377785435082003	Down
Plat	-1.11954	0.0463516748231104	Down
Fbxl7	-1.11988	0.0456501243333163	Down
Gpr137c	-1.12012	0.0471998727772213	Down
Resp18	-1.12238	0.0243174757718876	Down
Ccn3	-1.12582	0.0435025831415212	Down
LOC118567340	-1.12649	0.0403999258660891	Down
Kcna2	-1.12729	0.0114648738617792	Down
Tnni3	-1.12749	0.00301833046575733	Down
Amn	-1.12858	0.0270963279084479	Down
Zfp30	-1.12878	0.0250380240734675	Down
Catsperg1	-1.12915	0.0176997156140883	Down
Ifi206	-1.13141	0.00277695416075902	Down
Ifi27l2a	-1.13422	0.0302605700164513	Down
Hivep2	-1.13936	0.00233919747616552	Down
Eya2	-1.14167	0.0256790524760492	Down
Chga	-1.14428	0.0278583519471686	Down
Klhl36	-1.14465	0.00301687527155609	Down
Acap1	-1.15116	0.00472682017683757	Down
Ifi214	-1.15351	0.0336505396552557	Down
Plch2	-1.15693	0.0351435999434425	Down
Chgb	-1.15721	0.0372684646751488	Down
Zc3h6	-1.16158	0.00876812036838036	Down
Inpp1	-1.16273	0.00150953782349031	Down
Cdh22	-1.16873	0.0224913344018497	Down
Agt	-1.16879	0.0384628197333377	Down
Zfp827	-1.16919	0.00316656217621234	Down
C1ql1	-1.17023	0.0403120248358693	Down
Ms4a4c	-1.17119	0.00368376375300569	Down
LOC118568526	-1.17323	0.00632192710624365	Down
Als2cl	-1.1741	0.010450449226572	Down
Lcn4	-1.17659	0.0466916328747448	Down
Ebf1	-1.17713	0.00654985014060792	Down
Cers4	-1.17842	0.00062178424808116	Down
Ifi208	-1.18207	0.0039506461179458	Down
Mgp	-1.18586	0.00449423667860806	Down
Nrip2	-1.18647	0.0288832649664069	Down
Trim5	-1.18939	0.00459335974374608	Down
Frrs1l	-1.19325	0.0466085037562324	Down
Xkr6	-1.19434	0.0284804938194121	Down
Kcnk3	-1.19484	0.0109821327468036	Down
Macroh2a2	-1.2003	0.0329880104640253	Down
Gpr85	-1.20242	0.0496448037866536	Down
Ttc30b	-1.20507	0.0449290657913597	Down
Ggt1	-1.2091	0.0102622751764176	Down
Cys1	-1.21212	0.0338666821180497	Down
Lpl	-1.22087	0.00291006219549621	Down
Myzap	-1.22265	0.0217166048987297	Down
Mir5107	-1.22307	0.0190122068507378	Down
Arxes2	-1.2237	0.0215282368435131	Down
BE692007	-1.22551	0.00131787430329776	Down
Itpr2	-1.23223	0.000696420562461496	Down
H2-M2	-1.2372	0.0030405586694196	Down
Pde9a	-1.24146	0.0374911156542032	Down
Slc17a6	-1.24602	0.0468550907267674	Down
Pygo1	-1.25104	0.0171752922705375	Down
Tcerg1l	-1.25153	0.0375166759430385	Down
Tafa2	-1.25294	0.0362491265481694	Down
Fign	-1.25432	0.0172990780779031	Down
Eps8l2	-1.25813	0.0245708416311806	Down
Rac3	-1.25875	0.00373273459758842	Down
Arhgef28	-1.25897	0.0271585367633412	Down
Myh14	-1.26736	0.0407749649625935	Down
Raver2	-1.26823	0.0446167872586534	Down
Syt2	-1.27422	0.0487711129503094	Down
Tbata	-1.27586	0.0498459964508388	Down
Gabra2	-1.27626	0.00690397729250276	Down
Stra6	-1.278	0.00533320323247647	Down
C2cd4c	-1.28133	0.0230207780528198	Down
Klra13-ps	-1.28655	0.0156041779850269	Down
Spata33	-1.29192	0.040117770398625	Down
Slc6a11	-1.29193	0.0293882749879012	Down
Usp27x	-1.2925	0.00884495947562535	Down
Adam33	-1.29398	0.000229215328114921	Down
Rorc	-1.29578	0.0469496020900622	Down
Tmem132c	-1.30134	0.035472067054249	Down
Epha5	-1.30622	0.0358832258825078	Down
Grm1	-1.31634	0.0196343629669187	Down
Atad3aos	-1.33099	0.032761187386373	Down
Pgpep1l	-1.33377	0.0176397375814984	Down
Klhdc8a	-1.3359	0.0328402203146774	Down
Pla2g4f	-1.34326	0.0448848473589918	Down
Chd7	-1.34518	0.00123164208452507	Down
LOC118568405	-1.34808	0.00453868833133562	Down
Prg3	-1.35835	0.00717498248136822	Down
Cpne4	-1.36858	0.0497383460311966	Down
Npas3	-1.37183	0.0126299545638851	Down
Kcnip1	-1.38019	0.0469444957416537	Down
Mx2	-1.38487	0.0233724590513682	Down
Armc2	-1.38776	0.0199665327419052	Down
Ck-ps3	-1.3916	0.0073852443691861	Down
Mmp24	-1.39891	0.0416698649302559	Down
Rgs17	-1.40319	0.0119664143171023	Down
Shisa8	-1.40468	0.00467130902076237	Down
Lor	-1.40879	0.010598757108069	Down
Kcnk12	-1.41265	0.0318645540070237	Down
Cntnap2	-1.41486	0.0395947471254161	Down
Klhl33	-1.41747	0.0232684194170352	Down
Krt77	-1.42542	0.0413021951990849	Down
Caln1	-1.42985	0.0113978967418252	Down
LOC118568558	-1.4314	0.00975580810808075	Down
Trmt9b	-1.433	0.0364055280746385	Down
Ifit3	-1.43405	0.0183906008732486	Down
Htr1a	-1.45461	0.0393818097963142	Down
Cx3cr1	-1.45552	4.039297882164e-05	Down
Nos1	-1.45789	0.00567352452081633	Down
Pabpc1l	-1.45836	0.0205825139137183	Down
Slc25a29	-1.46285	0.00407531466935234	Down
Rpgrip1	-1.46528	5.70790642229055e-05	Down
Zfp811	-1.46769	0.00732900443227087	Down
Lypd1	-1.46778	0.0294945019210585	Down
Pde11a	-1.46943	0.0052033074318211	Down
LOC118567915	-1.47672	0.0163381483146839	Down
Klhl4	-1.49018	0.031255586018579	Down
Gpr171	-1.50327	0.00503077364540465	Down
Cntn6	-1.5044	0.0428674237263879	Down
Klhdc7a	-1.50859	0.0339040623176923	Down
Wfikkn2	-1.51086	0.0238057591058708	Down
Xlr3b	-1.51565	0.00578057867585455	Down
Mir124-2hg	-1.51665	0.0362883623121861	Down
Mmp16	-1.52186	0.0439541968027761	Down
Mrap2	-1.52439	0.0350719658834102	Down
Dapl1	-1.52553	0.00271535259139256	Down
Unc5c	-1.52778	0.0245034182873722	Down
Dbpht2	-1.54209	0.0291398045316685	Down
Epha6	-1.54452	0.0261509949412462	Down
Gprc5c	-1.55074	0.00515216887979915	Down
Cd55os	-1.55634	0.00201065272281519	Down
LOC118568607	-1.55779	0.0305388760863512	Down
Gpr61	-1.56939	0.0326399446513623	Down
Steap2	-1.57608	0.0156929139895686	Down
Pax5	-1.57765	8.48786946204823e-05	Down
Igsf10	-1.57982	0.0317769043050706	Down
Fos	-1.58418	0.00128008821661537	Down
Dlx1as	-1.58763	0.0499362119408261	Down
Il20rb	-1.58783	0.0262284452428682	Down
Grm4	-1.58868	0.0375516670624606	Down
Pcdhgb4	-1.58874	0.0163233923821801	Down
Pax6	-1.58918	0.038379800731015	Down
Nudt11	-1.59676	0.0165697973025461	Down
Mycn	-1.62388	0.0405082400420177	Down
Hcn4	-1.62544	0.0363803392876641	Down
Dcx	-1.6341	0.0485921379967977	Down
Tnnt3	-1.65371	0.0191904146709954	Down
Msln	-1.67738	0.0311068798324456	Down
Myh7	-1.68093	0.0192688256029045	Down
Aire	-1.68286	0.00162143481046516	Down
LOC102637792	-1.69355	0.0012037181992679	Down
Ifit3b	-1.70331	0.0129159277581845	Down
B3gnt9	-1.70751	0.0177903711442767	Down
Enkur	-1.71096	0.0470549810186468	Down
LOC118568138	-1.71297	0.0489582964601859	Down
LOC118568536	-1.72074	0.0150302957546756	Down
Spp1	-1.76965	0.0176303504173516	Down
BC023105	-1.77	0.0245713461753977	Down
Cntnap5b	-1.78823	0.0126344461136168	Down
Tmem266	-1.83249	0.0422289397371362	Down
Cnga1	-1.84184	0.00241404570074874	Down
Arhgap36	-1.87709	0.0186053795404817	Down
LOC118568776	-1.93712	0.00158963974345692	Down
Kcnk10	-1.95879	0.0189850861413939	Down
Slc26a4	-1.97861	0.0250430681222267	Down
Xkr7	-2.0255	0.0159155568449972	Down
Atg9b	-2.08415	0.00234593988306709	Down
AF357359	-2.10753	0.0183862213362542	Down
Mybpc2	-2.11069	0.00052908107705732	Down
LOC118568428	-2.19981	0.00806068429608821	Down
Crtam	-2.21421	0.000129862757615361	Down
LOC118568205	-2.26418	0.00281737834852543	Down
Sytl5	-2.32061	0.00851321360445947	Down
Rpl36-ps3	-2.68512	0.0296523810729053	Down
Pomc	-3.10434	0.0249331363044687	Down
Tubb4b-ps2	-3.45556	0.0171078359763143	Down

## Sheet: Table S1-testis
geneID	log2(fold change)	p-value	Regulation
Ear-ps12	1.9277558857424	0.00446615395742754	Up
Serpina1b	1.91780555674185	0.001754868907076	Up
Rpl31-ps6	1.65445297127504	0.0223192822120109	Up
Neurog3	1.56711614650347	0.0186859457484081	Up
Snord49a	1.5324253747378	0.030140845383045	Up
Klk1b22	1.51431478711356	0.0137972433198831	Up
Fbxl8	1.48310383948902	0.00439343837011106	Up
Themis	1.42738851926421	0.0233568036069377	Up
Cd3g	1.41926310909094	0.0357664784427223	Up
Saa3	1.40291367280549	0.0254993648595916	Up
Rps2-ps9	1.37539745943736	0.0303192379547358	Up
P2ry12	1.32613038708139	0.0256807786768393	Up
Slc39a5	1.30724255954972	0.00112689472193065	Up
Panx3	1.26980405642992	0.024349787714003	Up
Mrgprb2	1.25365945525468	0.0390450416469294	Up
LOC118568041	1.24718634374291	0.0119391021902153	Up
Slfn10-ps	1.22009946336814	0.0234278696725112	Up
Asphd2	1.1880531045073	0.0344781285708039	Up
Lrp8os3	1.18370685956258	0.0354756462812363	Up
Btf3-ps4	1.17849826077939	0.0446376575023591	Up
LOC118567820	1.16845650413271	0.0168669839061621	Up
Otx1	1.16491552501803	0.0096866110360924	Up
Atp5k-ps2	1.1306898429299	0.00479176909694383	Up
LOC115489710	1.09812656529337	0.0384607555139094	Up
Nrp	1.09397691028176	0.000252103962131674	Up
Tcte3	1.08988319689797	0.00546888447677953	Up
Spp1	1.06771100139143	0.0430160578608666	Up
Rtl8c	1.04623636345887	0.0237172609493387	Up
Cldn34c3	1.04172496967401	0.0064410498684143	Up
Bex1	1.03616566991536	0.016530949009289	Up
LOC118568479	1.00587723679715	0.000412124486616242	Up
ATP6	1.00015611613441	0.00128472556889112	Up
Mid1-ps1	-1.01498	0.0469211980275348	Down
Slc6a20b	-1.05197	0.0221475483136073	Down
LOC118568701	-1.05615	0.0123819950748867	Down
Mid1	-1.09184	0.000968633029726225	Down
Got2-ps1	-1.13226	0.0462087454935092	Down
Lilra5	-1.14444	0.0394532906153951	Down
Ccl27b	-1.19116	0.00768237656525587	Down
Bdkrb1	-1.2337	0.0244322586519031	Down
Endog	-1.28519	0.0204865106672216	Down
Rtp4	-1.2868	0.0107659585536143	Down
Ifi44	-1.41016	0.0292933843675934	Down
Padi1	-1.41908	0.0346726267354633	Down
Epha5	-1.42054	0.0367779371018731	Down
Sult6b1	-1.42851	0.0491517950215095	Down
Rpsa-ps8	-1.4624	0.0194256418866663	Down
Vwc2	-1.4864	0.0222032787473997	Down
Ifit2	-1.55049	0.0292586973166301	Down
Vmn1r223	-1.565	0.0377844205078482	Down
Nmu	-1.6344	0.0459048489846678	Down
Irx3os	-1.77545	0.0385565342186316	Down
LOC118567693	-1.77801	0.00238861347734137	Down
LOC115487412	-1.85468	0.0168980235643443	Down
Cldn20	-2.2169	0.0372208563202591	Down
Bmpr1b	-2.51126	0.0161539994333324	Down
Entpd4b	-4.17674	0.00221938346208017	Down

## Sheet: Table S1-thymus
Table S1
geneID	log2(fold change)	p-value	Regulation
Pvalb	7.19860795658127	2.34616884898082e-05	Up
Tnnc2	4.11181860750147	0.00131368043937955	Up
Tnni2	4.07382712203853	0.00218689166783515	Up
Tnnt3	3.87796976418393	1.01213381313672e-06	Up
Atp2a1	3.10668358022649	0.00591581083740322	Up
Krt77	3.1048545924732	0.0060733904038885	Up
Trim10	3.07194679935002	9.92907445137157e-05	Up
Calm4	3.05215459238779	0.0114099303731075	Up
Rps19-ps7	2.99015212974869	0.000154631251091451	Up
Gypa	2.88381689632292	0.000476245895707469	Up
Rps12l1	2.73100718282045	0.00193585646121251	Up
Lypd8l	2.69428635775971	0.0127731200205685	Up
Ryr1	2.24847681905605	0.0031381654398193	Up
Actn3	2.0598920566167	0.00153986302251479	Up
Rpl13a-ps1	2.02269674815613	0.000807956581949572	Up
Hal	2.01172877254584	0.0354068006607543	Up
Slc4a1	1.91932109153637	0.0109484639566614	Up
Apoa4	1.88087183348364	0.0448718512462595	Up
Ahsp	1.84603311040594	0.0448991898944152	Up
Zbtb16	1.81196990831248	0.000100488437460797	Up
Serinc2	1.51958547871592	0.0201459557173484	Up
Tent5c	1.47081638048005	0.00100395264330763	Up
Neb	1.39045826777557	0.00272274536660058	Up
Rpl19-ps6	1.34177141301951	0.0449673950799926	Up
Plek2	1.28060018036082	0.0490831090329312	Up
Rbp7	1.26310110252324	0.041039509506428	Up
Zfp493	1.25487789876473	0.0450408722693385	Up
Cib2	1.24956254329308	0.0370468400677211	Up
Cox7a1	1.15410320013672	0.0249325057464396	Up
Eif3j2	1.15066380100274	0.00639049337365511	Up
Mycl	1.10290083102106	0.0193727019960702	Up
Lox	1.07352301710546	0.0107144540142323	Up
Plag1	1.04340395402544	0.0375479268078005	Up
Car2	1.01944152912259	0.00210537084230439	Up
Adrb3	-1.00099	0.0220799384501649	Down
Oas2	-1.06924	0.0242646729404533	Down
Cd72	-1.08825	0.00715127043361608	Down
Phf11b	-1.10203	0.000319182808025303	Down
Pax5	-1.13198	0.0194597415078748	Down
Irf7	-1.14192	0.0066830719720365	Down
Eif5al3-ps	-1.17475	0.036362282385787	Down
Ly6c2	-1.17859	6.91239631689994e-05	Down
Cmpk2	-1.20227	0.0495928981343027	Down
Gbgt1	-1.2104	0.0381840830251354	Down
Oasl1	-1.23146	0.000422895048543069	Down
Serpinb3a	-1.25522	0.0456043174009521	Down
Phf11a	-1.28206	0.0107025491039897	Down
H1f4	-1.29369	0.000870033079214988	Down
Ifit1	-1.32451	0.00229670677760382	Down
Rpl18-ps1	-1.3312	0.0498366646225479	Down
Amn	-1.34957	0.0127813434354383	Down
Rtp4	-1.37333	0.00262258035106106	Down
Ifit1bl1	-1.37699	0.0285569049130233	Down
Ifi206	-1.40102	5.3788982299767e-06	Down
Cd22	-1.40463	0.00144749634719408	Down
Gbp10	-1.40738	0.0210703853003795	Down
Oas1a	-1.40997	0.00170415400277221	Down
Ifi213	-1.45058	0.000272986895709385	Down
H2bc8	-1.48161	0.0180014477888004	Down
H4c17	-1.49475	0.0125726364198911	Down
Xlr3b	-1.55276	0.0366631284659228	Down
Cxcl13	-1.61848	0.00803337249852408	Down
Ifit3	-1.619	0.00168501294861711	Down
Siglec1	-1.65946	0.00350721922773894	Down
Cxcr5	-1.74664	0.0366323913409795	Down
Ms4a4c	-1.75325	0.00484820427925525	Down
Fcmr	-1.78202	0.0149871710770224	Down
Slfn4	-1.82082	0.0247481118165758	Down
Ifit3b	-1.89146	0.00144510463714211	Down
Mx1	-1.92466	0.000625545721188065	Down
Mid1	-1.96765	0.00666244616188963	Down

[truncated: 13 more sheets: Table S2-brain, Table S2-colon, Table S2-heart, Table S2-intestine, Table S2-kidney, Table S2-liver, Table S2-lung, Table S2-spleen, Table S2-testis, Table S2-thymus, Table S3_x0009__x0009__x0009__x0009_, Table S4, Table S5]
