# Supplementary material for: Gut microbiota-derived queuine reprograms colon gene expression and alleviates colorectal cancer synergistically with Limosilactobacillus reuteri
Source: Research Square preprint supplement (doi:10.21203/rs.3.rs-7540054/v1), 2025-10-29
Supplement: Supplementary file 2 [file eefa4dc0d207ad4c47bd409d.docx]

**Supplementary Figures S1-S8 and figure legends**


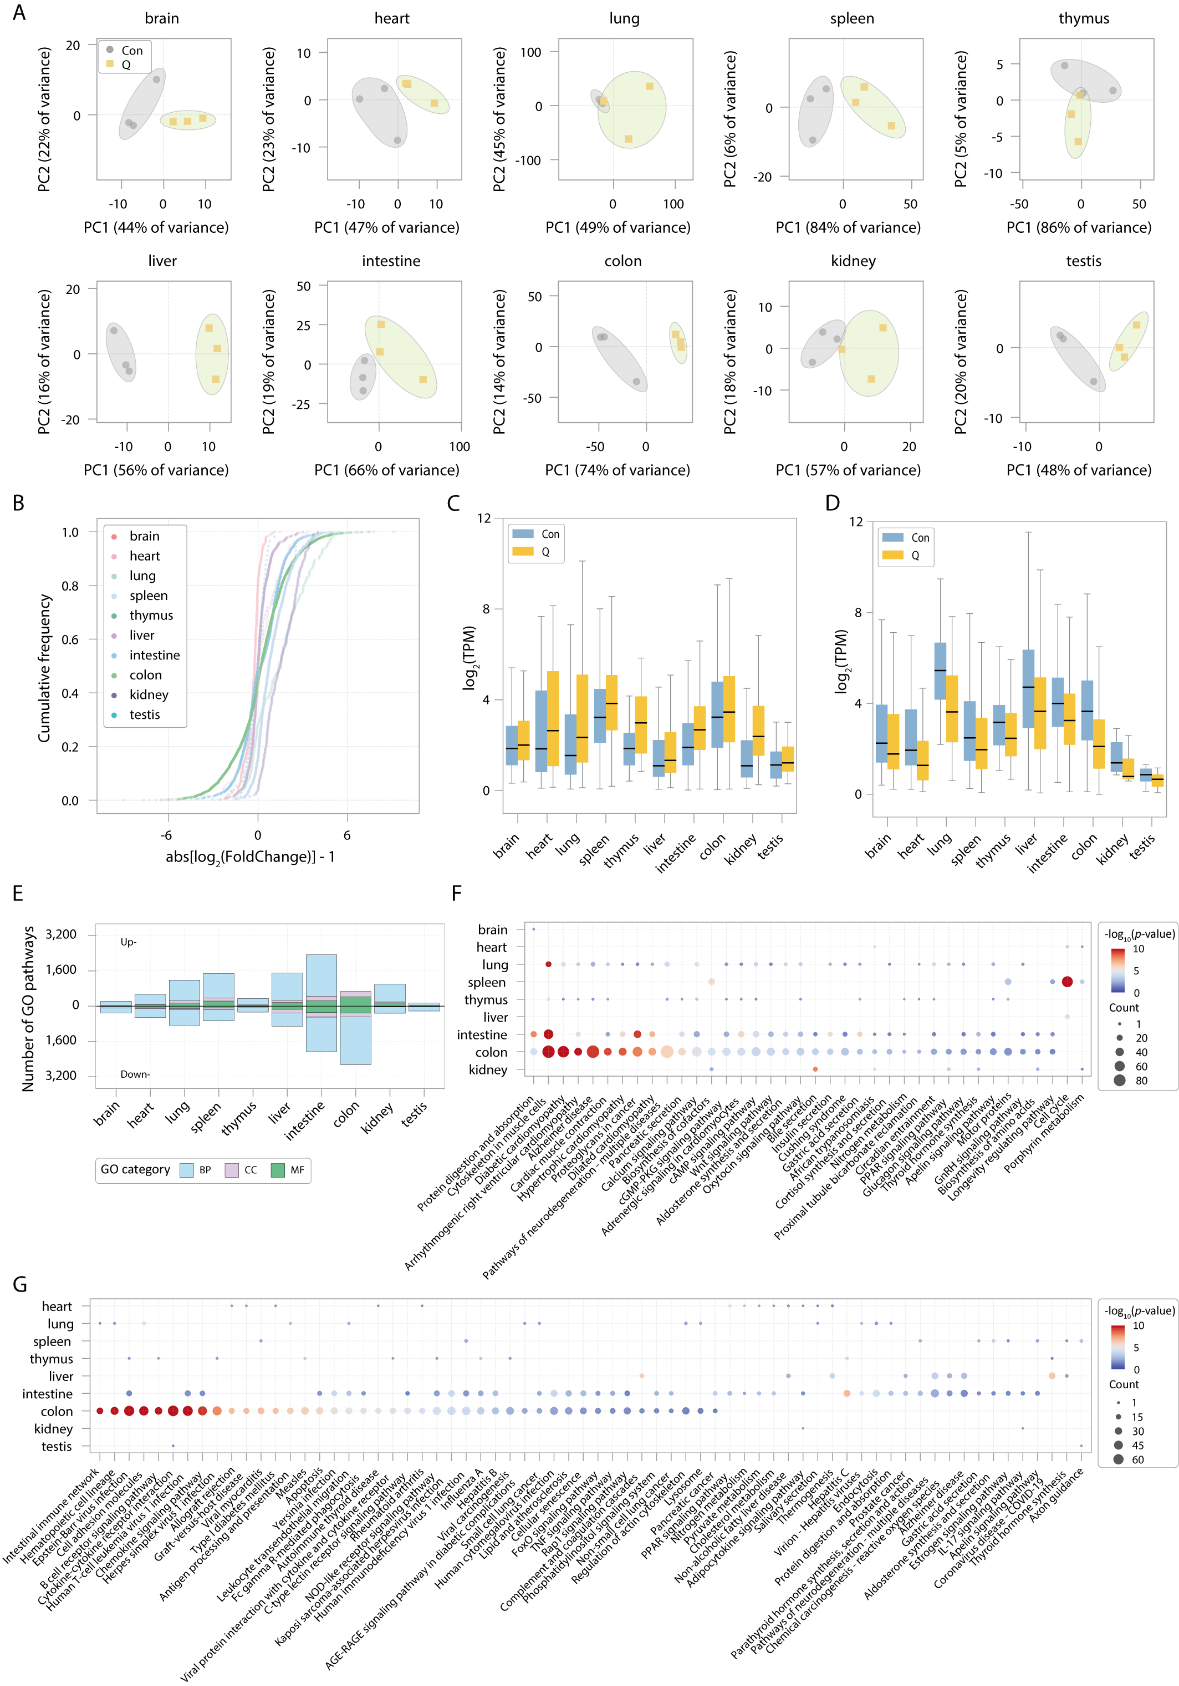


**Fig. S1. Transcriptomic analysis of queuine-induced changes in SPF mice. (A)** PCA of transcriptome datasets from ten tissues of SPF mice (*n*=3). **(B)** Cumulative frequency plot of gene expression fold changes between queuine-treated and control groups. **(C)** Grouped boxplot showing TPM values of upregulated DEGs between two groups. **(D)** Grouped boxplot showing TPM values of downregulated DEGs between two groups. **(E)** Enriched GO pathways across different tissues, categorized into biological process (BP), cellular component (CC), and molecular function (MF). **(F)** Dot plot of KEGG pathways enriched among upregulated DEGs across ten tissues, showing pathways present in at least four tissues. **(G)** Dot plot of KEGG pathways enriched among downregulated DEGs across ten tissues, showing pathways present in at least four tissues.


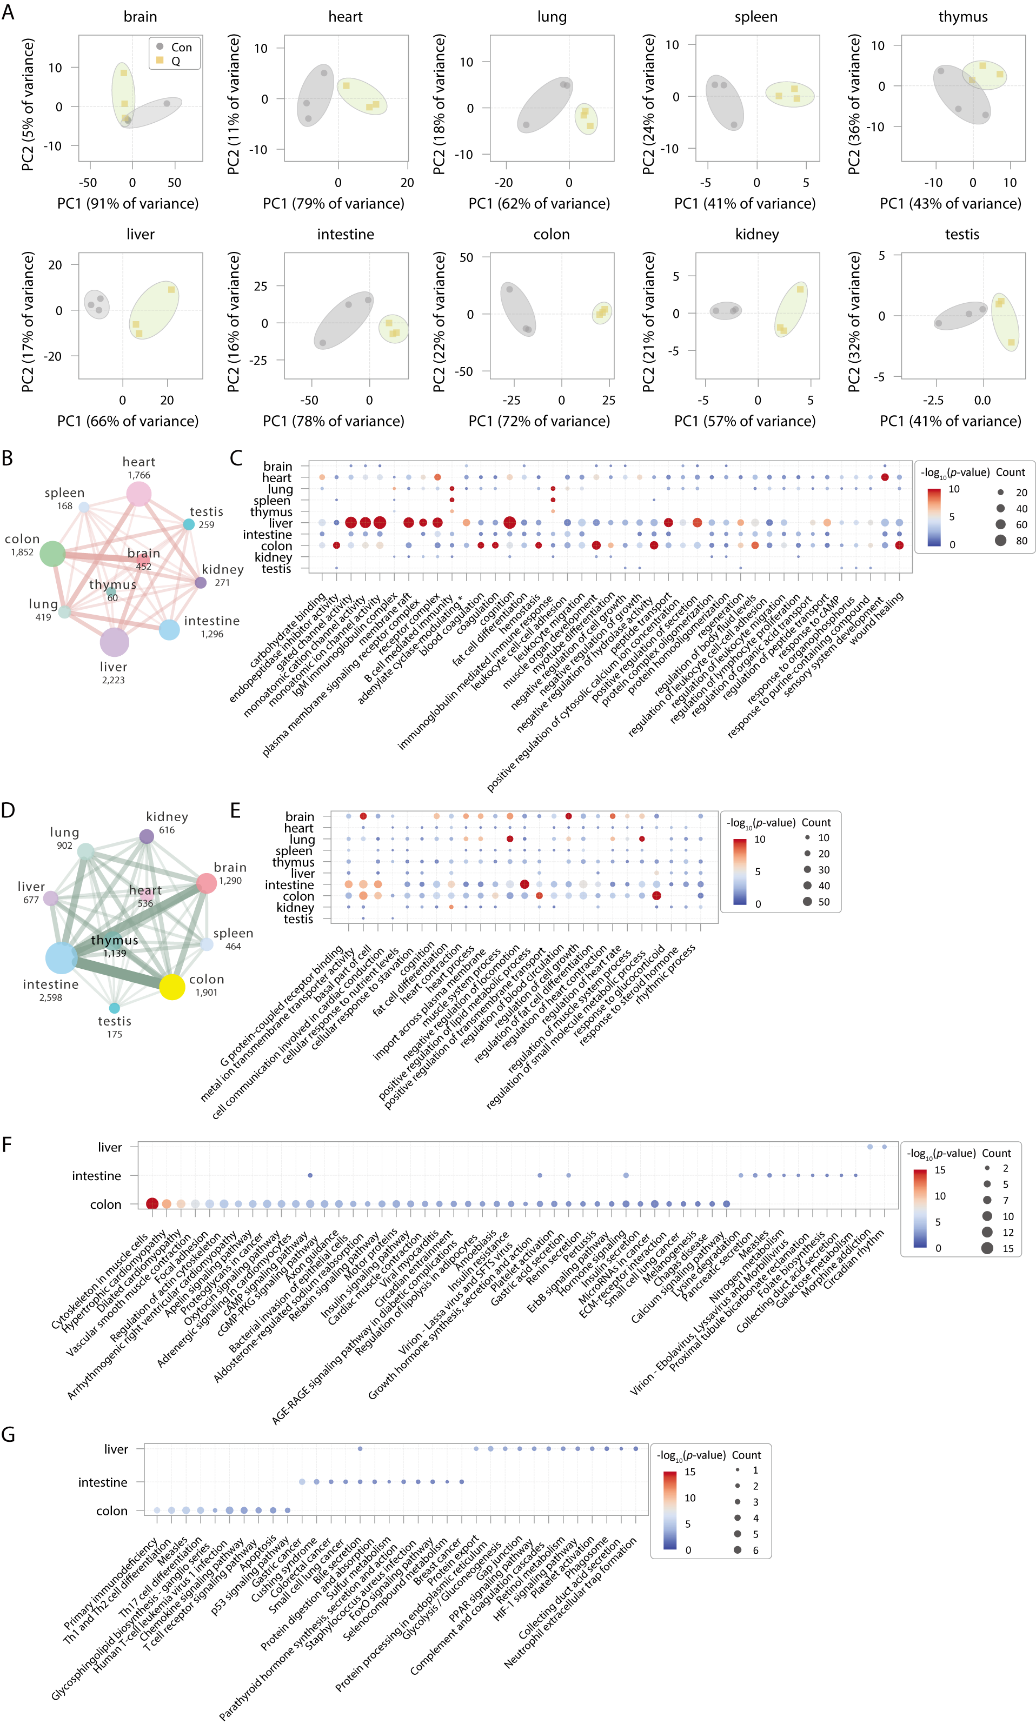


**Fig. S2. Transcriptomic analysis of queuine-induced variations in GF mice. (A)** PCA of mRNA transcriptome datasets from GF mice (*n* = 3). **(B)** Cytoscape network illustrating shared GO pathways upregulated DEGs across ten tissues in GF mice. **(C)** Dot plot of enriched GO pathways associated with upregulated DEGs across ten tissues in GF mice. Pathways enriched in at least five tissues are shown. **(D)** Cytoscape network illustrating shared GO pathways downregulated DEGs across ten tissues in GF mice. **(E)** Dot plot of enriched GO pathways associated with downregulated DEGs across ten tissues in GF mice. Pathways enriched in at least six tissues are shown. **(F)** Dot plot of KEGG pathways enriched among upregulated DEGs across three tissues. **(G)** Dot plot of KEGG pathways enriched among upregulated DEGs across three tissues.


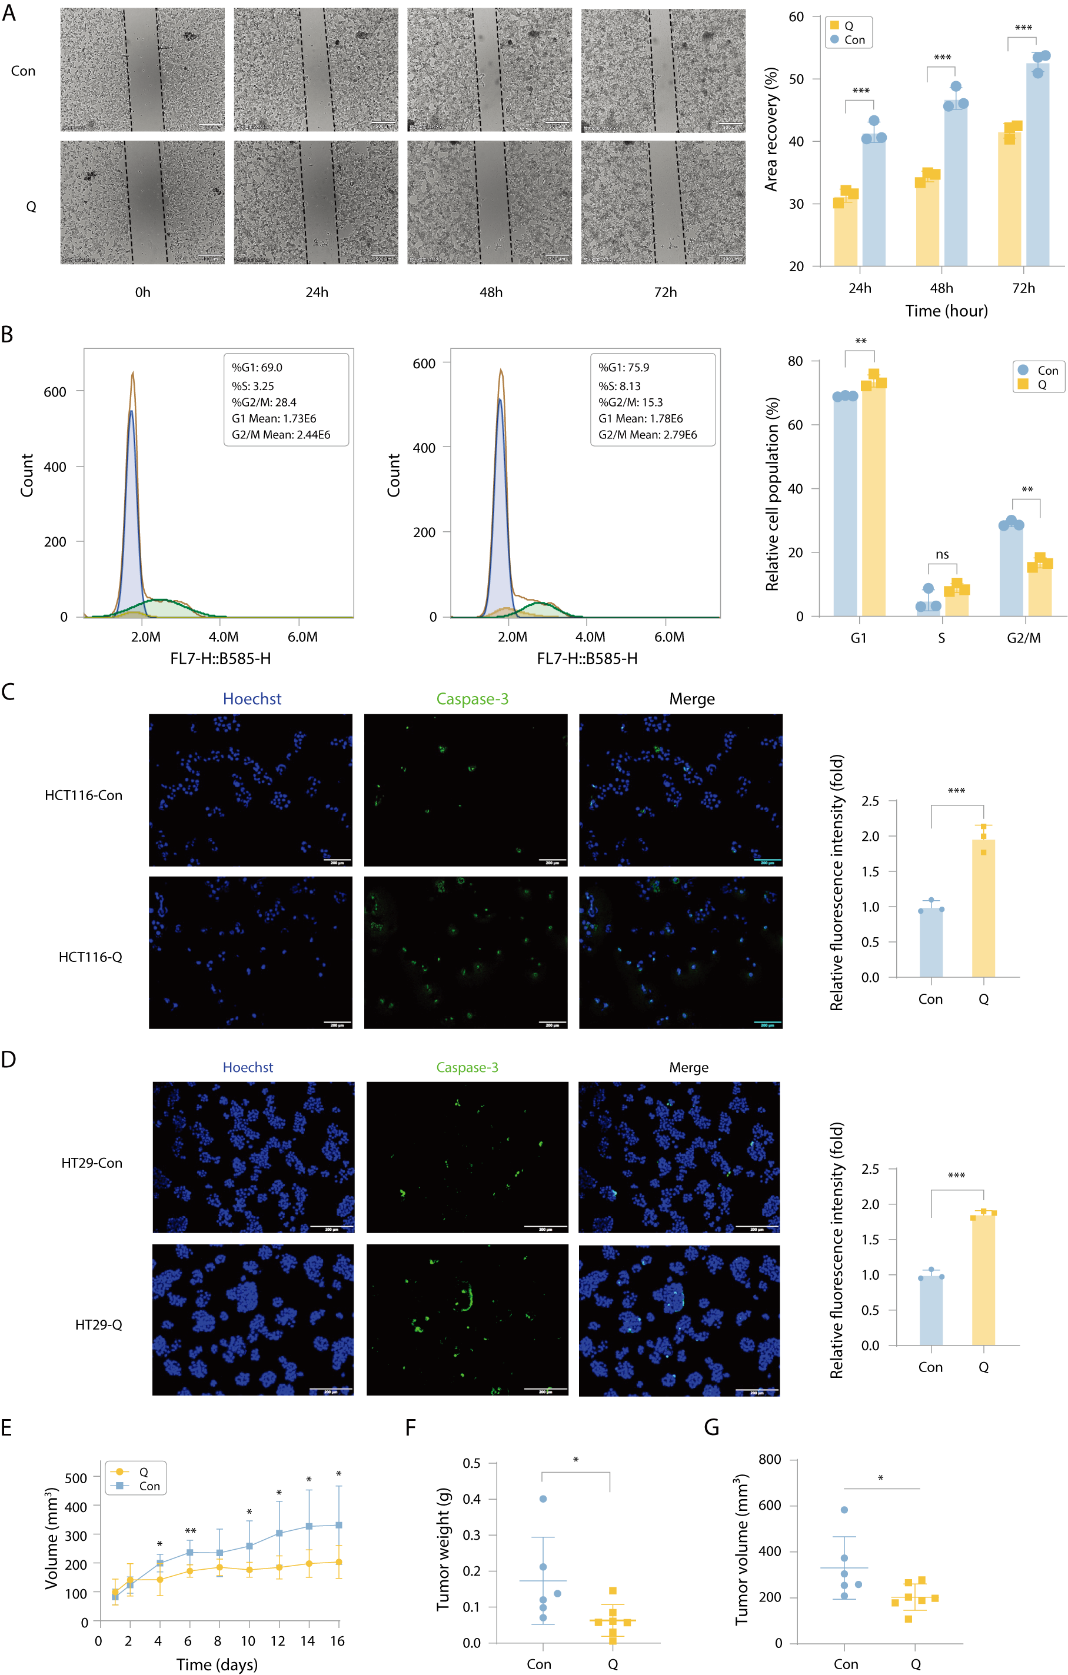


**Fig. S3. Queuine inhibits the proliferation and migration of CRC. (A)** Cell scratch assay of HCT116 cells showing the percentage of healed area of cells in each group at different time points (*n* = 3). **(B)** Cell cycle assay of HT29 cells showing the cycle distribution of cells across different phases among various groups (*n* = 3). **(C)** Immunofluorescence of Hoechst and Caspase-3 after treatment of HCT116 cells with queuine (*n* = 3). **(D)** Immunofluorescence of Hoechst and Caspase-3 after treatment of HT29 cells with queuine (*n* = 3). **(E)** The solid tumor volume was measured. The measurement was calculated every two days (Con group *n* = 6, Q group *n* = 7). **(F)** The plot showing the tumor weight (Con group *n* = 6, Q group *n* = 7). **(G)** The plot showing the tumors volume (Con group *n* = 6, Q group *n* = 7). Mean ± *SD*; *** *p* < 0.001, ** *p* < 0.01, * *p* < 0.05, *ns* *p* > 0.05, measured with the unpaired, two-tailed Student's t-test.


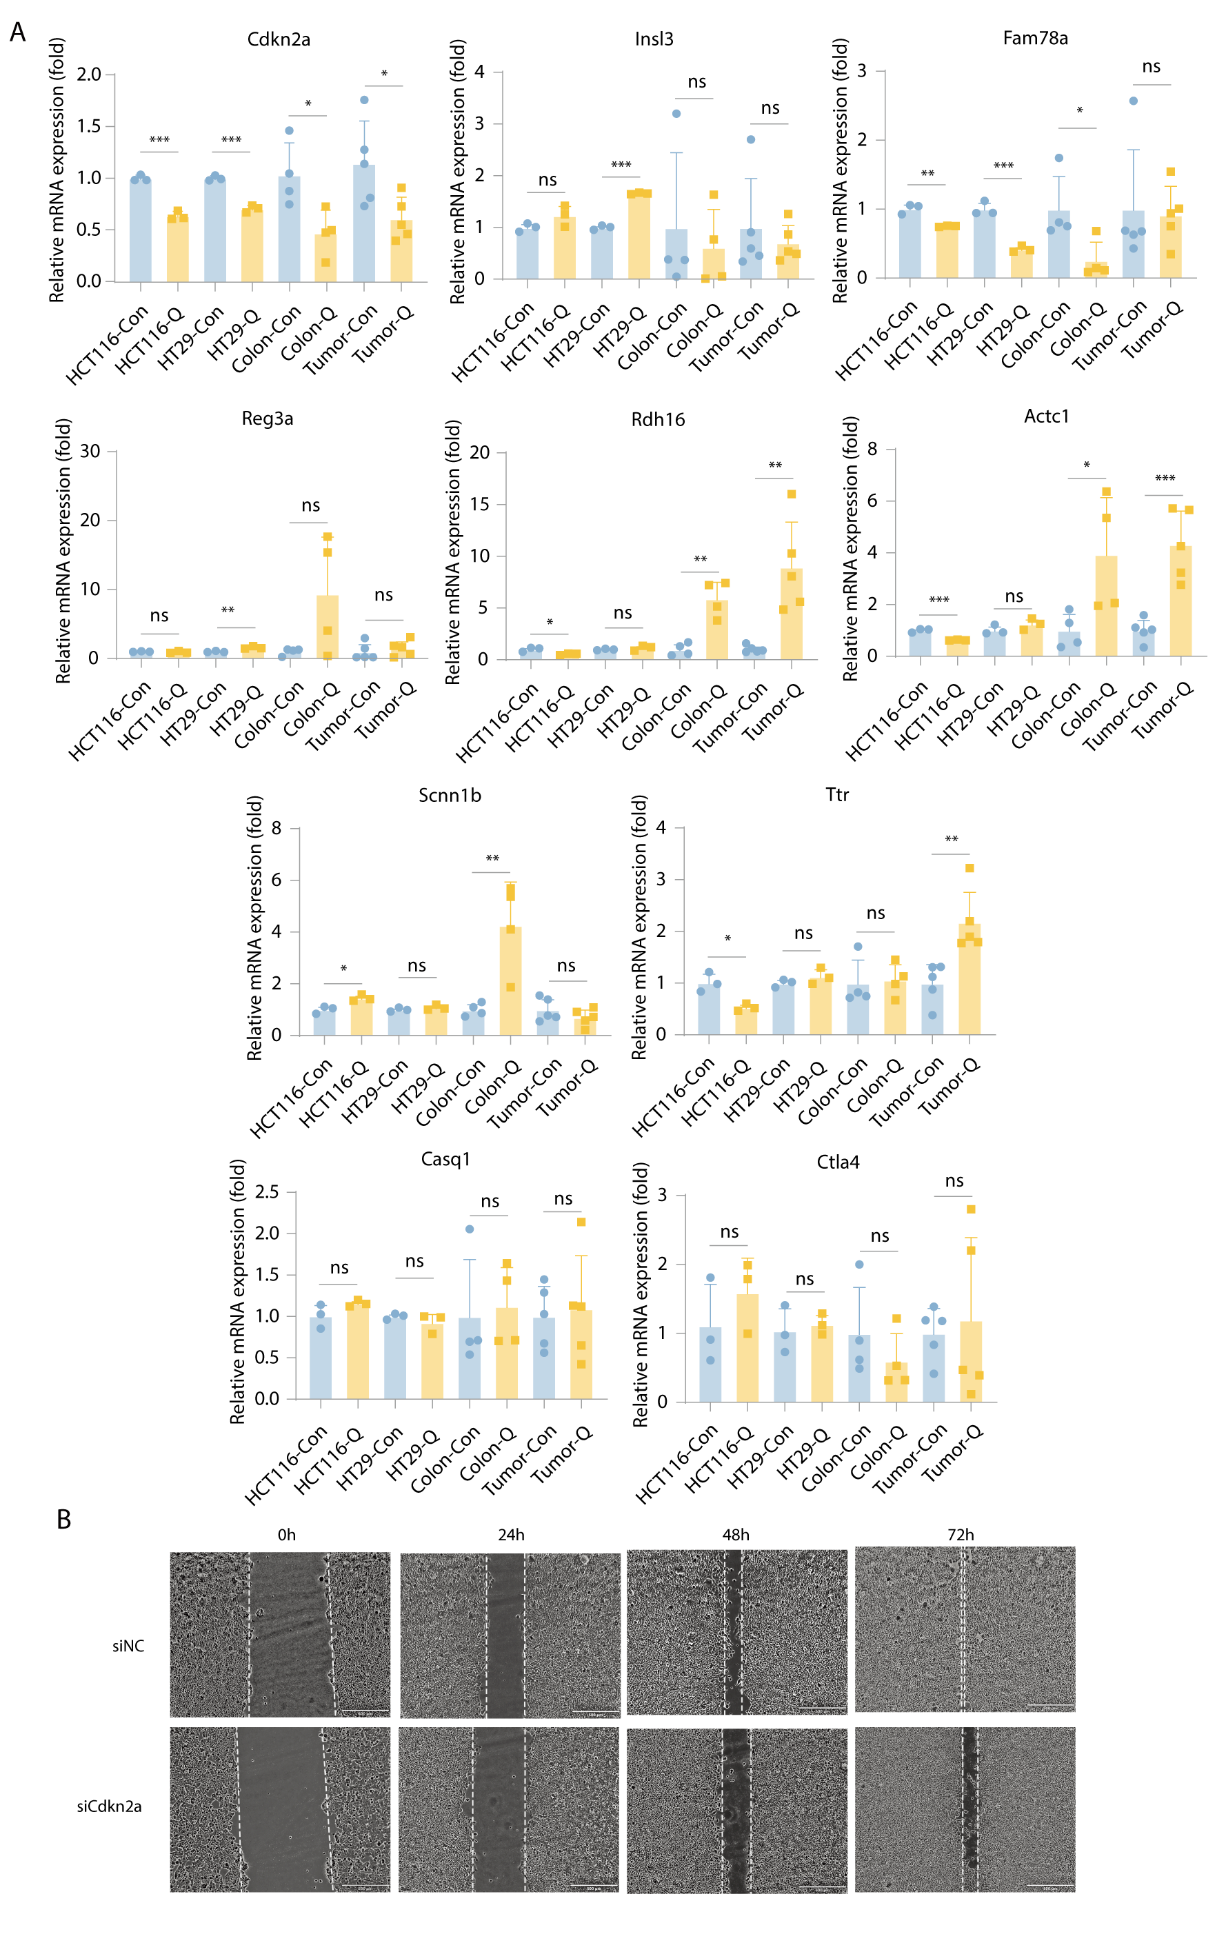


**Fig. S4. Queuine suppresses *Cdkn2a* expression in CRC cells. (A)** qPCR validation of selected DEGs in different CRC samples (*n* = 3). Mean ± *SD*; *** *p* < 0.001, ** *p* < 0.01, * *p* < 0.05, *ns p* > 0.05, measured with the unpaired, two-tailed Student's t-test. **(B)** Cell scratch assay in each group at different time points (*n* = 3).

**
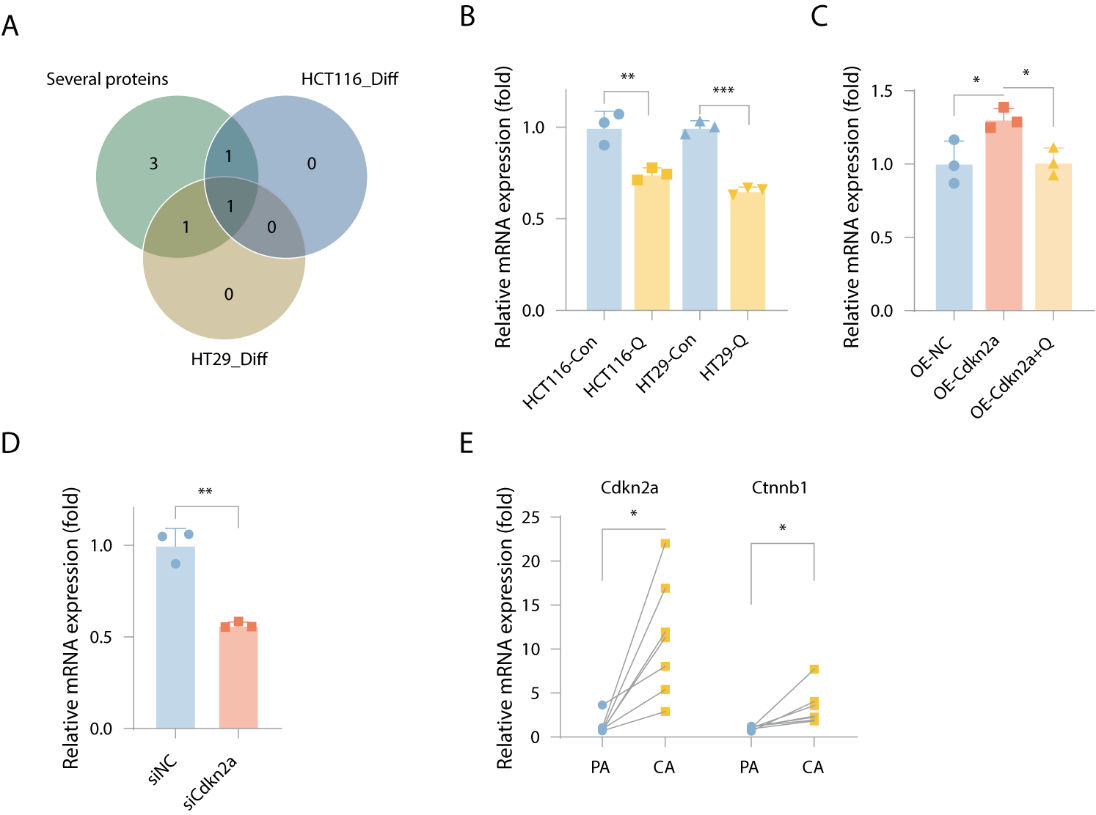
**

**Fig. S5. Queuine-induced *Cdkn2a* directly interacts with *Ctnnb1* in CRC samples. (A)** Venn diagram of proteins differentially regulated by CDKN2A modulation in HCT116 and HT29. **(B)** RT-qPCR analysis of *Ctnnb1* mRNA expression levels in HCT116 and HT29 cells treated with or without queuine (*n* = 3). **(C)** RT-qPCR analysis of *Ctnnb1* mRNA expression levels after overexpressed *Cdkn2a* in HCT116 cells treated with or without queuine (*n* = 3). **(D)** RT-qPCR analysis of *Ctnnb1* mRNA expression levels after si*Cdkn2a* in HCT116 cells (*n* = 3). **(E)** RT-qPCR analysis of CDKN2A and CTNNB1 in CRC cancer tissue (CA) and paracancerous tissue (PA) (n = 7). Mean ± *SD*; *** *p* < 0.001, ** *p* < 0.01, * *p* < 0.05, measured with the unpaired, two-tailed Student's t-test.

*
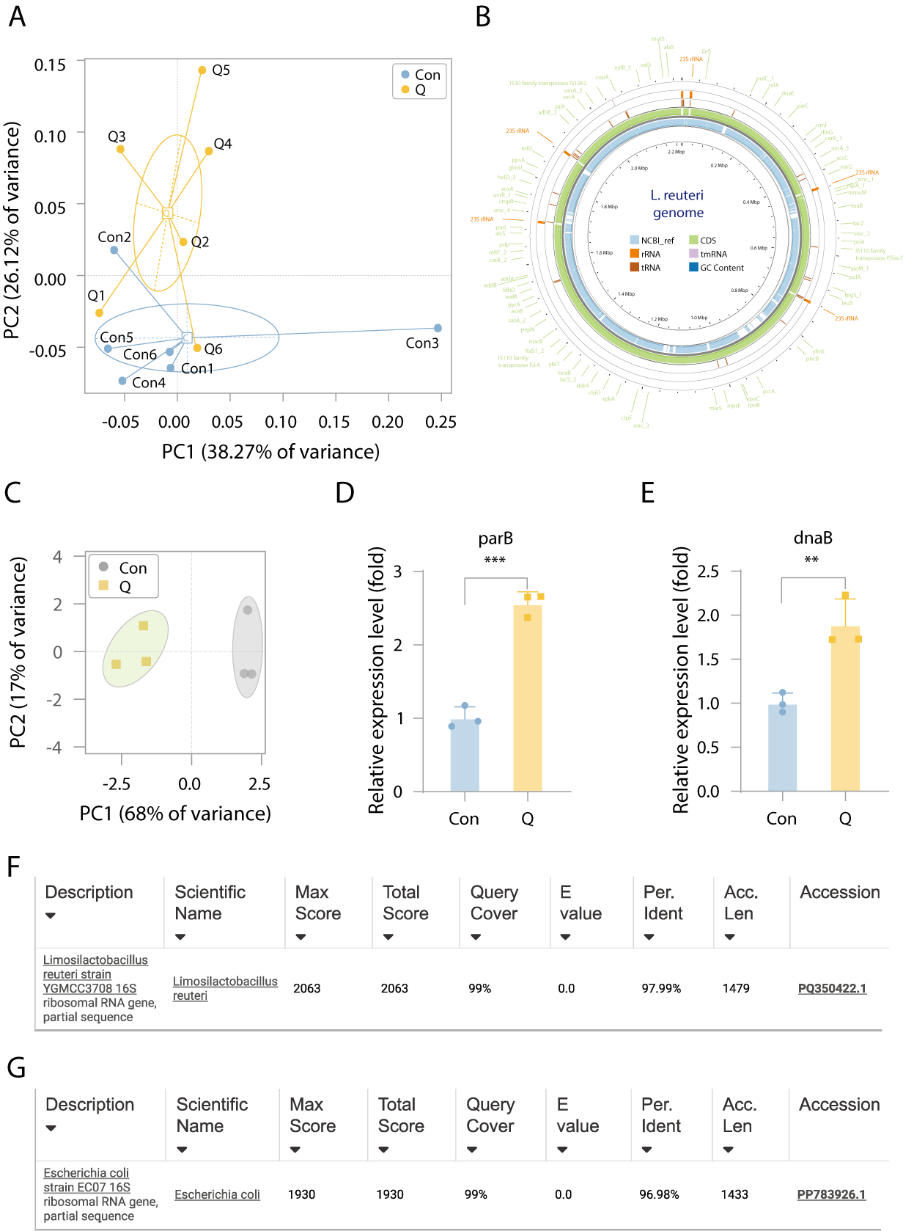
*

**Fig. S6. Effects of queuine on *L. reuteri*. (A)** PCoA analysis of the gut microbial composition at the species level**. (B)** Circos plot of the genome of *L. reuteri*. Key genomic features, including representative genes and functional elements, are annotated around the circular genome. **(C)** PCA of mRNA transcriptome datasets of *L. reuteri* (*n* = 3). **(D)** RT-qPCR analysis of *parB* mRNA expression levels in *L. reuteri* treated with or without queuine (*n* = 3). **(E)** RT-qPCR analysis of *dnaB* mRNA expression levels in *L. reuteri* treated with or without queuine (*n* = 3). **(F)** *L. reuteri* was identified by 16S PCR sequencing from bacterial pure culture. **(G)** *E. coli* was identified by 16S PCR sequencing from bacterial pure culture. Mean ± *SD*; *** *p* < 0.001, ** *p* < 0.01, measured with the unpaired, two-tailed Student's t-test.


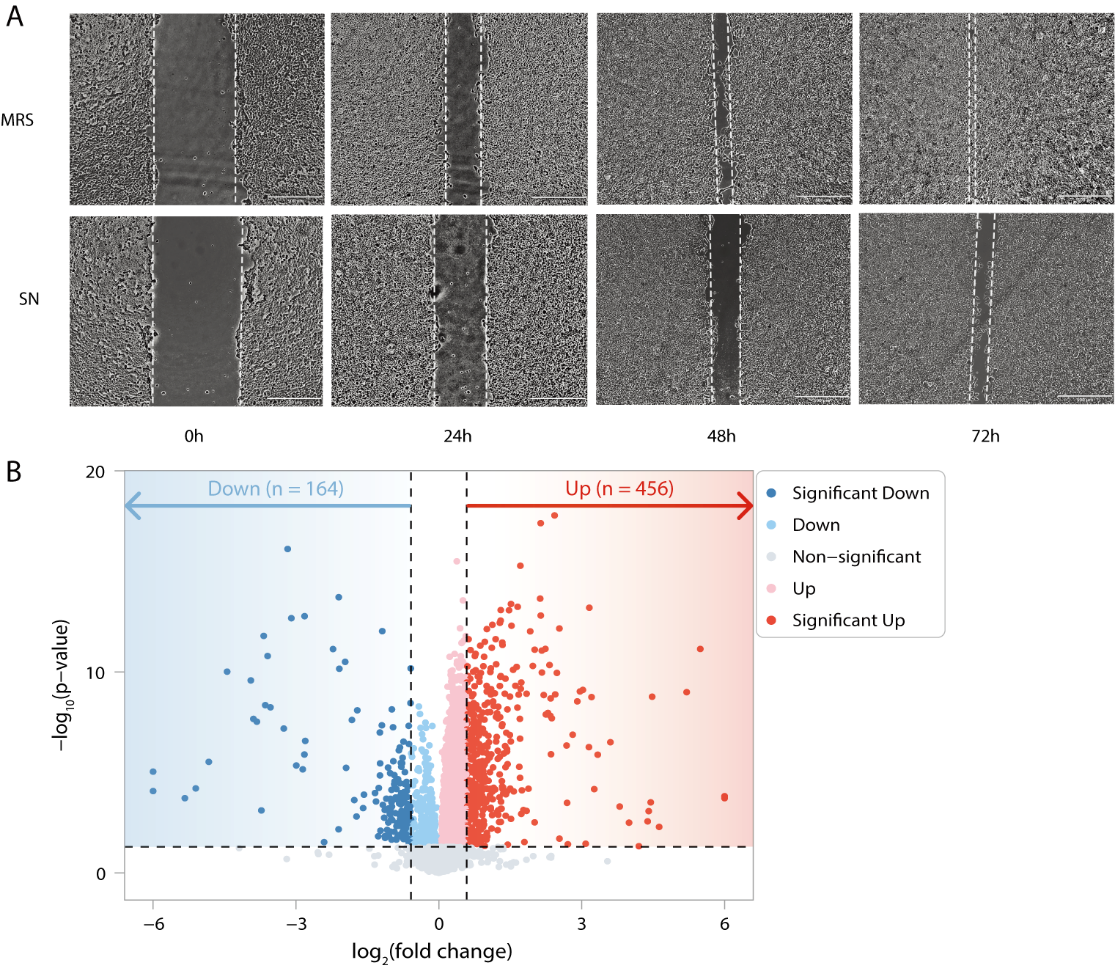


**Fig. S7. *L. reuteri* suppresses the proliferation and migration of CRC cells. (A)** Cell scratch assay showing the percentage of healed area of cells at different time points (*n* = 3). **(B)** Volcano plot of differentially abundant metabolites in *L. reuteri* after queuine treatment. Mean ± *SD*; *** *p* < 0.001, ** *p* < 0.01, * *p* < 0.05, measured with the unpaired, two-tailed Student's t-test.


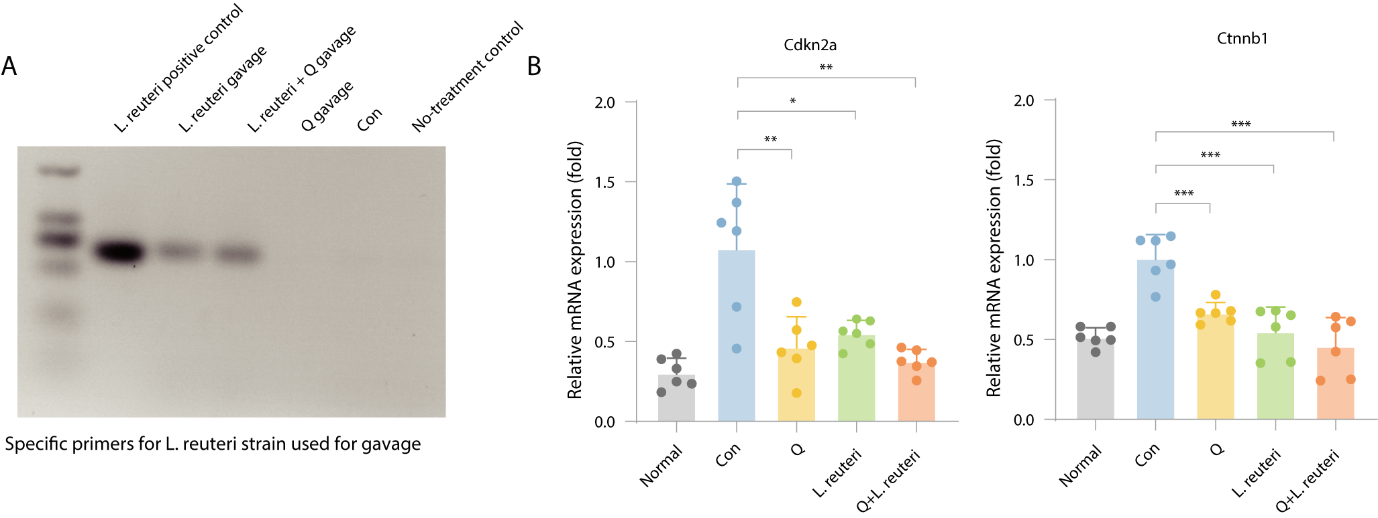


**Fig. S8. Effects of queuine in *vivo*.**

**(A)** PCR result of DNA extracted from fecal samples using specific primers. **(B)** RT-qPCR analysis of *Cdkn2a* and *Ctnnb1* mRNA levels in each group (*n* = 6).

**Additional file 2:**

Table S1.Differentially expressed genes identified by RNA-seq across 10 organs in SPF mice.

Table S2. Differentially expressed genes identified by RNA-seq across 10 organs in GF mice.

Table S3. Differentially expressed genes identified by RNA-seq in *L. reuteri*.

Table S4. Metabolomic data from different groups of *L. reuteri*.

Table S5. The primers used in this study.
